# Supplementary material for: Diversity and evolution of the vertebrate chemoreceptor gene repertoire
Source: PubMed Central journal article supplement (PMC10869828; doi:10.1038/s41467-024-45500-y), 2024-02-15
Supplement: 41467_2024_45500_MOESM1_ESM.pdf [file 41467_2024_45500_MOESM1_ESM.pdf]

**This PDF file includes:**

Supplementary Tables 1-7  
Supplementary Figures 1-56

**Other supplementary materials for this manuscript include the following:**

Supplementary Data 1

**Supplementary Table 1 | Summary statistics of the number of genome assemblies used for this study.** Note that the total number of genomes analyzed for the BUSCO80 dataset was 1,531 genomes, which corresponds to the 1,527 genomes with >80% complete BUSCO genes plus the five agnathan genomes (Supplementary Fig. 2) minus the genome of *S. occidentalis* (Supplementary Fig. 3). For the BUSCO90 dataset, the total number was 1,180 genomes, which corresponds to the 1,176 genomes with >90% complete BUSCO genes plus the five agnathan genomes minus the genome of *S. occidentalis*. Nb of species: number of genome assemblies downloaded from NCBI; Nb of species in tree: number of species for which phylogenetic information was available; Nb of species >80% BUSCO: number of species that passed the >80% complete BUSCO filter; Nb of species >80% BUSCO and present in the tree: number of species that passed the >80% complete BUSCO filter and for which phylogenetic information was available; Nb of species >90% BUSCO: number of species that passed the >90% complete BUSCO filter; Nb of species >90% BUSCO and present in the tree: number of species that passed the >90% complete BUSCO filter and for which phylogenetic information was available. BUSCO raw results be found in Supplementary Data 1. Source data are provided as a Source Data file.

| Class          | Nb of species | Nb of species in tree | Nb of species >80% BUSCO | Nb of species >80% BUSCO and present in the tree | Nb of species >90% BUSCO | Nb of species >90% BUSCO and present in the tree |
|----------------|---------------|-----------------------|--------------------------|--------------------------------------------------|--------------------------|--------------------------------------------------|
| Agnatha        | 5             | 5                     | 0                        | 0                                                | 0                        | 0                                                |
| Chondrichthyes | 14            | 14                    | 10                       | 10                                               | 7                        | 7                                                |
| Actinopterygii | 900           | 764                   | 483                      | 449                                              | 369                      | 345                                              |
| Coelacanth     | 1             | 1                     | 1                        | 1                                                | 0                        | 0                                                |
| Dinoi          | 2             | 2                     | 1                        | 1                                                | 1                        | 1                                                |
| Amphibia       | 32            | 32                    | 20                       | 20                                               | 13                       | 13                                               |
| Mammals        | 555           | 501                   | 440                      | 392                                              | 387                      | 343                                              |
| Lepidosauria   | 66            | 64                    | 54                       | 53                                               | 45                       | 44                                               |
| Testudines     | 27            | 27                    | 26                       | 26                                               | 25                       | 25                                               |
| Crocodylia     | 4             | 4                     | 4                        | 4                                                | 3                        | 3                                                |
| Aves           | 604           | 574                   | 488                      | 467                                              | 326                      | 312                                              |
| Total          | 2210          | 1988                  | 1527                     | 1423                                             | 1176                     | 1093                                             |

**Supplementary Table 2 | Correlations between the number of complete genes across chemoreceptor gene families taking genome size into account.** The output of multiple two-sided pGLS models for comparisons between the complete gene number in each chemoreceptor family, with interactions between predictors (gene family \* genome size) or without (gene family + genome size), is reported for mammals, birds and ray-finned fishes. All *P*-values between the number of complete genes across chemoreceptor families remained significant when taking the genome size into account, except between the number of complete *OR* and complete *TAAR* genes of birds (in the BUSCO80 and the BUSCO90 datasets). In some cases, the interaction between gene families and the genome size was significant, but the model  $R^2$  did not increase, or increased only slightly compared to the additive model or compared to the simple models that did not take the genome size into account (Supplementary Fig. 6). Source data are provided as a Source Data file.

| Species     | Response ~ pred1+pred2  | Dataset | Adjusted R <sup>2</sup> | pred1 p-value | pred2 p-value | pred interaction p-value | pGLS model p-value |
|-------------|-------------------------|---------|-------------------------|---------------|---------------|--------------------------|--------------------|
| Mammalia    | TAAR ~ OR + Genome      | BUSCO80 | 0.1804                  | <2e-16        | 0.9533        | /                        | <2e-16             |
| Mammalia    | TAAR ~ OR * Genome size | BUSCO80 | 0.1788                  | 0.0009764     | 0.18          | 0.118                    | <2e-16             |
| Actinoptery | TAAR ~ OR + Genome      | BUSCO80 | 0.3937                  | <2e-16        | 0.03317       | /                        | <2e-16             |
| Actinoptery | TAAR ~ OR * Genome size | BUSCO80 | 0.4231                  | 1.512e-06     | 0.133         | 0.003                    | <2e-16             |
| Aves        | TAAR ~ OR + Genome      | BUSCO80 | 0.008198                | 0.075         | 0.77          | /                        | 0.1457             |
| Aves        | TAAR ~ OR * Genome size | BUSCO80 | 0.03862                 | 0.0001373     | 0.0741752     | 3.599e-05                | 8.674e-05          |
| Mammalia    | V1R ~ OR + Genome size  | BUSCO80 | 0.09941                 | 1.319e-10     | 0.63754       | /                        | 5.278e-10          |
| Mammalia    | V1R ~ OR * Genome size  | BUSCO80 | 0.1113                  | 0.299821      | 0.042383      | 0.115                    | 1.418e-10          |
| Actinoptery | V1R ~ OR + Genome size  | BUSCO80 | 0.1311                  | 2.700e-13     | 0.06878       | /                        | 8.971e-15          |
| Actinoptery | V1R ~ OR * Genome size  | BUSCO80 | 0.2313                  | 0.01018       | 1.406e-07     | 1.619e-13                | <2e-16             |
| Mammalia    | V2R ~ OR + Genome size  | BUSCO80 | 0.02262                 | 0.0014        | 0.845         | /                        | 0.004306           |
| Mammalia    | V2R ~ OR * Genome size  | BUSCO80 | 0.1788                  | 0.0009764     | 0.1790147     | 0.593                    | <2e-16             |
| Actinoptery | V2R ~ OR + Genome size  | BUSCO80 | 0.4405                  | <2e-16        | 0.6578        | /                        | <2e-16             |
| Actinoptery | V2R ~ OR * Genome size  | BUSCO80 | 0.4393                  | <2e-16        | 0.7956        | 0.977                    | <2e-16             |
| Mammalia    | V1R ~ TAAR + Genome     | BUSCO80 | 0.03065                 | 0.0004048     | 0.2484310     | /                        | 0.0008663          |
| Mammalia    | V1R ~ TAAR * Genome     | BUSCO80 | 0.05201                 | 0.022262      | 0.053932      | 0.001913                 | 2.83e-05           |
| Actinoptery | V1R ~ TAAR + Genome     | BUSCO80 | 0.1107                  | 5.462e-11     | 0.03456       | /                        | 1.582e-12          |
| Actinoptery | V1R ~ TAAR * Genome     | BUSCO80 | 0.1668                  | 0.6915        | 0.1262        | 5.822e-07                | <2e-16             |
| Mammalia    | V2R ~ TAAR + Genome     | BUSCO80 | 0.03149                 | 0.0002006     | 0.5250194     | /                        | 0.0007312          |
| Mammalia    | V2R ~ TAAR * Genome     | BUSCO80 | 0.04901                 | 0.052041      | 0.046559      | 0.004808                 | 5.093e-05          |
| Actinoptery | V2R ~ TAAR + Genome     | BUSCO80 | 0.2975                  | <2e-16        | 0.6146        | /                        | <2e-16             |
| Actinoptery | V2R ~ TAAR * Genome     | BUSCO80 | 0.3047                  | <2e-16        | 0.06051       | 0.01826                  | <2e-16             |
| Mammalia    | V1R ~ V2R + Genome size | BUSCO80 | 0.4199                  | <2e-16        | 0.33656       | /                        | <2e-16             |
| Mammalia    | V1R ~ V2R * Genome size | BUSCO80 | 0.42                    | 0.12913       | 0.48893       | 0.30542                  | <2e-16             |
| Actinoptery | V1R ~ V2R + Genome size | BUSCO80 | 0.1079                  | 1.110e-10     | 0.008812      | /                        | 3.222e-12          |
| Actinoptery | V1R ~ V2R * Genome size | BUSCO80 | 0.1895                  | 0.007245      | 0.003780      | 1.017e-10                | <2e-16             |
| Actinoptery | T1R ~ T2R + Genome size | BUSCO80 | 0.05012                 | 0.01705       | 5.067e-05     | /                        | 3.863e-06          |
| Actinoptery | T1R ~ T2R * Genome size | BUSCO80 | 0.04806                 | 0.32310       | 0.05152       | 0.87148                  | 1.593e-05          |
| Mammalia    | OLR ~ TR + Genome size  | BUSCO80 | 0.1535                  | 4.441e-16     | 0.8915        | /                        | 3.086e-15          |
| Mammalia    | OLR ~ TR * Genome size  | BUSCO80 | 0.1519                  | 0.02931       | 0.62726       | 0.63432                  | 1.895e-14          |
| Actinoptery | OLR ~ TR + Genome size  | BUSCO80 | 0.1919                  | <2e-16        | 0.002527      | /                        | <2e-16             |
| Actinoptery | OLR ~ TR * Genome size  | BUSCO80 | 0.1917                  | 9.825e-09     | 0.008183      | 0.320127                 | <2e-16             |
| Aves        | OLR ~ TR + Genome size  | BUSCO80 | 0.1586                  | 4.441e-16     | 0.1327        | /                        | <2e-16             |
| Aves        | OLR ~ TR * Genome size  | BUSCO80 | 0.1735                  | 8.581e-06     | 0.007953      | 0.002957                 | <2e-16             |
| Mammalia    | TAAR ~ OR + Genome      | BUSCO90 | 0.1557                  | 3.02e-14      | 0.9586        | /                        | 1.182e-13          |
| Mammalia    | TAAR ~ OR * Genome size | BUSCO90 | 0.1602                  | 0.001406      | 0.125979      | 0.082593                 | 1.918e-13          |
| Actinoptery | TAAR ~ OR + Genome      | BUSCO90 | 0.3621                  | <2e-16        | 0.1084        | /                        | <2e-16             |
| Actinoptery | TAAR ~ OR * Genome size | BUSCO90 | 0.3802                  | 8.839e-05     | 0.063678      | 0.001495                 | <2e-16             |
| Aves        | TAAR ~ OR + Genome      | BUSCO90 | -0.003152               | 0.3730        | 0.3477        | /                        | 0.603              |
| Aves        | TAAR ~ OR * Genome size | BUSCO90 | 0.02891                 | 0.0010067     | 0.1064870     | 0.0008717                | 0.006958           |
| Mammalia    | V1R ~ OR + Genome size  | BUSCO90 | 0.06024                 | 8.169e-06     | 0.2390        | /                        | 9.551e-06          |
| Mammalia    | V1R ~ OR * Genome size  | BUSCO90 | 0.06401                 | 0.54712       | 0.34203       | 0.12676                  | 1.243e-05          |
| Actinoptery | V1R ~ OR + Genome size  | BUSCO90 | 0.1001                  | 5.580e-09     | 0.2787        | /                        | 5.413e-09          |
| Actinoptery | V1R ~ OR * Genome size  | BUSCO90 | 0.1692                  | 0.02081       | 6.008e-09     | 8.781e-09                | 2.673e-14          |
| Mammalia    | V2R ~ OR + Genome size  | BUSCO90 | 0.02183                 | 0.01346       | 0.15062       | /                        | 0.008664           |
| Mammalia    | V2R ~ OR * Genome size  | BUSCO90 | 0.02065                 | 0.7903        | 0.9080        | 0.4448                   | 0.01793            |
| Actinoptery | V2R ~ OR + Genome size  | BUSCO90 | 0.3616                  | <2e-16        | 0.3037        | /                        | <2e-16             |
| Actinoptery | V2R ~ OR * Genome size  | BUSCO90 | 0.3598                  | 5.048e-12     | 0.4618        | 0.8290                   | <2e-16             |
| Mammalia    | V1R ~ TAAR + Genome     | BUSCO90 | 0.03311                 | 0.001356      | 0.089331      | /                        | 0.001204           |
| Mammalia    | V1R ~ TAAR * Genome     | BUSCO90 | 0.06111                 | 0.0087516     | 0.0464930     | 0.0009118                | 2.062e-05          |
| Actinoptery | V1R ~ TAAR + Genome     | BUSCO90 | 0.08733                 | 9.372e-08     | 0.1811        | /                        | 6.035e-08          |
| Actinoptery | V1R ~ TAAR * Genome     | BUSCO90 | 0.3598                  | 5.048e-12     | 0.4618        | 0.8290                   | <2e-16             |
| Mammalia    | V2R ~ TAAR + Genome     | BUSCO90 | 0.04345                 | 0.0002121     | 0.0923738     | /                        | 0.0001938          |
| Mammalia    | V2R ~ TAAR * Genome     | BUSCO90 | 0.06254                 | 0.045240      | 0.121786      | 0.004944                 | 1.608e-05          |
| Actinoptery | V2R ~ TAAR + Genome     | BUSCO90 | 0.2566                  | <2e-16        | 0.6521        | /                        | <2e-16             |
| Actinoptery | V2R ~ TAAR * Genome     | BUSCO90 | 0.2606                  | 1.554e-14     | 0.47423       | 0.08965                  | <2e-16             |
| Mammalia    | V1R ~ V2R + Genome size | BUSCO90 | 0.4571                  | <2e-16        | 0.364350      | /                        | <2e-16             |
| Mammalia    | V1R ~ V2R * Genome size | BUSCO90 | 0.457                   | 0.10848       | 0.50291       | 0.33257                  | <2e-16             |
| Actinoptery | V1R ~ V2R + Genome size | BUSCO90 | 0.08018                 | 2.897e-07     | 0.06637       | /                        | 2.29e-07           |
| Actinoptery | V1R ~ V2R * Genome size | BUSCO90 | 0.1791                  | 0.005514      | 0.002108      | 6.851e-10                | 3.524e-15          |
| Actinoptery | T1R ~ T2R + Genome size | BUSCO90 | 0.02473                 | 0.083513      | 0.007731      | /                        | 0.005096           |
| Actinoptery | T1R ~ T2R * Genome size | BUSCO90 | 0.02333                 | 0.17700       | 0.04967       | 0.44883                  | 0.01144            |
| Mammalia    | OLR ~ TR + Genome size  | BUSCO90 | 0.1238                  | 1.92e-11      | 0.7441        | /                        | 6.39e-11           |
| Mammalia    | OLR ~ TR * Genome size  | BUSCO90 | 0.1213                  | 0.1560        | 0.8596        | 0.9583                   | 3.688e-10          |
| Actinoptery | OLR ~ TR + Genome size  | BUSCO90 | 0.1311                  | 1.644e-10     | 0.03801       | /                        | 1.362e-11          |
| Actinoptery | OLR ~ TR * Genome size  | BUSCO90 | 0.1307                  | 7.7e-06       | 0.04501       | 0.35867                  | 5.368e-11          |
| Aves        | OLR ~ TR + Genome size  | BUSCO90 | 0.1454                  | 1.378e-10     | 0.2144        | /                        | 8.282e-12          |
| Aves        | OLR ~ TR * Genome size  | BUSCO90 | 0.166                   | 4.574e-05     | 0.005403      | 0.003057                 | 7.346e-13          |

**Supplementary Table 3 | BayesTraits analysis of *T1R* gene loss in mammals.** Three models were tested for each *T1R* gene (*T1R1*, *T1R2*, *T1R3*). Model 1 corresponds to an independent evolution of the gene and of the diet preference, model 2 corresponds to a dependent evolution of the gene and the diet preference, and model 3 corresponds to an evolution of the gene depending on diet preference, but not the other way around. In the three models tested, the transition rate of *T1R2* from 0 to 1 (from pseudogene to functional gene) was set to 0 (alpha1 for the model1 and q13 + q24 for model2 and model3). In model3, transition rates from carnivorous to herbivorous/omnivorous were forced to be equal, irrespective of whether *T1R2* was functional or not, just as the transition rates from herbivorous/omnivorous to carnivorous (q12 = q34, q21 = q43). The log-likelihood (10,000 runs of the maximum likelihood algorithm) given by BayesTraits for the three models, as well as all the parameters values, are displayed. Log-likelihood ratio test to compare Model 2 and Model 3 to Model 1 are also displayed. Model 2 and Model 3 were not significantly better than the Model 1 for *T1R1* and *T1R3*. Model 2 and Model 3 were both significantly better than model 1 for *T1R2*, with the transition rate from a functional *T1R2* gene to a non-functional *T1R2* gene being higher in carnivores than in herbivores/omnivores (q42 > q31).

Model 1 - Independent evolution of T1R1 and diet preference

| Lh          | alpha1   | beta1    | alpha2   | beta2    | Root - P(0,0) | Root - P(0,1) | Root - P(1,0) | Root - P(1,1) |
|-------------|----------|----------|----------|----------|---------------|---------------|---------------|---------------|
| -202.370602 | 0.000000 | 0.003313 | 0.003255 | 0.008835 | 0.000000      | 0.000000      | 0.143021      | 0.856979      |

Model 2 - Dependent evolution of T1R1 and diet preference

| Lh          | q12      | q13      | q21      | q24      | q31      | q34      | q42      | q43      | Root - P(0,0) | Root - P(0,1) | Root - P(1,0) | Root - P(1,1) |
|-------------|----------|----------|----------|----------|----------|----------|----------|----------|---------------|---------------|---------------|---------------|
| -200.906832 | 0.016352 | 0.000000 | 0.000000 | 0.000000 | 0.003552 | 0.004905 | 0.002673 | 0.013110 | 0.000000      | 0.000000      | 0.385670      | 0.614330      |

Model 3 - Evolution of T1R1 dependent on the diet preference

| Lh          | q12      | q13      | q21      | q24      | q31      | q34      | q42      | q43      | Root - P(0,0) | Root - P(0,1) | Root - P(1,0) | Root - P(1,1) |
|-------------|----------|----------|----------|----------|----------|----------|----------|----------|---------------|---------------|---------------|---------------|
| -202.216733 | 0.003345 | 0.000000 | 0.008886 | 0.000000 | 0.002997 | 0.003345 | 0.004044 | 0.008886 | 0.000000      | 0.000000      | 0.182840      | 0.817160      |

Model 2 vs Model 1  
Model 3 vs Model 1

Log BF = 2(-200.906832 - -202.370602) = 2.92754  
Log BF = 2(-202.216733 - -202.370602) = 0.307738

p-value (3df) = 0.4029325  
p-value (1df) = 0.5790716

Model 1 - Independent evolution of T1R2 and diet preference

| Lh          | alpha1   | beta1    | alpha2   | beta2    | Root - P(0,0) | Root - P(0,1) | Root - P(1,0) | Root - P(1,1) |
|-------------|----------|----------|----------|----------|---------------|---------------|---------------|---------------|
| -207.910576 | 0.000000 | 0.003238 | 0.003255 | 0.008835 | 0.000000      | 0.000000      | 0.143013      | 0.856987      |

Model 2 - Dependent evolution of T1R2 and diet preference

| Lh          | q12      | q13      | q21      | q24      | q31      | q34      | q42      | q43      | Root - P(0,0) | Root - P(0,1) | Root - P(1,0) | Root - P(1,1) |
|-------------|----------|----------|----------|----------|----------|----------|----------|----------|---------------|---------------|---------------|---------------|
| -199.294351 | 0.031542 | 0.000000 | 0.003249 | 0.000000 | 0.001902 | 0.003470 | 0.006493 | 0.011544 | 0.000000      | 0.000000      | 0.382606      | 0.617394      |

Model 3 - Evolution of T1R2 dependent on the diet preference

| Lh          | q12      | q13      | q21      | q24      | q31      | q34      | q42      | q43      | Root - P(0,0) | Root - P(0,1) | Root - P(1,0) | Root - P(1,1) |
|-------------|----------|----------|----------|----------|----------|----------|----------|----------|---------------|---------------|---------------|---------------|
| -202.907138 | 0.003719 | 0.000000 | 0.009015 | 0.000000 | 0.001549 | 0.003719 | 0.007261 | 0.009015 | 0.000000      | 0.000000      | 0.417552      | 0.582448      |

Model 2 vs Model 1  
Model 3 vs Model 1

Log BF = 2(-199.294351 - -207.910576) = 17.23245  
Log BF = 2(-202.907138 - -207.910576) = 10.00688

p-value (3df) = 0.0006330509  
p-value (1df) = 0.001559565

Model 1 - Independent evolution of T1R3 and diet preference

| Lh          | alpha1   | beta1    | alpha2   | beta2    | Root - P(0,0) | Root - P(0,1) | Root - P(1,0) | Root - P(1,1) |
|-------------|----------|----------|----------|----------|---------------|---------------|---------------|---------------|
| -208.202037 | 0.000000 | 0.002803 | 0.003255 | 0.008835 | 0.000000      | 0.000000      | 0.143019      | 0.856981      |

Model 2 - Dependent evolution of T1R3 and diet preference

| Lh          | q12      | q13      | q21      | q24      | q31      | q34      | q42      | q43      | Root - P(0,0) | Root - P(0,1) | Root - P(1,0) | Root - P(1,1) |
|-------------|----------|----------|----------|----------|----------|----------|----------|----------|---------------|---------------|---------------|---------------|
| -204.727261 | 0.042161 | 0.000000 | 0.000626 | 0.000000 | 0.004006 | 0.003047 | 0.000768 | 0.009596 | 0.000000      | 0.000000      | 0.080975      | 0.919025      |

Model 3 - Evolution of T1R3 dependent on the diet preference

| Lh          | q12      | q13      | q21      | q24      | q31      | q34      | q42      | q43      | Root - P(0,0) | Root - P(0,1) | Root - P(1,0) | Root - P(1,1) |
|-------------|----------|----------|----------|----------|----------|----------|----------|----------|---------------|---------------|---------------|---------------|
| -207.599065 | 0.003192 | 0.000000 | 0.008762 | 0.000000 | 0.003339 | 0.003192 | 0.001782 | 0.008762 | 0.000000      | 0.000000      | 0.105178      | 0.894822      |

Model 2 vs Model 1  
Model 3 vs Model 1

Log BF = 2(-204.727261 - -208.202037) = 6.949552  
Log BF = 2(-207.599065 - -208.202037) = 1.205944

p-value (3df) = 0.07352322  
p-value (1df) = 0.2721369

**Supplementary Table 4 | Contingency tables for *TIR* gene losses in mammals.** These contingency tables were used to infer whether or not the number of *TIR* gene losses (for *TIR1*, *TIR2* and *TIR3*) is significantly different between diet categories. Theoretical examples are shown in the Supplementary Fig. 28. Both one-sided Chi-squared test and one-sided Fisher's exact test *P*-values are reported. Significant correlations were only found for *TIR2*, with more loss events in carnivores than in herbivores and omnivores. This stays true when removing cetacean and pinnipeds from the analysis. *TIR* genes loss event numbers were based on shared LoF (loss-of-function) mutations.

|           | T1R1 intact | T1R1 loss event |
|-----------|-------------|-----------------|
| Carnivore | 138         | 8               |
| Herbivore | 328         | 9               |
| Omnivore  | 131         | 5               |

Chi-squared test p.value = 0.3085  
Fisher's Exact Test p.value = 0.3023

|           | T1R2 intact | T1R2 loss event |
|-----------|-------------|-----------------|
| Carnivore | 129         | 17              |
| Herbivore | 347         | 6               |
| Omnivore  | 145         | 2               |

Chi-squared test p.value = 2.183e-07  
Fisher's Exact Test p.value = 2.9e-06

Removing Pinnipeds and Cetacean clades :

|           | T1R2 intact | T1R2 loss event |
|-----------|-------------|-----------------|
| Carnivore | 127         | 13              |
| Herbivore | 347         | 6               |
| Omnivore  | 145         | 2               |

Chi-squared test p.value = 3.725e-05  
Fisher's Exact Test p.value = 0.0001818

|           | T1R3 intact | T1R3 loss event |
|-----------|-------------|-----------------|
| Carnivore | 176         | 6               |
| Herbivore | 346         | 9               |
| Omnivore  | 141         | 6               |

Chi-squared test p.value = 0.6446  
Fisher's Exact Test p.value = 0.558

**Supplementary Table 5 | Blastp results for cartilaginous fish *T2R* genes against the NCBI nr database.** Results of blastp results are shown with or without cartilaginous fish sequences. The best matches of all these *T2R* genes are *T2R* genes found in *S. canicula* and *P. pectinata* (annotated in their reference genome assemblies). When removing Chondrichthyes sequences (taxid:7777) from the nr database, all the best matches were *T2R* genes from the coelacanth.

### Blastp against NCBI NR database

| Query                                                                                      | Match accession | Match description                                               | Query cover (%) | E-value   | Perc Identity (%) |
|--------------------------------------------------------------------------------------------|-----------------|-----------------------------------------------------------------|-----------------|-----------|-------------------|
| Ginglymostoma_cirratum---<br>JAHRHZ010000132.1-202980-2039<br>93---1_exons---phobius-tmhmm | XP_038632475.1  | taste receptor type 2 member<br>13-like [Scyliorhinus canicula] | 100             | 4,00E-109 | 55.62             |
| Stegostoma_fasciatum---<br>CM039255.1-41488116-41489120-<br>---1_exons---phobius-tmhmm     | XP_038632475.1  | taste receptor type 2 member<br>13-like [Scyliorhinus canicula] | 100             | 3,00E-105 | 55.03             |
| Rhincodon_typus---<br>CM038826.1-278077-279270---1_<br>exons---phobius-tmhmm               | XP_038632475.1  | taste receptor type 2 member<br>13-like [Scyliorhinus canicula] | 81              | 4,00E-112 | 58.33             |
| Chiloscyllium_plagiosum---<br>CM012986.1-4461908-4462924---<br>1_exons---phobius-tmhmm     | XP_038632475.1  | taste receptor type 2 member<br>13-like [Scyliorhinus canicula] | 94              | 6,00E-112 | 59.01             |
| Chiloscyllium_punctatum---<br>BEZZ01000514.1-303085-304101-<br>---1_exons---phobius-tmhmm  | XP_038632475.1  | taste receptor type 2 member<br>13-like [Scyliorhinus canicula] | 94              | 1,00E-113 | 59.56             |
| Hemisicyllium_ocellatum---<br>CM036686.1-43667640-43668656-<br>---1_exons---phobius-tmhmm  | XP_038632475.1  | taste receptor type 2 member<br>13-like [Scyliorhinus canicula] | 94              | 9,00E-117 | 59.94             |
| Scyliorhinus_torazame---<br>BFAA01014499.1-26256-27266---<br>1_exons---phobius-tmhmm       | XP_038632475.1  | taste receptor type 2 member<br>13-like [Scyliorhinus canicula] | 100             | 0         | 89.02             |
| Scyliorhinus_canicula---<br>LR744047.1-71451999-71453033-<br>---1_exons---phobius-tmhmm    | XP_038632475.1  | taste receptor type 2 member<br>13-like [Scyliorhinus canicula] | 100             | 0         | 100               |
| Pristis_pectinata---<br>CM019896.1-3658922-3659917---<br>1_exons---phobius-tmhmm           | XP_051864870.1  | taste receptor type 2 member<br>143 [Pristis pectinata]         | 100             | 0         | 100               |

### Blastp against NCBI NR database excluding Chondrichthyes (taxid:7777)

| Query                                                                                      | Match accession | Match description                                             | Query cover | E-value  | Perc Identity |
|--------------------------------------------------------------------------------------------|-----------------|---------------------------------------------------------------|-------------|----------|---------------|
| Ginglymostoma_cirratum---<br>JAHRHZ010000132.1-202980-2039<br>93---1_exons---phobius-tmhmm | XP_006014041.1  | taste receptor type 2 member<br>40-like [Latimeria chalumnae] | 87          | 7,00E-16 | 28.71         |
| Stegostoma_fasciatum---<br>CM039255.1-41488116-41489120-<br>---1_exons---phobius-tmhmm     | XP_006010403.1  | taste receptor type 2 member<br>40-like [Latimeria chalumnae] | 87          | 3,00E-13 | 26.20         |
| Rhincodon_typus---<br>CM038826.1-278077-279270---1_<br>exons---phobius-tmhmm               | XP_006010403.1  | taste receptor type 2 member<br>40-like [Latimeria chalumnae] | 74          | 2,00E-17 | 27.74         |
| Chiloscyllium_plagiosum---<br>CM012986.1-4461908-4462924---<br>1_exons---phobius-tmhmm     | XP_006010403.1  | taste receptor type 2 member<br>40-like [Latimeria chalumnae] | 87          | 7,00E-15 | 27.04         |
| Chiloscyllium_punctatum---<br>BEZZ01000514.1-303085-304101-<br>---1_exons---phobius-tmhmm  | XP_006010403.1  | taste receptor type 2 member<br>40-like [Latimeria chalumnae] | 87          | 3,00E-17 | 27.92         |
| Hemisicyllium_ocellatum---<br>CM036686.1-43667640-43668656-<br>---1_exons---phobius-tmhmm  | XP_006010403.1  | taste receptor type 2 member<br>40-like [Latimeria chalumnae] | 87          | 4,00E-16 | 27.69         |
| Scyliorhinus_torazame---<br>BFAA01014499.1-26256-27266---<br>1_exons---phobius-tmhmm       | XP_006014041.1  | taste receptor type 2 member<br>40-like [Latimeria chalumnae] | 88          | 5,00E-17 | 30.23         |
| Scyliorhinus_canicula---<br>LR744047.1-71451999-71453033-<br>---1_exons---phobius-tmhmm    | XP_006014041.1  | taste receptor type 2 member<br>40-like [Latimeria chalumnae] | 86          | 2,00E-15 | 30.23         |
| Pristis_pectinata---<br>CM019896.1-3658922-3659917---<br>1_exons---phobius-tmhmm           | XP_006007462.2  | taste receptor type 2 member<br>40-like [Latimeria chalumnae] | 87          | 1,00E-12 | 25.66         |

**Supplementary Table 6 | Blastp results for bird *VIR* genes against the NCBI nr database.** Results of blastp searches between complete *VIR* genes retrieved in birds against the NCBI nr database are shown, with or without bird sequences (taxid:8782). With the complete database, the same best match was found for all genes. This match was the *VIR* gene we found in *G. californianus* (annotated in its reference genome assembly). In the second blastp search, all best matches were *VIR* genes from lizards or turtles.

### Blastp against NCBI NR database

| Query                                                                            | Match accession | Match description                                                | Query cover (%) | E-value   | Perc Identity (%) |
|----------------------------------------------------------------------------------|-----------------|------------------------------------------------------------------|-----------------|-----------|-------------------|
| Pelecanus_crispus---<br>JJRG01012536.1-6398-7351---1_exons---phobius             | XP_050751436.1  | vomeronasal type-1 receptor<br>92-like [Gymnogyps californianus] | 85              | 1,00E-160 | 83.39             |
| Recurvirostra_avosetta---<br>SAY001028558.1-95480-96460---1_exons---phobius      | XP_050751436.1  | vomeronasal type-1 receptor<br>92-like [Gymnogyps californianus] | 82              | 8,00E-165 | 86.35             |
| Charadrius_alexandrinus---<br>VUYV01000244.1-1075064-1076044---1_exons---phobius | XP_050751436.1  | vomeronasal type-1 receptor<br>92-like [Gymnogyps californianus] | 82              | 3,00E-168 | 85.98             |
| Balaeniceps_rex---<br>VYZW01041512.1-4739-5722---1_exons---phobius               | XP_050751436.1  | vomeronasal type-1 receptor<br>92-like [Gymnogyps californianus] | 82              | 3,00E-161 | 83.82             |
| Pluvialis_apricaria---<br>CM030010.1-39778926-39779906---1_exons---phobius-tmhmm | XP_050751436.1  | vomeronasal type-1 receptor<br>92-like [Gymnogyps californianus] | 82              | 2,00E-178 | 90.41             |
| Gymnogyps_californianus---<br>CM030805.1-2929681-2930661---1_exons---phobius     | XP_050751436.1  | vomeronasal type-1 receptor<br>92-like [Gymnogyps californianus] | 82              | 0,00E+00  | 100               |
| Podiceps_cristatus---<br>KL284334.1-10240-11064---1_exons                        | XP_050751436.1  | vomeronasal type-1 receptor<br>92-like [Gymnogyps californianus] | 84              | 3,00E-127 | 79.57             |
| Himantopus_leucocephalus---<br>RSEF01000004.1-96440577-96441515---1_exons        | XP_050751436.1  | vomeronasal type-1 receptor<br>92-like [Gymnogyps californianus] | 71              | 2,00E-120 | 78.17             |
| Himantopus_himantopus---<br>VXBK01010287.1-455584-456522---1_exons               | XP_050751436.1  | vomeronasal type-1 receptor<br>92-like [Gymnogyps californianus] | 71              | 6,00E-118 | 77.29             |

### Blastp against NCBI NR database excluding Birds (taxid:8782)

| Query                                                                            | Match accession | Match description                                                      | Query cover (%) | E-value   | Perc Identity (%) |
|----------------------------------------------------------------------------------|-----------------|------------------------------------------------------------------------|-----------------|-----------|-------------------|
| Pelecanus_crispus---<br>JJRG01012536.1-6398-7351---1_exons---phobius             | XP_048364726.1  | vomeronasal type-1 receptor<br>92-like [Sphaerodactylus townsendi]     | 98              | 4,00E-145 | 64.58             |
| Recurvirostra_avosetta---<br>SAY001028558.1-95480-96460---1_exons---phobius      | XP_048364726.1  | vomeronasal type-1 receptor<br>92-like [Sphaerodactylus townsendi]     | 94              | 1,00E-151 | 68.81             |
| Charadrius_alexandrinus---<br>VUYV01000244.1-1075064-1076044---1_exons---phobius | XP_048364726.1  | vomeronasal type-1 receptor<br>92-like [Sphaerodactylus townsendi]     | 96              | 3,00E-153 | 67.81             |
| Balaeniceps_rex---<br>VYZW01041512.1-4739-5722---1_exons---phobius               | XP_048364726.1  | vomeronasal type-1 receptor<br>92-like [Sphaerodactylus townsendi]     | 94              | 2,00E-147 | 67.31             |
| Pluvialis_apricaria---<br>CM030010.1-39778926-39779906---1_exons---phobius-tmhmm | XP_048364726.1  | vomeronasal type-1 receptor<br>92-like [Sphaerodactylus townsendi]     | 94              | 3,00E-165 | 73.14             |
| Gymnogyps_californianus---<br>CM030805.1-2929681-2930661---1_exons---phobius     | XP_048364726.1  | vomeronasal type-1 receptor<br>92-like [Sphaerodactylus townsendi]     | 94              | 1,00E-157 | 69.90             |
| Podiceps_cristatus---<br>KL284334.1-10240-11064---1_exons                        | XP_024049569.1  | vomeronasal type-1 receptor<br>A14-like [Terrapene carolina triunguis] | 82              | 4,00E-96  | 63.76             |
| Himantopus_leucocephalus---<br>RSEF01000004.1-96440577-96441515---1_exons        | XP_048364726.1  | vomeronasal type-1 receptor<br>92-like [Sphaerodactylus townsendi]     | 76              | 8,00E-119 | 71.90             |
| Himantopus_himantopus---<br>VXBK01010287.1-455584-456522---1_exons               | XP_048364726.1  | vomeronasal type-1 receptor<br>92-like [Sphaerodactylus townsendi]     | 76              | 1,00E-115 | 70.25             |

**Supplementary Table 7 | Ecological parameters for mammals, birds and ray-finned fishes.** For each chemoreceptor families, we performed a two-sided pGLS between the number of complete genes against each ecological variable (see Supplementary Data 1).

|                | Predictor               | Source      | Type                                                                                                                                                                                                                                                                                                                                                                                                                                                                                                                                                                                                                        | Description                                                                                                                                                                                                                                                                                                                                                                                                                                                                                                                                                                                                                                                                                                                                                                                                                                                                                                                                                                                                                                                                                                                                                                                                                                                                                                                                                                                            |
|----------------|-------------------------|-------------|-----------------------------------------------------------------------------------------------------------------------------------------------------------------------------------------------------------------------------------------------------------------------------------------------------------------------------------------------------------------------------------------------------------------------------------------------------------------------------------------------------------------------------------------------------------------------------------------------------------------------------|--------------------------------------------------------------------------------------------------------------------------------------------------------------------------------------------------------------------------------------------------------------------------------------------------------------------------------------------------------------------------------------------------------------------------------------------------------------------------------------------------------------------------------------------------------------------------------------------------------------------------------------------------------------------------------------------------------------------------------------------------------------------------------------------------------------------------------------------------------------------------------------------------------------------------------------------------------------------------------------------------------------------------------------------------------------------------------------------------------------------------------------------------------------------------------------------------------------------------------------------------------------------------------------------------------------------------------------------------------------------------------------------------------|
| Actinopterygii | AnaCat                  | fishbase    | Discrete                                                                                                                                                                                                                                                                                                                                                                                                                                                                                                                                                                                                                    | non-migratory;oceanodromous;potamodromous;anadromous;amphidromous;catadromous;oceano-estuarine                                                                                                                                                                                                                                                                                                                                                                                                                                                                                                                                                                                                                                                                                                                                                                                                                                                                                                                                                                                                                                                                                                                                                                                                                                                                                                         |
|                | DemersPelag             | fishbase    | Discrete                                                                                                                                                                                                                                                                                                                                                                                                                                                                                                                                                                                                                    | benthopelagic;demersal;pelagic;reef-associated;pelagic-oceanic;pelagic-neritic;bathypelagic;bathydemersal                                                                                                                                                                                                                                                                                                                                                                                                                                                                                                                                                                                                                                                                                                                                                                                                                                                                                                                                                                                                                                                                                                                                                                                                                                                                                              |
|                | DepthRangeDeep          | fishbase    | Continuous                                                                                                                                                                                                                                                                                                                                                                                                                                                                                                                                                                                                                  | Living depth                                                                                                                                                                                                                                                                                                                                                                                                                                                                                                                                                                                                                                                                                                                                                                                                                                                                                                                                                                                                                                                                                                                                                                                                                                                                                                                                                                                           |
|                | EnvTemp                 | fishbase    | Discrete                                                                                                                                                                                                                                                                                                                                                                                                                                                                                                                                                                                                                    | Climate zone. boreal;deep-water;high altitude;polar;subtropical;temperate;tropical                                                                                                                                                                                                                                                                                                                                                                                                                                                                                                                                                                                                                                                                                                                                                                                                                                                                                                                                                                                                                                                                                                                                                                                                                                                                                                                     |
|                | Habitat                 | fishbase    | Discrete                                                                                                                                                                                                                                                                                                                                                                                                                                                                                                                                                                                                                    | Possible values : Fresh_Brack_Salt;Fresh_Brack;Salt_Brack;Fresh_Salt;Fresh;Brack,Salt                                                                                                                                                                                                                                                                                                                                                                                                                                                                                                                                                                                                                                                                                                                                                                                                                                                                                                                                                                                                                                                                                                                                                                                                                                                                                                                  |
|                | TempPreferred           | fishbase    | Continuous                                                                                                                                                                                                                                                                                                                                                                                                                                                                                                                                                                                                                  | Mean preferred temperature                                                                                                                                                                                                                                                                                                                                                                                                                                                                                                                                                                                                                                                                                                                                                                                                                                                                                                                                                                                                                                                                                                                                                                                                                                                                                                                                                                             |
|                | Diet                    | fishbase    | Discrete                                                                                                                                                                                                                                                                                                                                                                                                                                                                                                                                                                                                                    | trophic level $\leq 2.19$ were classified as herbivores, species with a trophic level $\geq 2.2$ and $\leq 2.79$ were classified as omnivores while species with a trophic level $\geq 2.8$ were classified as carnivores                                                                                                                                                                                                                                                                                                                                                                                                                                                                                                                                                                                                                                                                                                                                                                                                                                                                                                                                                                                                                                                                                                                                                                              |
| Aves           | Migration               | AVONET      | Discrete                                                                                                                                                                                                                                                                                                                                                                                                                                                                                                                                                                                                                    | 1 = Sedentary. ; 2 = Partially migratory, i.e. minority of population migrates long distances, or most of population undergoes short-distance migration, nomadic movements, distinct altitudinal migration, etc.; 3 = Migratory, i.e. majority of population undertakes long-distance migration                                                                                                                                                                                                                                                                                                                                                                                                                                                                                                                                                                                                                                                                                                                                                                                                                                                                                                                                                                                                                                                                                                        |
|                | Trophic.Niche           | AVONET      | Discrete                                                                                                                                                                                                                                                                                                                                                                                                                                                                                                                                                                                                                    | Frugivore = species obtaining at least 60% of food resources from fruit; Granivore = species obtaining at least 60% of food resources from seeds or nuts; Nectarivore = species obtaining at least 60% of food resources from nectar; Herbivore = species obtaining at least 60% of food resources from other plant materials in non-aquatic systems, including leaves, buds, whole flowers etc.; Herbivore aquatic = species obtaining at least 60% of food resources from plant materials in aquatic systems, including algae and aquatic plant leaves; Invertivore = species obtaining at least 60% of food resources from invertebrates in terrestrial systems, including insects, worms, arachnids, etc.; Vertivore = species obtaining at least 60% of food resources from vertebrate animals in terrestrial systems, including mammals, birds, reptiles etc.; Aquatic Predator = species obtaining at least 60% of food resources from vertebrate and invertebrate animals in aquatic systems, including fish, crustacea, molluscs, etc; Scavenger = species obtaining at least 60% of food resources from carrion, offal or refuse; Omnivore = Species using multiple niches, within or across trophic levels, in relatively equal proportions                                                                                                                                                 |
|                | Diet                    | AVONET      | Discrete                                                                                                                                                                                                                                                                                                                                                                                                                                                                                                                                                                                                                    | Herbivore = species obtaining at least 70% of food resources from plants; Carnivore = species obtaining at least 70% of food resources by consuming live invertebrate or vertebrate animals; Omnivore = species obtaining resources from multiple trophic level in roughly equal proportion. Scavenger species were classified as carnivores                                                                                                                                                                                                                                                                                                                                                                                                                                                                                                                                                                                                                                                                                                                                                                                                                                                                                                                                                                                                                                                           |
|                | Habitat.Density         | AVONET      | Discrete                                                                                                                                                                                                                                                                                                                                                                                                                                                                                                                                                                                                                    | 1 = Dense habitats. Species primarily lives in the lower or middle storey of forest, or in dense thickets, dense shrubland etc.; 2 = Semi-open habitats. Species primarily lives in open shrubland, scattered bushes, parkland, low dry or deciduous forest, thorn forest. ; 3 = Open habitats. Species primarily lives in desert, grassland, open water, low shrubs, rocky habitats, seashores, cities. Also applies to species living mainly on top of forest canopy (i.e. mostly in the open)                                                                                                                                                                                                                                                                                                                                                                                                                                                                                                                                                                                                                                                                                                                                                                                                                                                                                                       |
|                | Habitat                 | AVONET      | Discrete                                                                                                                                                                                                                                                                                                                                                                                                                                                                                                                                                                                                                    | Desert (= drylands and other open arid habitats, often sandy with very sparse vegetation); Rock (= rocky substrate typically with no or very little vegetation, including rocky outcrops, rocky coastlines, arid stony steppes, rocky mountaintops and mountain slopes); Grassland (= open dry to moist grass-dominated landscapes, at all elevations); Shrubland (= low stature bushy habitats, included thornscrub, thorny or arid savanna, caatinga, xerophytic shrubland and coastal scrub); Woodland (= medium stature tree-dominated habitats, including Acacia woodland, riparian woodlands, mangrove forests, forest edges, also more open parkland with scattered taller trees); Forest (= tall tree-dominated vegetation with more or less closed canopy, including palm forest); Human modified (urban landscapes, intensive agriculture, gardens); Wetland (= wide range of freshwater aquatic habitats including lakes, marshes, swamps and reedbeds); Riverine (= associated with rivers and streams at all elevations); Coastal (= intertidal zones within immediate vicinity of beaches, estuaries, brackish to salty marshes, including mudflats, lagoons, alkaline wetlands, coastal dunes and harbours); Marine (= pelagic, on sea near coasts, including species in the intertidal zone on beaches, and those pelagic species nesting near the sea on cliffs, islets and islands). |
|                | Primary.Lifestyle       | AVONET      | Discrete                                                                                                                                                                                                                                                                                                                                                                                                                                                                                                                                                                                                                    | Aerial = species spends much of the time in flight, and hunts or forages predominantly on the wing; Terrestrial = species spends majority of its time on the ground, where it obtains food while either walking or hopping (note this includes species that also wade in water with their body raised above the water); Insectorial = species spends much of the time perching above the ground, either in branches of trees and other vegetation (i.e. arboreal), or on other raised substrates including rocks, buildings, posts, and wires; Aquatic = species spends much of the time sitting on water, and obtains food while afloat or when diving under the water's surface; Generalist = species has no primary lifestyle because it spends time in different lifestyle classes                                                                                                                                                                                                                                                                                                                                                                                                                                                                                                                                                                                                                 |
|                | ActivityCycle           | Pantheria   | Discrete                                                                                                                                                                                                                                                                                                                                                                                                                                                                                                                                                                                                                    | Activity cycle of each species measured for non-captive populations; adult or age unspecified individuals, male, female, or sex unspecified individuals; primary, secondary, or extrapolated sources Species were defined as (1) nocturnal only, (2) nocturnal/crepuscular, cathemeral, crepuscular or diurnal/crepuscular and (3) diurnal only.                                                                                                                                                                                                                                                                                                                                                                                                                                                                                                                                                                                                                                                                                                                                                                                                                                                                                                                                                                                                                                                       |
| Mammals        | ForStrat.Value          | Elton       | Discrete                                                                                                                                                                                                                                                                                                                                                                                                                                                                                                                                                                                                                    | M - marine, G - ground level, including aquatic foraging (see ForStrat-Comment), S- scansorial, Ar - arboreal, A- aerial.                                                                                                                                                                                                                                                                                                                                                                                                                                                                                                                                                                                                                                                                                                                                                                                                                                                                                                                                                                                                                                                                                                                                                                                                                                                                              |
|                | HomeRange_In div_km2    | Pantheria   | Continuous                                                                                                                                                                                                                                                                                                                                                                                                                                                                                                                                                                                                                  | Size of the area within which everyday activities of individuals are typically restricted, estimated by either direct observation, radio telemetry, trapping or unspecified methods over any duration of time, using non-captive populations; male, female, or sex unspecified individuals; primary, secondary, or extrapolated sources; all measures of central tendency; in all localities                                                                                                                                                                                                                                                                                                                                                                                                                                                                                                                                                                                                                                                                                                                                                                                                                                                                                                                                                                                                           |
|                | HomeRange_km2           | Pantheria   | Continuous                                                                                                                                                                                                                                                                                                                                                                                                                                                                                                                                                                                                                  | $\ln(\text{home range}) = \text{species} + \text{sex} + \text{estimation method} + \text{range measure [across class]}$                                                                                                                                                                                                                                                                                                                                                                                                                                                                                                                                                                                                                                                                                                                                                                                                                                                                                                                                                                                                                                                                                                                                                                                                                                                                                |
|                | MaxLongevity_m          | Pantheria   | Continuous                                                                                                                                                                                                                                                                                                                                                                                                                                                                                                                                                                                                                  | Maximum adult age measured either through direct observation, capture-recapture estimates, projected from physical wear or unspecified, using captive, wild, provisioned, or unspecified populations; male, female, or sex unspecified individuals; primary, secondary, or extrapolated sources; in all localities.                                                                                                                                                                                                                                                                                                                                                                                                                                                                                                                                                                                                                                                                                                                                                                                                                                                                                                                                                                                                                                                                                    |
|                | PopulationDensity_n.km2 | Pantheria   | Continuous                                                                                                                                                                                                                                                                                                                                                                                                                                                                                                                                                                                                                  | $\ln(\text{population density}) = \text{species} + \text{estimation method} + \text{study area type [across class]}$                                                                                                                                                                                                                                                                                                                                                                                                                                                                                                                                                                                                                                                                                                                                                                                                                                                                                                                                                                                                                                                                                                                                                                                                                                                                                   |
|                | PopulationGrpSize       | Pantheria   | Continuous                                                                                                                                                                                                                                                                                                                                                                                                                                                                                                                                                                                                                  | Number of individuals, adults or definition unspecified in a group that spends the majority of their time in a 24 hour cycle together, measured over any duration of time, using non-captive populations; male, female, or sex unspecified individuals; primary, secondary, or extrapolated sources; all measures of central tendency; in all localities.                                                                                                                                                                                                                                                                                                                                                                                                                                                                                                                                                                                                                                                                                                                                                                                                                                                                                                                                                                                                                                              |
|                | Diet                    | Mammal Diet | Discrete                                                                                                                                                                                                                                                                                                                                                                                                                                                                                                                                                                                                                    | Species were defined as (1) herbivore (not vertebrate and/or invertebrate), (2) omnivore (vertebrate and/or invertebrate plus any of the other categories) and (3) carnivore (vertebrate and/or invertebrate only)                                                                                                                                                                                                                                                                                                                                                                                                                                                                                                                                                                                                                                                                                                                                                                                                                                                                                                                                                                                                                                                                                                                                                                                     |
| WeaningAge_d   | Pantheria               | Continuous  | Age when primary nutritional dependency on the mother ends and independent foraging begins to make a major contribution to the offspring's energy requirements, measured as either weaning/lactation length, nutritionally independent, first solid food, last observed nursing, age at first flight (bats only), age at pouch exit or length of teat Attachment (marsupials only) or unspecified definition, using captive, wild, provisioned, or unspecified populations; male, female, or sex unspecified individuals; primary, secondary, or extrapolated sources; all measures of central tendency; in all localities. |                                                                                                                                                                                                                                                                                                                                                                                                                                                                                                                                                                                                                                                                                                                                                                                                                                                                                                                                                                                                                                                                                                                                                                                                                                                                                                                                                                                                        |





**Supplementary Fig. 2 | Low BUSCO scores in agnathan genomes. a,** Number of common fragmented/missing genes predicted by BUSCO in the five agnathan genomes. **b,** Distribution of the number of common fragmented/missing genes expected at random, considering gene lengths (red) or not (blue). The mean number of extracted genes in common was 208 and 69 when considering the gene length or not, respectively, which is much less than the observed 1,014 genes. We thus hypothesize that these low scores are a consequence of applying the *vertebrata\_odb10* database, which may have been built without taking into consideration, or with an underrepresentation, of agnathan species. Source data are provided as a Source Data file.

**a**

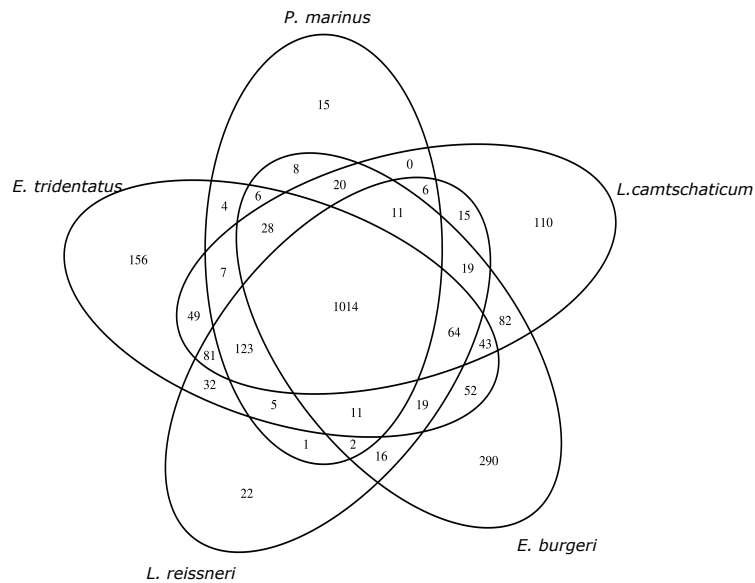

**b**

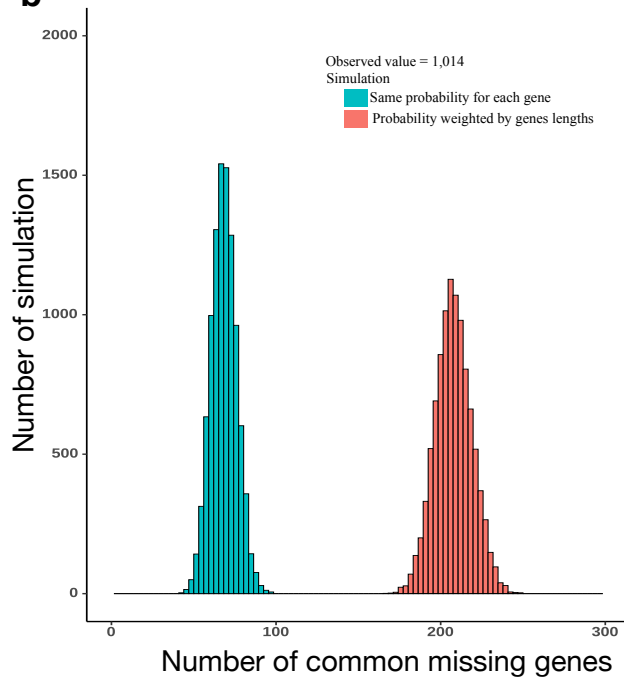

**Supplementary Fig. 3 | The case of *Sceloporus occidentalis*.** DNA percentage identity between lepidosaurs chemoreceptors and their best blastn match among amphibian chemoreceptors. Boxplot showing the DNA identity for each lepidosaur species (BUSCO80 dataset) per *OR* (a), *TAAR* (c), *VIR* (e), *V2R* (g), *T1R* (i), *T2R* (k) and for *S. occidentalis* and close species (*Sceloporus tristichus*, *Sceloporus undulatus* and *Phrynosoma platyrhinos*) per *OR* (b), *TAAR* (d), *VIR* (f), *V2R* (h), *T1R* (j), *T2R* (l); species are missing if no blastn match (e-value < 10) was found. The colors of the dots correspond to the chemoreceptor subclade. Chemoreceptors in subclades that are only present in *S. occidentalis* always have a very high DNA identity with amphibian chemoreceptors. All these blastn results and pairwise DNA identity values are reported in Supplementary Data 1. Source data are provided as a Source Data file.

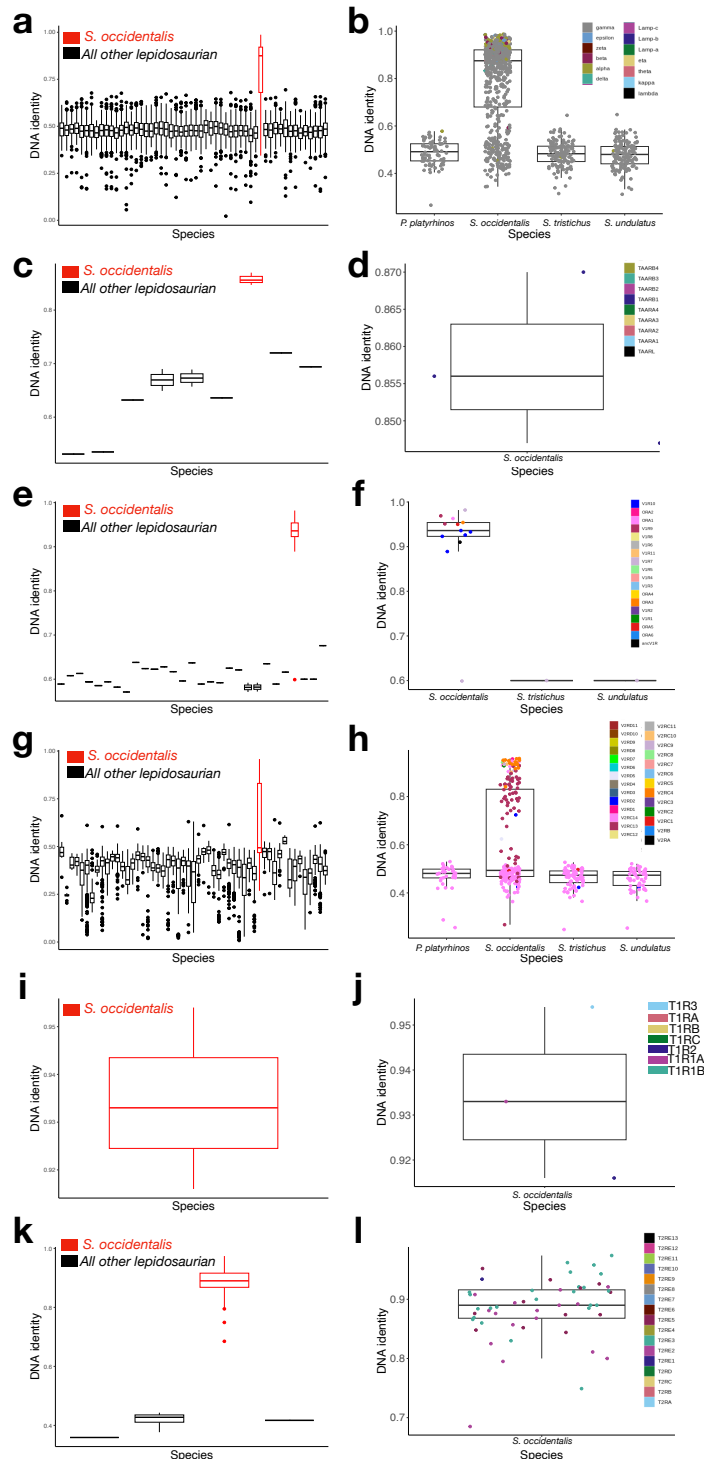

**Supplementary Fig. 4 | Comparison between previous studies and this work regarding the number of chemoreceptor genes retrieved from genome assemblies. a, OR genes; b, TAAR genes; c, VIR genes; d, V2R genes; e, T1R genes; f, T2R genes.** Pearson correlation coefficients and  $P$ -values are indicated for each comparison. The solid black lines represent the linear regression lines and the grey area represents confidence intervals. Dashed lines indicate slope = 1. In order not to underestimate the number of genes from previous studies, we only considered studies in which both the number of functional and the number of pseudogenes were reported. Since the different studies used different criteria to differentiate between incomplete and complete genes, we only compared the total number of genes (complete and incomplete genes). The only exception was *Neoceratodus forsteri*, for which we only retrieved the number of functional genes, but we considered that this species was of a particular interest given its phylogenetic position. Thus, for this species, the numbers reported below only correspond to complete genes (in both axis). The numbers of OR genes retrieved in Christmas et al. 2023 are not included in this figure (see Supplementary Fig. 5). References of previous studies considered here and the number of genes are reported in Supplementary Data 1. Source data are provided as a Source Data file.

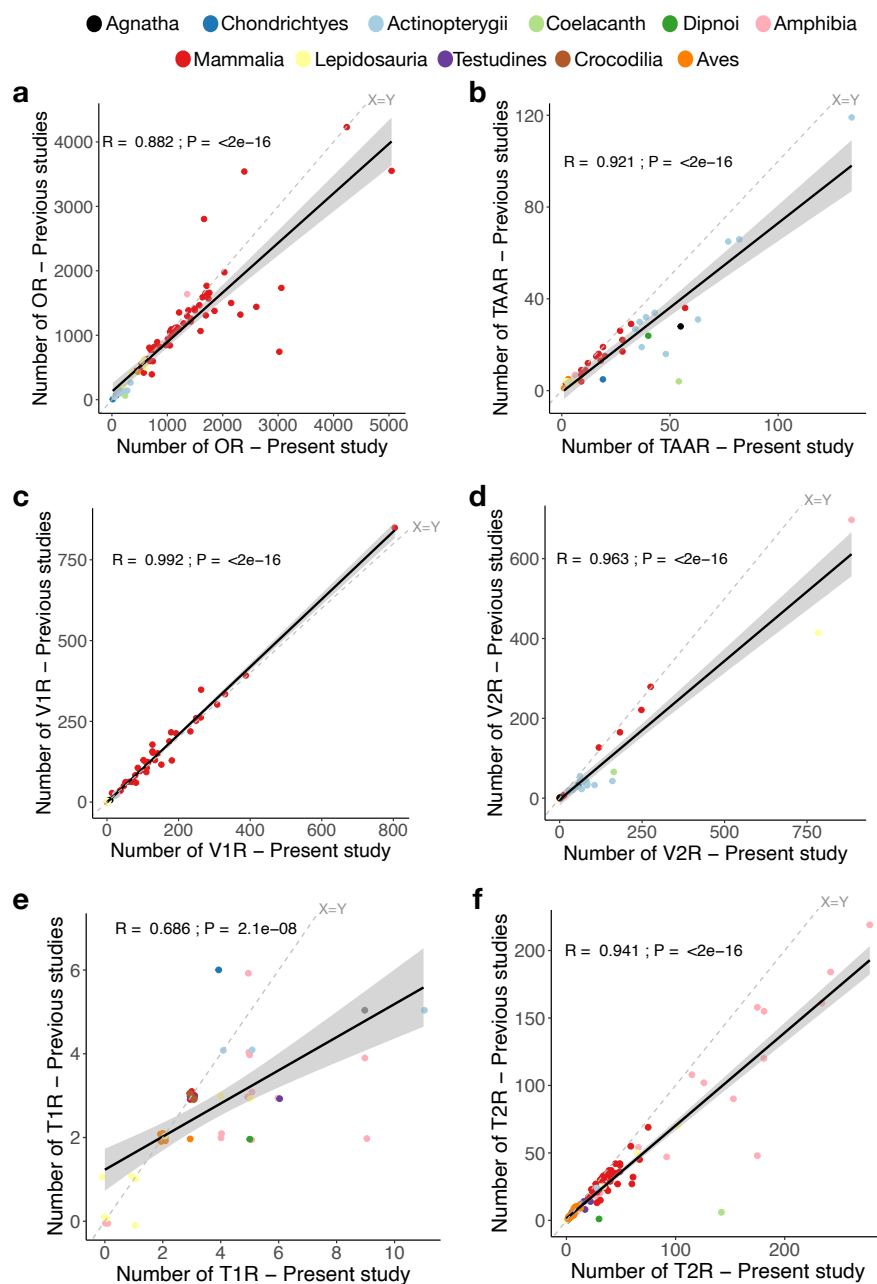

**Supplementary Fig. 5 | Comparison of the mammalian *OR* gene repertoire between Christmas et al. 2023 and our study.** Comparison of the number of *OR* genes retrieved in Christmas et al. 2023<sup>59</sup> and our study (n=249). **a**, Complete *OR* genes; **b**, Incomplete *OR* genes; **c**, Total *OR* genes. Pearson correlation coefficients and *P*-values are indicated for each comparison. The solid black lines represent the linear regression lines and the grey area represents confidence intervals. Dashed lines indicate slope = 1. **d**, Two-sided pGLS results between the number of total *OR* genes (this study) and the number of turbinals (Christmas et al. 2023) (BUSCO80 dataset, n=49). The pGLS  $R^2$ , *p*-value and  $\lambda$  are indicated. This correlation was even higher when considering the number of complete *OR* genes instead of the total number of *OR* genes (pGLS:  $R^2 = 0.37$ ,  $P = 3e-6$ ,  $\lambda=0.946$ ), but no correlation was found with TAAR, V1R or V2R genes. A blue point indicates that the same genome assembly was used in both studies, whereas a red point indicates that different genome assemblies for the same species were used in the two studies. The number of *OR* genes and the number of turbinals retrieved in Christmas et al. 2023 can be found in Supplementary Data 1. Source data are provided as a Source Data file.

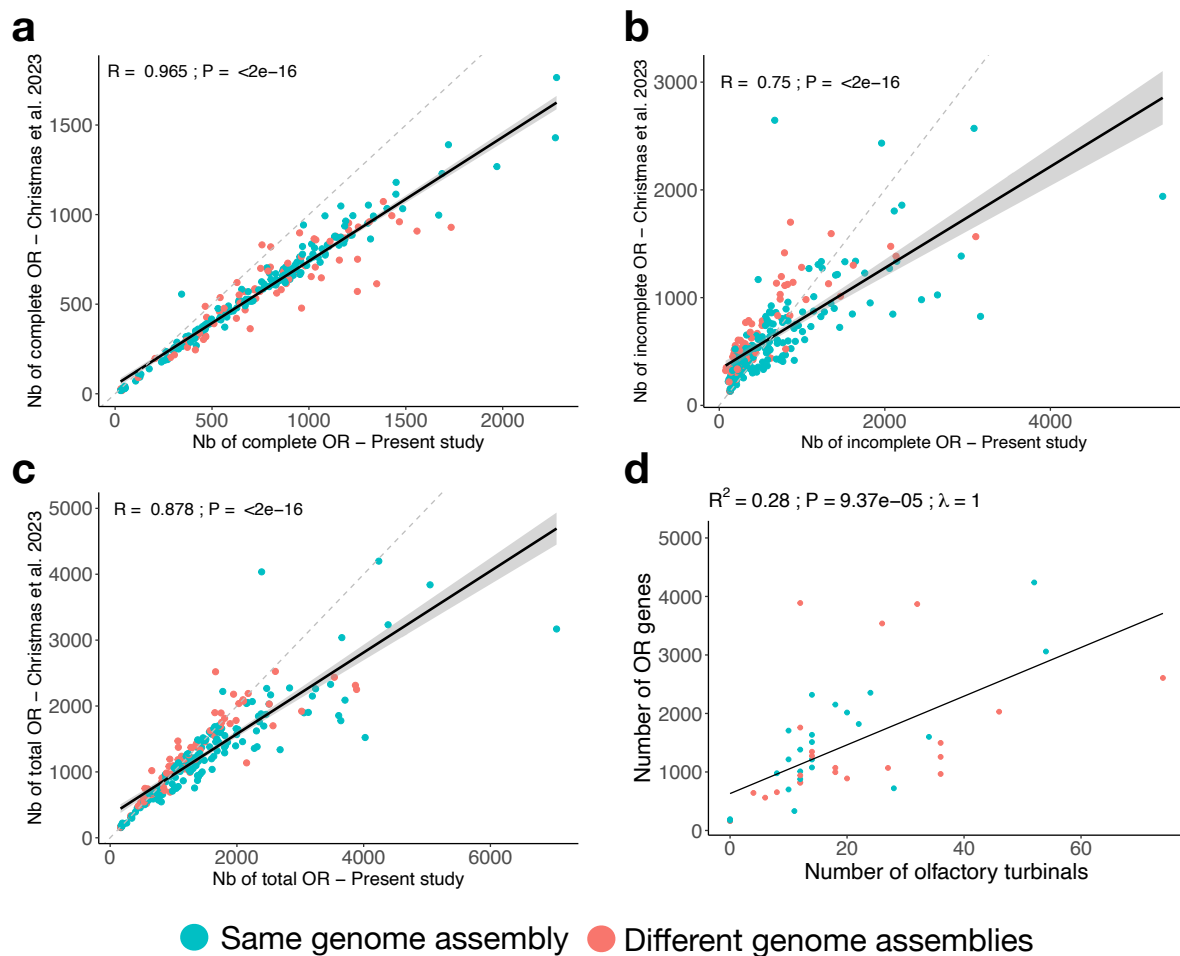

**Supplementary Fig. 6 | Correlations between the numbers of complete chemoreceptor genes across chemoreceptor families.** Correlations (BUSCO80 dataset) are shown for *OR* versus *TAAR* (a), *OR* versus *V2R* (b), *OR* versus *V1R* (c), *TAAR* versus *V2R* (d), *TAAR* versus *V1R* (e), *V1R* versus *V2R* (f), between the two taste receptor families *T1R* and *T2R* (g), between the number of complete olfactory receptors (OLR) and the number of complete taste receptors (TR) (h), and between *V1R* and *V2R* of mammals that have at least one *V1R* and one *V2R* (i). Phylogenetic linear regression lines, as well as their slope-intercept equation, R-squared and P-values are shown with the colors associated to the species classes (only reported if significant). Dashed lines represent slope = 1. The number of chemoreceptors per species can be found in Supplementary Data 1. Source data are provided as a Source Data file.

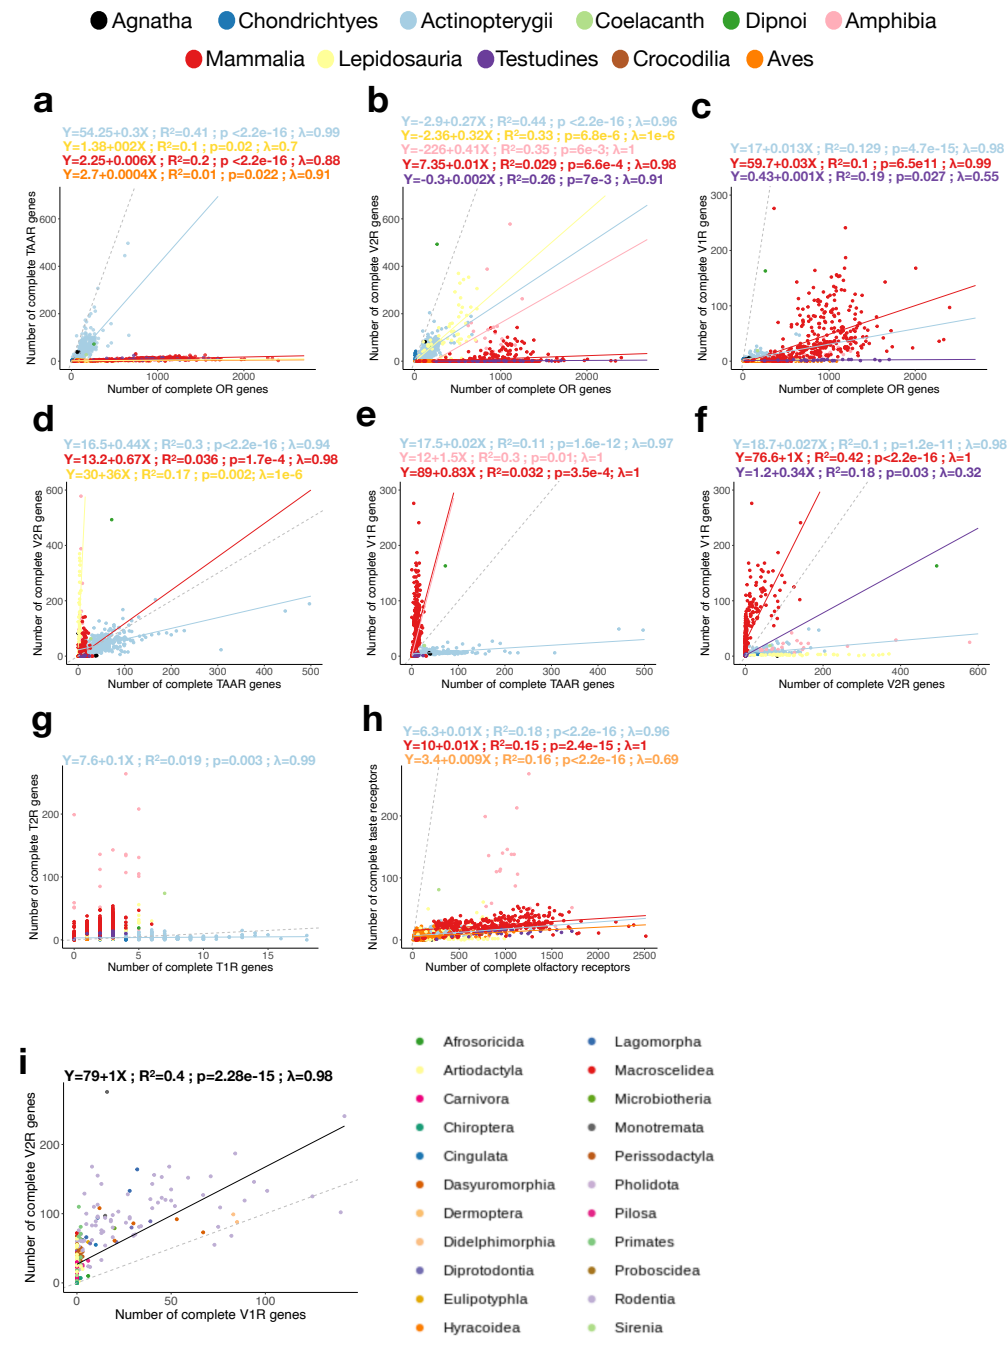

**Supplementary Fig. 7 | Summary of correlations between the number of complete genes across chemoreceptor families.** Correlations were assessed using a two-sided pGLS test. **a**, Results from the BUSCO80 dataset (also shown in Fig. 1b). **b**, Results from the BUSCO90 dataset. **c**, Results when considering only chromosome-scale assemblies for ray-finned fishes, mammals and birds. Presence of a circle indicates  $P_{\text{pGLS}} < 0.05$  and the circle is colored according to the pGLS  $R^2$ -value. Correlations observed in mammals, birds and ray-finned fishes hold true when taking only chromosome-scale assemblies into account ( $N = 126$ ,  $N = 83$  and  $N = 210$  respectively), except for the correlation between *OR* and *V2R* genes in mammals, for which the  $P$ -value become non-significant (pGLS:  $P = 0.09$ ,  $R^2 = 0.2$ ). Source data are provided as a Source Data file.

### a) BUSCO80

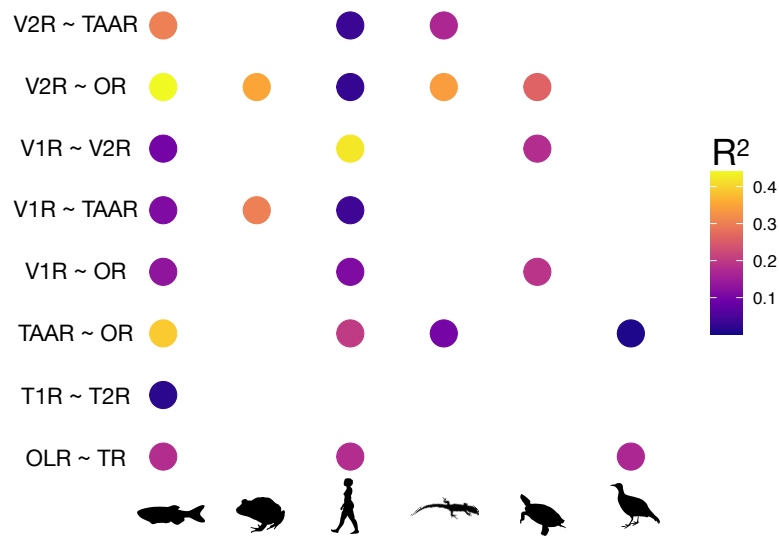

### b) BUSCO90

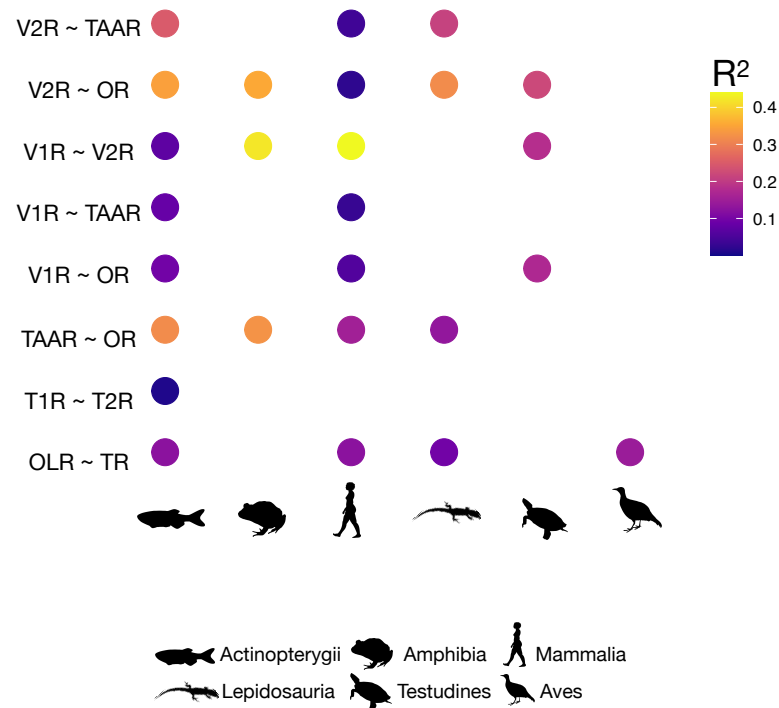

### c) Chromosome-scale assemblies

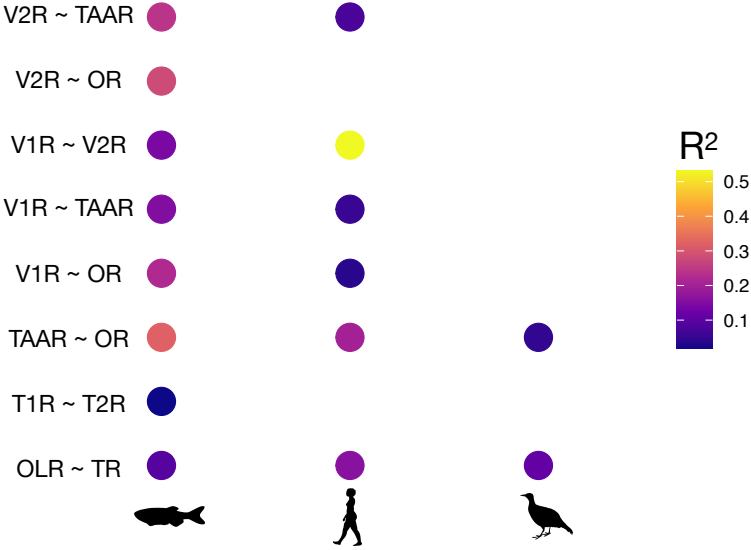



**Supplementary Fig. 8 | Correlations between the number of chemoreceptors and genome size (BUSCO80).** Two-sided pGLS results between the number of complete genes or the total number of genes (complete genes and incomplete genes) in each chemoreceptor gene family and genome size (in Mb) are shown for the BUSCO80 dataset. Significant correlations ( $P_{\text{PGLS}} < 0.05$ ) are highlighted in green. The number of complete and total genes was significantly correlated to the genome size for all chemoreceptor families in birds, mammals and ray-finned fishes, except for the *V2R* family of mammals, but pGLS  $R^2$ -values were low (close or below 0.1). Thus, correlation between gene numbers across chemoreceptor families were re-computed taking the genome size into account (see Supplementary Table. 2). We removed *Tachyglossus aculeatus* from the pGLS analysis between the total number of *OR* genes and genome size, as we retrieved 8,952 incomplete genes in this species, far more than in any other mammal, which most likely results from an assembly artifact. In a blastx search against the NCBI nr database, all these incomplete genes best matched with known *OR* genes. Source data are provided as a Source Data file.

## BUSCO80



| Response      | R <sup>2</sup> | pvalue | lambda | regression         |
|---------------|----------------|--------|--------|--------------------|
| Complete OR   | 0.013          | 0.022  | 0.99   | Y= 0.076 + 945.98  |
| Total OR      | 0.016          | 0.0112 | 0.99   | Y= 0.144X + 862.16 |
| Complete TAAR | 0.023          | 0.34   | 0.89   | Y= 0.001X + 7.81   |
| Total TAAR    | 0.072          | 0.0927 | 0.88   | Y= 0.002X + 8.58   |
| Complete V1R  | 0.004          | 0.209  | 1      | Y= 0.004X + 85.58  |
| Total V1R     | 0.014          | 0.0179 | 1      | Y= 0.02X + 263.67  |
| Complete V2R  | 0.0016         | 0.425  | 0.98   | Y= 0.002X + 14.71  |
| Total V2R     | 0.0018         | 0.398  | 1      | Y= 0.006X + 73.13  |
| Complete T2R  | 0.023          | 0.342  | 0.98   | Y= 0.001X + 16.44  |
| Total T2R     | 0.0058         | 0.131  | 0.98   | Y= 0.002X + 25.94  |

  

| Response variable | R <sup>2</sup> | pvalue   | lambda | regression          |
|-------------------|----------------|----------|--------|---------------------|
| Complete OR       | 2.6e-05        | 0.971    | 1      | Y= -0.003X + 391.14 |
| Total OR          | 0.012          | 0.439    | 1      | Y= 0.06X + 310.42   |
| Complete TAAR     | 0.018          | 0.338    | 0.8    | Y= 0X + 3.27        |
| Total TAAR        | 0.0046         | 0.632    | 0.67   | Y= 0X + 4           |
| Complete V1R      | 0.035          | 0.185    | 0      | Y= 0X + 1.98        |
| Total V1R         | 0.053          | 0.1      | 0.66   | Y= 0X + 2.09        |
| Complete V2R      | 0.021          | 0.303    | 0.33   | Y= -0.037X + 172    |
| Total V2R         | 0.005          | 0.618    | 0.21   | Y= -0.037X + 273.18 |
| Complete T2R      | 0.11           | 0.0178   | 1      | Y= 0.009X + -4.05   |
| Total T2R         | 0.2            | 0.000996 | 1      | Y= 0.019X + -14.36  |

  

| Response variable | R <sup>2</sup> | pvalue   | lambda | regression         |
|-------------------|----------------|----------|--------|--------------------|
| Complete OR       | 0.047          | 3.25e-06 | 0.96   | Y= 0.043X + 219.82 |
| Total OR          | 0.072          | 7.03e-09 | 0.97   | Y= 0.068X + 243.09 |
| Complete TAAR     | 0.051          | 1.5e-06  | 1      | Y= 0.023X + 101.36 |
| Total TAAR        | 0.076          | 2.89e-09 | 1      | Y= 0.043X + 149.84 |
| Complete V1R      | 0.025          | 0.000833 | 0.98   | Y= 0.001X + 18.81  |
| Total V1R         | 0.067          | 2.44e-08 | 0.99   | Y= 0.002X + 20.04  |
| Complete V2R      | 0.016          | 0.00718  | 0.93   | Y= 0.01X + 60.81   |
| Total V2R         | 0.037          | 4.1e-05  | 0.94   | Y= 0.018X + 63.71  |
| Complete T1R      | 0.023          | 0.00137  | 0.89   | Y= 0.001X + 3.86   |
| Total T1R         | 0.033          | 0.000112 | 0.94   | Y= 0.002X + 4.21   |
| Complete T2R      | 0.042          | 1.1e-05  | 0.99   | Y= 0.001X + 5.7    |
| Total T2R         | 0.13           | 3.77e-15 | 0.98   | Y= 0.003X + 5.49   |

  

| Response variable | R <sup>2</sup> | pvalue | lambda | regression          |
|-------------------|----------------|--------|--------|---------------------|
| Complete OR       | 0.05           | 0.273  | 0.59   | Y= 0.48X + -97.56   |
| Total OR          | 0.11           | 0.0988 | 0      | Y= 0.942X + -674.42 |
| Complete TAAR     | 0.00087        | 0.887  | 0.96   | Y= -0.001X + 12.47  |
| Total TAAR        | 0.082          | 0.156  | 0.49   | Y= 0.01X + -8.24    |
| Complete V1R      | 0.092          | 0.133  | 0.23   | Y= 0.002X + -1.93   |
| Total V1R         | 0.03           | 0.395  | 0.92   | Y= 0.001X + 1.3     |
| Complete V2R      | 0.017          | 0.529  | 1      | Y= -0.001X + 2.4    |
| Total V2R         | 0.0066         | 0.694  | 0.98   | Y= 0.001X + 1.14    |
| Complete T2R      | 0.0088         | 0.649  | 0.92   | Y= 0.002X + 5.86    |
| Total T2R         | 0.039          | 0.334  | 0      | Y= 0.007X + 5.85    |

  

| Response variable | R <sup>2</sup> | pvalue   | lambda | regression          |
|-------------------|----------------|----------|--------|---------------------|
| Complete OR       | 0.97           | 5.29e-12 | 0.55   | Y= 0.411X + -457.05 |
| Total OR          | 0.091          | 2.33e-11 | 0.5    | Y= 0.642X + -716.77 |
| Complete TAAR     | 0.0014         | 0.411    | 0.95   | Y= 0.001X + 2.41    |
| Total TAAR        | 0.034          | 0.204    | 0.86   | Y= 0.001X + 3.41    |
| Complete T2R      | 0.03           | 1.62e-04 | 0.69   | Y= 0.005X + -5.2    |
| Total T2R         | 0.03           | 1.41e-04 | 0.67   | Y= 0.006X + -4.72   |

  

| Response variable | R <sup>2</sup> | pvalue | lambda | regression          |
|-------------------|----------------|--------|--------|---------------------|
| Complete OR       | 0.02           | 0.566  | 0      | Y= 0.004X + 878.64  |
| Total OR          | 0.036          | 0.422  | 0      | Y= 0.007X + 1080.28 |
| Complete TAAR     | 0.25           | 0.0249 | 0      | Y= 0X + 4.26        |
| Total TAAR        | 0.016          | 0.596  | 0.9    | Y= 0X + 6.54        |
| Complete V1R      | 0.3            | 0.013  | 0.87   | Y= 0.001X + 13.4    |
| Total V1R         | 0.072          | 0.252  | 0.25   | Y= 0.001X + 20.13   |
| Complete V2R      | 0.011          | 0.663  | 0.65   | Y= -0.003X + 170.47 |
| Total V2R         | 0.00035        | 0.937  | 0.48   | Y= -0.001X + 329.07 |
| Complete T2R      | 0.033          | 0.447  | 0.96   | Y= 0.002X + 59.82   |
| Total T2R         | 0.087          | 0.207  | 0.95   | Y= 0.004X + 78.31   |

**Supplementary Fig. 9 | Correlations between the number of chemoreceptors and genome size (BUSCO90).** Two-sided pGLS results between the number of complete genes or the total number of genes (complete genes and incomplete genes) in each chemoreceptor gene family and genome size (in Mb) are shown for the BUSCO90 dataset. Significant correlations ( $P_{\text{PGLS}} < 0.05$ ) are highlighted in green. The number of complete and total genes was significantly correlated to the genome size for all chemoreceptor families in birds, mammals and ray-finned fishes, except for the *V2R* gene family in mammals, but pGLS  $R^2$ -values were low (close or below 0.1). Thus, correlation between gene numbers across chemoreceptor families were re-computed taking the genome size into account. As in Supplementary Fig. 1, *Tachyglossus aculeatus* was removed from the analysis due to the unusually high number of incomplete genes retrieved in its genome. In a blastx search against the NCBI nr database, all these incomplete genes best matched with known *OR* genes. Source data are provided as a Source Data file.

## BUSCO90

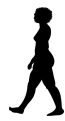

| Response variable | R <sup>2</sup> | pvalue  | lambda | regression          |
|-------------------|----------------|---------|--------|---------------------|
| Complete OR       | 0.21           | 0.00657 | 0.99   | Y = 0.097X + 892.2  |
| Total OR          | 0.03           | 0.00121 | 0.99   | Y = 0.199X + 707.4  |
| Complete TAAR     | 0.0048         | 0.2     | 0.88   | Y = 0.001X + 7.25   |
| Total TAAR        | 0.01           | 0.0588  | 0.87   | Y = 0.002X + 7.3    |
| Complete V1R      | 0.0093         | 0.0747  | 0.99   | Y = 0.006X + 80.2   |
| Total V1R         | 0.03           | 0.00126 | 1      | Y = 0.028X + 244.95 |
| Complete V2R      | 0.0099         | 0.0658  | 0.97   | Y = 0.004X + 8.26   |
| Total V2R         | 0.0071         | 0.119   | 1      | Y = 0.013X + 56.3   |
| Complete T2R      | 0.0033         | 0.289   | 0.99   | Y = 0.001X + 16.46  |
| Total T2R         | 0.022          | 0.00622 | 0.99   | Y = 0.003X + 21.82  |

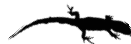

| Response variable | R <sup>2</sup> | pvalue | lambda | regression           |
|-------------------|----------------|--------|--------|----------------------|
| Complete OR       | 0.01           | 0.52   | 1      | Y = -0.053X + 516.23 |
| Total OR          | 4.8e-07        | 0.996  | 1      | Y = 0X + 459.28      |
| Complete TAAR     | 0.011          | 0.504  | 0.71   | Y = 0X + 2.97        |
| Total TAAR        | 0.00055        | 0.881  | 0.59   | Y = 0X + 3.12        |
| Complete V1R      | 0.042          | 0.189  | 0      | Y = 0X + 1.96        |
| Total V1R         | 0.004          | 0.688  | 1      | Y = 0X + 2.98        |
| Complete V2R      | 0.058          | 0.118  | 0.37   | Y = -0.06X + 225.01  |
| Total V2R         | 0.033          | 0.245  | 0.2    | Y = -0.085X + 388.58 |
| Complete T2R      | 0.037          | 0.214  | 1      | Y = 0.005X + 6.79    |
| Total T2R         | 0.14           | 0.0153 | 0.99   | Y = 0.016X + -4.58   |

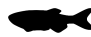

| Response variable | R <sup>2</sup> | pvalue   | lambda | regression          |
|-------------------|----------------|----------|--------|---------------------|
| Complete OR       | 0.029          | 0.00158  | 0.96   | Y = 0.031X + 244.3  |
| Total OR          | 0.051          | 2.4e-05  | 0.97   | Y = 0.052X + 272.01 |
| Complete TAAR     | 0.029          | 0.00164  | 1      | Y = 0.017X + 112.9  |
| Total TAAR        | 0.053          | 1.72e-05 | 1      | Y = 0.037X + 161.59 |
| Complete V1R      | 0.012          | 0.0427   | 0.97   | Y = 0.001X + 19.54  |
| Total V1R         | 0.037          | 0.000356 | 1      | Y = 0.001X + 21.29  |
| Complete V2R      | 0.0041         | 0.237    | 0.94   | Y = 0.005X + 70.93  |
| Total V2R         | 0.02           | 0.00898  | 0.95   | Y = 0.012X + 75.47  |
| Complete T1R      | 0.013          | 0.032    | 0.89   | Y = 0.001X + 4.45   |
| Total T1R         | 0.024          | 0.036    | 0.97   | Y = 0.001X + 4.76   |
| Complete T2R      | 0.022          | 0.00622  | 0.99   | Y = 0.003X + 21.82  |
| Total T2R         | 0.12           | 8.77e-11 | 0.99   | Y = 0.003X + 5.8    |

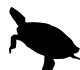

| Response variable | R <sup>2</sup> | pvalue | lambda | regression           |
|-------------------|----------------|--------|--------|----------------------|
| Complete OR       | 0.041          | 0.333  | 0.6    | Y = 0.438X + -2.64   |
| Total OR          | 0.11           | 0.109  | 0      | Y = 0.934X + -650.49 |
| Complete TAAR     | 0.00038        | 0.927  | 0.96   | Y = 0X + 10.22       |
| Total TAAR        | 0.072          | 0.194  | 0.46   | Y = 0.009X + -6.88   |
| Complete V1R      | 0.091          | 0.144  | 0.22   | Y = 0.002X + -1.92   |
| Total V1R         | 0.035          | 0.368  | 0.91   | Y = 0.001X + 1.1     |
| Complete V2R      | 0.065          | 0.219  | 1      | Y = -0.001X + 3.77   |
| Total V2R         | 0.0061         | 0.711  | 0.97   | Y = 0.001X + 1.11    |
| Complete T2R      | 0.0039         | 0.765  | 1      | Y = -0.001X + 11.46  |
| Total T2R         | 0.038          | 0.353  | 0      | Y = 0.007X + 6.26    |

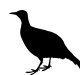

| Response variable | R <sup>2</sup> | pvalue   | lambda | regression           |
|-------------------|----------------|----------|--------|----------------------|
| Complete OR       | 0.11           | 2.83e-9  | 0.58   | Y = 0.417X + -402.6  |
| Total OR          | 0.12           | 5.04e-10 | 0.56   | Y = 0.635X + -613.86 |
| Complete TAAR     | 0.0007         | 0.641    | 1      | Y = 0.001X + 2.87    |
| Total TAAR        | 0.012          | 0.056    | 0.86   | Y = 0.001X + 3.15    |
| Complete T2R      | 0.028          | 0.0031   | 0.84   | Y = 0.005X + -4.16   |
| Total T2R         | 0.023          | 0.0074   | 0.77   | Y = 0.006X + -2.47   |

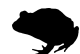

| Response variable | R <sup>2</sup> | pvalue | lambda | regression           |
|-------------------|----------------|--------|--------|----------------------|
| Complete OR       | 0.054          | 0.445  | 0      | Y = 0.03X + 787.14   |
| Total OR          | 5.9e-06        | 0.994  | 0      | Y = 0X + 1125.52     |
| Complete TAAR     | 0.011          | 0.731  | 1      | Y = 0X + 4.92        |
| Total TAAR        | 0.076          | 0.363  | 0.99   | Y = 0.001X + 4.53    |
| Complete V1R      | 0.0082         | 0.768  | 0.93   | Y = 0X + 15.52       |
| Total V1R         | 0.012          | 0.726  | 1      | Y = 0.002X + 24.08   |
| Complete V2R      | 0.041          | 0.508  | 1      | Y = -0.018X + 247.35 |
| Total V2R         | 0.0037         | 0.844  | 1      | Y = 0.007X + 365.49  |
| Complete T2R      | 0.015          | 0.689  | 0.99   | Y = 0.004X + 57.66   |
| Total T2R         | 0.019          | 0.656  | 0.97   | Y = 0.004X + 82.42   |

**Supplementary Fig. 10 | Phylogenies with full species names.** Vertebrate (sub)class phylogenies with species names displayed (BUSCO80 dataset). **a**, Agnatha; **b**, Chondrichthyes; **c**, Actinopterygii; **d**, Amphibia; **e**, Mammalia; **f**, Lepidosauria; **g**, Testudines; **h**, Aves and Crocrodilia. Terminal branches and species names are colored according to order based on the NCBI taxonomy database.

**a) Agnatha**

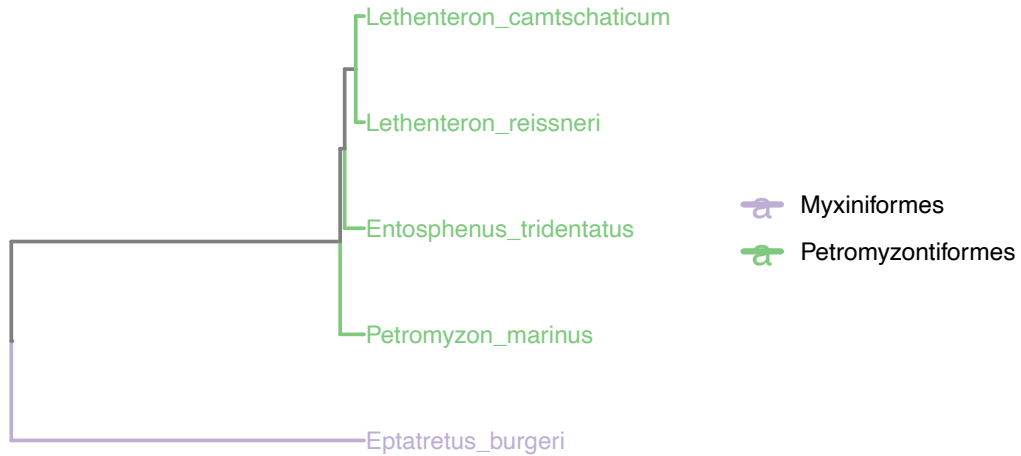

**b) Chondrichthyes**

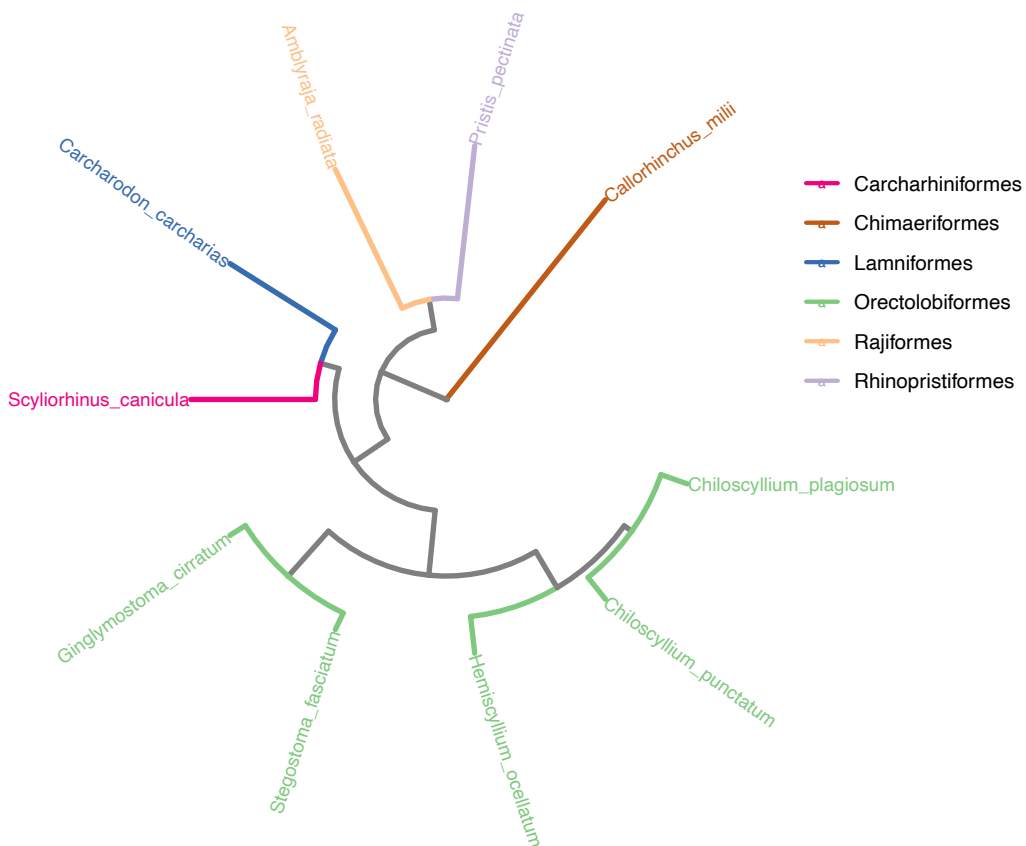

# c) Actinopterygii

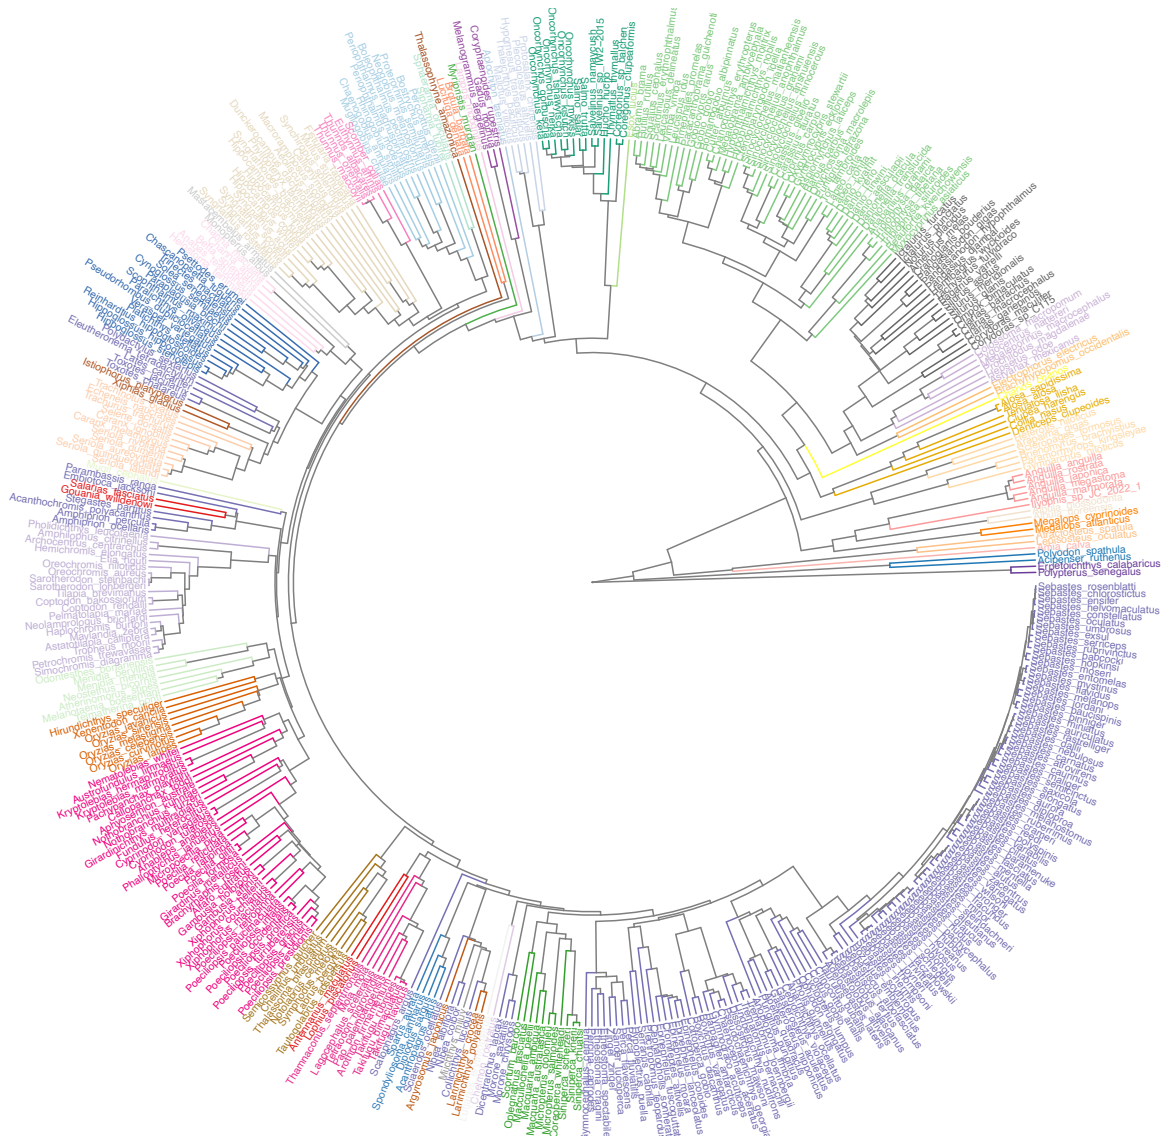

- Acanthuriformes
- Acipenseriformes
- Albuliformes
- Amiiformes
- Anabantiformes
- Anguilliformes
- Atheriniformes
- Batrachoidiformes
- Beloniformes
- Blenniiformes
- Carangiformes
- Centrarchiformes
- Chaetodontiformes
- Characiformes
- Cichliformes
- Clupeiformes
- Cypriniformes
- Cyprinodontiformes
- Elopiformes
- Esociformes
- Eupercaria
- Gadiformes
- Galaxiiformes
- Gobiiformes
- Gonorynchiformes
- Gymnotiformes
- Holocentiformes
- Istiophoriformes
- Kurtiformes
- Labriformes
- Lampriformes
- Lophiiformes
- Lutjaniformes
- Mugiliformes
- Ophidiiformes
- Osmeriformes
- Osteoglossiformes
- Perciformes
- Pleuronectiformes
- Polypteriformes
- Salmoniformes
- Scombriformes
- Semionotiformes
- Siluriformes
- Spariformes
- Synbranchiformes
- Syngnathiformes
- Tetraodontiformes

## d) Amphibia

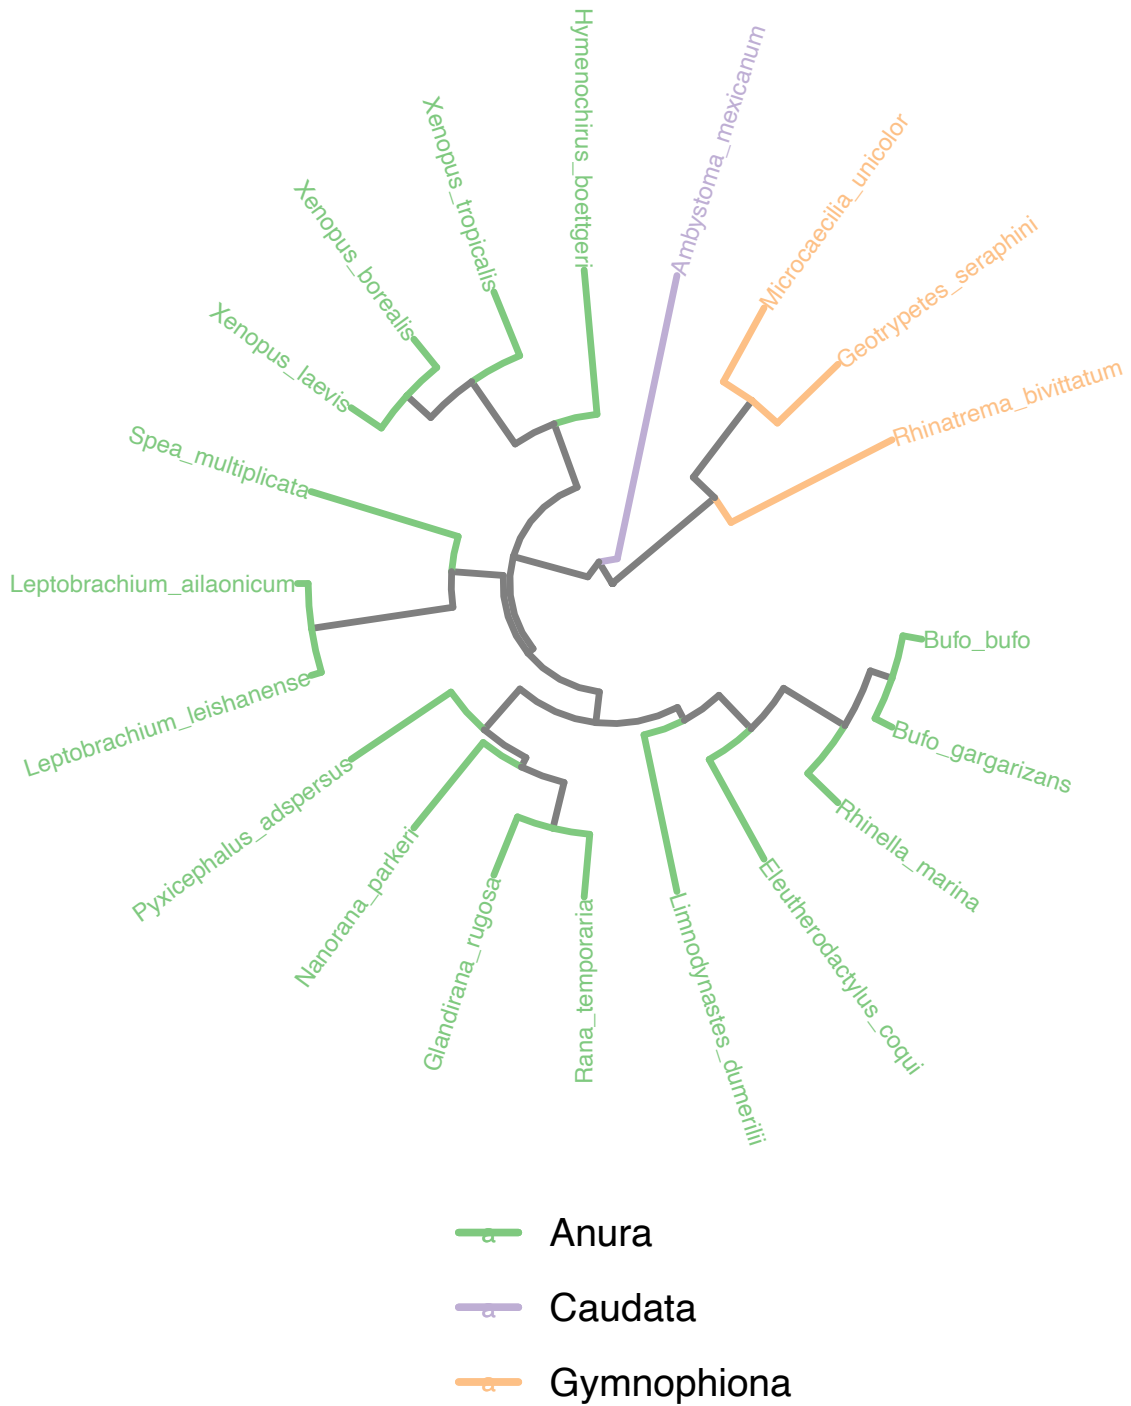

# e) Mammalia

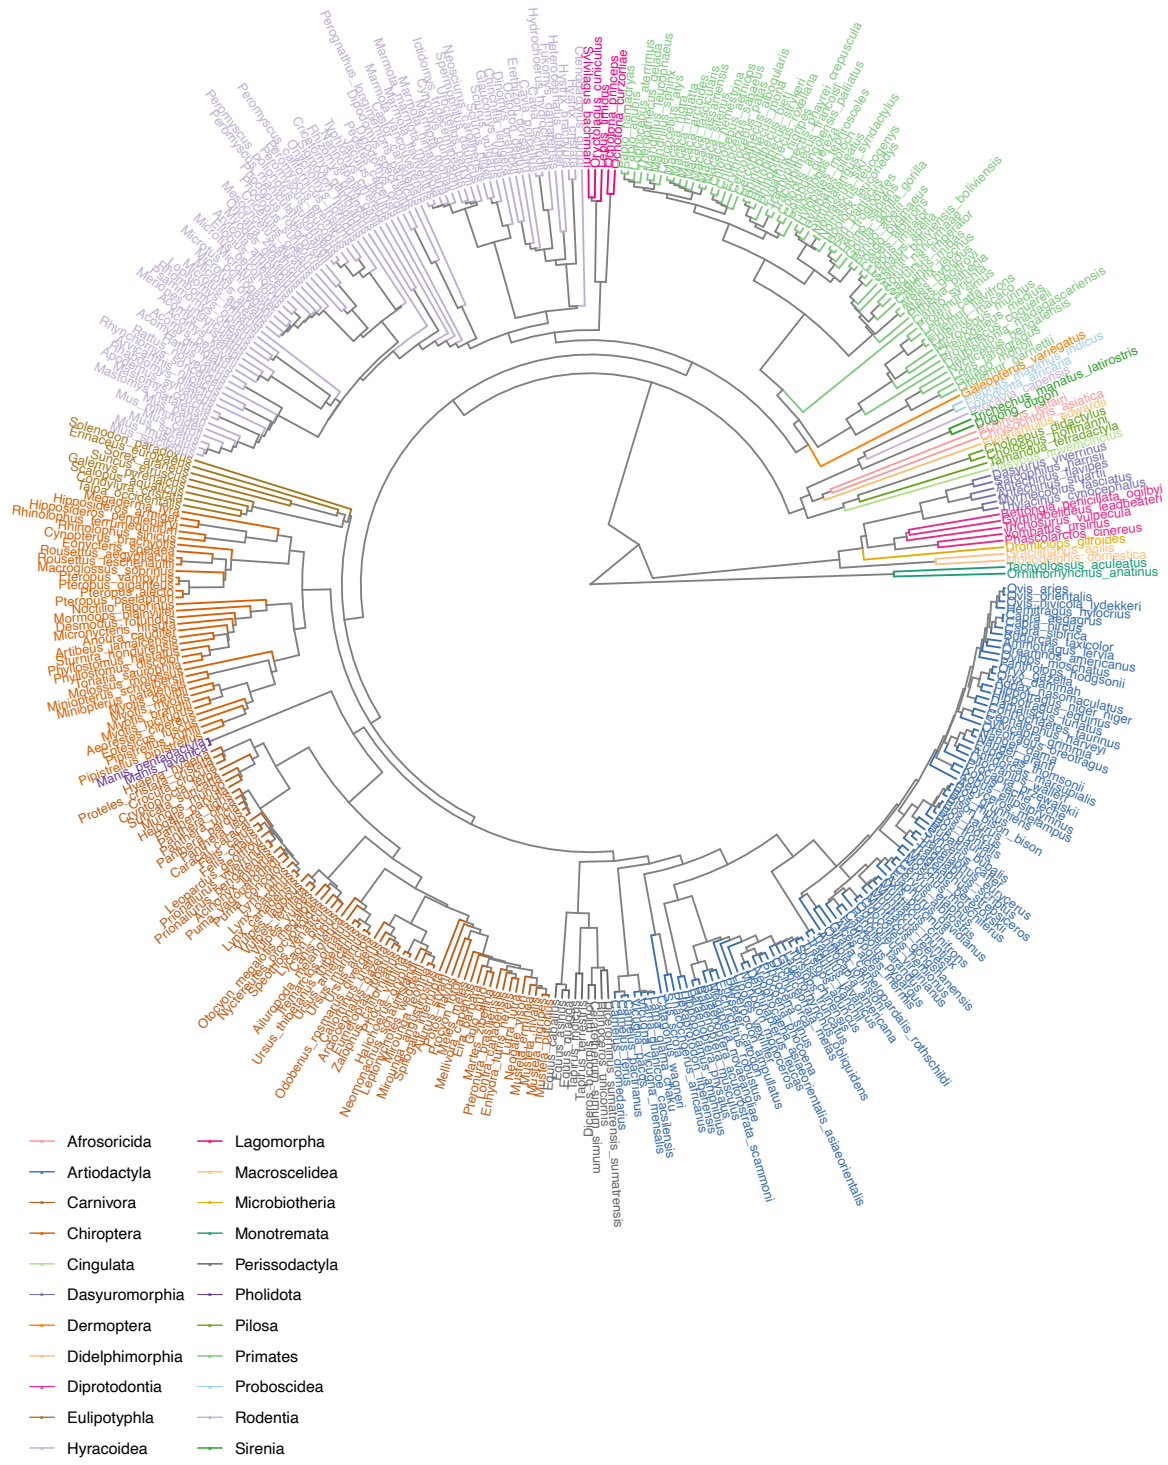

## f) Lepidosauria

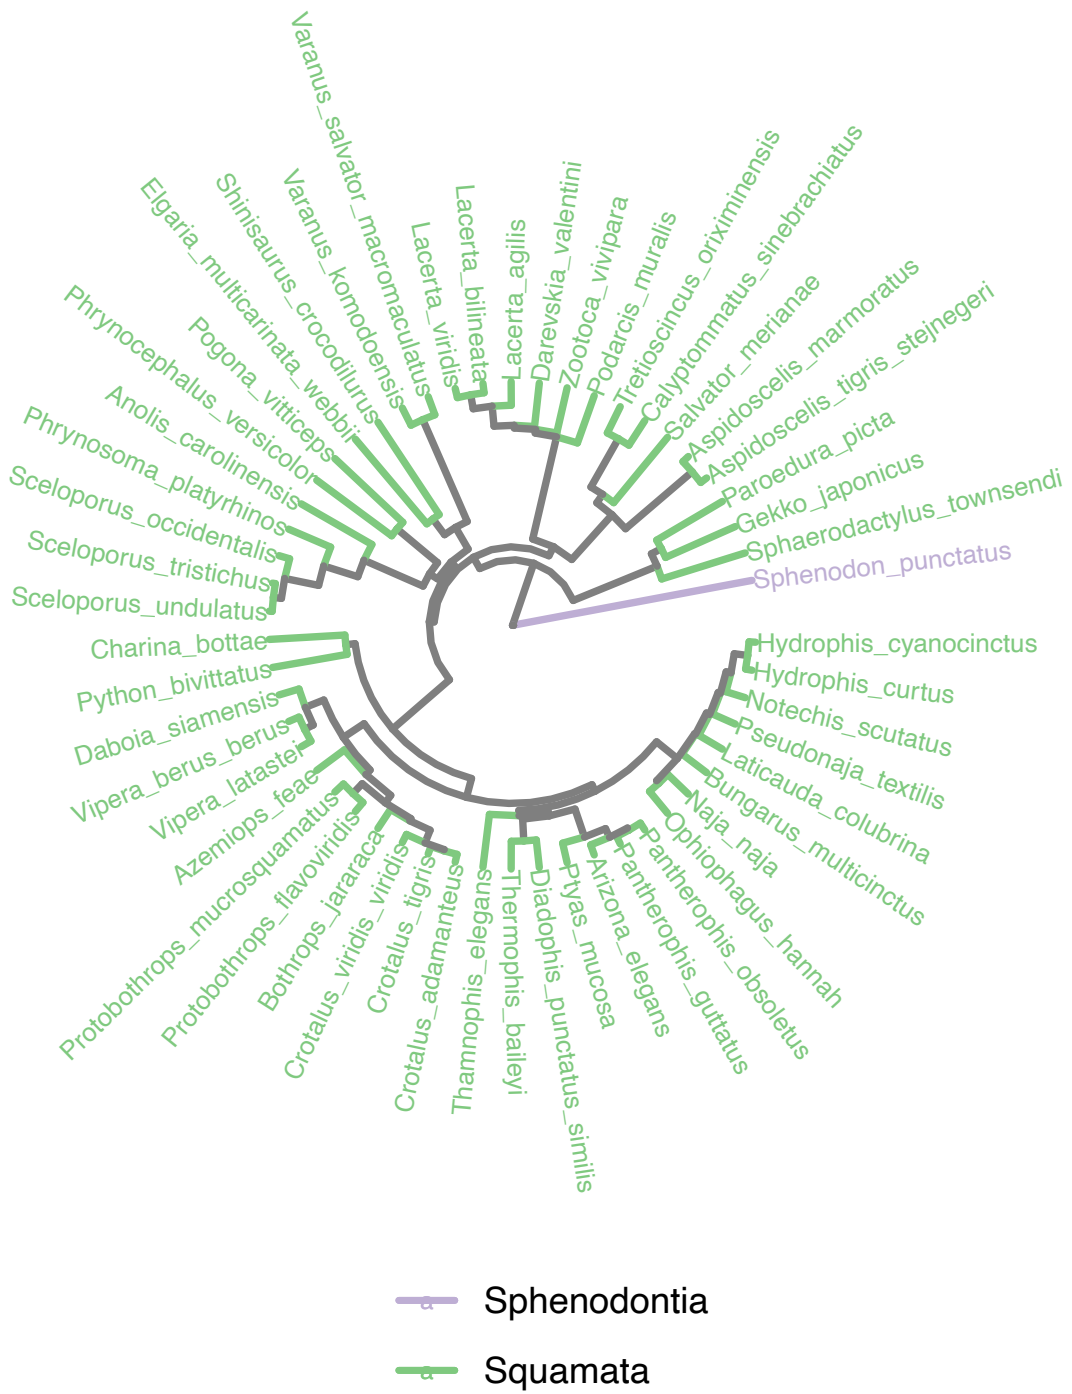

**g) Testudines**

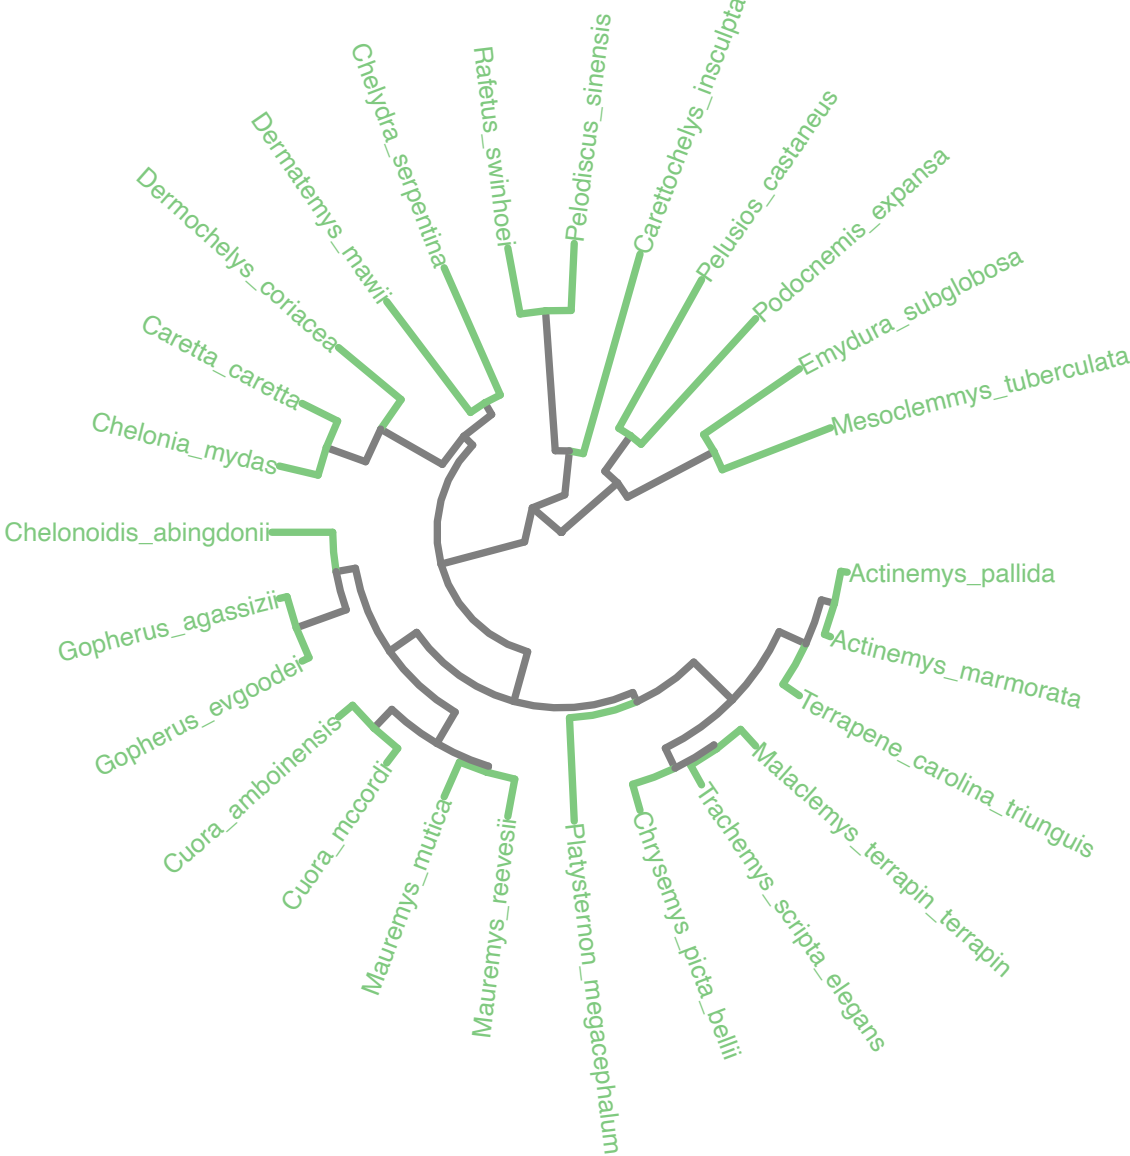



# h) Aves (with Crocodylia as outgroup)

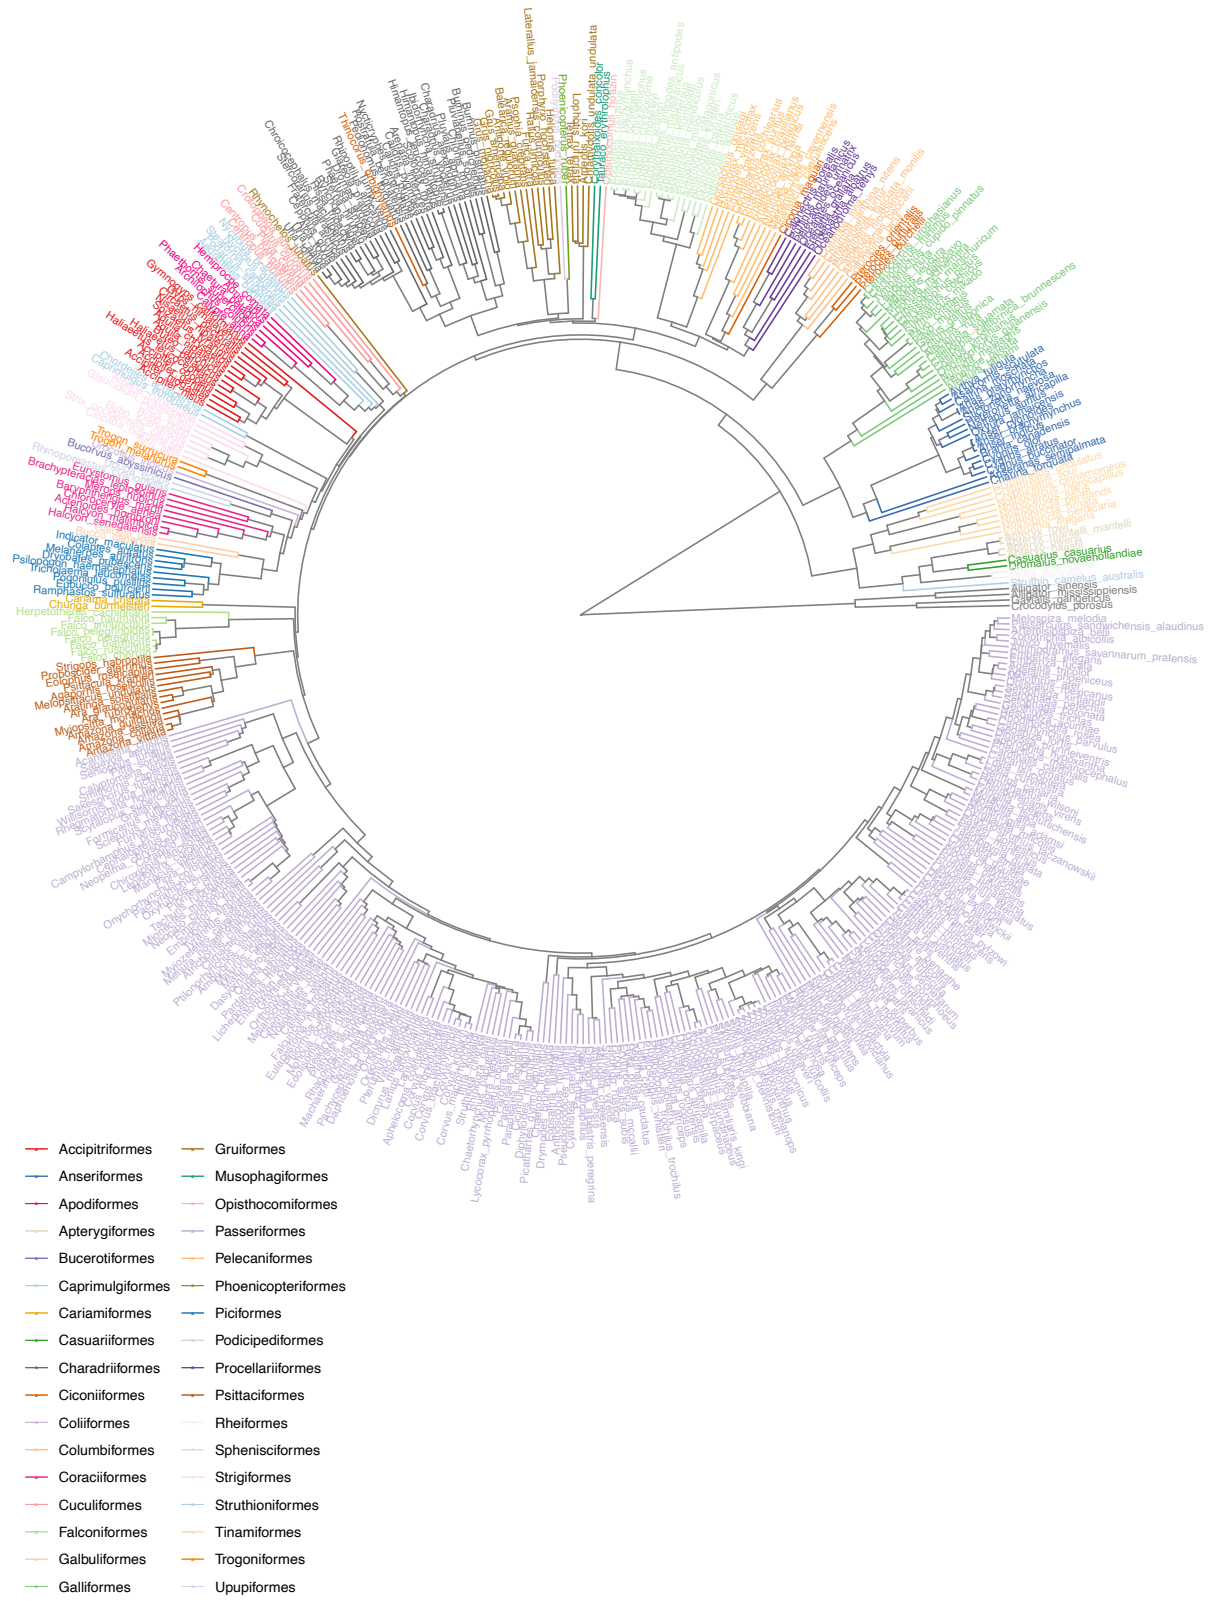

**Supplementary Fig. 11 | Phylogenies showing the number of complete chemoreceptors reported.** Vertebrate (sub)class phylogenies displaying the number of chemoreceptors (similar to the Fig. 1 in the main text, BUSCO80 dataset). **a**, Agnatha; **b**, Chondrichthyes; **c**, Actinopterygii; **d**, Amphibia; **e**, Mammalia; **f**, Lepidosauria; **g**, Testudines; **h**, Aves and Crocodylia. Terminal branches and species names are colored according to order based on the NCBI taxonomy database. Source data are provided as a Source Data file.

**a) Agnatha**

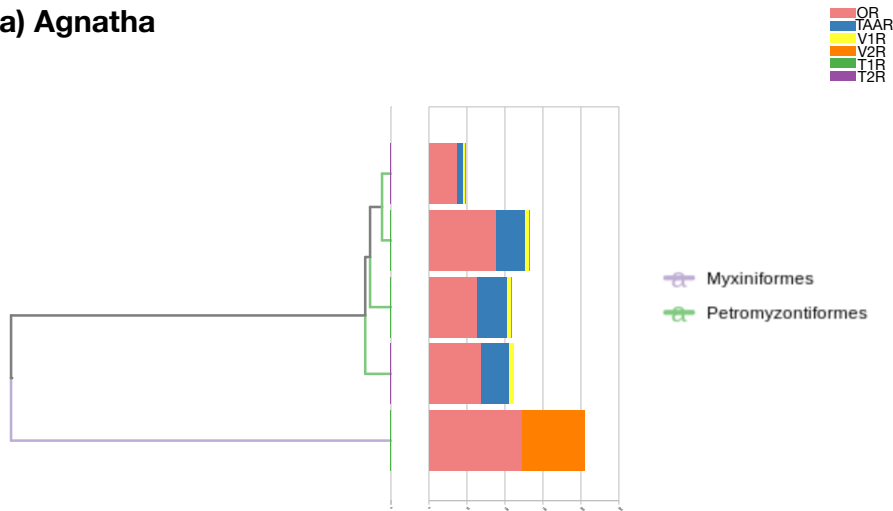

**b) Chondrichthyes**

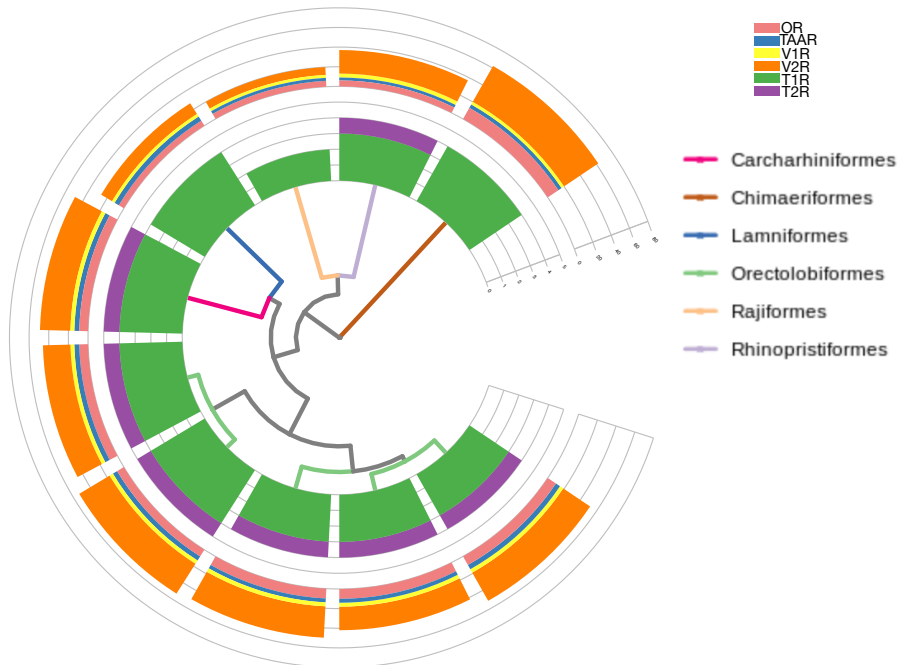

### c) Actinopterygii

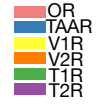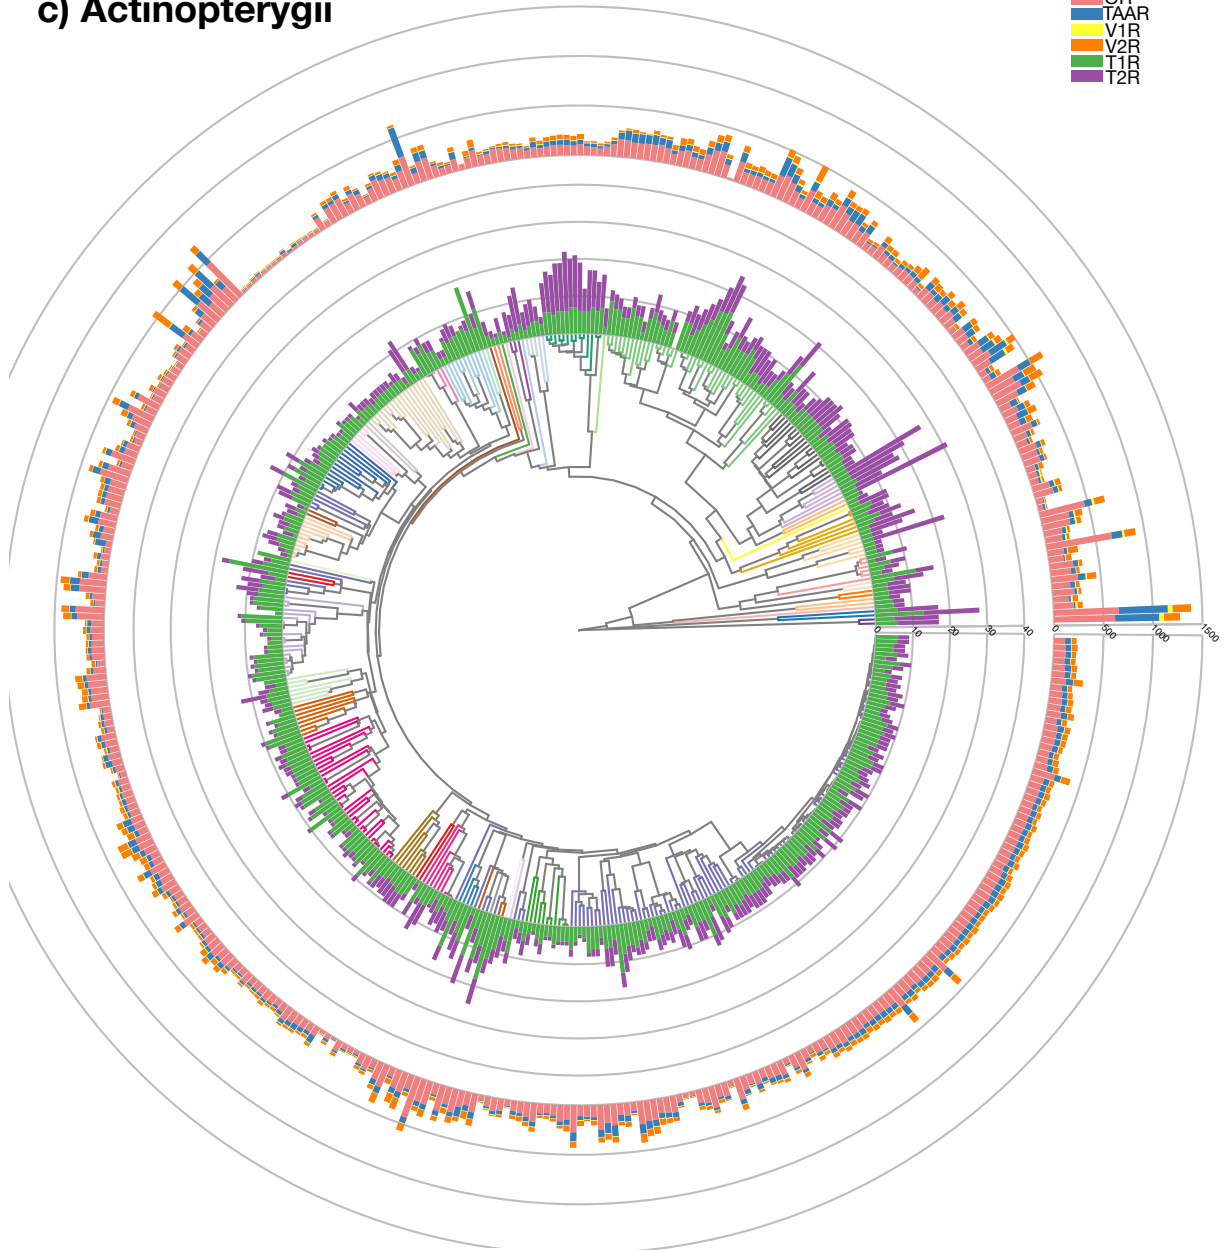

- |                     |                      |                     |
|---------------------|----------------------|---------------------|
| — Acanthuriformes   | — Cypriniformes      | — Lutjaniformes     |
| — Acipenseriformes  | — Cyprinodontiformes | — Mugiliformes      |
| — Albuliformes      | — Elopiformes        | — Ophidiiformes     |
| — Amiiformes        | — Esociformes        | — Osmeriformes      |
| — Anabantiformes    | — Eupercaria         | — Osteoglossiformes |
| — Anguilliformes    | — Gadiformes         | — Perciformes       |
| — Atheriniformes    | — Galaxiiformes      | — Pleuronectiformes |
| — Batrachoidiformes | — Gobiiformes        | — Polypteriformes   |
| — Beloniformes      | — Gonorynchiformes   | — Salmoniformes     |
| — Blenniiformes     | — Gymnotiformes      | — Scombriformes     |
| — Carangiformes     | — Holocentriformes   | — Semionotiformes   |
| — Centrarchiformes  | — Istiophoriformes   | — Siluriformes      |
| — Chaetodontiformes | — Kurtiformes        | — Spariformes       |
| — Characiformes     | — Labriformes        | — Synbranchiformes  |
| — Cichliformes      | — Lampriformes       | — Syngnathiformes   |
| — Clupeiformes      | — Lophiiformes       | — Tetraodontiformes |

# d) Amphibia

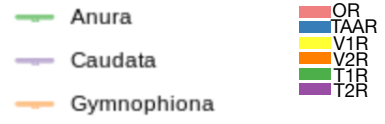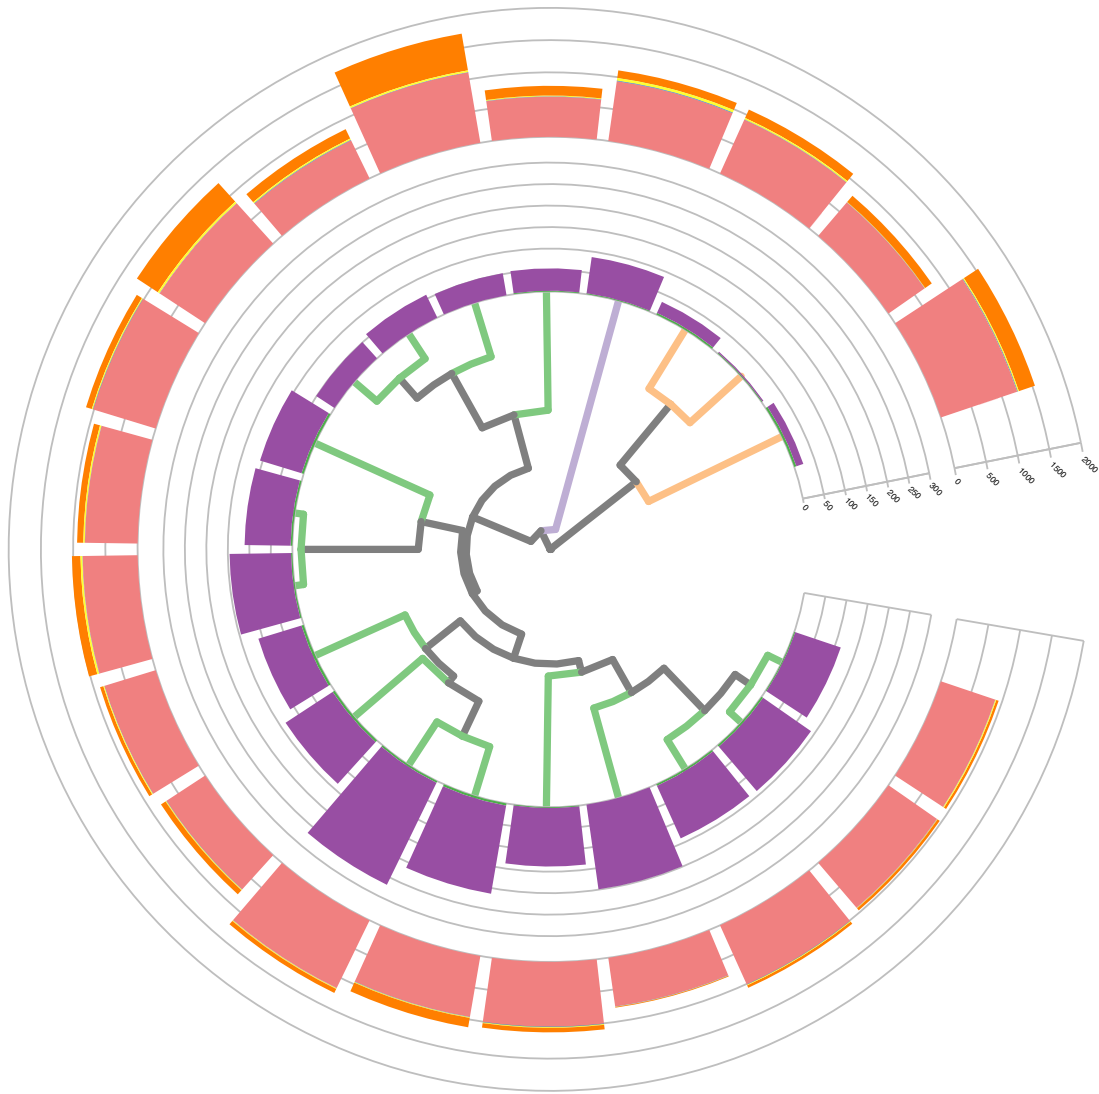

# e) Mammalia

OR  
TAAR  
V1R  
V2R  
T1R  
T2R

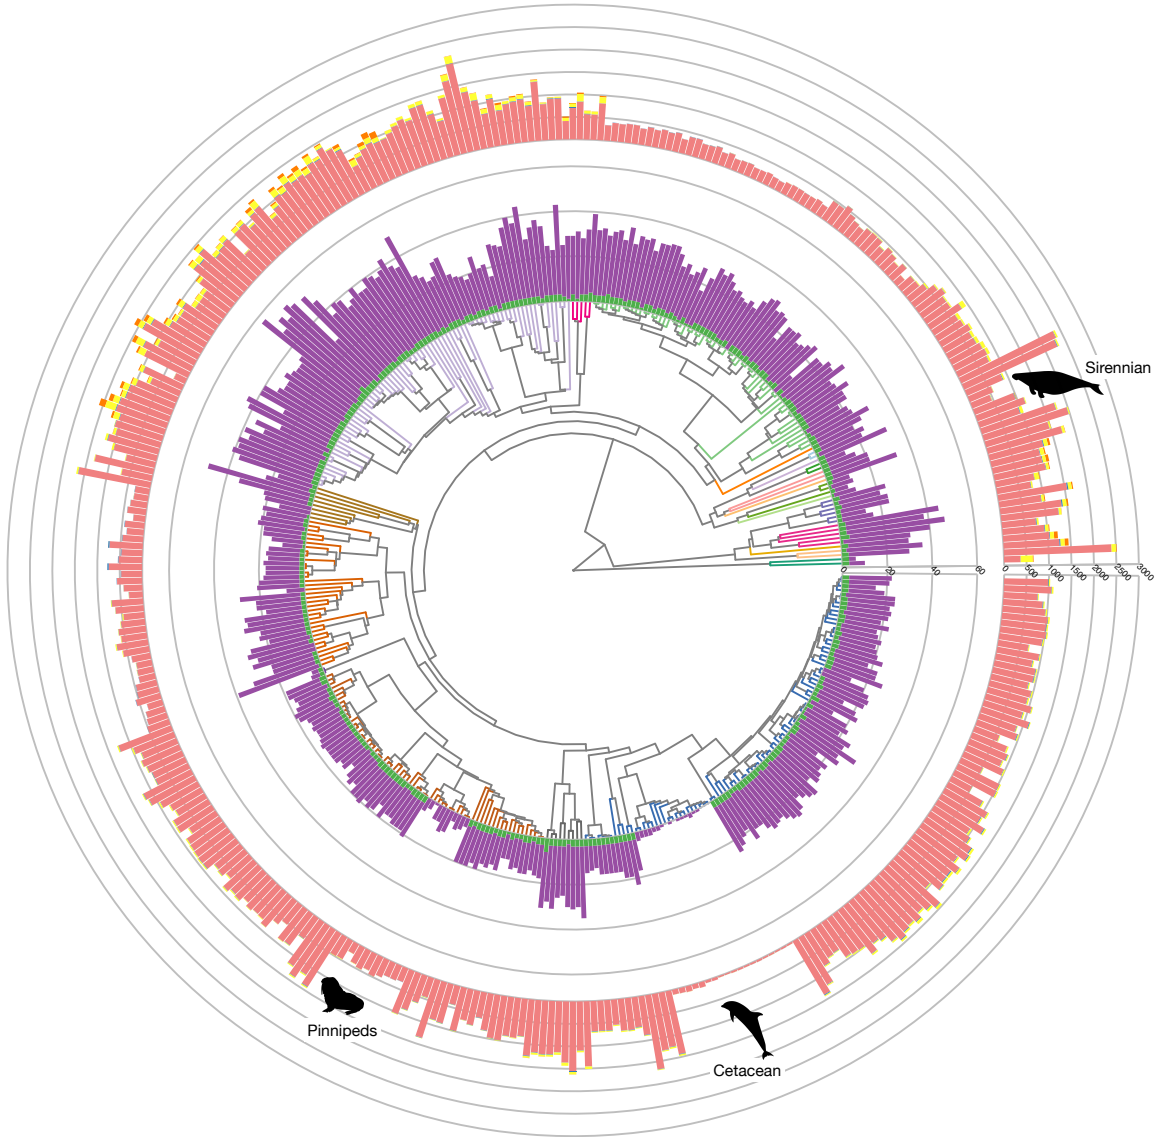

- |                   |                  |
|-------------------|------------------|
| — Afrosoricida    | — Lagomorpha     |
| — Artiodactyla    | — Macroscelidea  |
| — Carnivora       | — Microbiotheria |
| — Chiroptera      | — Monotremata    |
| — Cingulata       | — Perissodactyla |
| — Dasyuromorphia  | — Pholidota      |
| — Dermoptera      | — Pilosa         |
| — Didelphimorphia | — Primates       |
| — Diprotodontia   | — Proboscidea    |
| — Eulipotyphla    | — Rodentia       |
| — Hyracoidea      | — Sirenia        |

f) Lepidosauria

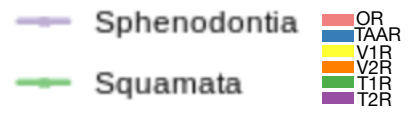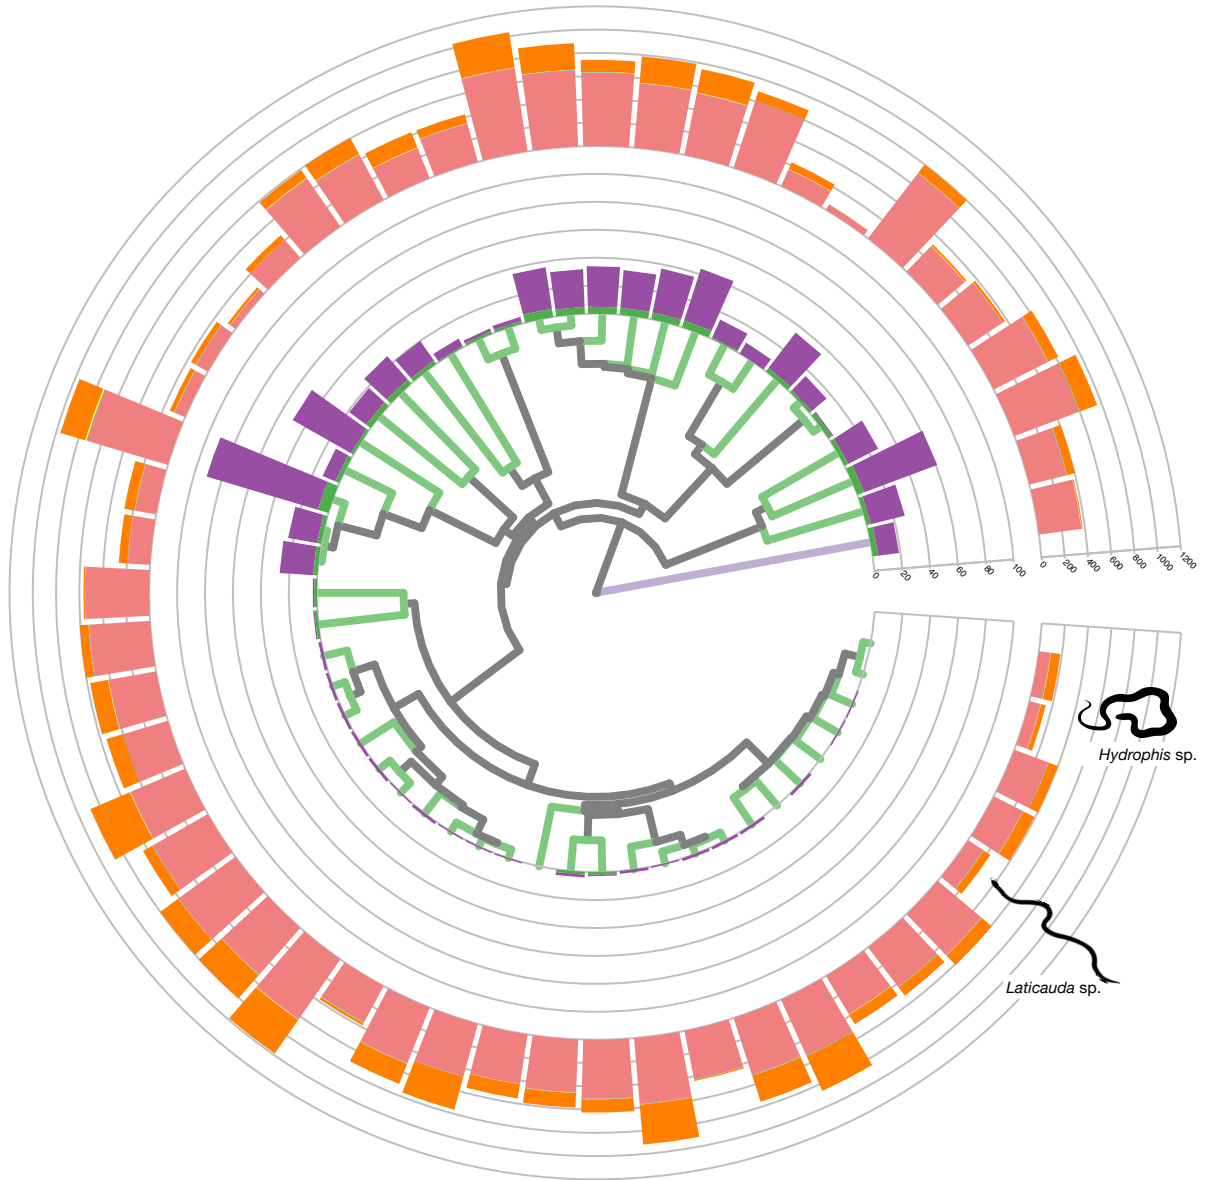

# g) Turtles

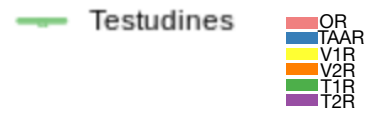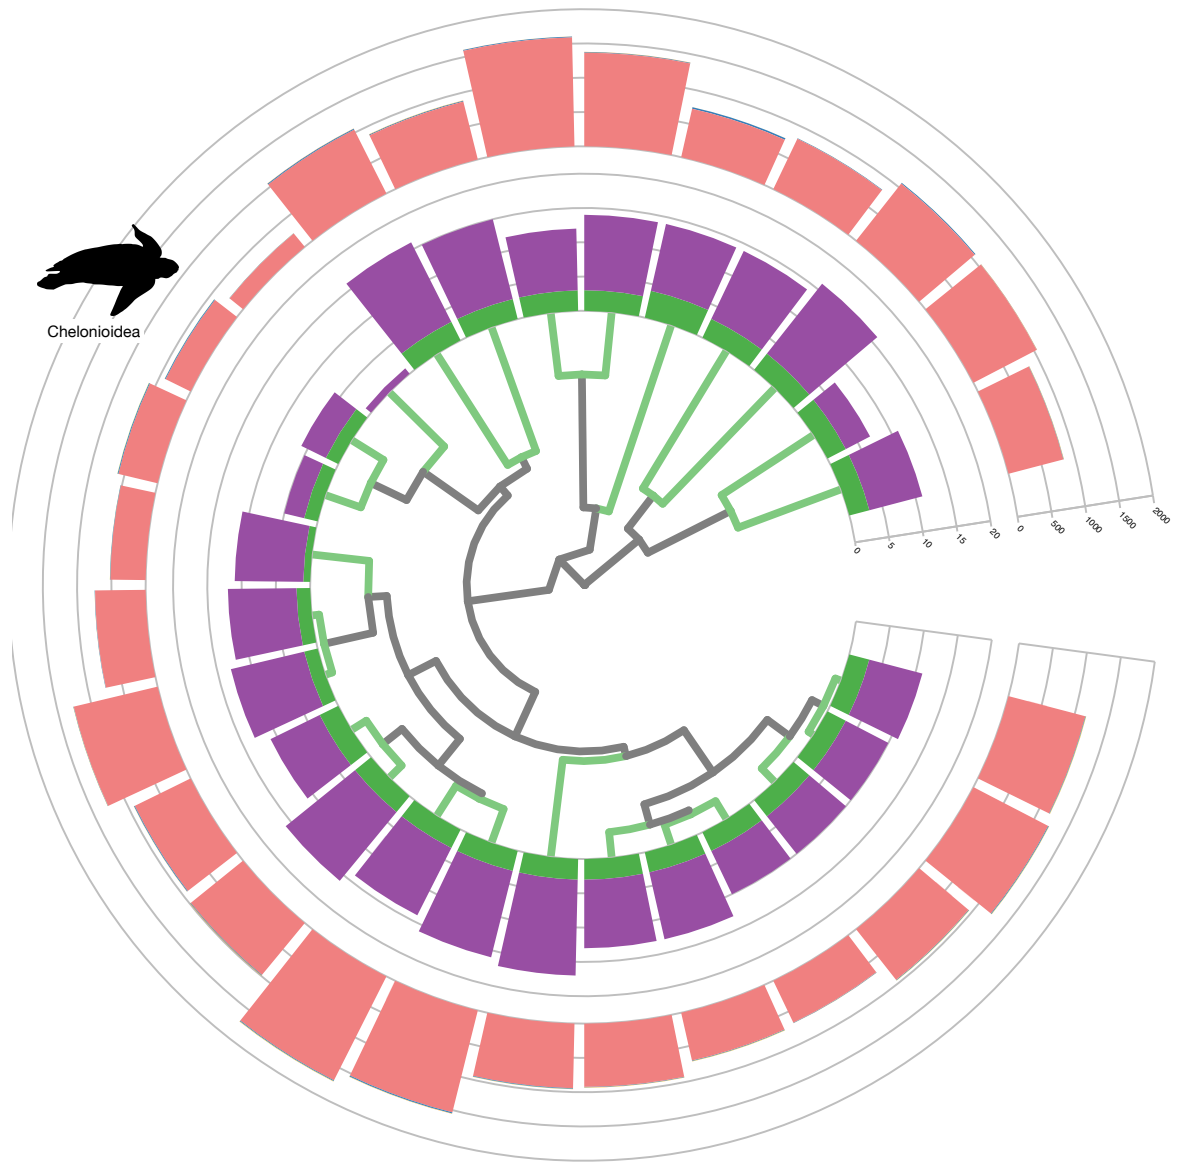

# h) Aves (with Crocodylia as outgroup)

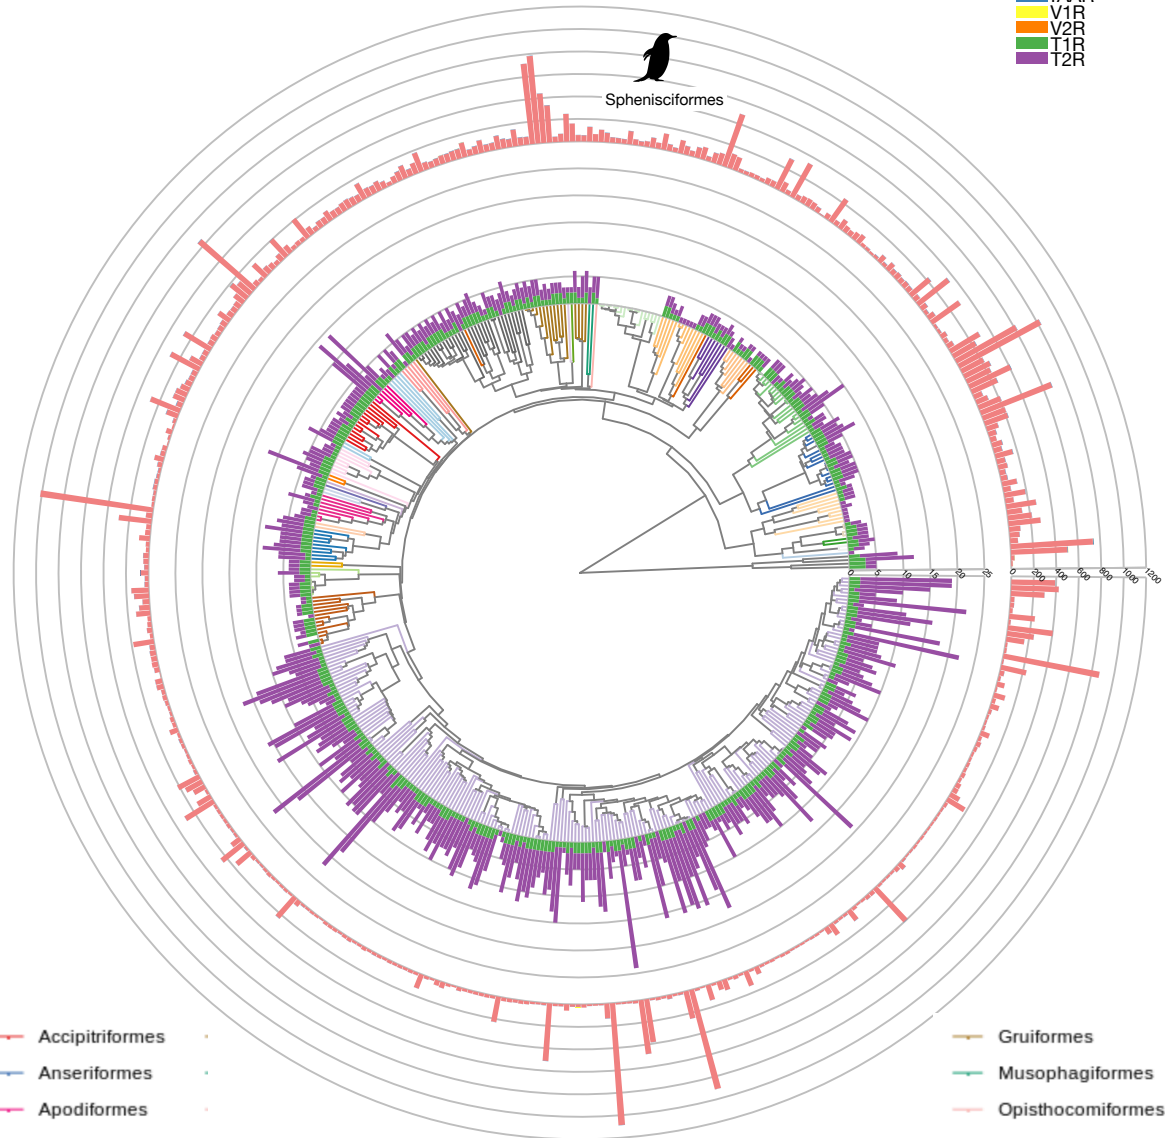

- Accipitriformes
- Anseriformes
- Apodiformes
- Apterygiformes
- Bucerotiformes
- Caprimulgiformes
- Cariamiformes
- Casuariiformes
- Charadriiformes
- Ciconiiformes
- Coliiformes
- Columbiformes
- Coraciiformes
- Cuculiformes
- Falconiformes
- Galbuliformes
- Galliformes

- Gruiformes
- Musophagiformes
- Opisthocomiformes
- Passeriformes
- Pelecaniformes
- Phoenicopteriforme
- Piciformes
- Podicipediformes
- Procellariiformes
- Psittaciformes
- Rheiformes
- Sphenisciformes
- Strigiformes
- Struthioniformes
- Tinamiformes
- Trogoniformes
- Upupiformes



**Supplementary Fig. 12 | Phylogenies showing the number of complete *OR* genes.** Vertebrate phylogeny and (sub)class phylogenies displaying the number of complete *OR* genes (BUSCO80 dataset). **a**, Vertebrata; **b**, Agnatha; **c**, Chondrichthyes; **d**, Actinopterygii; **e**, Amphibia; **f**, Mammalia; **g**, Lepidosauria; **h**, Testudines; **i**, Aves and Crocodilia. Terminal branches and species names are colored according to (sub)class (**a**) or according to order based on the NCBI taxonomy database (**b-i**). *OR* subclades are indicated. Source data are provided as a Source Data file.

## a) Vertebrates

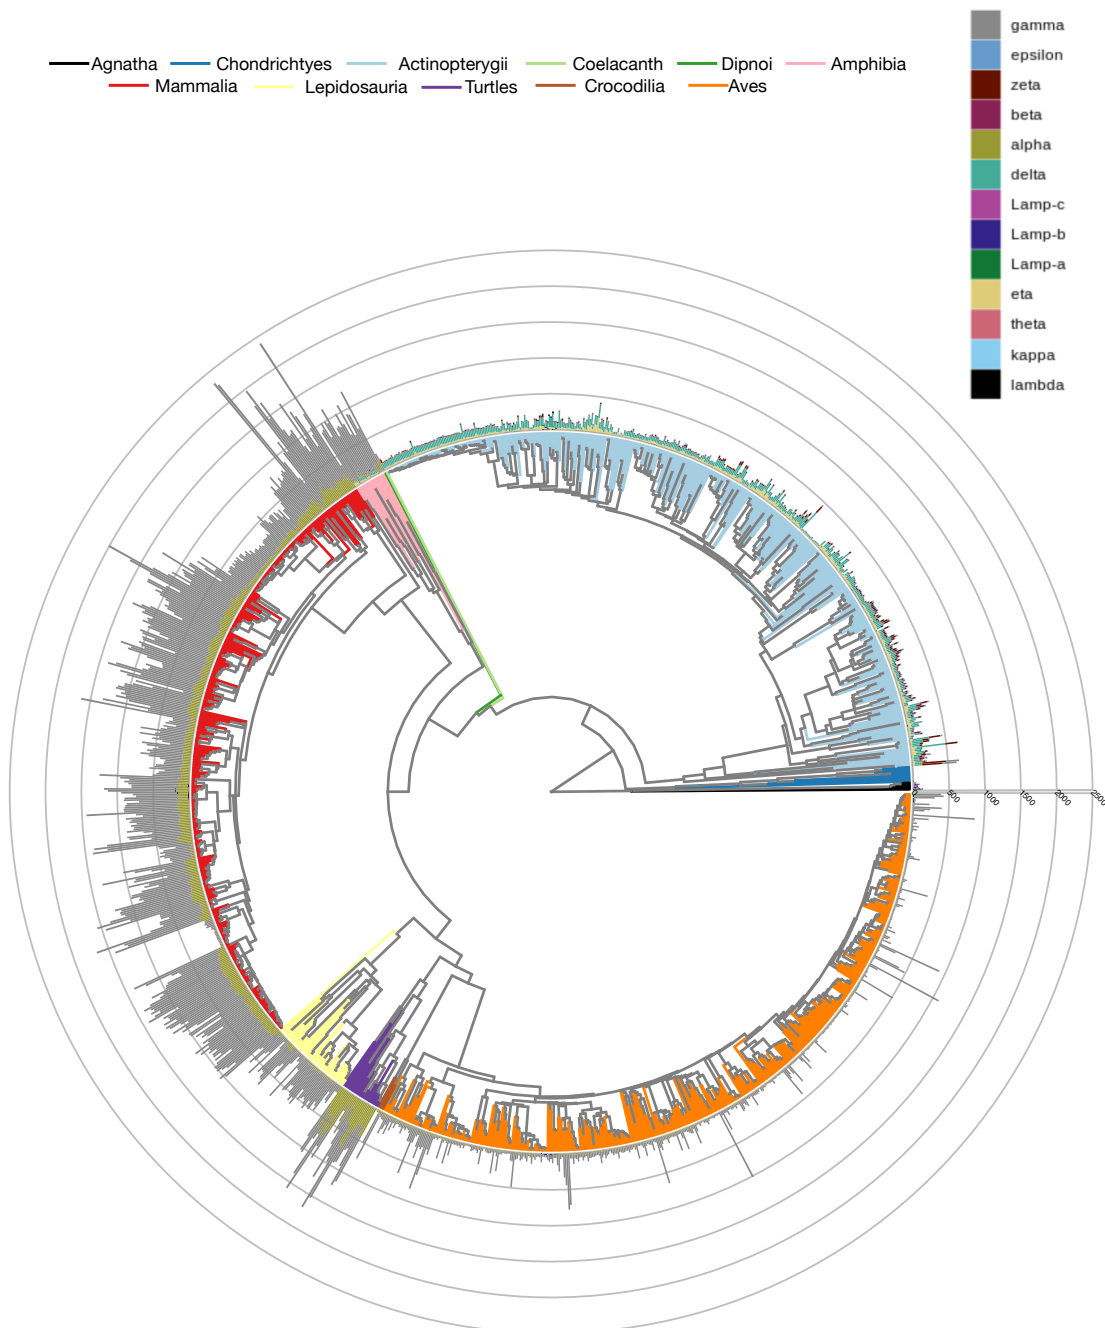

**b) Agnatha**

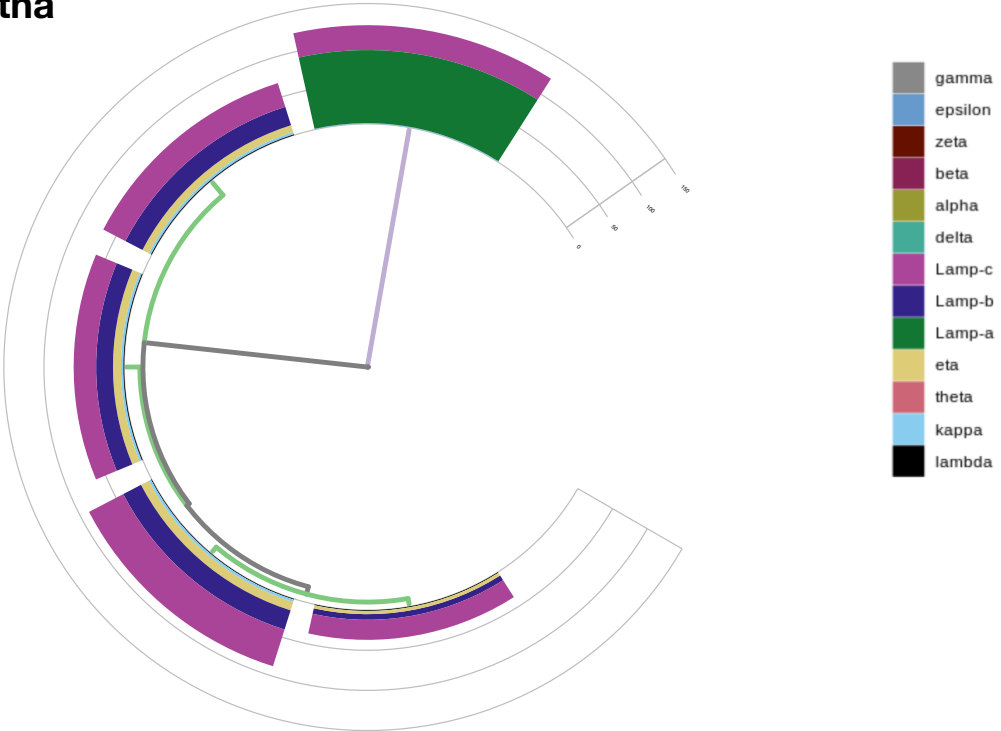

**c) Chondrichthyes**

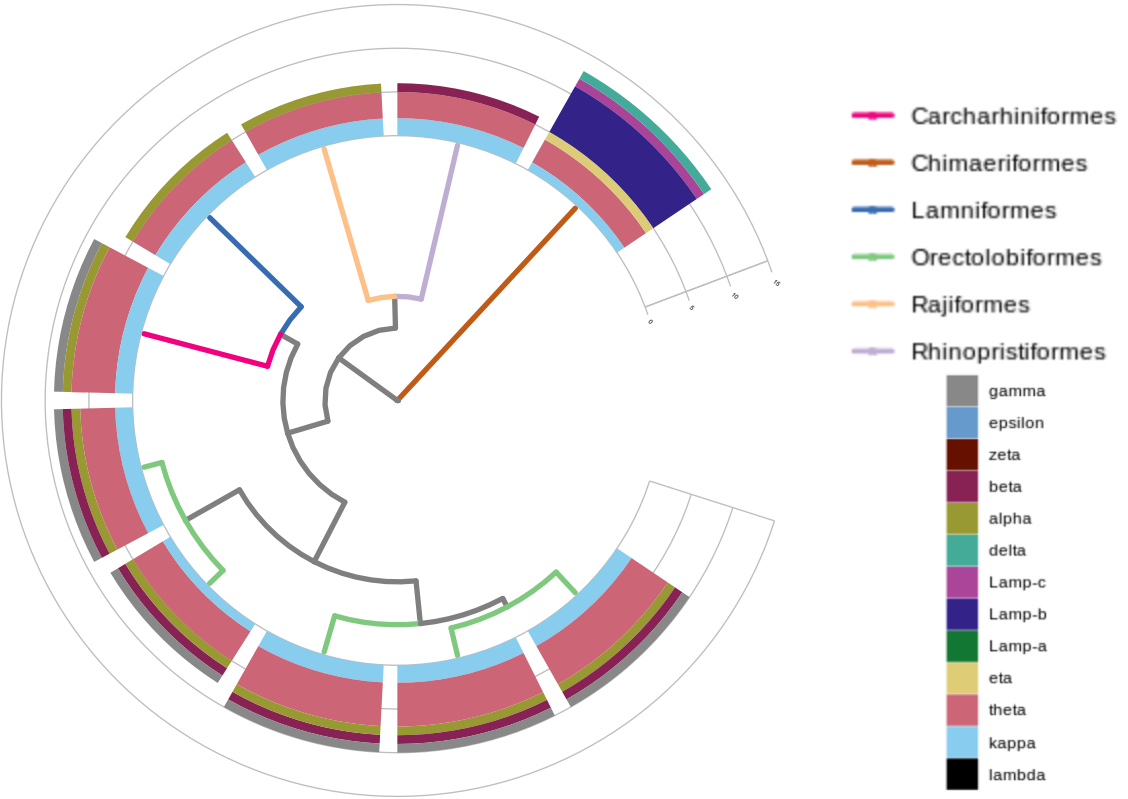

## d) Actinopterygii

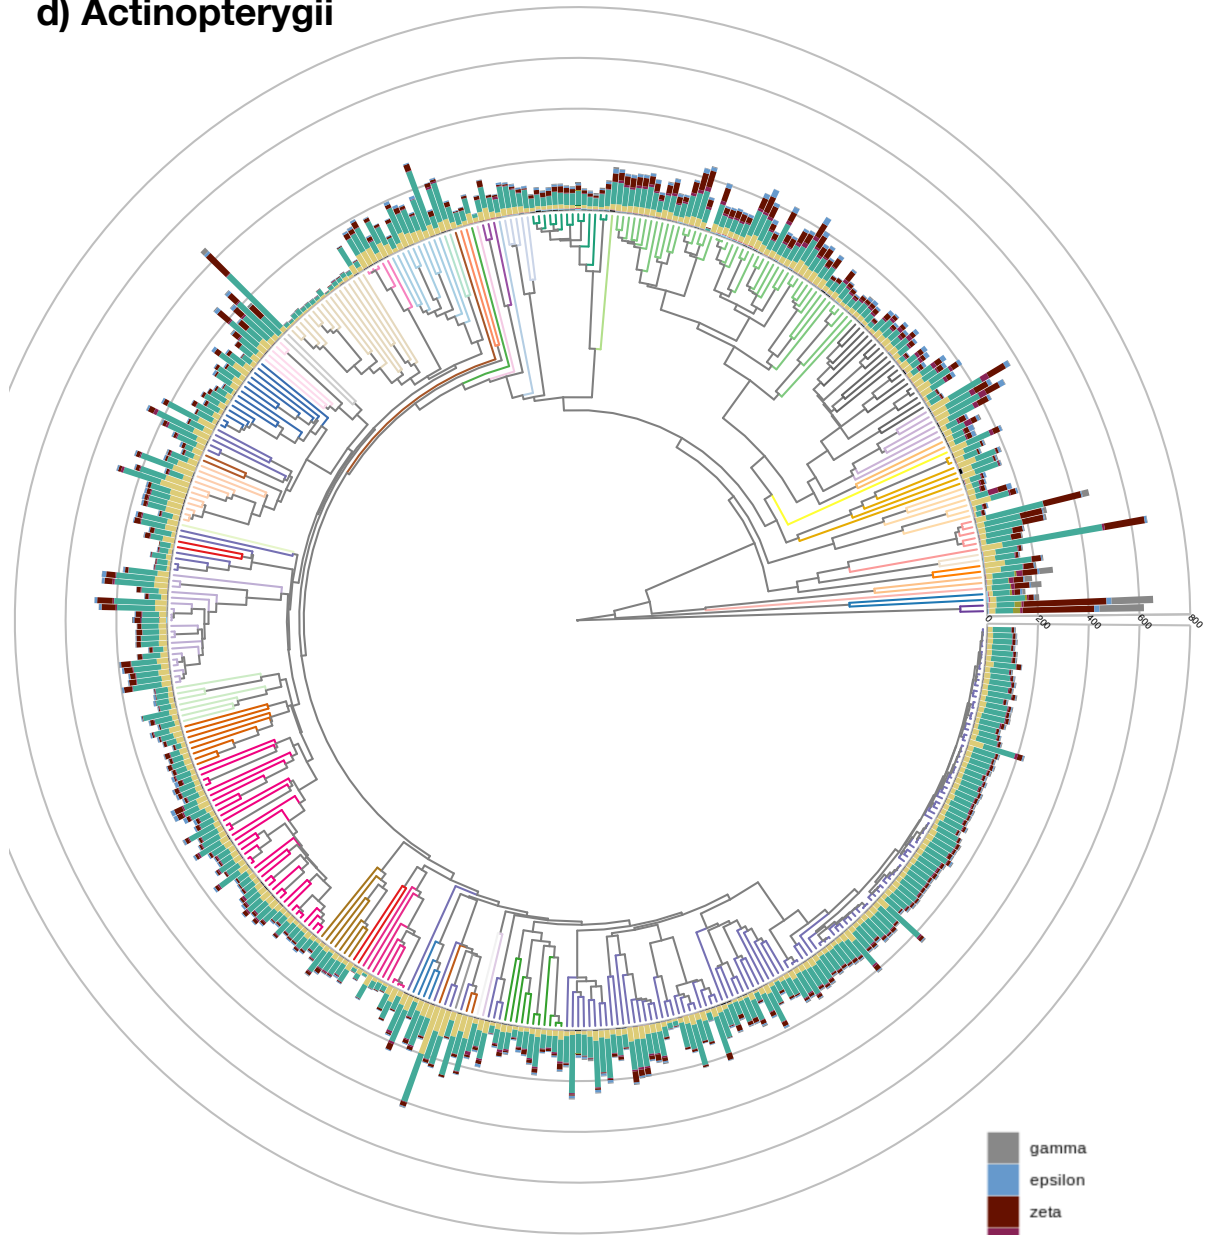

- |                   |                    |                   |
|-------------------|--------------------|-------------------|
| Acanthuriformes   | Cypriniformes      | Luŕaniiformes     |
| Acipenseriformes  | Cyprinodontiformes | Mugiliformes      |
| Albuliformes      | Elopiiformes       | Ophidiiformes     |
| Amiiformes        | Esociformes        | Osmeriformes      |
| Anabantiformes    | Eupercaria         | Osteoglossiformes |
| Anguilliformes    | Gadiformes         | Perciformes       |
| Atheriniformes    | Galaxiiformes      | Pleuronectiformes |
| Batrachoidiformes | Gobiiformes        | Polypteriformes   |
| Beloniformes      | Gonorynchiformes   | Salmoniformes     |
| Blenniiformes     | Gymnotiformes      | Scombriformes     |
| Carangiformes     | Holocentriiformes  | Semionotiformes   |
| Centrarchiformes  | Istiophoriformes   | Siluriformes      |
| Chaetodontiformes | Kurtiformes        | Spariformes       |
| Characiformes     | Labriformes        | Synbranchiiformes |
| Cichliformes      | Lampriformes       | Syngnathiformes   |
| Clupeiformes      | Lophiiformes       | Tetraodontiformes |

- gamma
- epsilon
- zeta
- beta
- alpha
- delta
- Lamp-c
- Lamp-b
- Lamp-a
- eta
- theta
- kappa
- lambda

# e) Amphibia

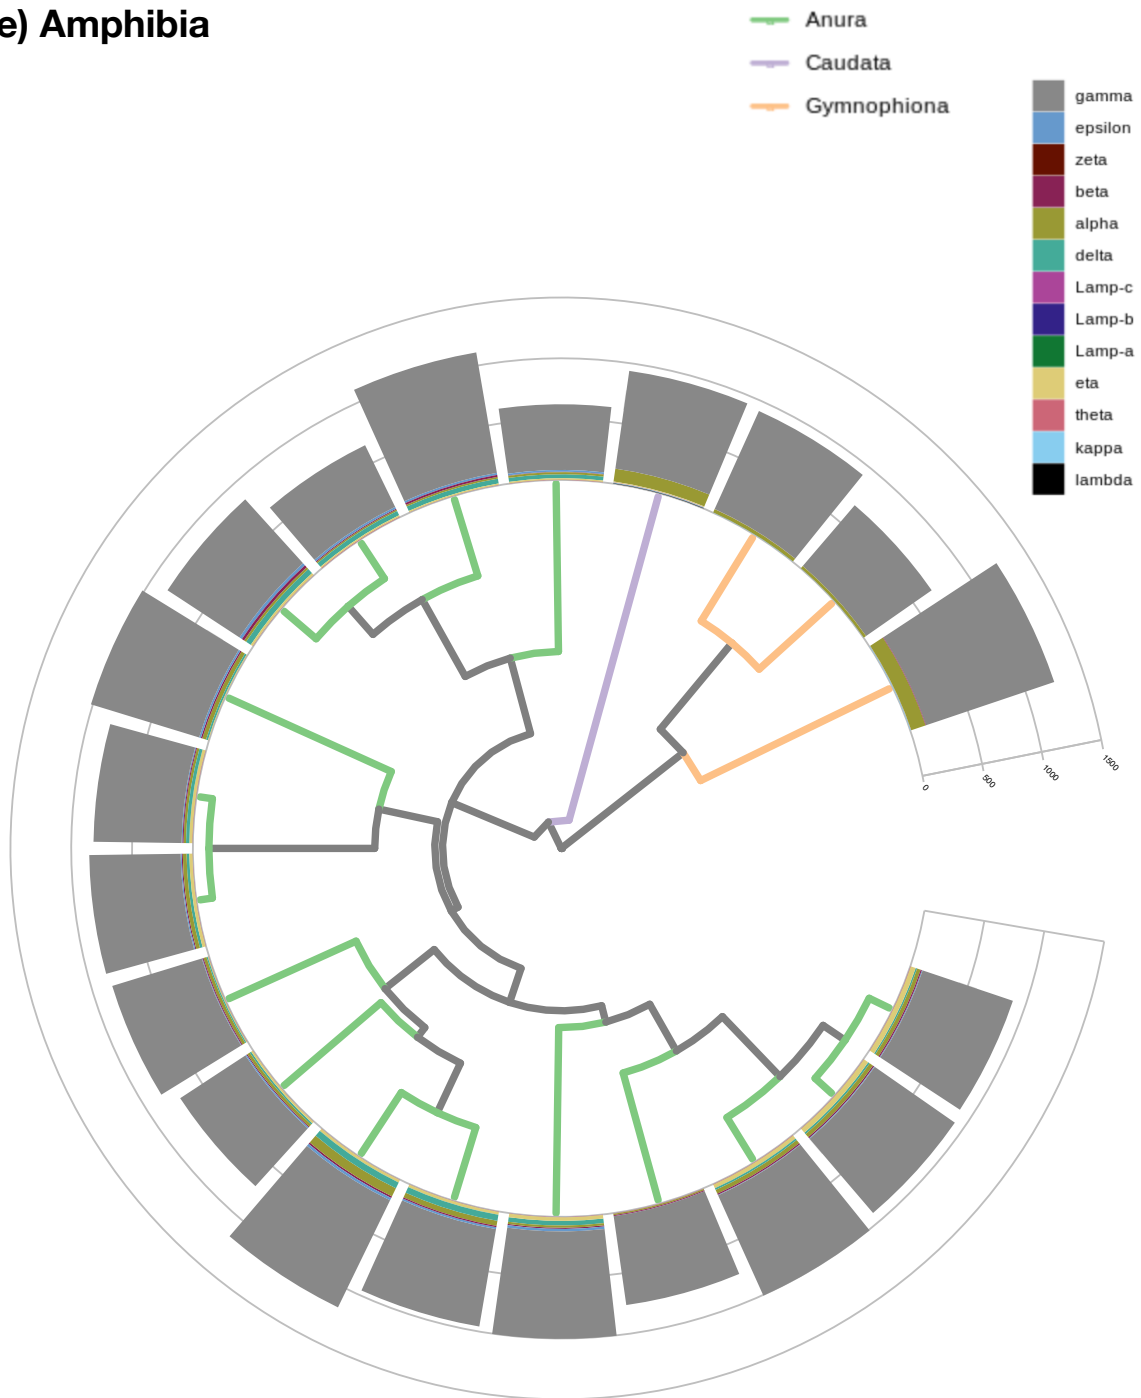

## f) Mammalia

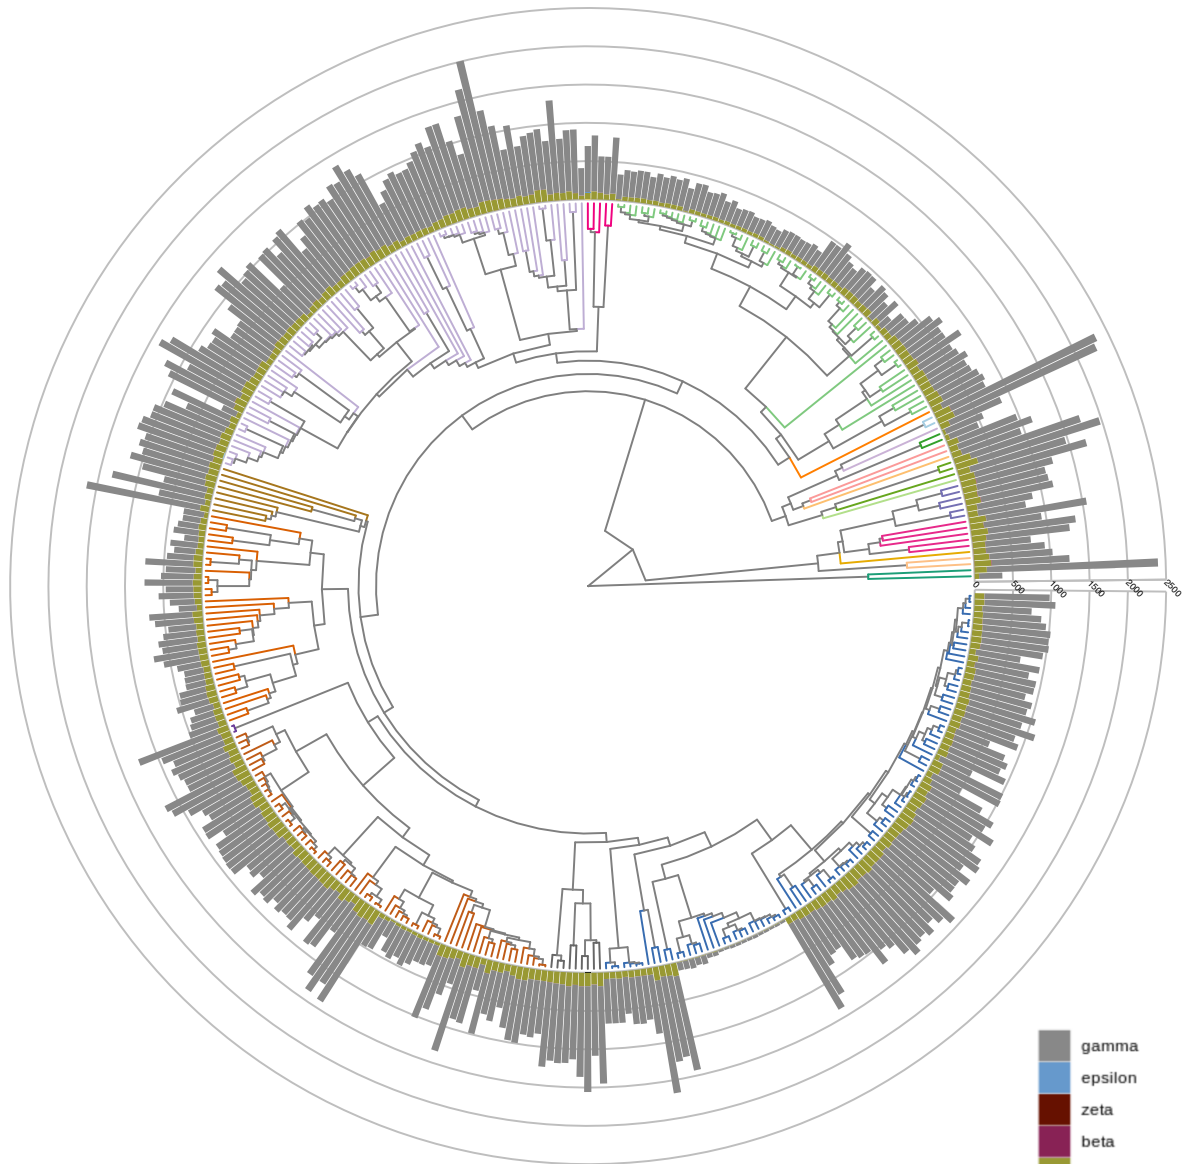

- |                   |                  |
|-------------------|------------------|
| — Afrosoricida    | — Lagomorpha     |
| — Artiodactyla    | — Macroscelidea  |
| — Carnivora       | — Microbiotheria |
| — Chiroptera      | — Monotremata    |
| — Cingulata       | — Perissodactyla |
| — Dasyuromorphia  | — Pholidota      |
| — Dermoptera      | — Pilosa         |
| — Didelphimorphia | — Primates       |
| — Diprotodontia   | — Proboscidea    |
| — Eulipotyphla    | — Rodentia       |
| — Hyracoidea      | — Sirenia        |

- |           |
|-----------|
| ■ gamma   |
| ■ epsilon |
| ■ zeta    |
| ■ beta    |
| ■ alpha   |
| ■ delta   |
| ■ Lamp-c  |
| ■ Lamp-b  |
| ■ Lamp-a  |
| ■ eta     |
| ■ theta   |
| ■ kappa   |
| ■ lambda  |

# g) Lepidosauria

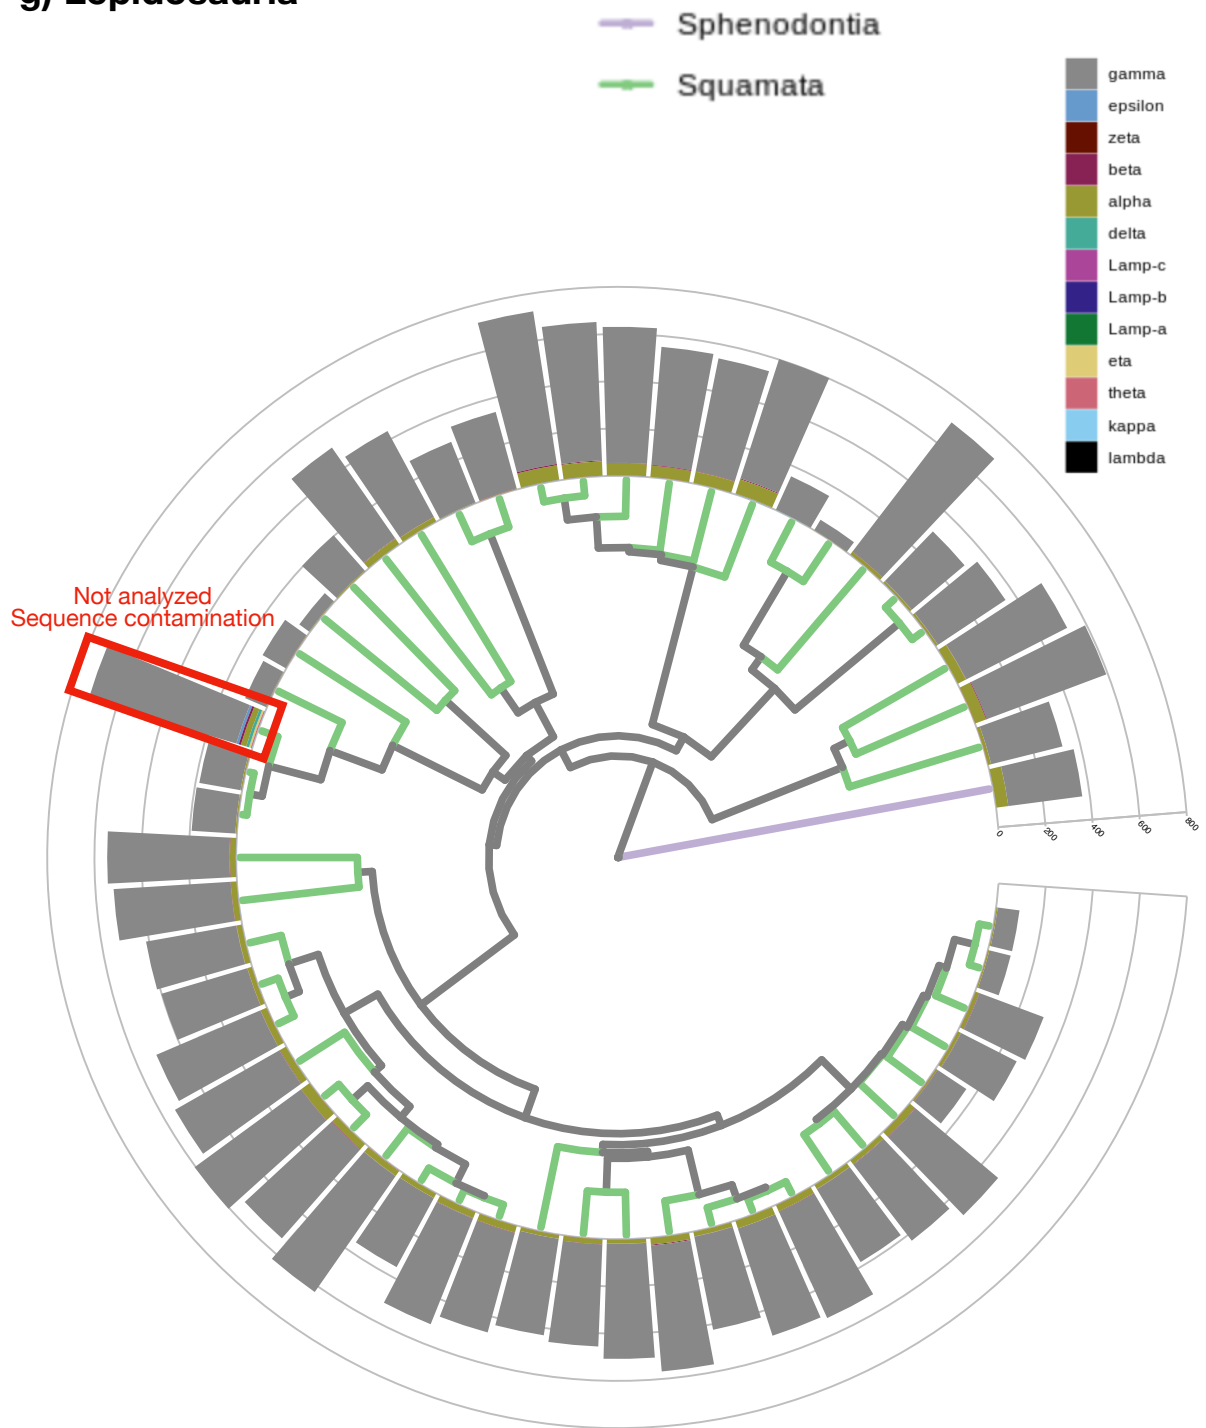

# h) Turtles

— Testudines

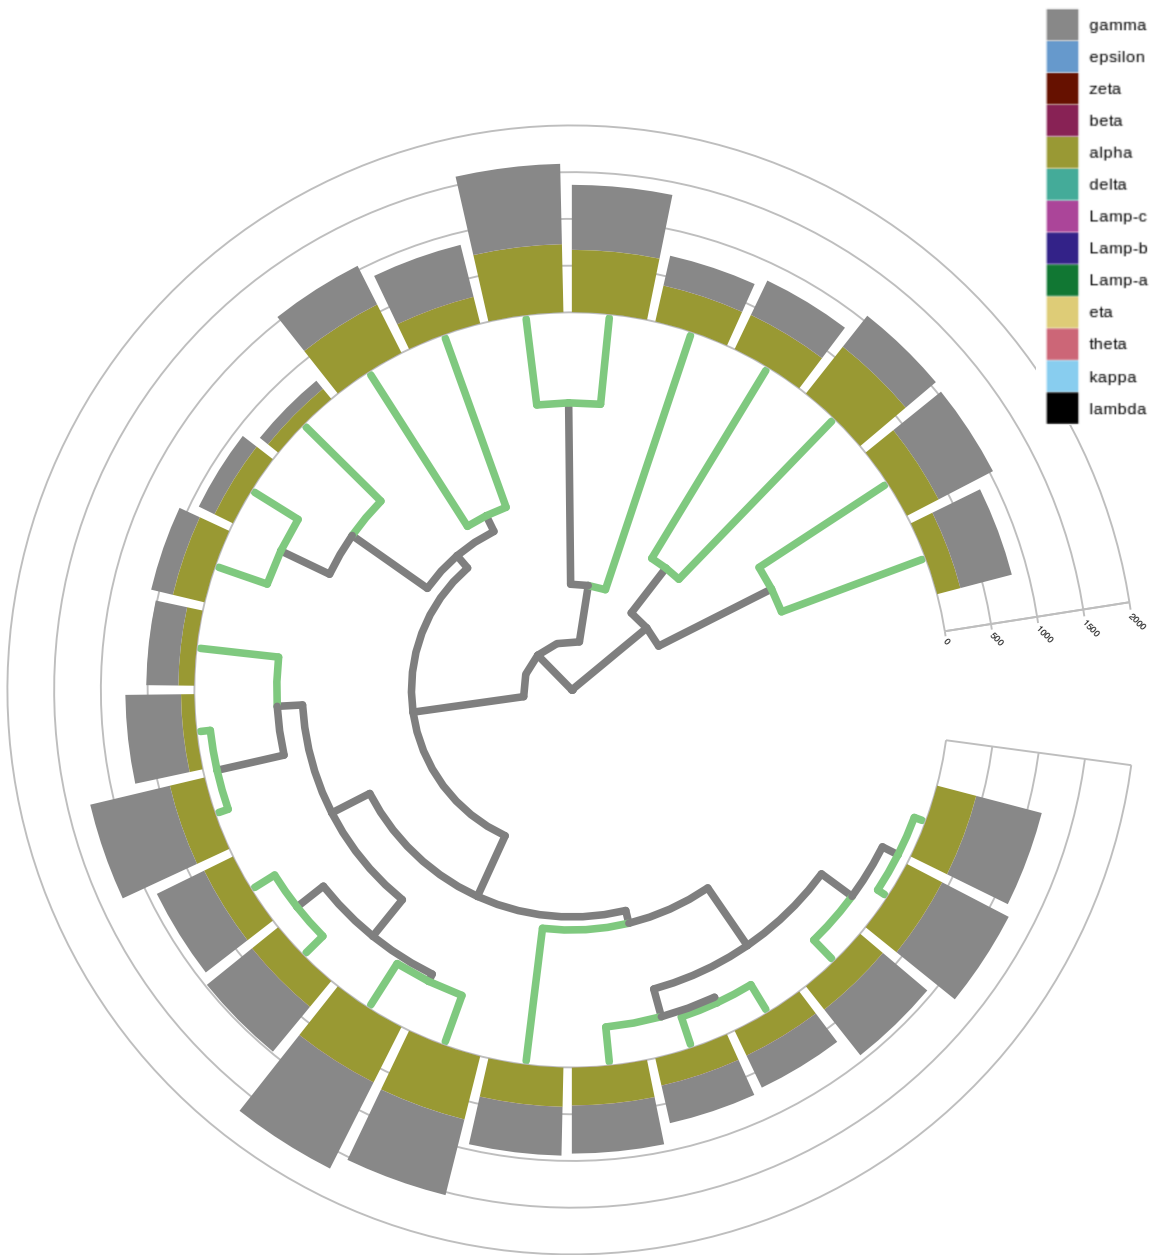

**i) Aves (with Crocodylia as outgroup)**

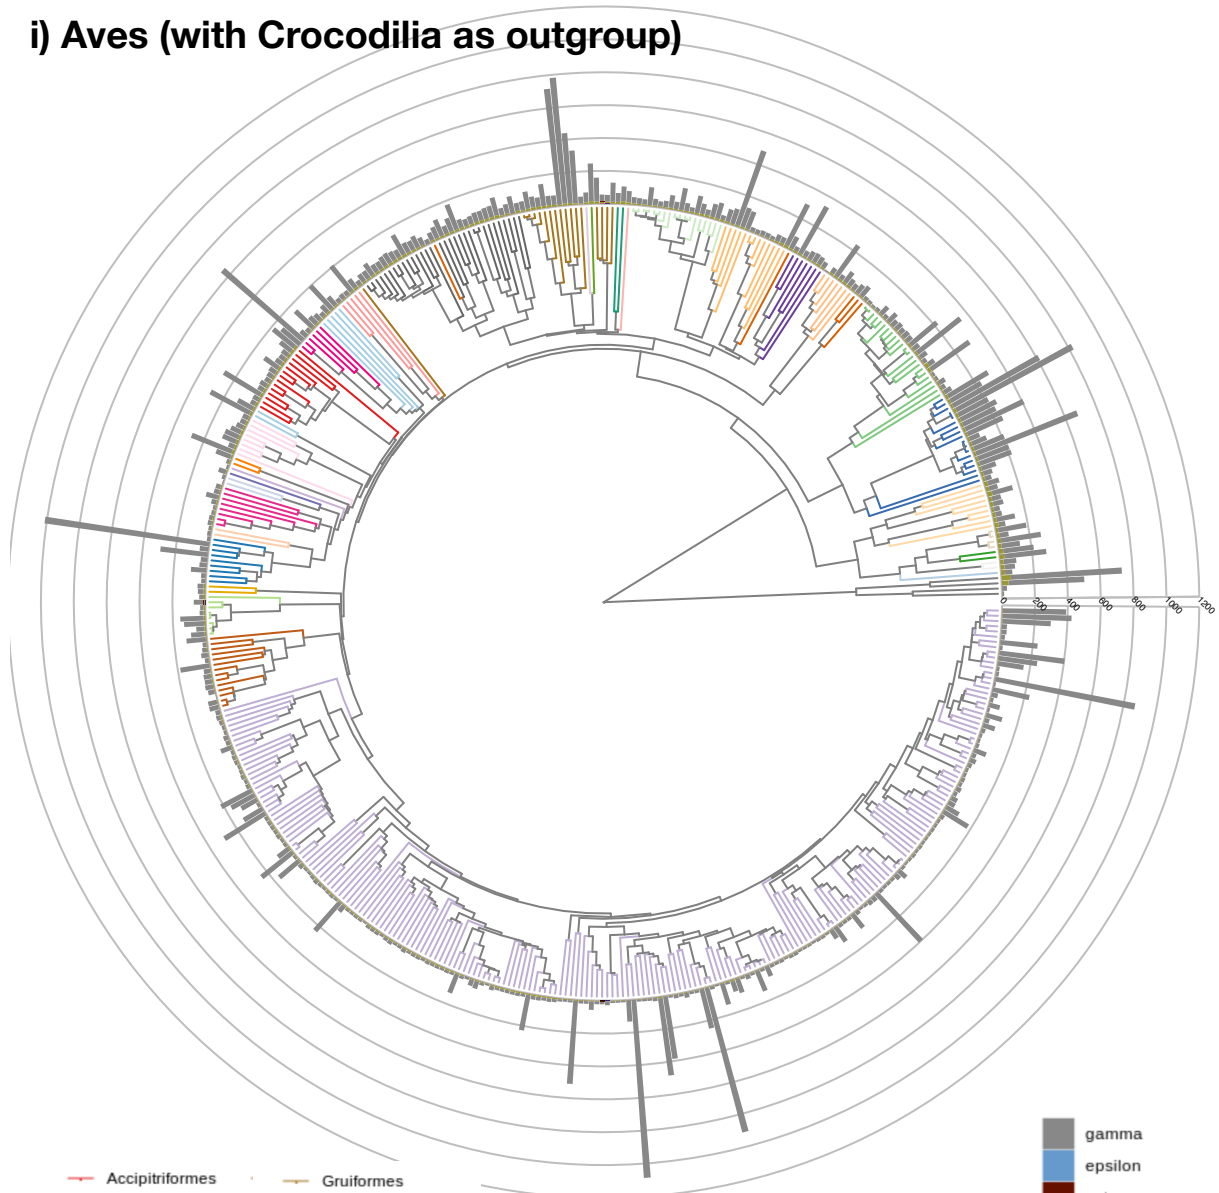

- |                  |                     |
|------------------|---------------------|
| Accipitriformes  | Gruiformes          |
| Anseriformes     | Musophagiformes     |
| Apodiformes      | Opisthocomiformes   |
| Apterygiformes   | Passeriformes       |
| Bucerotiformes   | Pelecaniformes      |
| Caprimulgiformes | Phoenicopteriformes |
| Cariamiformes    | Piciformes          |
| Casuariiformes   | Podicipediformes    |
| Charadriiformes  | Procellariiformes   |
| Ciconiiformes    | Psittaciformes      |
| Coliiformes      | Rheiformes          |
| Columbiformes    | Sphenisciformes     |
| Coraciiformes    | Strigiformes        |
| Cuculiformes     | Struthioniformes    |
| Falconiformes    | Tinamiformes        |
| Galbuliformes    | Trogoniformes       |
| Galliformes      | Upupiformes         |

- gamma
- epsilon
- zeta
- beta
- alpha
- delta
- Lamp-c
- Lamp-b
- Lamp-a
- eta
- theta
- kappa
- lambda



**Supplementary Fig. 13 | Vertebrate OR gene tree.** **a**, Near maximum likelihood phylogeny of OR genes in vertebrates with branches colored according to the vertebrate (sub)class. **b**, Clade tree generated from (a) with local support values indicated at each node (according to a Shimodaira-Hasegawa test). All clades defined by Niimura<sup>21</sup> in his earlier study of vertebrate OR genes were retrieved as monophyletic. We thus kept the previously proposed clade nomenclature, with *Type 1 OR genes* being composed of  $\delta$ ,  $\alpha$ ,  $\beta$ ,  $\zeta$ ,  $\epsilon$  and  $\gamma$  genes, and *Type 2 OR genes* being composed of  $\lambda$ ,  $\kappa$ ,  $\theta$  and  $\eta$  genes. Three additional *Type 2 OR* clades were found in this study: clade A, which is restricted to agnathans; clade B, which is restricted to agnathans, the Australian ghostshark (*Callorhynchus milii*) and the coelacanth; and clade C, which is restricted to agnathans and the ghostshark. The tree in newick version, as well as all sequences and the alignment file can be found in FigShare. Sub-trees of each vertebrate (sub)class with the number of OR genes are shown in Supplementary Fig. 12. Maximum likelihood phylogeny of OR genes extracted from one species per vertebrate (sub)class is shown in Supplementary Figs. 14-15.

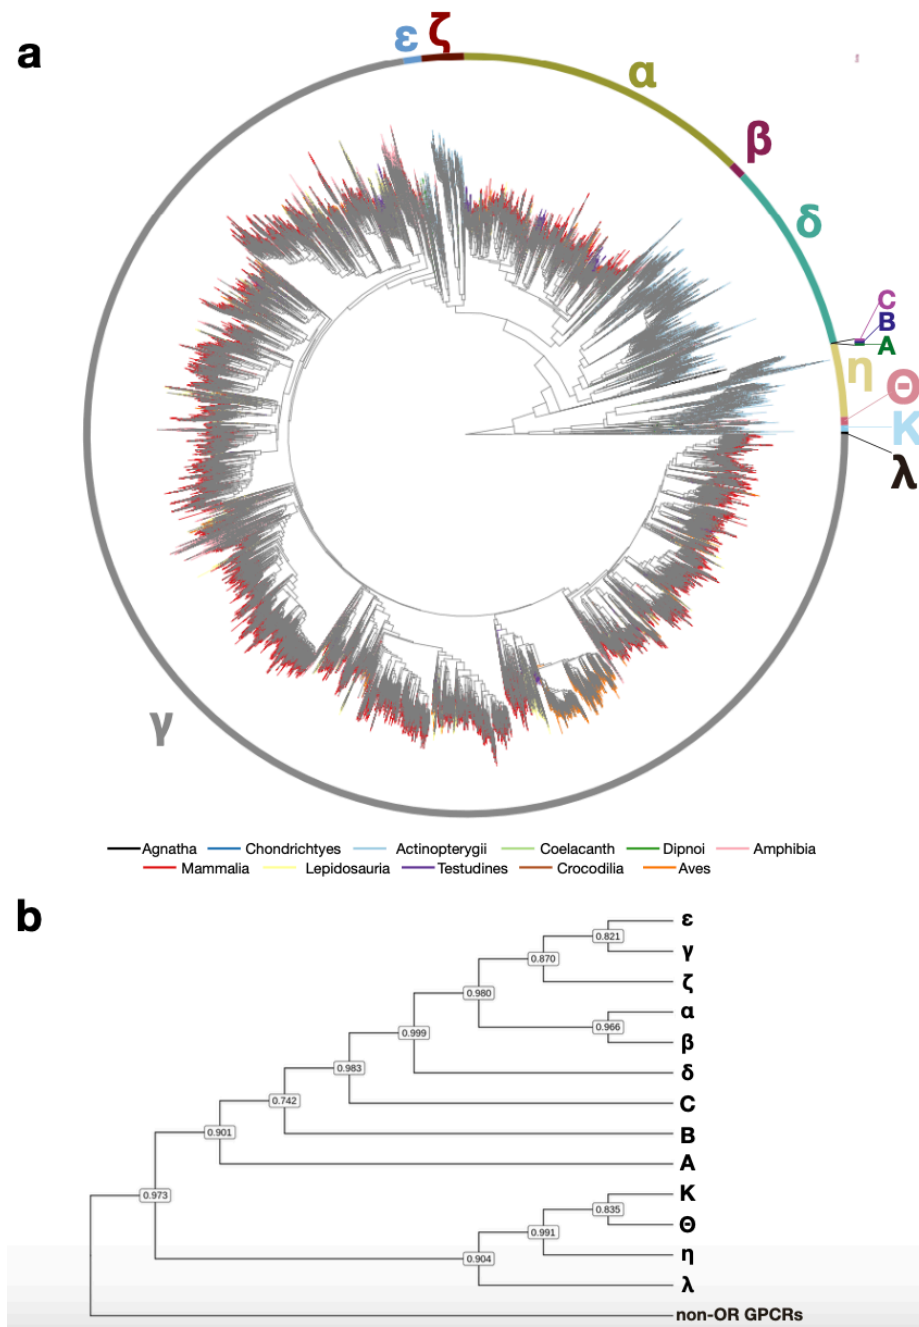

**Supplementary Fig. 14 | Maximum likelihood phylogeny of OR genes.** Maximum likelihood phylogeny of OR genes extracted from one representative species per vertebrate subclass. Branches are colored according to the vertebrate (sub)class. OR subclades are indicated. The tree was computed using the optimal model found by ModelFinder (JTT+F+R6). The robustness of the nodes was evaluated with 1,000 ultrafast bootstraps and these bootstrap values are reported for each node in Supplementary Fig. 15. All the clades retrieved using the near-ML method were retrieved as monophyletic, and the exact same topology was retrieved.

## OR

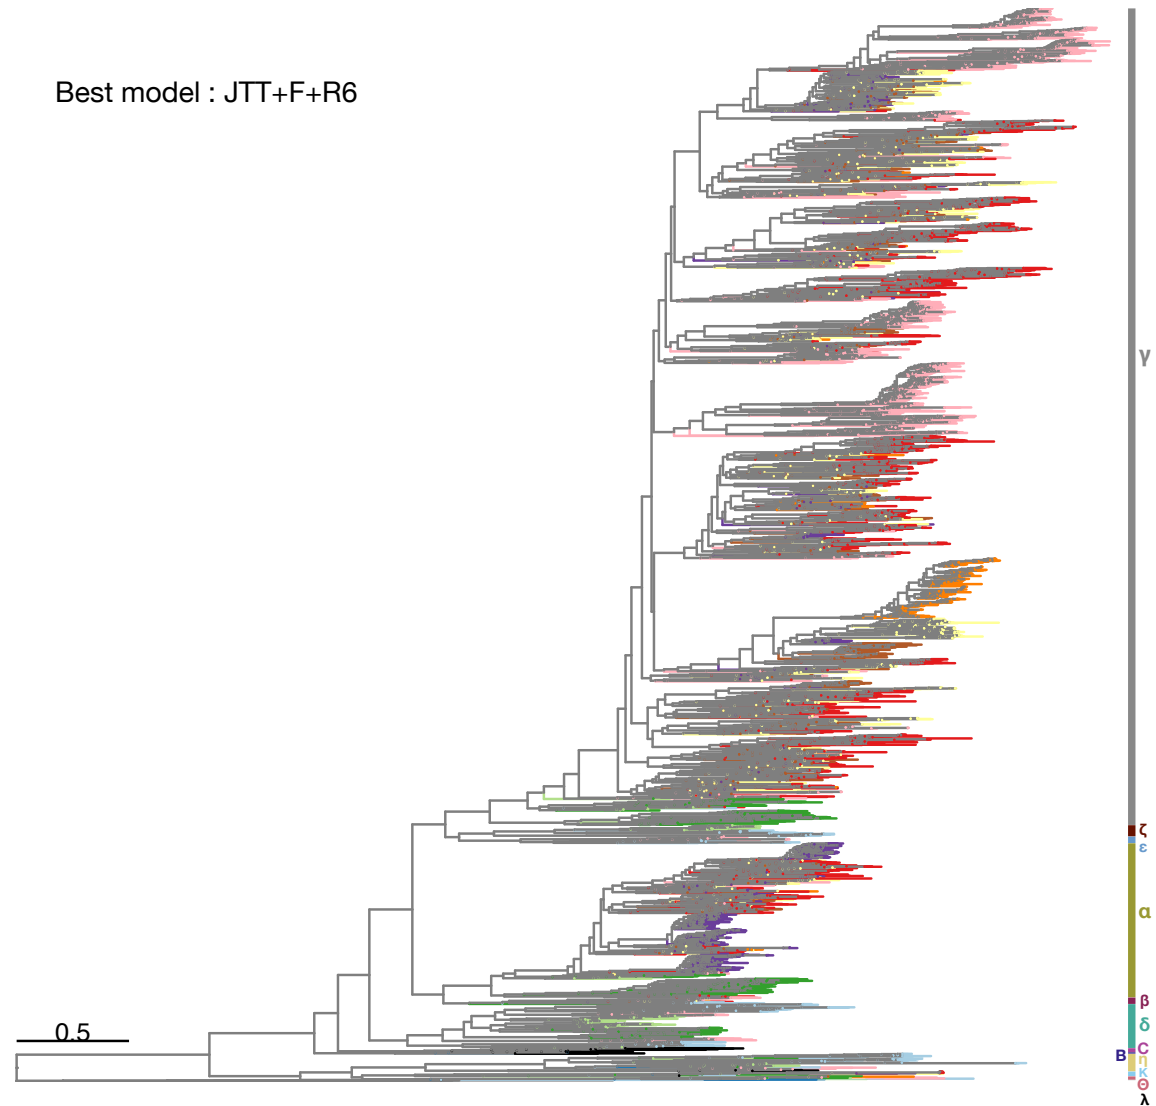

- |                                |                              |                              |
|--------------------------------|------------------------------|------------------------------|
| — <i>Petromyzon marinus</i>    | — <i>Callorhynchus milii</i> | — <i>Danio rerio</i>         |
| — <i>Protopterus annectens</i> | — <i>Xenopus tropicalis</i>  | — <i>Lacerta viridis</i>     |
| — <i>Chelonia mydas</i>        | — <i>Gallus gallus</i>       | — <i>Alligator sinensis</i>  |
|                                |                              | — <i>Latimeria chalumnae</i> |

**Supplementary Fig. 15 | Maximum likelihood phylogeny of *OR* genes.** Same maximum likelihood phylogeny of *OR* genes as in Supplementary Fig. 14 but with bootstrap values indicated at each node.

## OR

Best model : JTT+F+R6

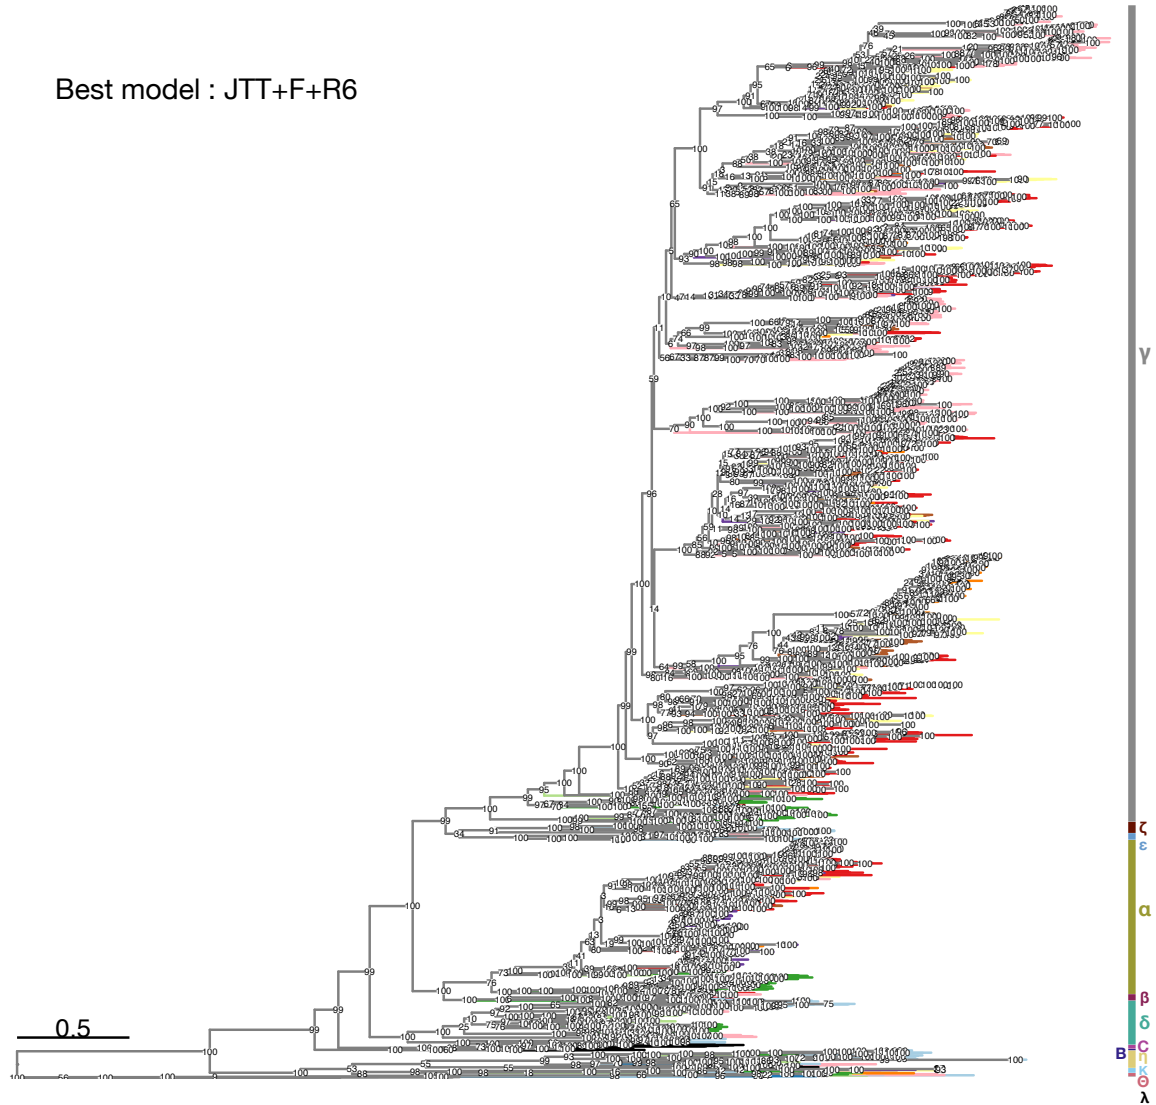

- |                                |                              |                              |
|--------------------------------|------------------------------|------------------------------|
| — <i>Petromyzon marinus</i>    | — <i>Callorhinchus milii</i> | — <i>Danio rerio</i>         |
| — <i>Protopterus annectens</i> | — <i>Xenopus tropicalis</i>  | — <i>Lacerta viridis</i>     |
| — <i>Chelonia mydas</i>        | — <i>Gallus gallus</i>       | — <i>Alligator sinensis</i>  |
|                                |                              | — <i>Latimeria chalumnae</i> |

**Supplementary Fig. 16 | Evolutionary history of *OR* and *TAAR* genes in vertebrates.** **a**, Schematic of the *OR* gene tree (top) indicating the subclades within the *OR* gene family in vertebrates. Gene duplication events leading to subclade divergence are indicated as triangles on the respective branches in the schematic vertebrate phylogeny (left), subclade losses are indicated with the cross symbol below the branches. The numbers refer to nodes in the gene tree. Circles on the right indicate the presence of a particular subclade in a given evolutionary lineage, whereby the size of each circle corresponds to the mean number of complete *OR* genes per species in the respective subclade and lineage. The *OR* gene tree is shown in Supplementary Fig. 13. **b**, Schematic of the *TAAR* gene tree (top) indicating the subclades within the *TAAR* gene family in vertebrates. Gene duplication events are indicated as triangles on the respective branches in the schematic vertebrate phylogeny (left), subclade losses are indicated with the cross symbol. The numbers refer to nodes in the gene tree. Circles on the right indicate the presence of a particular subclade in a given evolutionary lineage, whereby the size of each circle corresponds to the mean number of complete *TAAR* genes per species in the respective subclade and lineage. The *TAAR* gene tree is shown in Supplementary Fig. 17. Subclades present in non-teleost fish but absent in teleosts ( $\alpha$ -subclade for *OR*s and B3-clade for *TAAR*s) are marked with an “\*”. Source data are provided as a Source Data file.

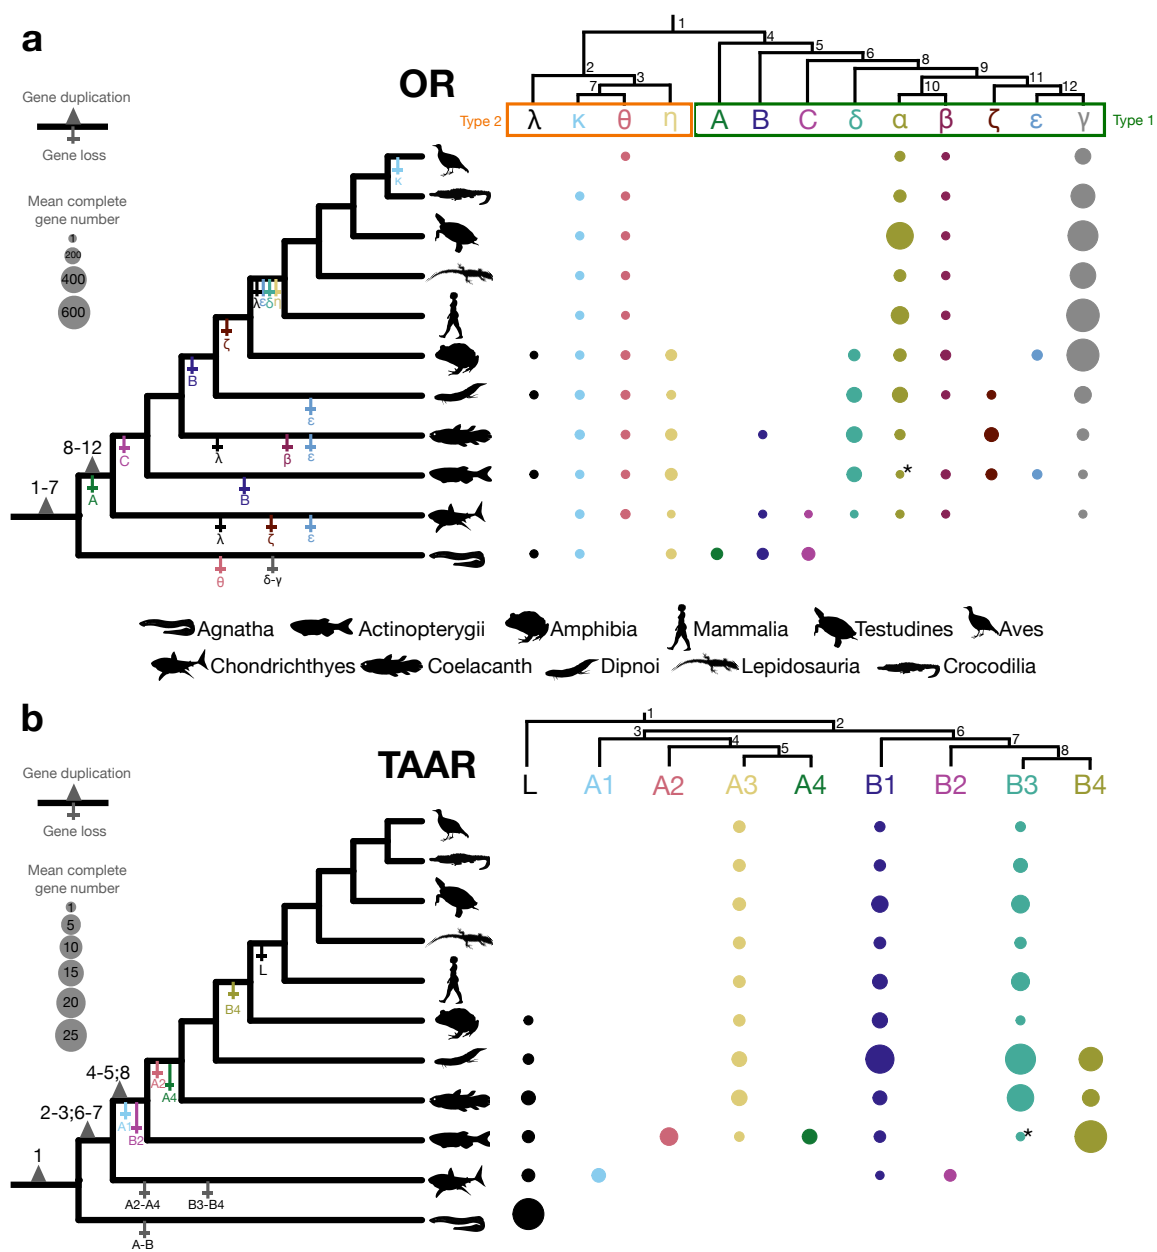

**Supplementary Fig. 17 | Vertebrate *TAAR* gene tree.** **a**, Near maximum likelihood phylogeny of *TAAR* genes in vertebrates with branches colored according to the vertebrate (sub)class. **b**, Clade tree generated from **(a)** with local support values indicated at each node (according to a Shimodaira-Hasegawa test). The gene tree topology was similar to the one presented by Dieris et al.<sup>22</sup>. However, we renamed the *TAAR* gene clades, as the former “class II” clade was not monophyletic according to our analyses. Thus, class I genes are split into four clades, named A1 to A4, while “class II” genes are split into three clades, named B1 to B3. Note that former “class III” clade was retrieved as monophyletic, but we renamed it as B4 in coherence with our new nomenclature. We also kept the name for the *TAAR-like* genes, which is the sister clade of all other vertebrate *TAAR* genes. The tree in newick version, as well as all sequences and the alignment file can be found in FigShare. Sub-trees of each vertebrate (sub)class with the number of *TAAR* genes are shown in Supplementary Fig. 18. Maximum likelihood phylogeny of *TAAR* genes extracted from one species per vertebrate (sub)class is shown in Supplementary Figs. 19-20.

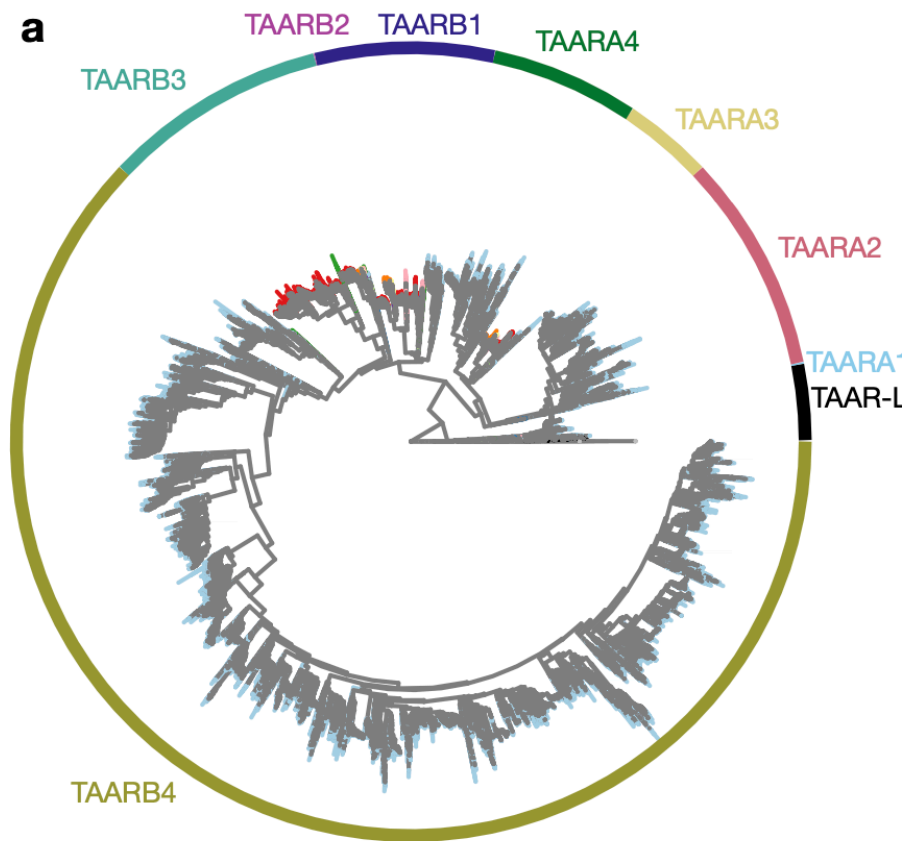

— Agnatha — Chondrichthyes — Actinopterygii — Coelacanth — Dipnoi — Amphibia  
— Mammalia — Lepidosauria — Testudines — Crocodilia — Aves

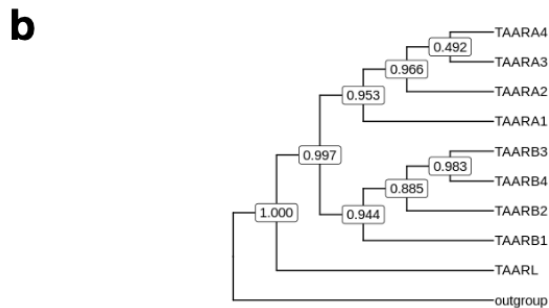

**Supplementary Fig. 18 | Phylogenies showing the number of complete *TAAR* genes.** Vertebrate phylogeny and (sub)class phylogenies displaying the number of complete *TAAR* genes (BUSCO80 dataset). **a**, Vertebrata; **b**, Agnatha; **c**, Chondrichthyes; **d**, Actinopterygii; **e**, Amphibia; **f**, Mammalia; **g**, Lepidosauria; **h**, Testudines; **i**, Aves and Crocodilia. Terminal branches and species names are colored according to (sub)class (**a**) or according to order based on the NCBI taxonomy database (**b-i**). *TAAR*-subclades are indicated. Source data are provided as a Source Data file.

# a) Vertebrates

— Agnatha — Chondrichthyes — Actinopterygii — Coelacanth — Dipnoi — Amphibia  
— Mammalia — Lepidosauria — Turtles — Crocodilia — Aves

TAARB4  
TAARB3  
TAARB2  
TAARB1  
TAARA4  
TAARA3  
TAARA2  
TAARA1  
TAARL

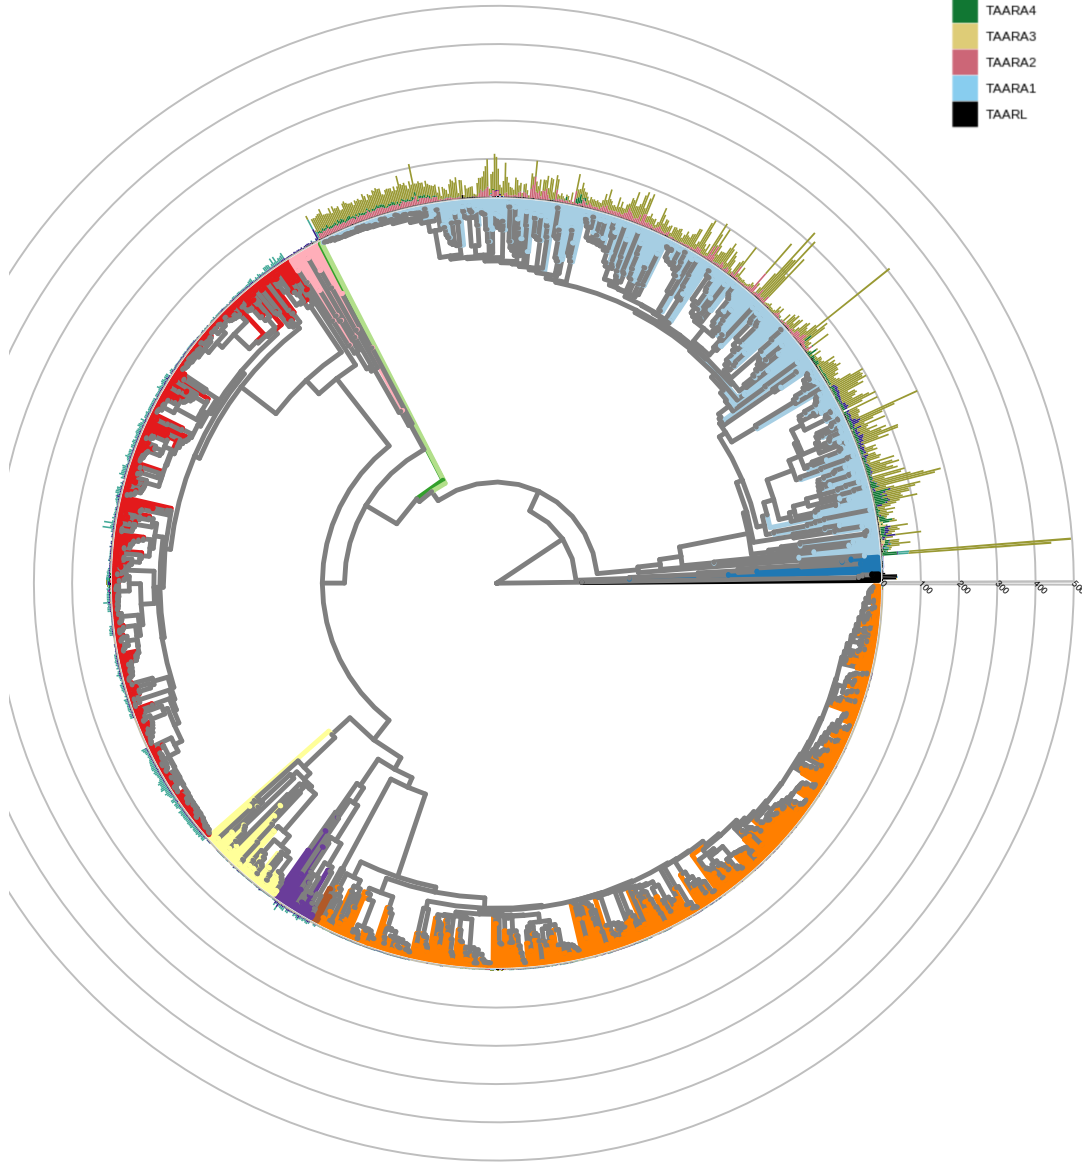

**b) Agnatha**

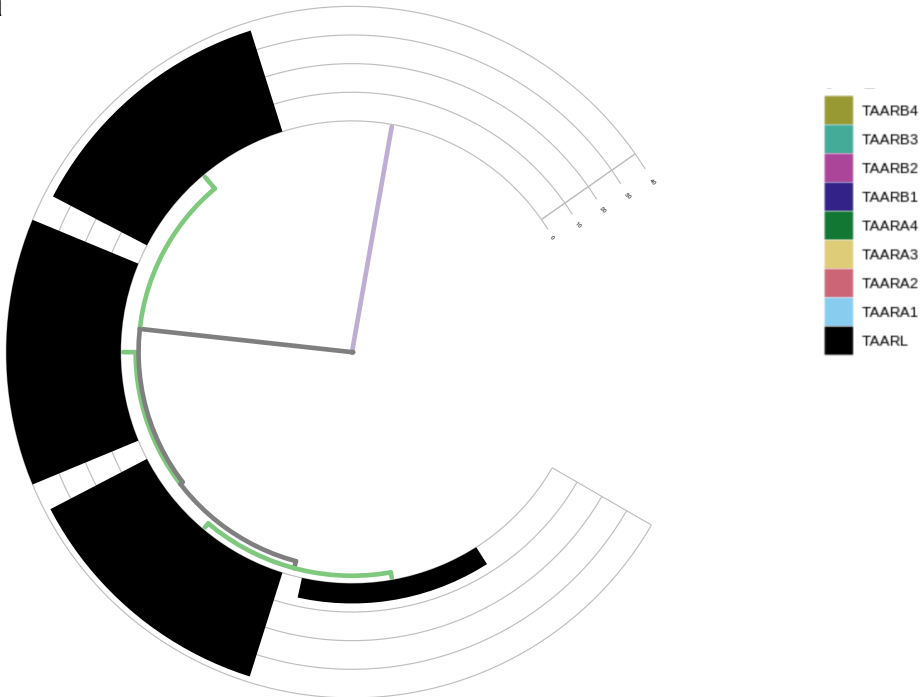

**c) Chondrichthyes**

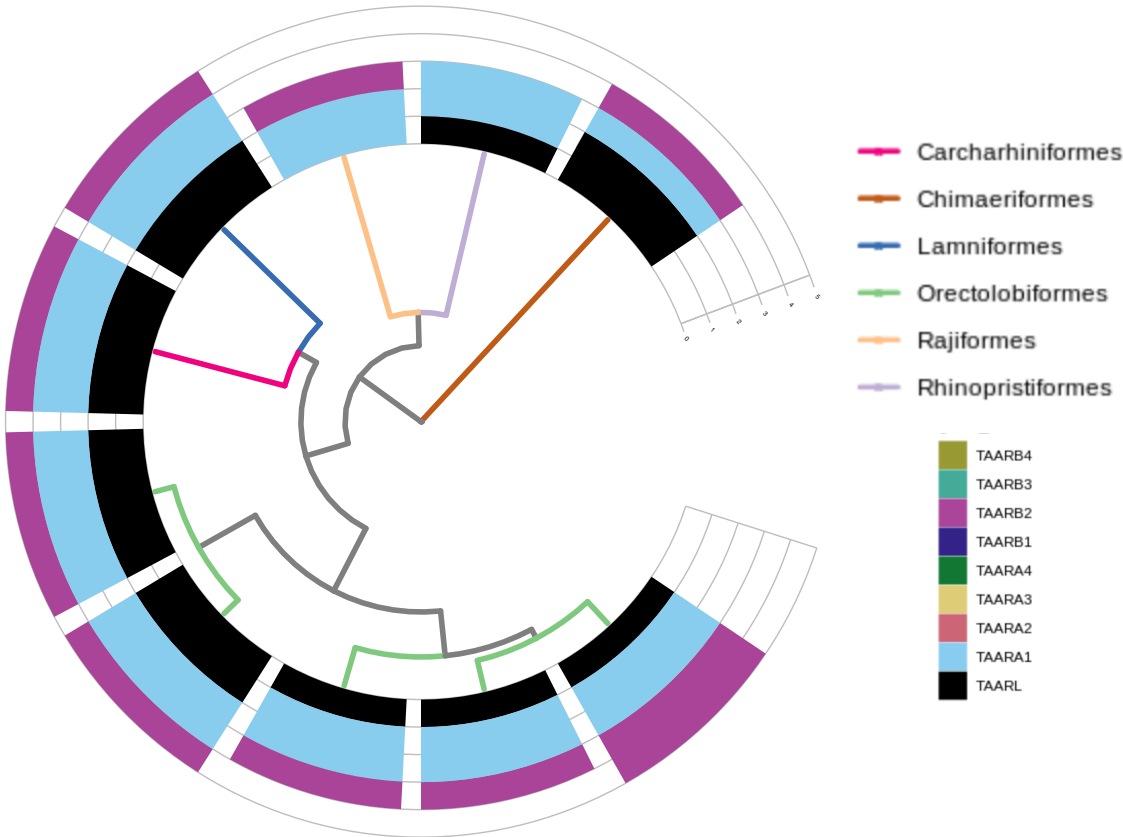



## d) Actinopterygii

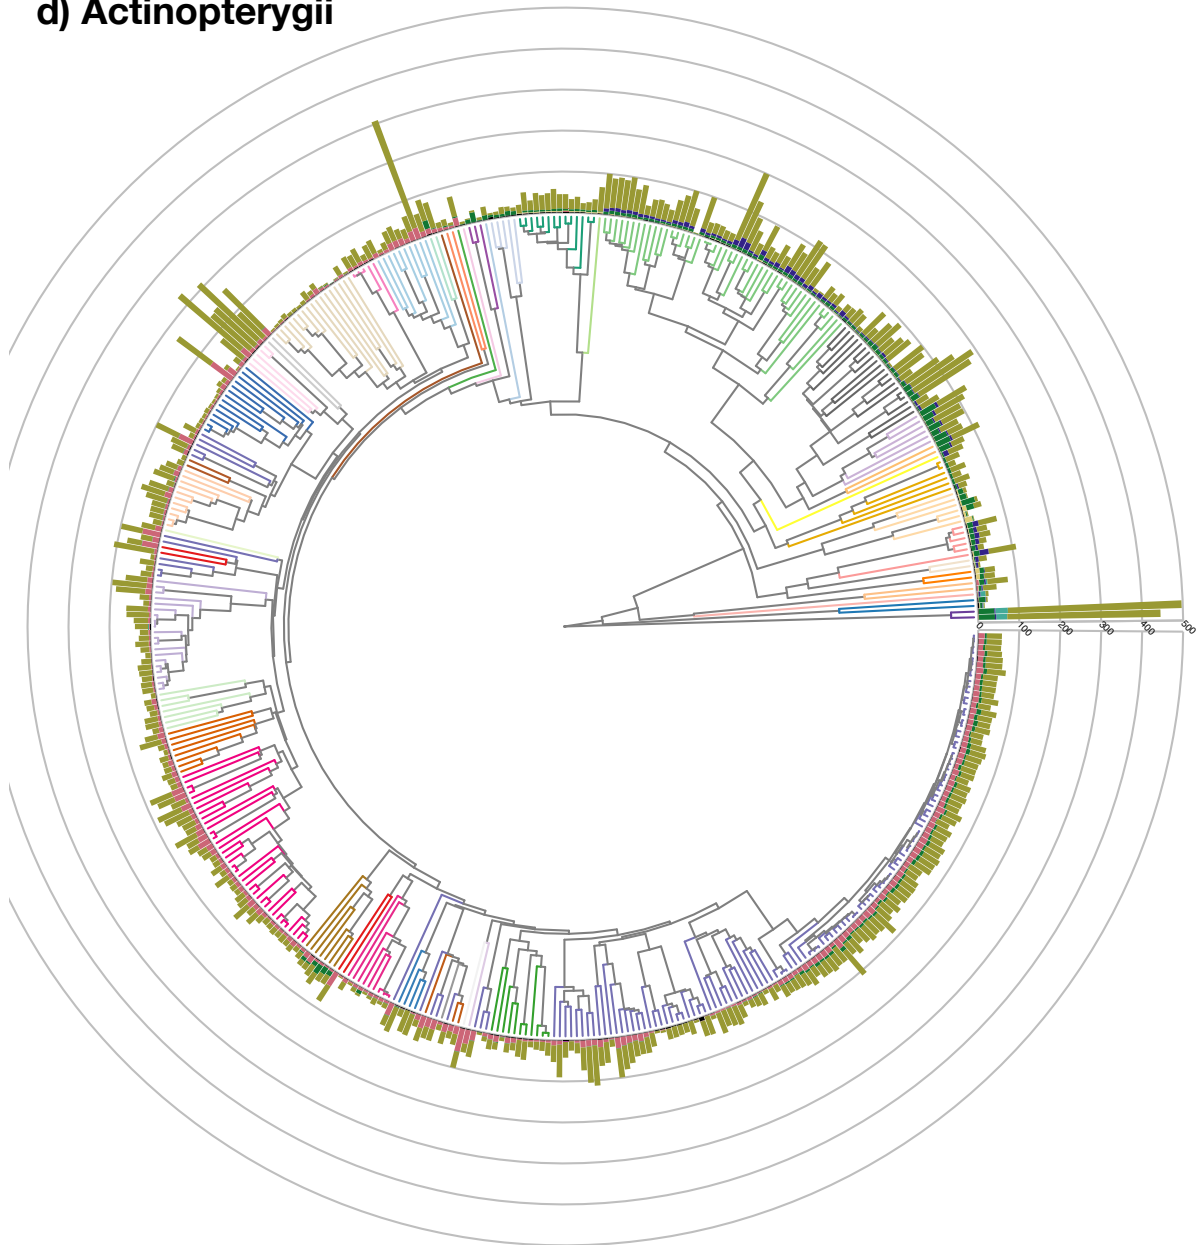

- |                     |                      |                     |
|---------------------|----------------------|---------------------|
| — Acanthuriformes   | — Cypriniformes      | — Lutjaniformes     |
| — Acipenseriformes  | — Cyprinodontiformes | — Mugiliformes      |
| — Albuliformes      | — Elopiformes        | — Ophidiiformes     |
| — Amiiformes        | — Esociformes        | — Osmeriformes      |
| — Anabantiformes    | — Eupercaria         | — Osteoglossiformes |
| — Anguilliformes    | — Gadiformes         | — Perciformes       |
| — Atheriniformes    | — Galaxiiformes      | — Pleuronectiformes |
| — Batrachoidiformes | — Gobiiformes        | — Polypteriformes   |
| — Beloniformes      | — Gonorynchiformes   | — Salmoniformes     |
| — Blenniiformes     | — Gymnotiformes      | — Scombriformes     |
| — Carangiformes     | — Holocentriformes   | — Semionotiformes   |
| — Centrarchiformes  | — Istiophoriformes   | — Siluriformes      |
| — Chaetodontiformes | — Kurtiformes        | — Spariformes       |
| — Characiformes     | — Labriformes        | — Synbranchiformes  |
| — Cichliformes      | — Lampriformes       | — Syngnathiformes   |
| — Clupeiformes      | — Lophiiformes       | — Tetraodontiformes |

- TAARB4
- TAARB3
- TAARB2
- TAARB1
- TAARA4
- TAARA3
- TAARA2
- TAARA1
- TAARL

# e) Amphibia

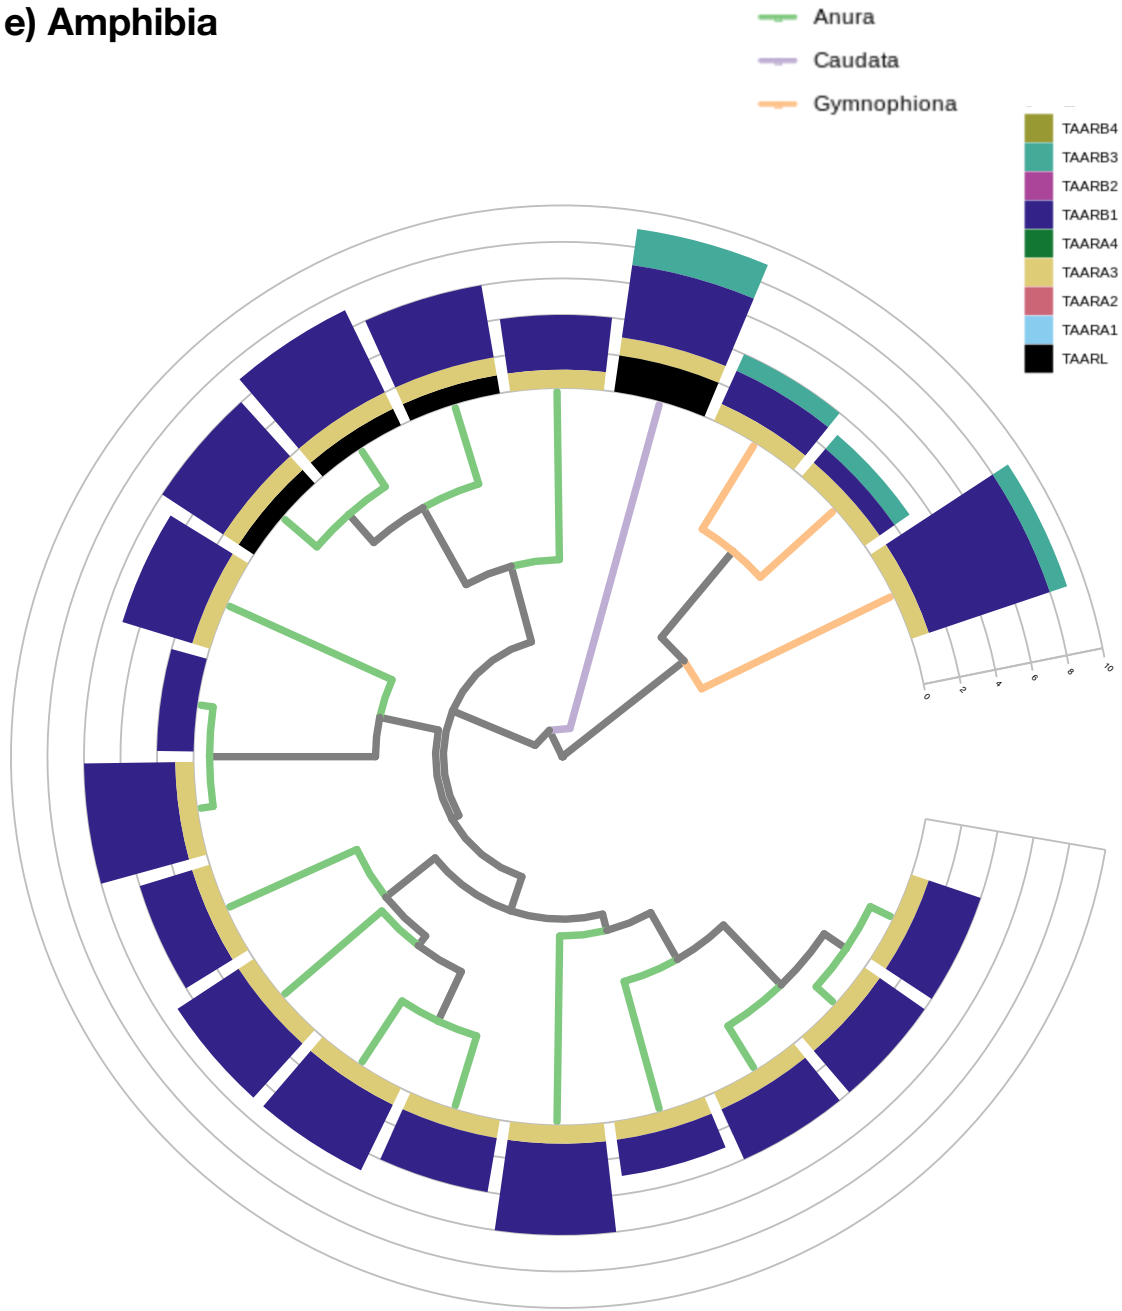

## f) Mammalia

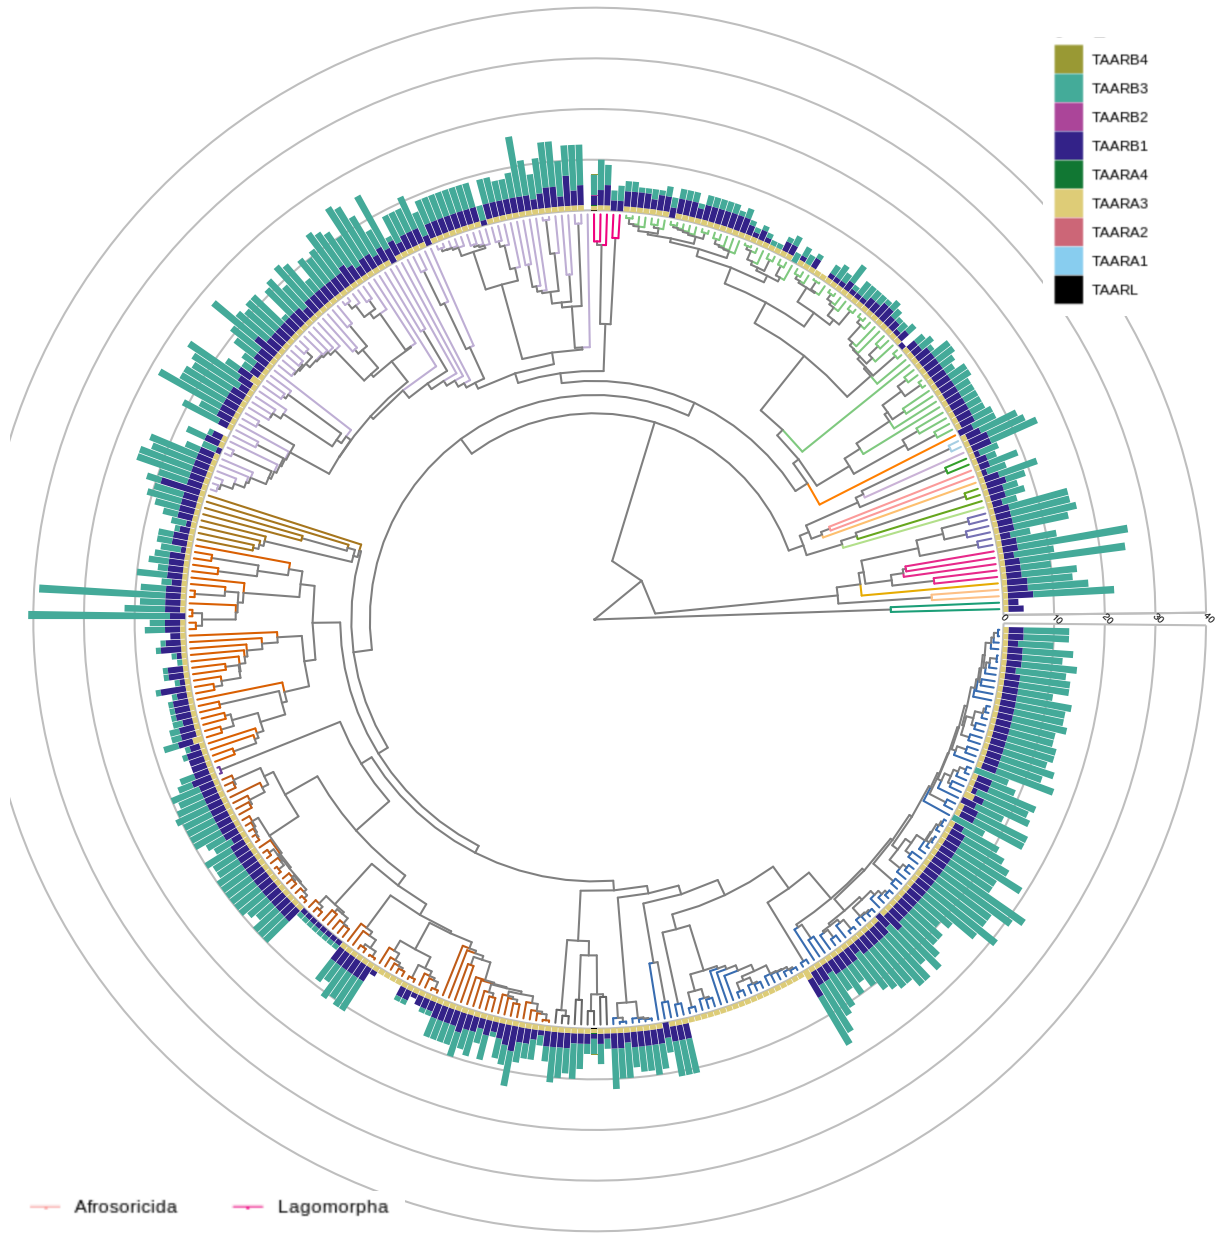

- TAARB4
- TAARB3
- TAARB2
- TAARB1
- TAARA4
- TAARA3
- TAARA2
- TAARA1
- TAARL

- Afrotheria
- Artiodactyla
- Carnivora
- Chiroptera
- Cingulata
- Dasyuromorphia
- Dermoptera
- Didelphimorphia
- Diprotodontia
- Eulipotyphla
- Hyracoidea
- Lagomorpha
- Macroscelidea
- Microbiotheria
- Monotremata
- Perissodactyla
- Pholidota
- Pilosa
- Primates
- Proboscidea
- Rodentia
- Sirenia

**g) Lepidosauria**

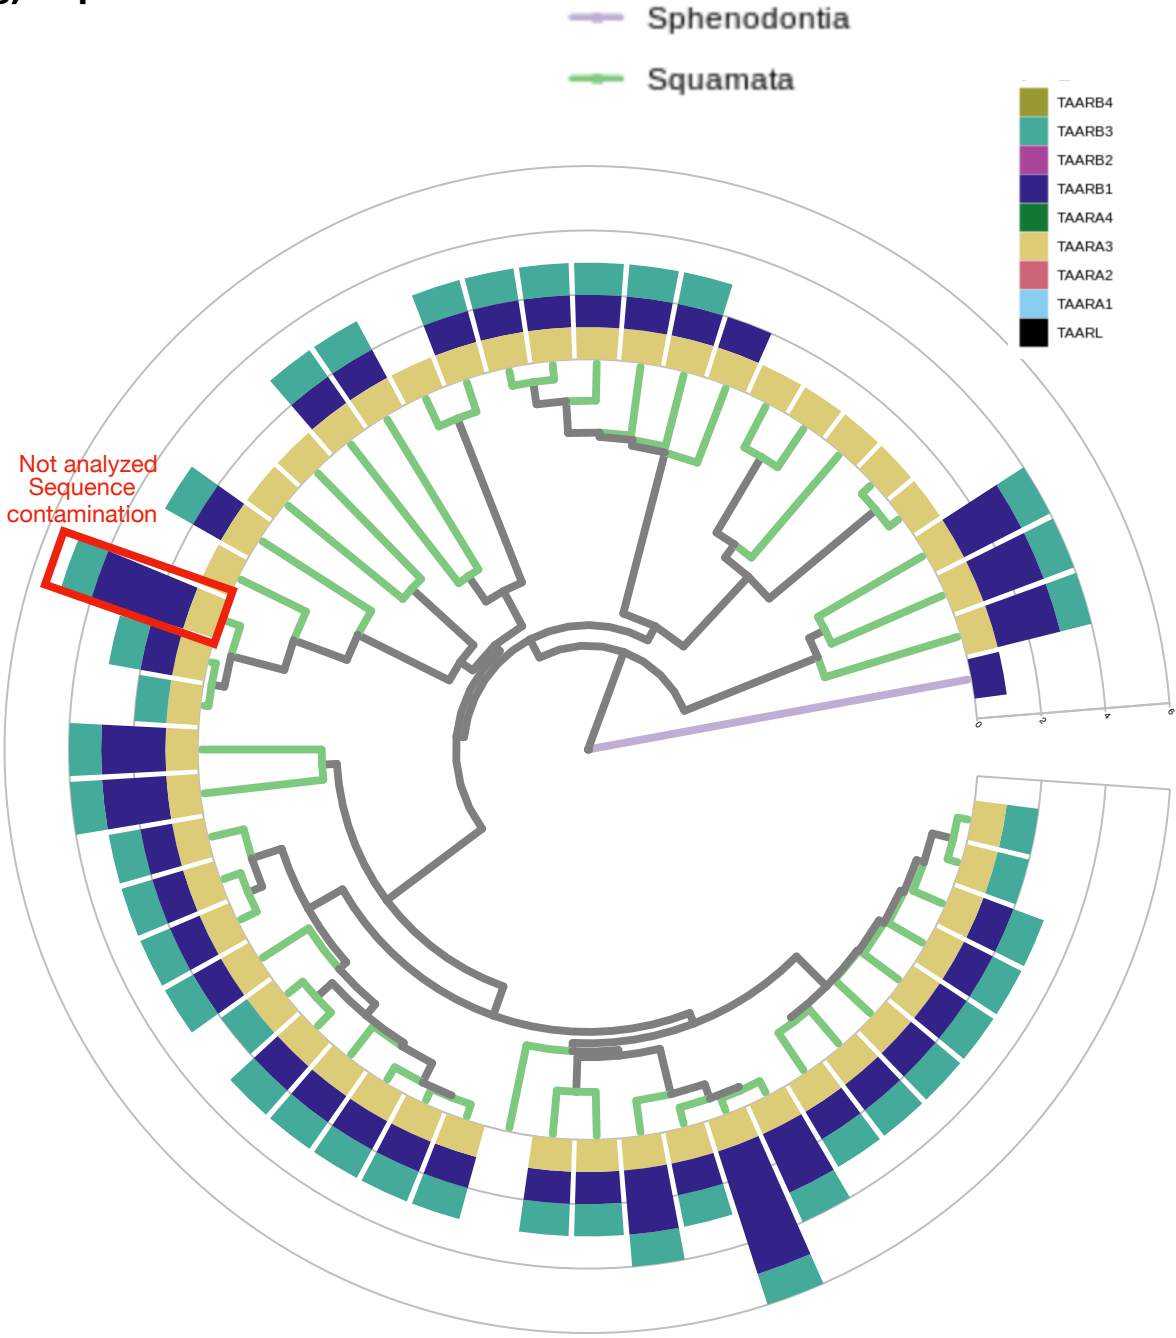

# h) Turtles

— Testudines

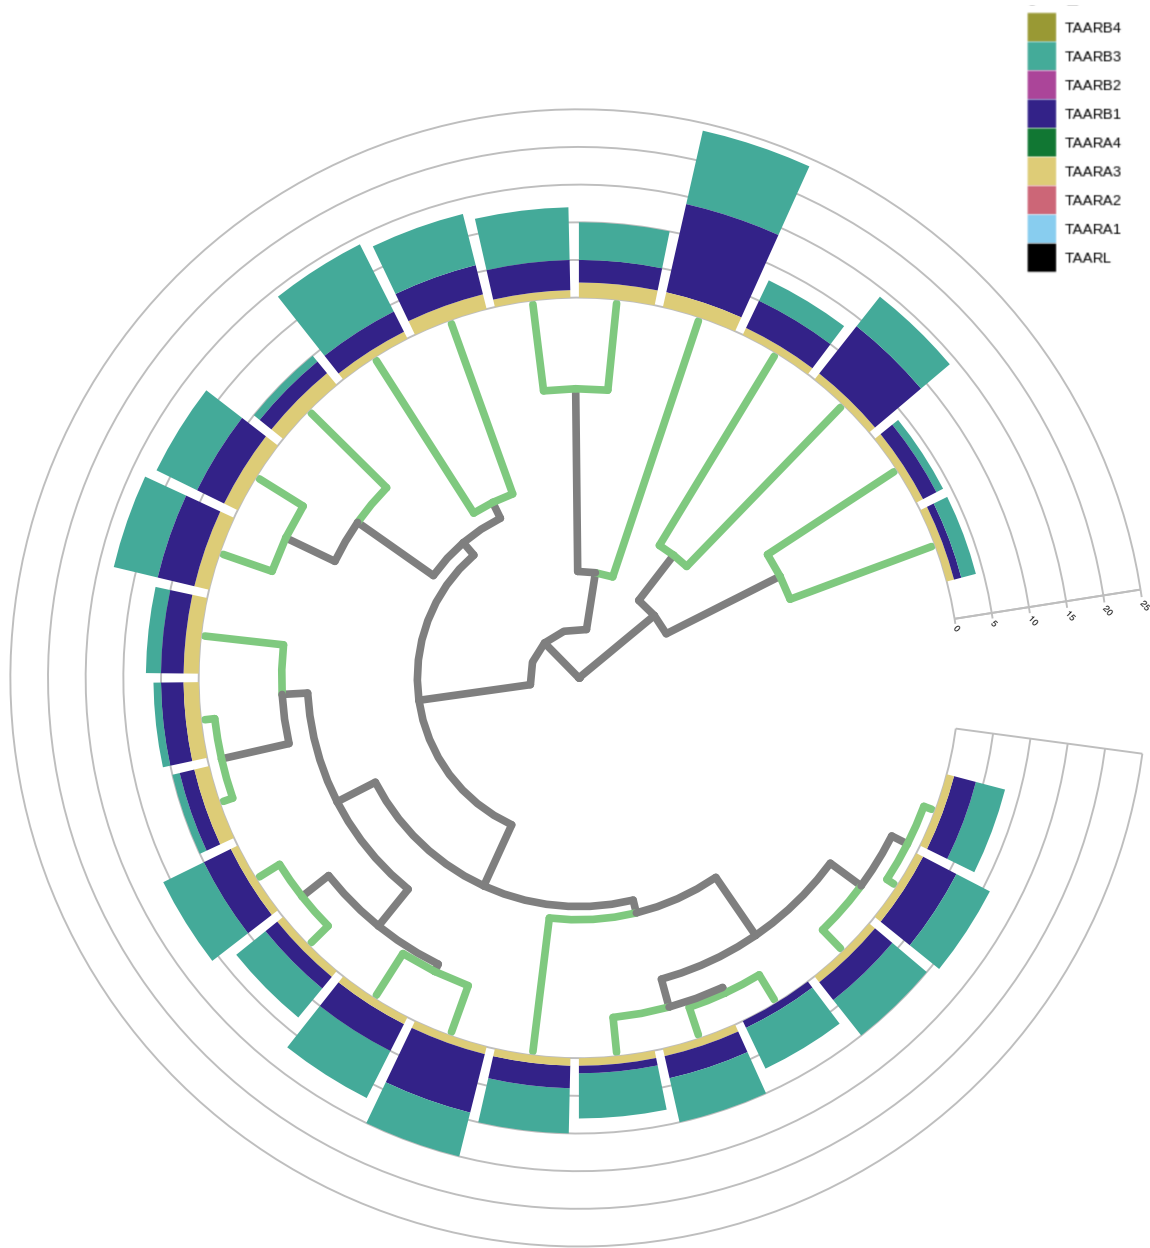

# i) Aves (with Crocodylia as outgroup)

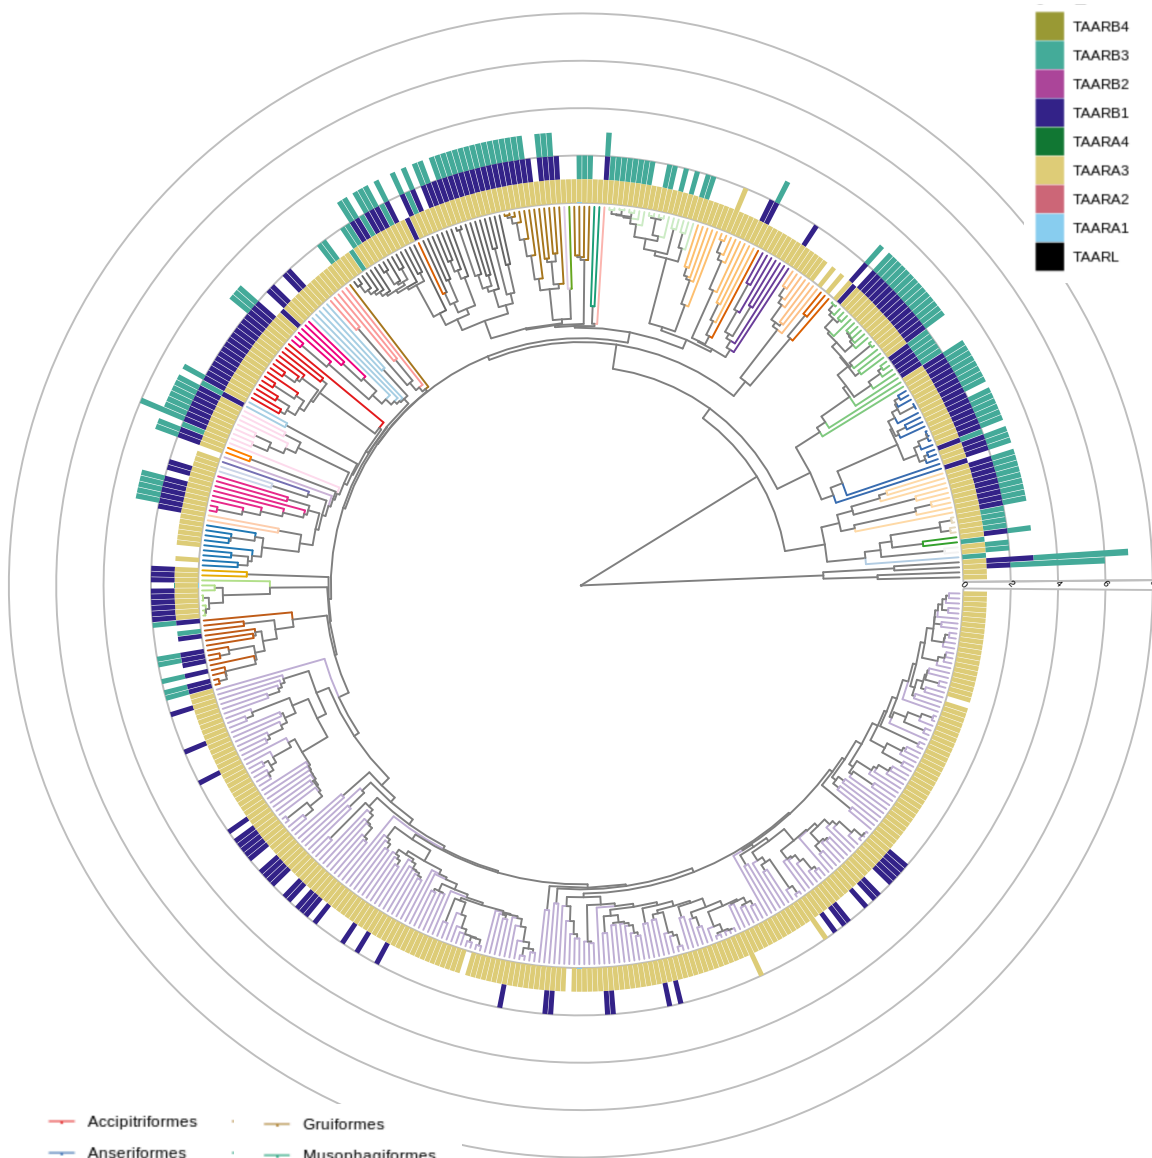

- |                  |                     |
|------------------|---------------------|
| Accipitriformes  | Gruiformes          |
| Anseriformes     | Musophagiformes     |
| Apodiformes      | Opisthocomiformes   |
| Apterygiformes   | Passeriformes       |
| Bucerotiformes   | Pelecaniformes      |
| Caprimulgiformes | Phoenicopteriformes |
| Cariamiformes    | Piciformes          |
| Casuariiformes   | Podicipediformes    |
| Charadriiformes  | Procellariiformes   |
| Ciconiiformes    | Psittaciformes      |
| Coliiformes      | Rheiformes          |
| Columbiformes    | Sphenisciformes     |
| Coraciiformes    | Strigiformes        |
| Cuculiformes     | Struthioniformes    |
| Falconiformes    | Tinamiformes        |
| Galbuliformes    | Trogoniformes       |
| Galliformes      | Upupiformes         |

**Supplementary Fig. 19 | Maximum likelihood phylogeny of *TAAR* genes.** Maximum likelihood phylogeny of *TAAR* genes extracted from one representative species per vertebrate subclass. Branches are colored according to the vertebrate (sub)class. *TAAR* subclades are indicated. *TAARA1* is labeled directly in the phylogenetic tree as there was only one sequence in this clade. The tree was computed using the optimal model found by ModelFinder (LG+I+G). The robustness of the nodes was evaluated with 1,000 ultrafast bootstraps and these bootstrap values are reported for each node in Supplementary Fig. 20. All the clades retrieved using the near-ML method were retrieved as monophyletic, and the exact same topology was retrieved.

## TAAR

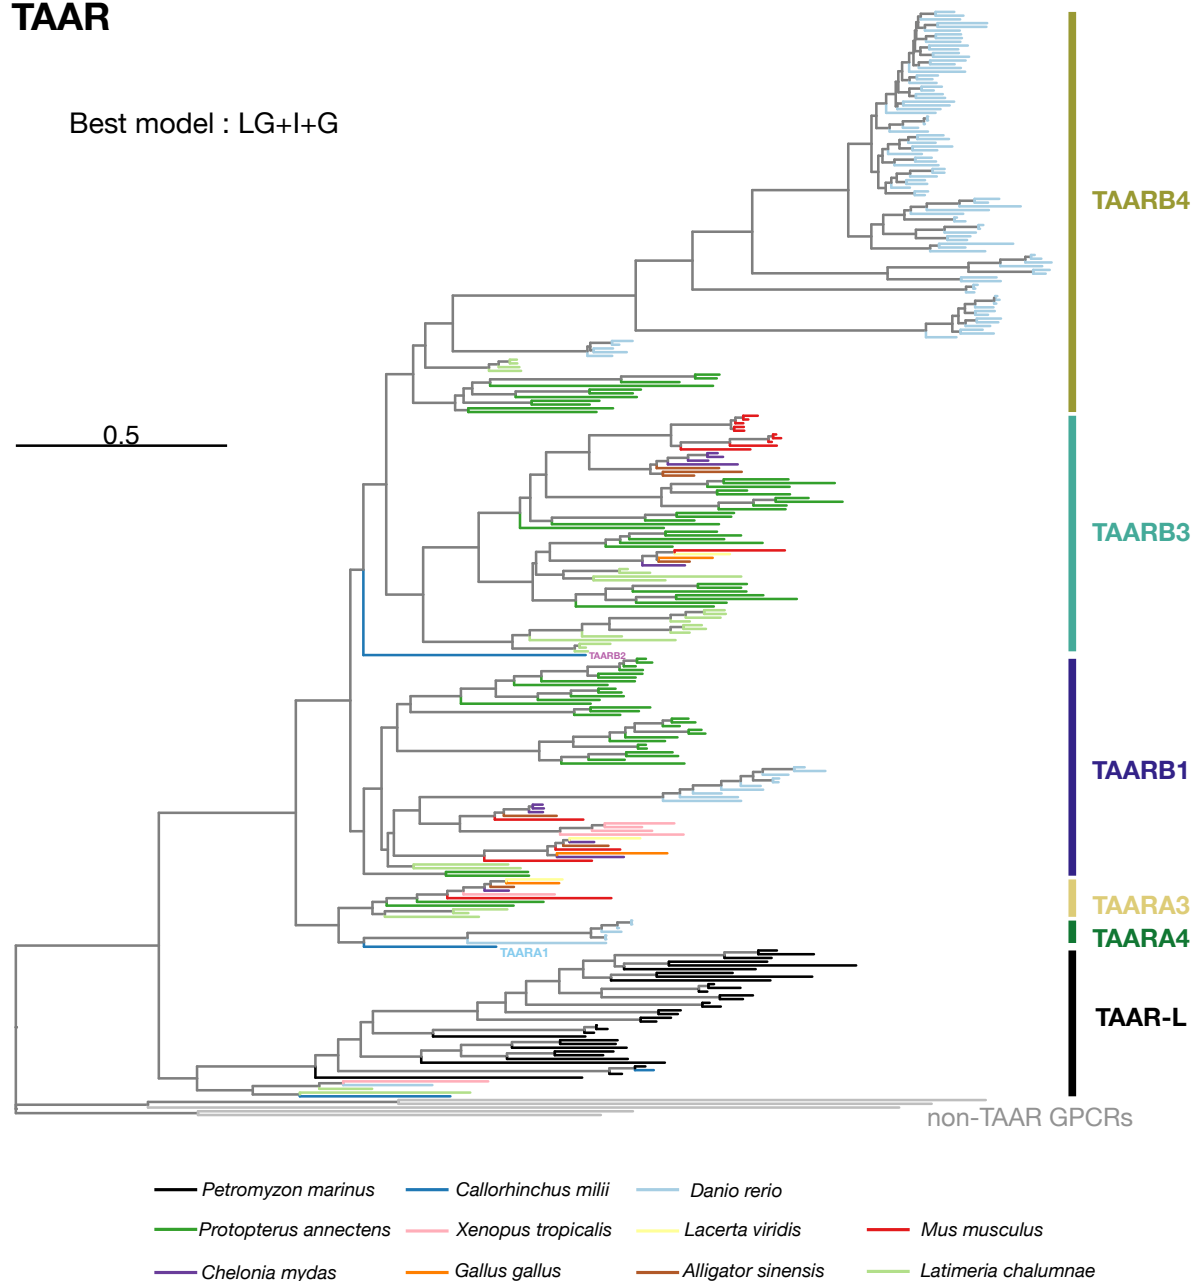

**Supplementary Fig. 20 | Maximum likelihood phylogeny of TAAR genes.** Same maximum likelihood phylogeny of TAAR genes as in Supplementary Fig. 19 but with bootstrap values indicated at each node.

## TAAR

Best model : LG+I+G

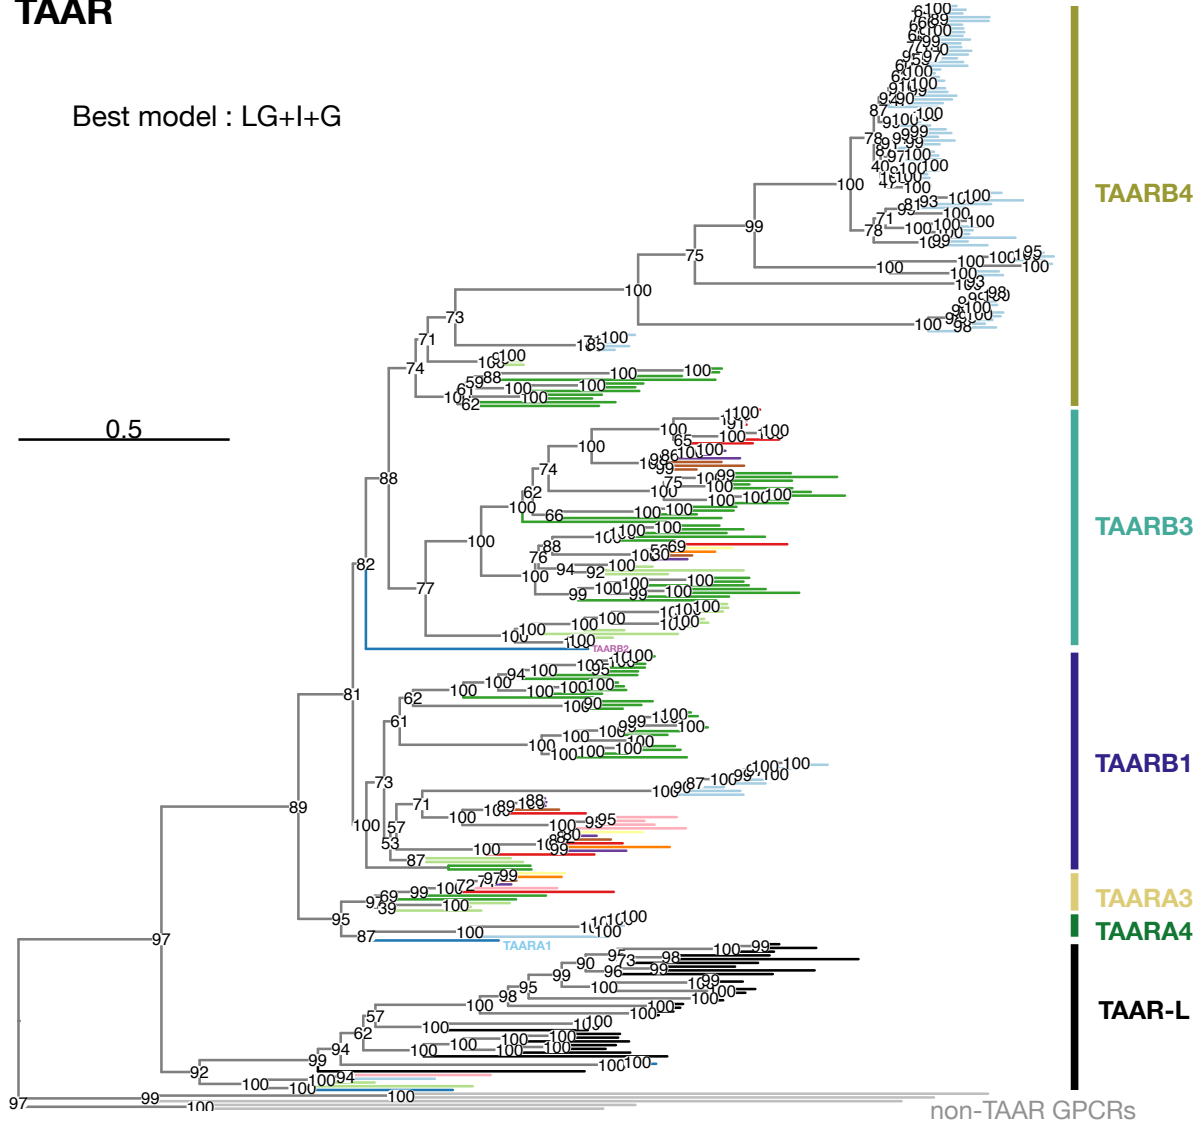

- |                                |                              |                             |                              |
|--------------------------------|------------------------------|-----------------------------|------------------------------|
| — <i>Petromyzon marinus</i>    | — <i>Callorhinchus milii</i> | — <i>Danio rerio</i>        |                              |
| — <i>Protopterus annectens</i> | — <i>Xenopus tropicalis</i>  | — <i>Lacerta viridis</i>    | — <i>Mus musculus</i>        |
| — <i>Chelonia mydas</i>        | — <i>Gallus gallus</i>       | — <i>Alligator sinensis</i> | — <i>Latimeria chalumnae</i> |



**Supplementary Fig. 21 | Phylogenies showing the number of complete *VIR* genes.** Vertebrate phylogeny and (sub)class phylogenies displaying the number of complete *VIR* genes (BUSCO80 dataset). **a**, Vertebrata; **b**, Agnatha; **c**, Chondrichthyes; **d**, Actinopterygii; **e**, Amphibia; **f**, Mammalia; **g**, Lepidosauria; **h**, Testudines; **i**, Aves and Crocodylia. Terminal branches and species names are colored according to (sub)class (**a**) or according to order based on the NCBI taxonomy database (**b-i**). *VIR*-subclades are indicated. Source data are provided as a Source Data file.

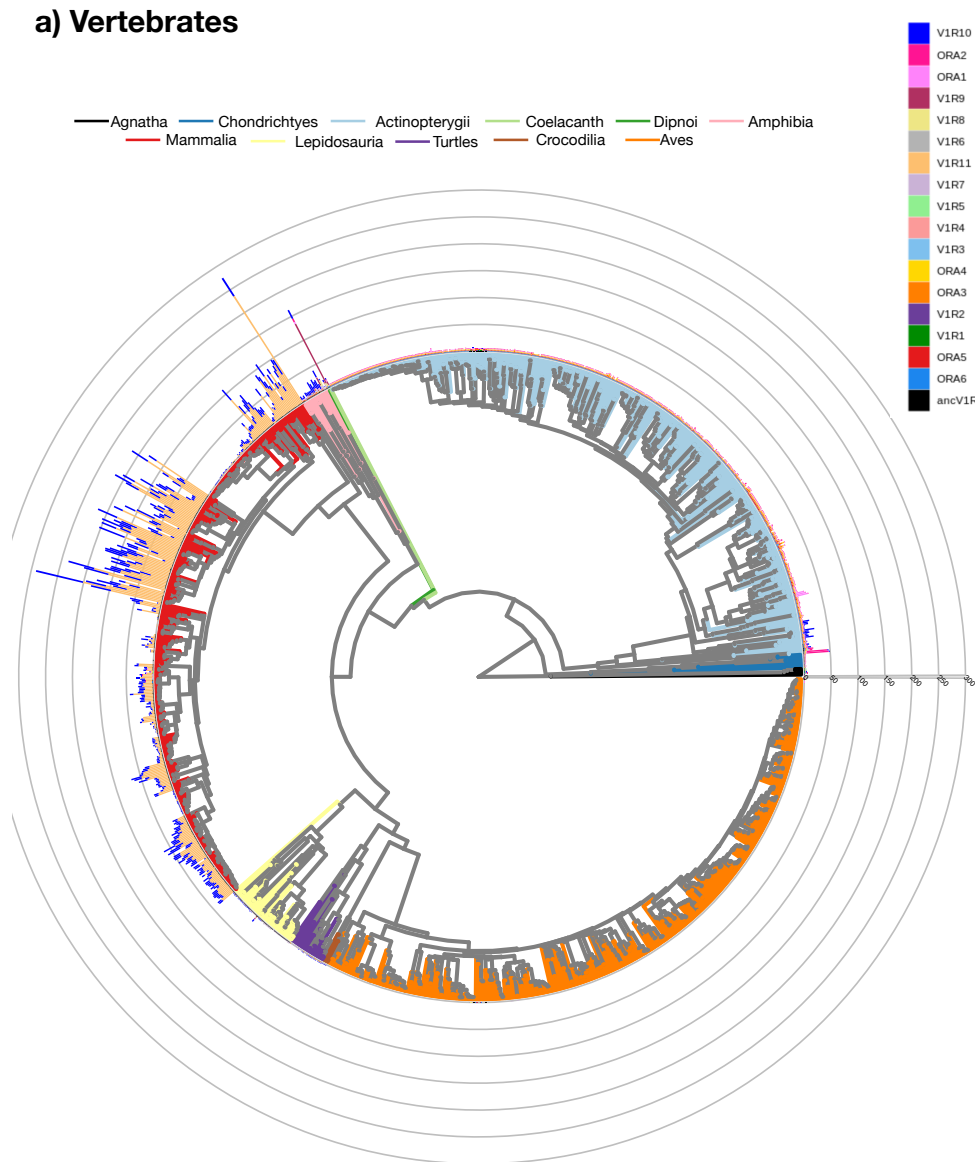

**b) Agnatha**

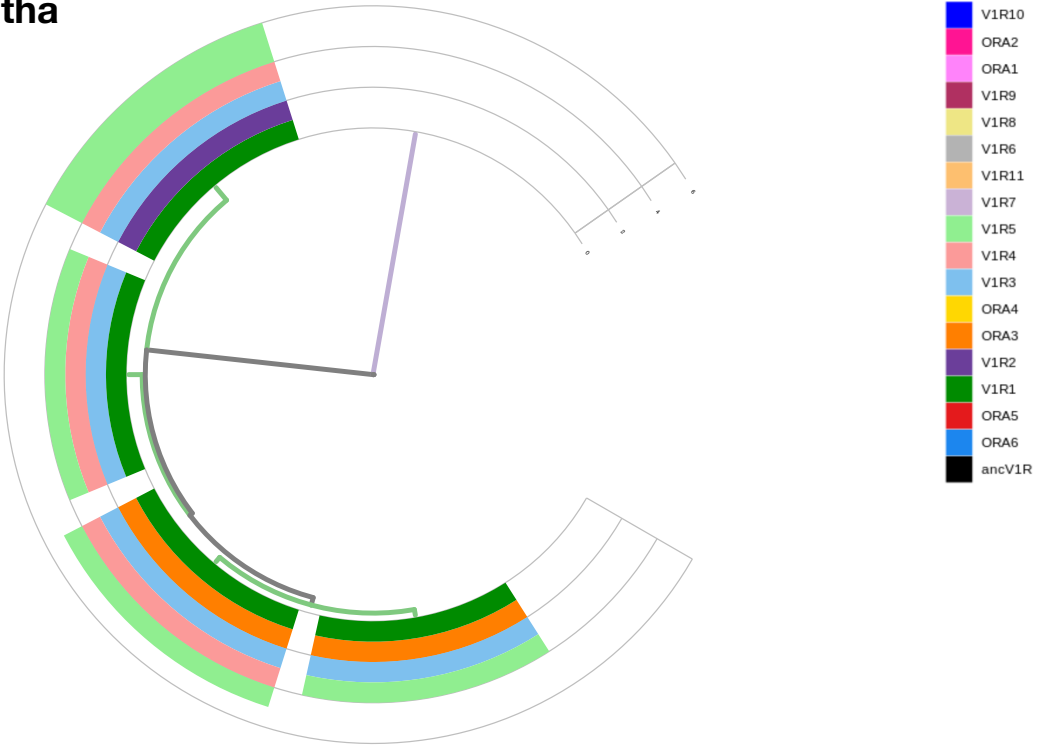

**c) Chondrichthyes**

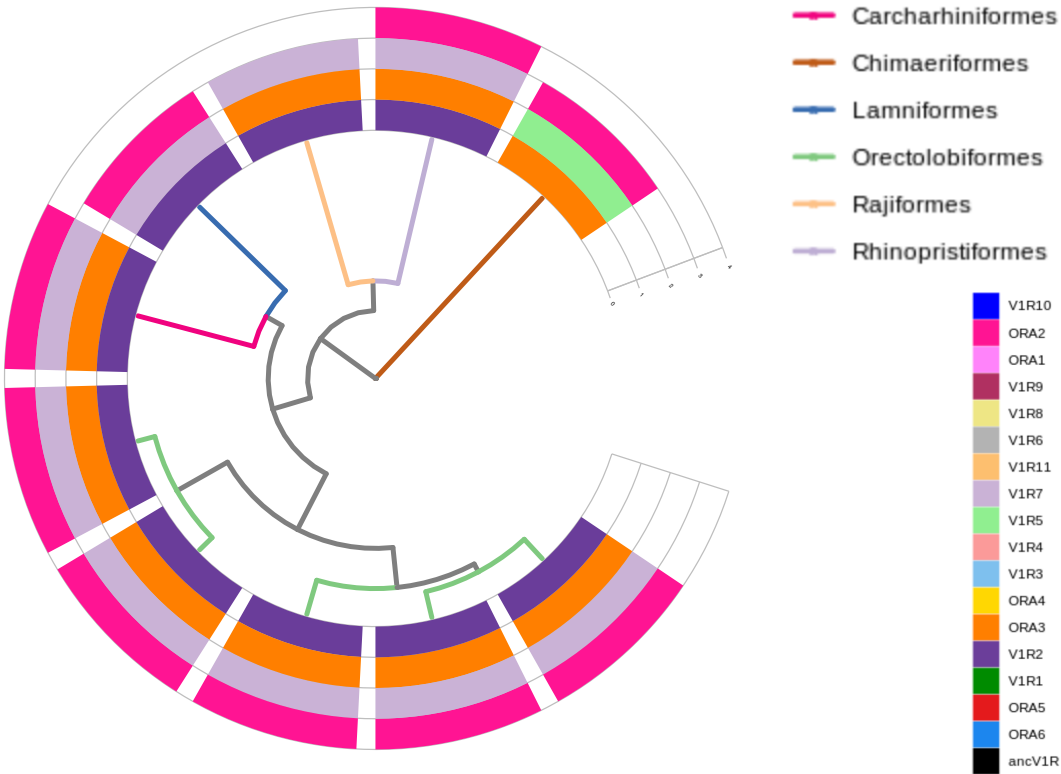

## d) Actinopterygii

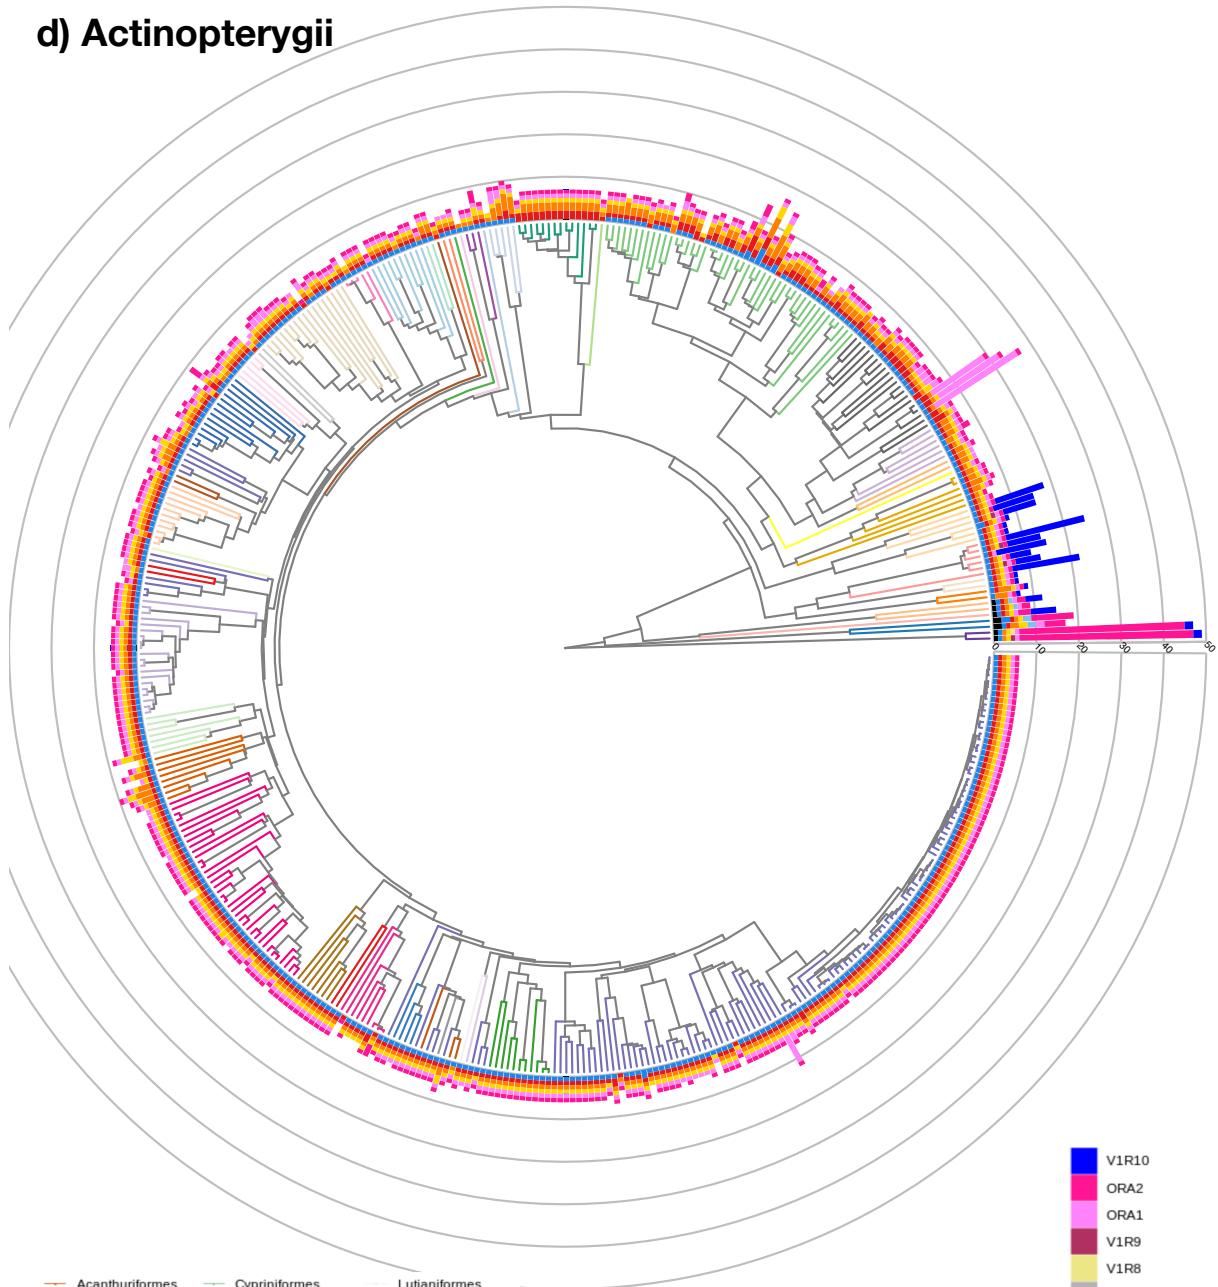

- |                     |                      |                     |
|---------------------|----------------------|---------------------|
| — Acanthuriformes   | — Cypriniformes      | — Lutjaniformes     |
| — Acipenseriformes  | — Cyprinodontiformes | — Mugiliformes      |
| — Albuliformes      | — Elopiformes        | — Ophidiiformes     |
| — Amiiformes        | — Esociformes        | — Osmeriformes      |
| — Anabantiformes    | — Eupercaria         | — Osteoglossiformes |
| — Anguilliformes    | — Gadiformes         | — Perciformes       |
| — Atheriniformes    | — Galaxiiformes      | — Pleuronectiformes |
| — Batrachoidiformes | — Gobiiformes        | — Polypteriformes   |
| — Beloniformes      | — Gonorynchiformes   | — Salmoniformes     |
| — Blenniiformes     | — Gymnotiformes      | — Scombriformes     |
| — Carangiformes     | — Holocentriformes   | — Semionotiformes   |
| — Centrarchiformes  | — Istiophoriformes   | — Siluriformes      |
| — Chaetodontiformes | — Kurtiformes        | — Spariformes       |
| — Characiformes     | — Labriformes        | — Synbranchiformes  |
| — Cichliformes      | — Lampriformes       | — Syngnathiformes   |
| — Clupeiformes      | — Lophiiformes       | — Tetraodontiformes |

- V1R10
- ORA2
- ORA1
- V1R9
- V1R8
- V1R6
- V1R11
- V1R7
- V1R5
- V1R4
- V1R3
- ORA4
- ORA3
- V1R2
- V1R1
- ORA5
- ORA6
- ancV1R

# e) Amphibia

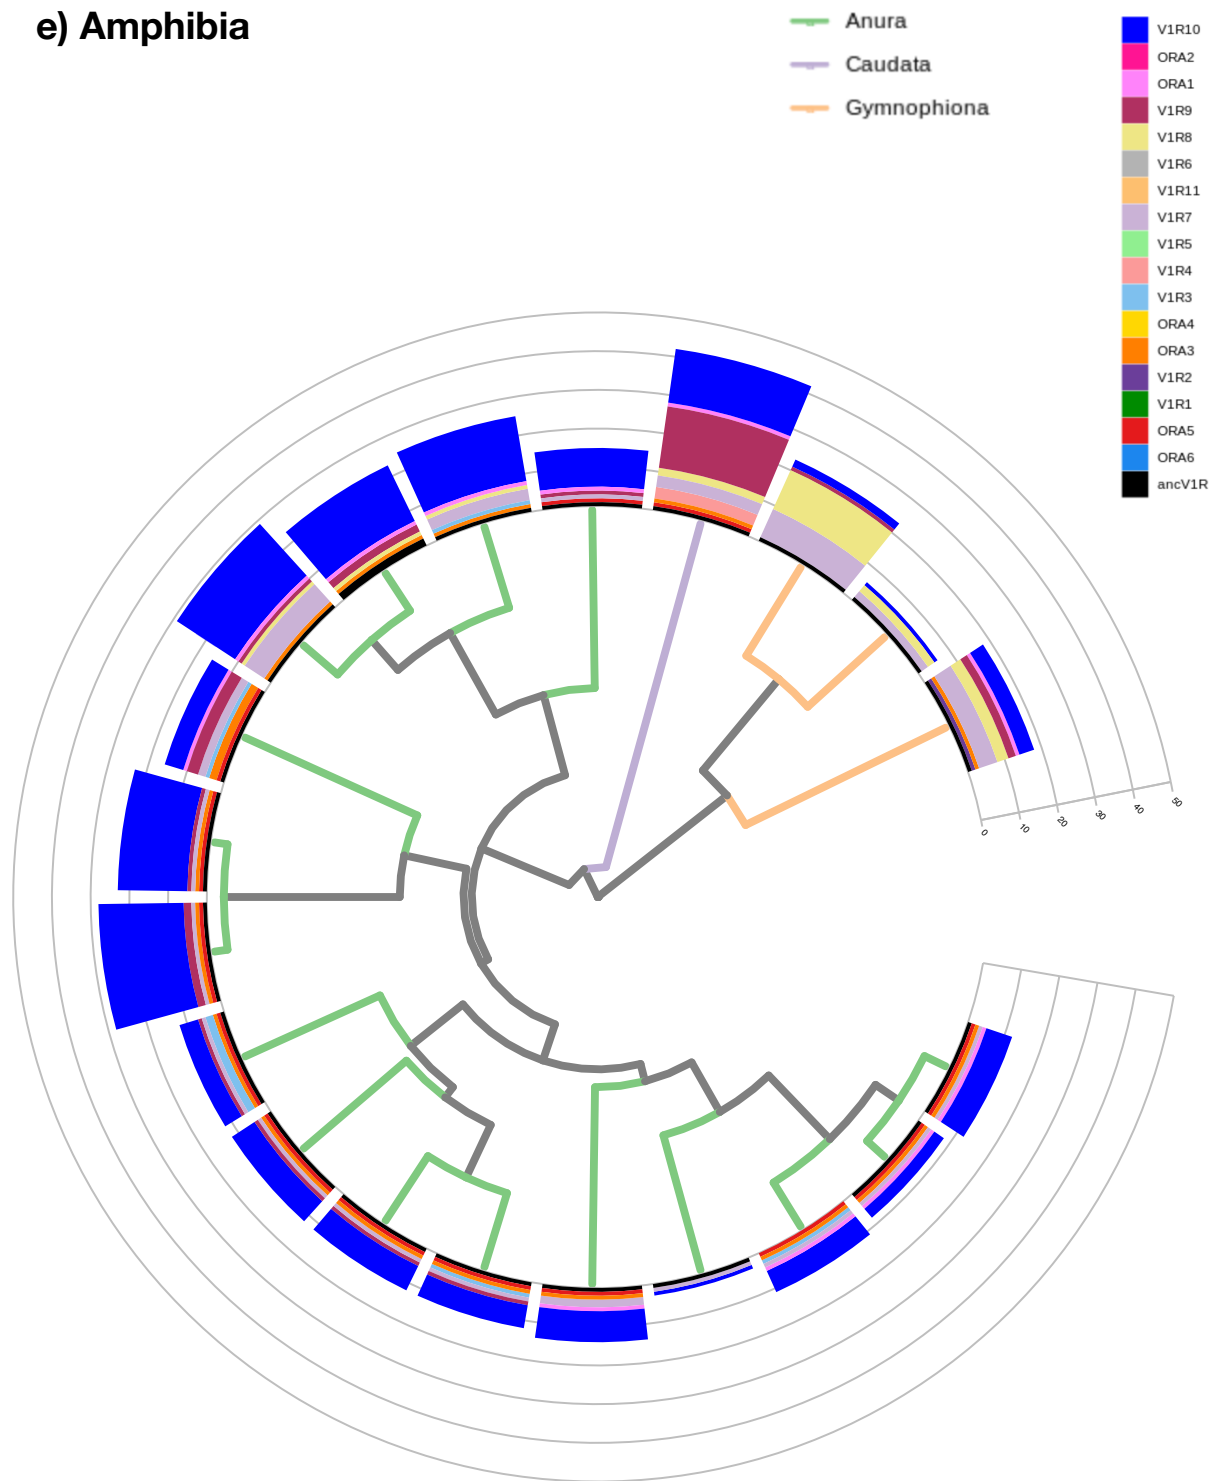

## f) Mammalia

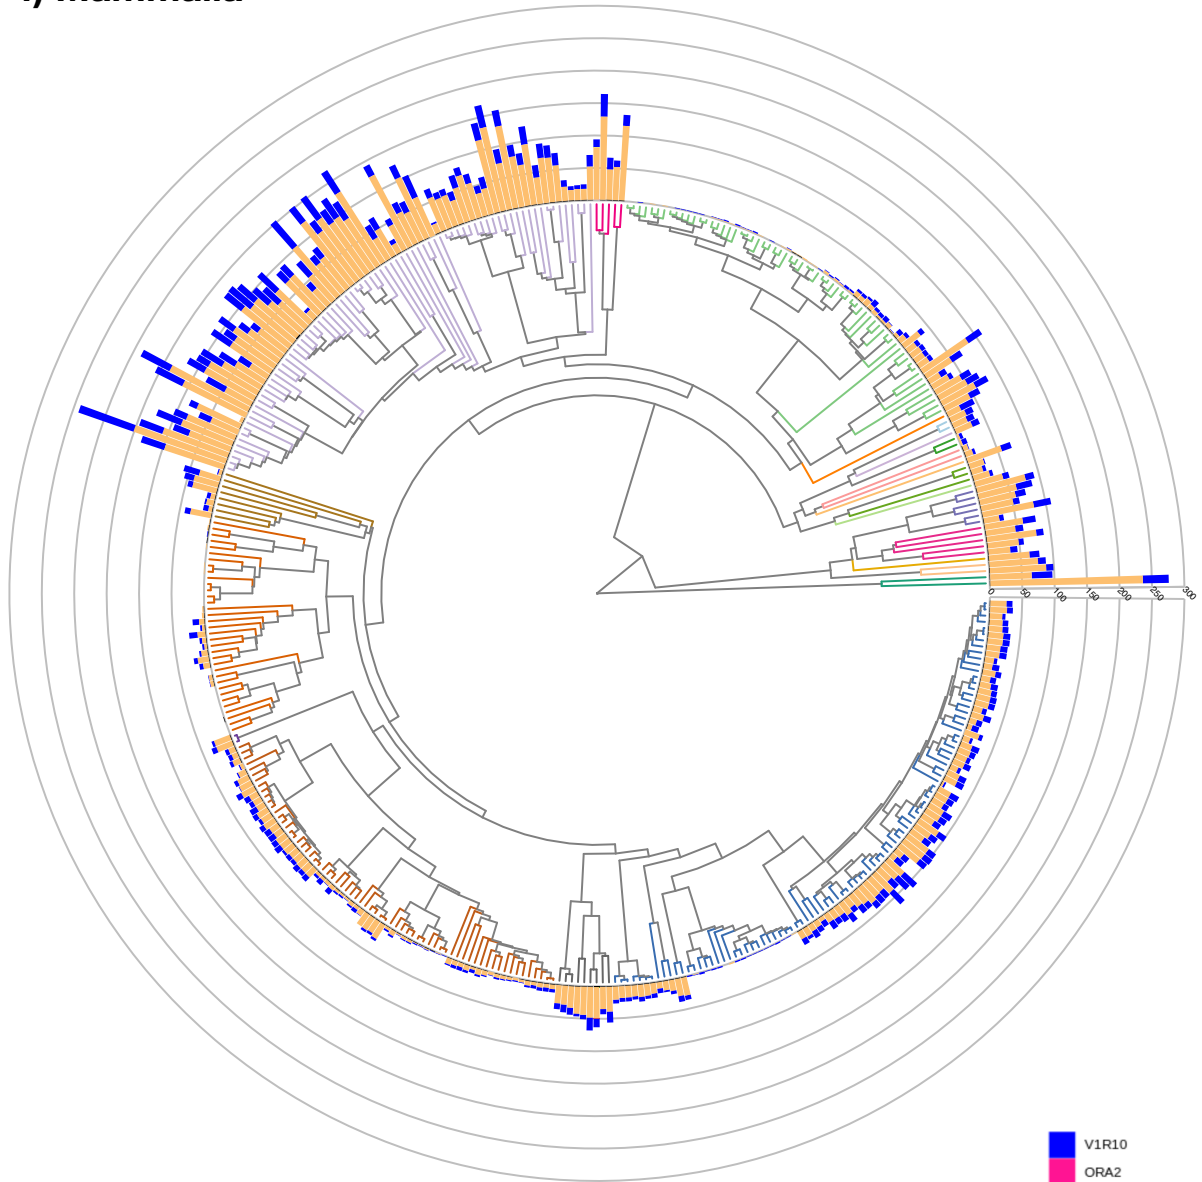

- |                   |                  |
|-------------------|------------------|
| — Afrosoricida    | — Lagomorpha     |
| — Artiodactyla    | — Macroscelidea  |
| — Carnivora       | — Microbiotheria |
| — Chiroptera      | — Monotremata    |
| — Cingulata       | — Perissodactyla |
| — Dasyuromorphia  | — Pholidota      |
| — Dermoptera      | — Pilosa         |
| — Didelphimorphia | — Primates       |
| — Diprotodontia   | — Proboscidea    |
| — Eulipotyphla    | — Rodentia       |
| — Hyracoidea      | — Sirenia        |

- |          |
|----------|
| ■ V1R10  |
| ■ ORA2   |
| ■ ORA1   |
| ■ V1R9   |
| ■ V1R8   |
| ■ V1R6   |
| ■ V1R11  |
| ■ V1R7   |
| ■ V1R5   |
| ■ V1R4   |
| ■ V1R3   |
| ■ ORA4   |
| ■ ORA3   |
| ■ V1R2   |
| ■ V1R1   |
| ■ ORA5   |
| ■ ORA6   |
| ■ ancV1R |

# g) Lepidosauria

Sphenodontia  
Squamata

- V1R10
- ORA2
- ORA1
- V1R9
- V1R8
- V1R6
- V1R11
- V1R7
- V1R5
- V1R4
- V1R3
- ORA4
- ORA3
- V1R2
- V1R1
- ORA5
- ORA6
- ancV1R

Not analyzed  
Sequence contamination

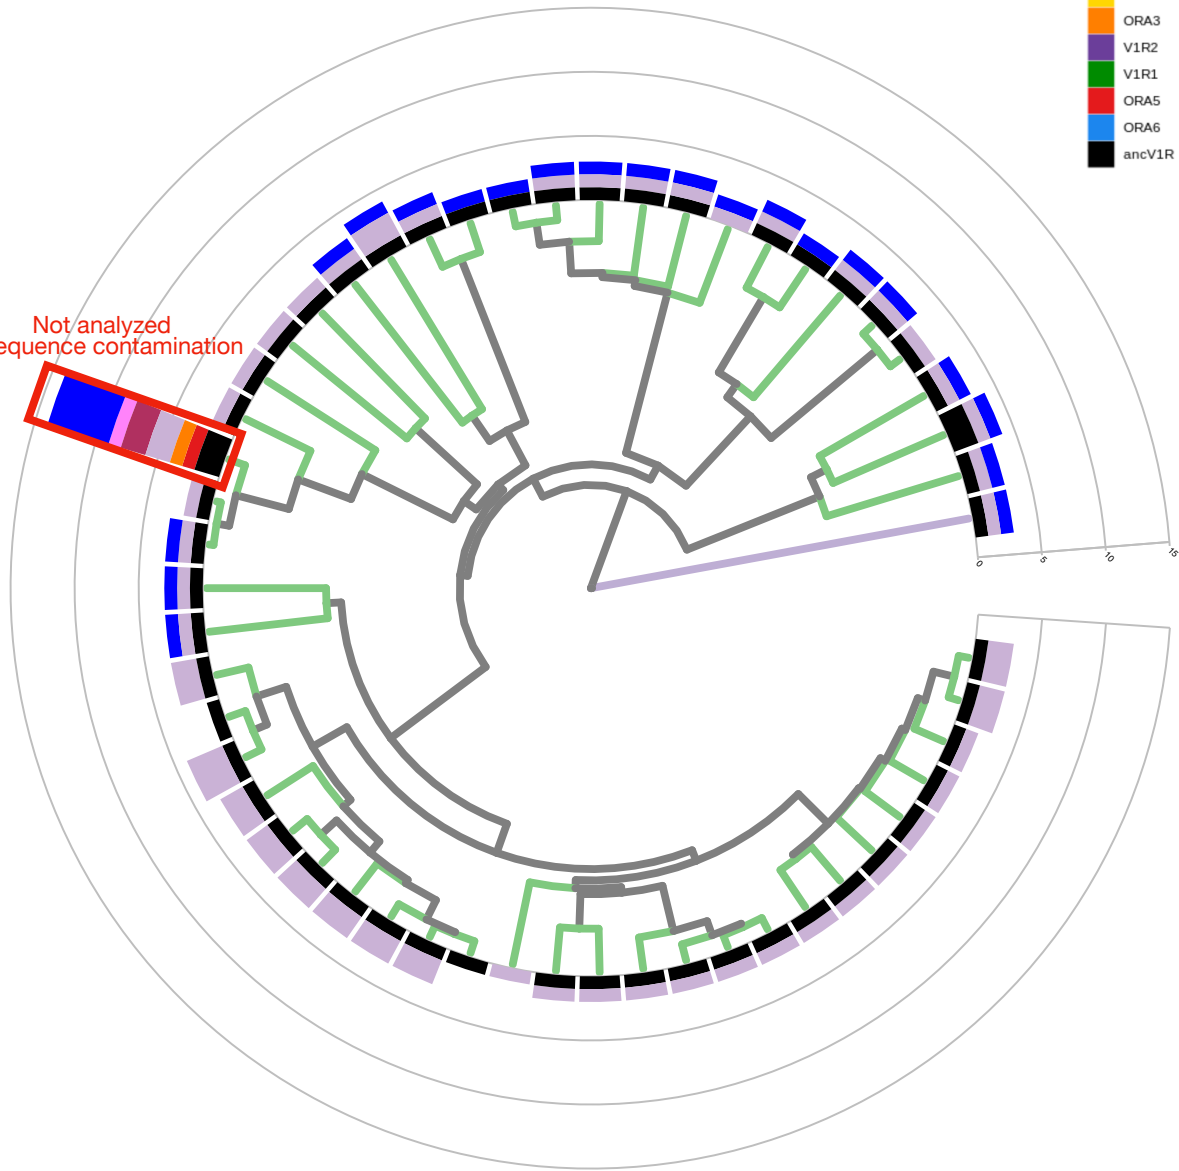

# h) Turtles

— Testudines

- V1R10
- ORA2
- ORA1
- V1R9
- V1R8
- V1R6
- V1R11
- V1R7
- V1R5
- V1R4
- V1R3
- ORA4
- ORA3
- V1R2
- V1R1
- ORA5
- ORA6
- ancV1R

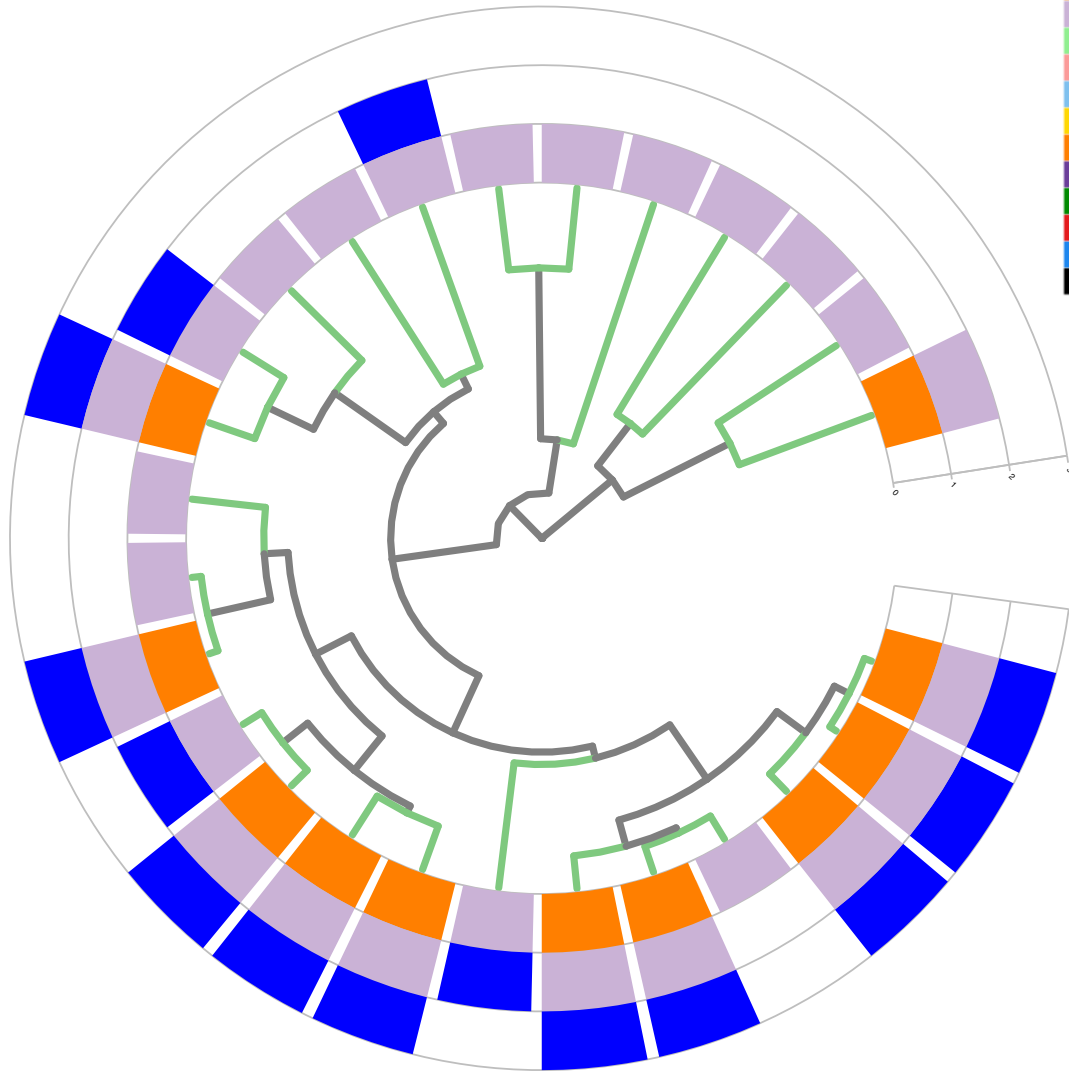

## i) Aves (with Crocodylia as outgroup)

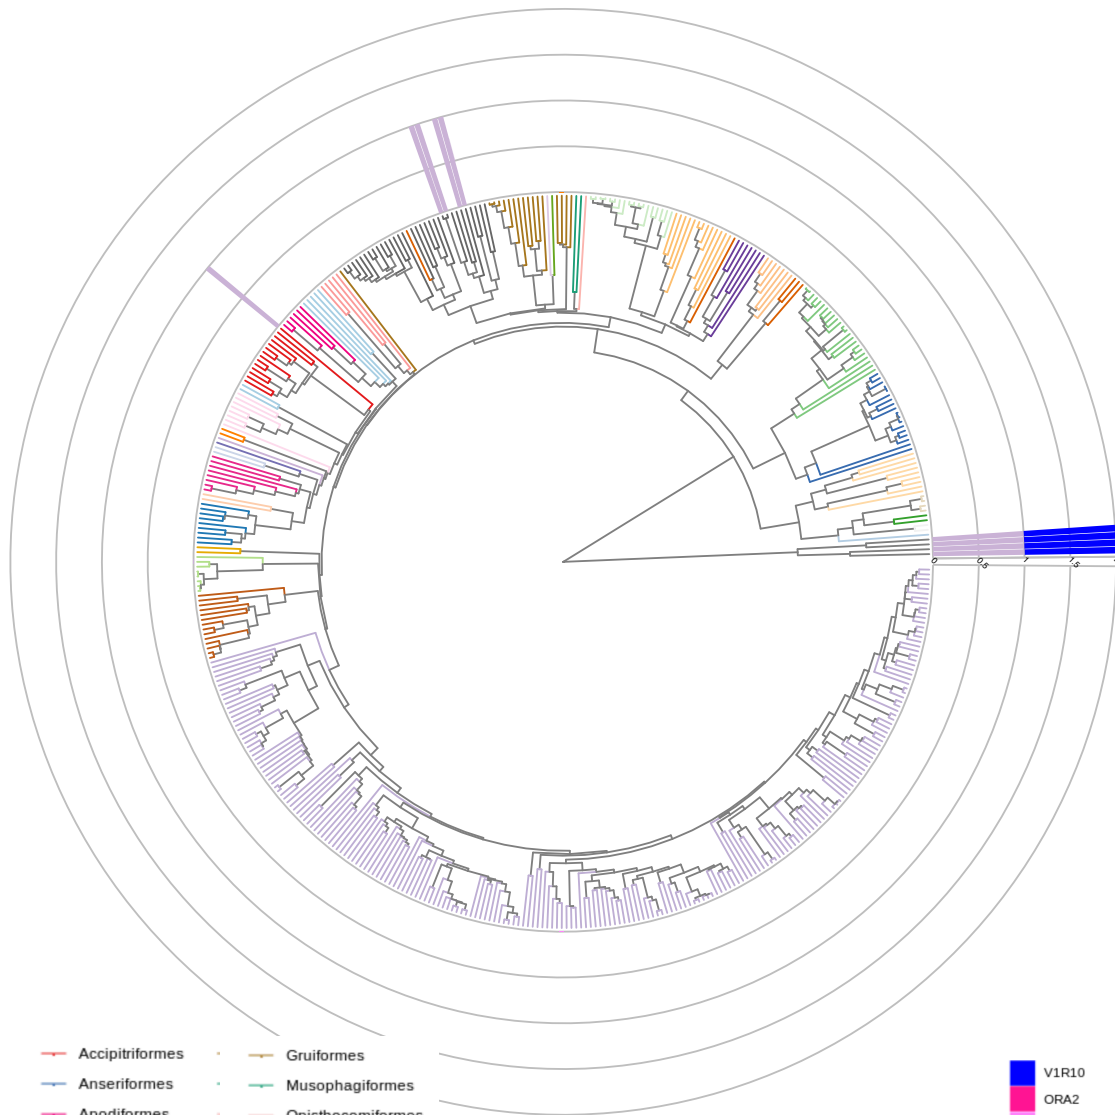

- |                  |                     |
|------------------|---------------------|
| Accipitriformes  | Gruiformes          |
| Anseriformes     | Musophagiformes     |
| Apodiformes      | Opisthocomiformes   |
| Apterygiformes   | Passeriformes       |
| Bucerotiformes   | Pelecaniformes      |
| Caprimulgiformes | Phoenicopteriformes |
| Cariamiformes    | Piciformes          |
| Casuariiformes   | Podicipediformes    |
| Charadriiformes  | Procellariiformes   |
| Ciconiiformes    | Psittaciformes      |
| Coliiformes      | Rheiformes          |
| Columbiformes    | Sphenisciformes     |
| Coraciiformes    | Strigiformes        |
| Cuculiformes     | Struthioniformes    |
| Falconiformes    | Tinamiformes        |
| Galbuliformes    | Trogoniformes       |
| Galliformes      | Upupiformes         |

- |        |
|--------|
| V1R10  |
| ORA2   |
| ORA1   |
| V1R9   |
| V1R8   |
| V1R6   |
| V1R11  |
| V1R7   |
| V1R5   |
| V1R4   |
| V1R3   |
| ORA4   |
| ORA3   |
| V1R2   |
| V1R1   |
| ORA5   |
| ORA6   |
| ancV1R |



**Supplementary Fig. 22 | Vertebrate *V1R* gene tree.** **a**, Near maximum likelihood phylogeny of *V1R* genes in vertebrates with branches colored according to the vertebrate (sub)class. **b**, Clade tree generated from (a) with local support values indicated at each node (according to a Shimodaira-Hasegawa test). We kept the clade name for *ancV1R*, which denotes “ancestral *V1R*” as proposed by Suzuki et al.<sup>23</sup>. In our gene tree, this clade is the sister clade to all other *V1R* genes, while in the latter study, *ancV1R* genes were clustered together with the *ORA5* and *ORA6* clades. While Suzuki et al. suggested that *ancV1R* originated before the MRCA of bony vertebrates, we found that *ancV1R* genes most likely originated before the MRCA of all vertebrates, followed by a loss in jawless and in cartilaginous fishes. All other *V1R* clades, which were only poorly characterized in previous studies, were renamed *V1R1* to *V1R11*, while we kept the former *ORA* clade nomenclature (*ORA1* to *ORA6*) for teleosts. The tree in newick version, as well as all sequences and the alignment file can be found in FigShare. Sub-trees of each vertebrate (sub)class with the number of *V1R* genes are shown in Supplementary Fig. 21. Maximum likelihood phylogeny of *V1R* genes extracted from one species per vertebrate (sub)class is shown in Supplementary Figs. 23-24.

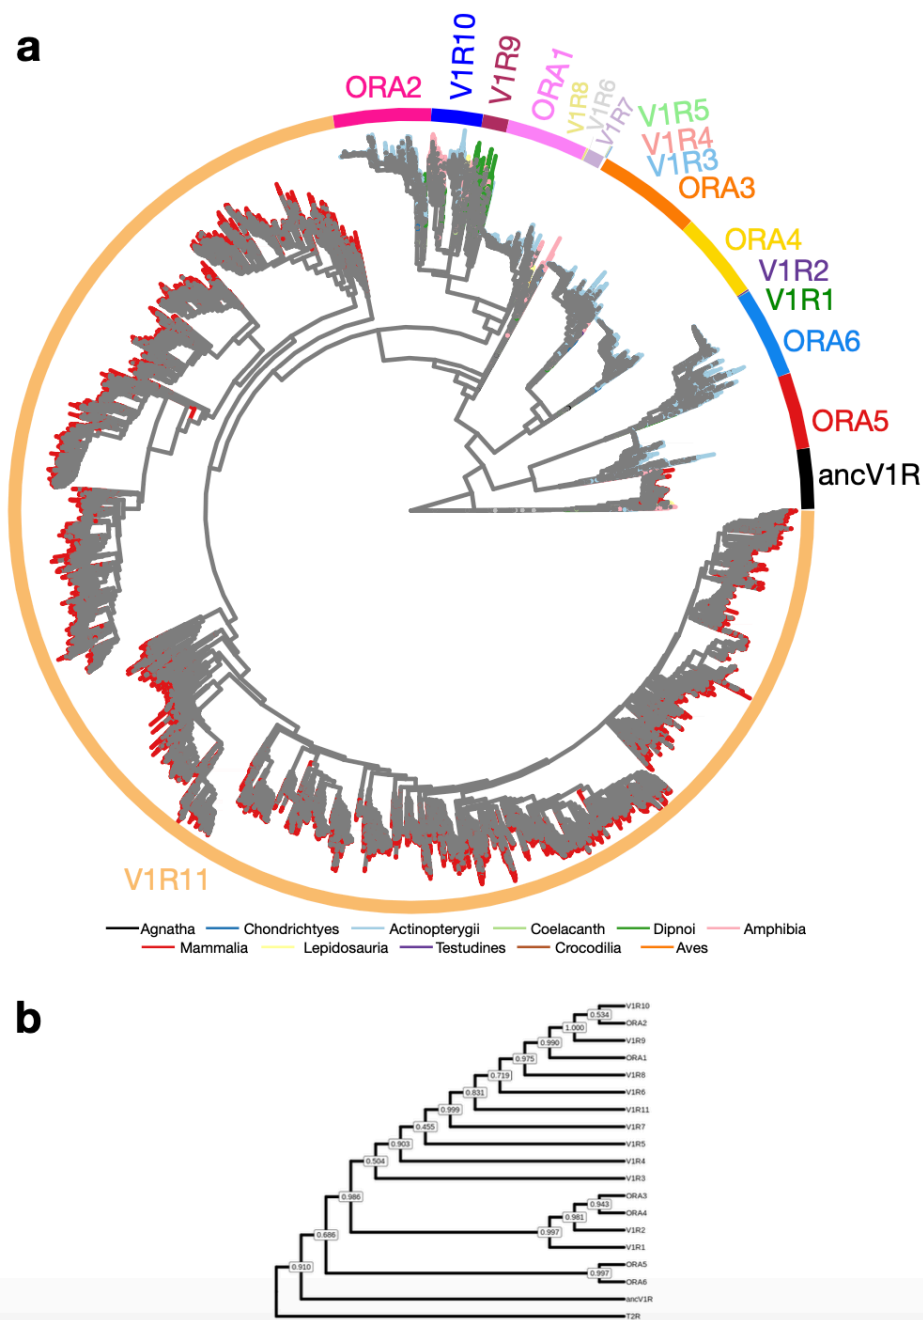

**Supplementary Fig. 23 | Maximum likelihood phylogeny of *VIR* genes.** Maximum likelihood phylogeny of *VIR* genes extracted from one representative species per vertebrate subclass. Branches are colored according to the vertebrate (sub)class. *VIR* subclades are indicated. R8 clade is directly indicated inside the phylogenetic tree as there was only one sequence in this clade. The tree was computed using the optimal model found by ModelFinder (JTT+F+R8). The robustness of the nodes was evaluated with 1,000 ultrafast bootstraps and these bootstrap values are reported for each node in Supplementary Fig. 24. While the overall topology was similar to the *VIR* near-ML tree, the *ORA2* clade found by the near-ML method was retrieved as paraphyletic, and divided in three distinct clades in the ML tree. We also retrieved a sister relationship between the *ancVIR* clade and the *ORA5/ORA6* clade, similar to Suzuki et al.<sup>23</sup>, while *ancVIR* was the sister clade to all other *VIR* genes in our near-ML topology.

## V1R

Best model : JTT+F+R8

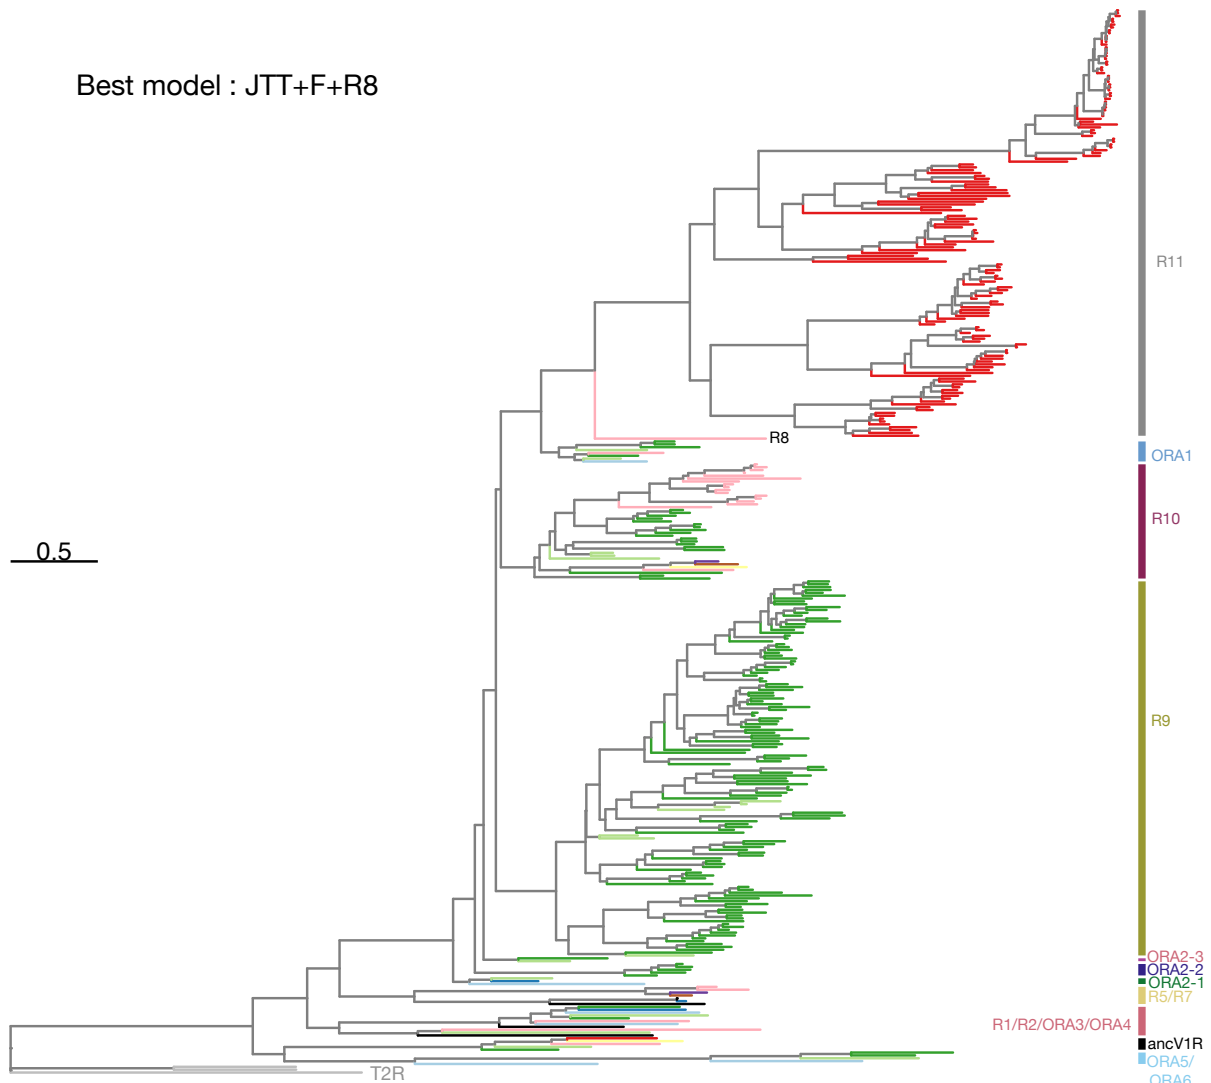

- |                                |                              |                              |
|--------------------------------|------------------------------|------------------------------|
| — <i>Petromyzon marinus</i>    | — <i>Callorhynchus milii</i> | — <i>Danio rerio</i>         |
| — <i>Protopterus annectens</i> | — <i>Xenopus tropicalis</i>  | — <i>Lacerta viridis</i>     |
| — <i>Chelonia mydas</i>        | — <i>Gallus gallus</i>       | — <i>Alligator sinensis</i>  |
|                                |                              | — <i>Latimeria chalumnae</i> |

**Supplementary Fig. 24 | Maximum likelihood phylogeny of *VIR* genes.** Same maximum likelihood phylogeny of *VIR* genes as in Supplementary Fig. 23 but with bootstrap values indicated at each node.

## V1R

Best model : JTT+F+R8

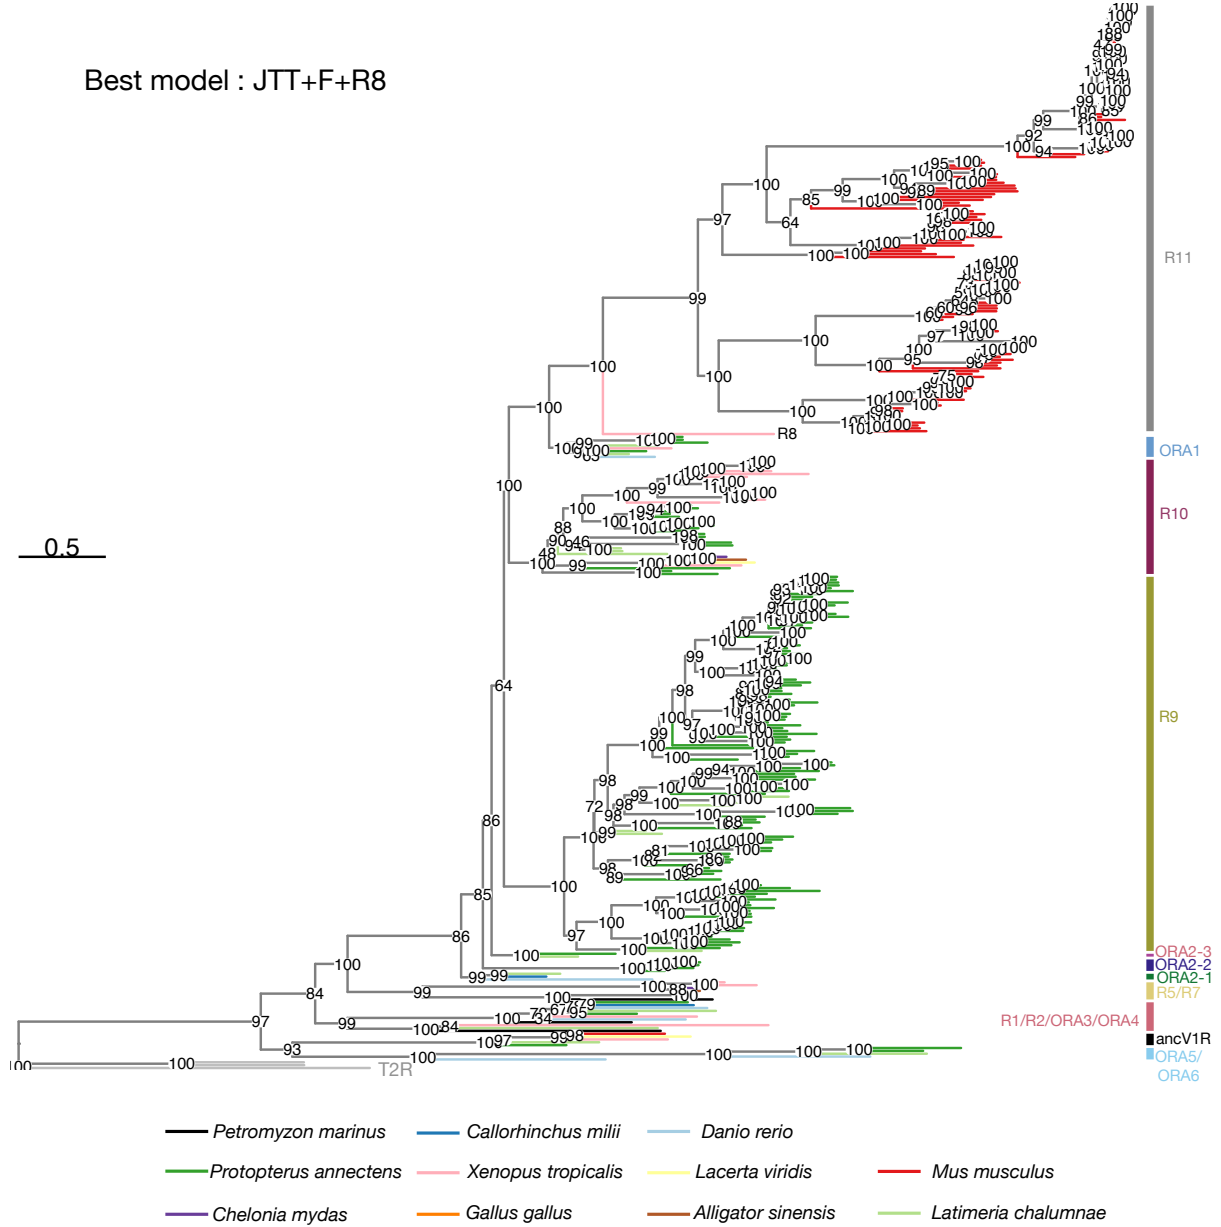

**Supplementary Fig. 25 | Evolutionary history of *V1R* and *V2R* genes in vertebrates.** **a**, Schematic of the *V1R* gene tree (top) indicating the subclades within the *V1R* gene family in vertebrates. Gene duplication events leading to subclade divergence are indicated as triangles on the respective branches in the schematic vertebrate phylogeny (left), subclade losses are indicated with the cross symbol below the respective branches. The numbers refer to nodes in the gene tree. Circles on the right indicate the presence of a particular subclade in a given evolutionary lineage, whereby the size of each circle corresponds to the mean number of complete *V1R* genes per species in the respective subclade and lineage. The *V1R* gene tree is shown in Supplementary Fig. 22. **b**, Schematic of the *V2R* gene tree (top) indicating the subclades within the *V2R* gene family in vertebrates. Gene duplication events are indicated as triangles on the respective branches in the schematic vertebrate phylogeny (left), subclade losses are indicated with the cross symbol. The numbers refer to nodes in the gene tree. Circles on the right indicate the presence of a particular subclade in a given evolutionary lineage, whereby the size of each circle corresponds to the mean number of complete *V2R* genes per species in the respective subclade and lineage. The *V2R* gene tree is shown in Supplementary Fig. 28. Subclades present in non-teleost fishes but absent in teleosts are marked with an “\*” (*ancV1R*, *V1R3*, *V1R8*, *V1R9*, *V2RC3* and *V2RD1*). Subclades present in osteoglossomorph and elopomorph but absent in clupeocephalans (*V1R10*) are marked with a “#”. Source data are provided as a Source Data file.

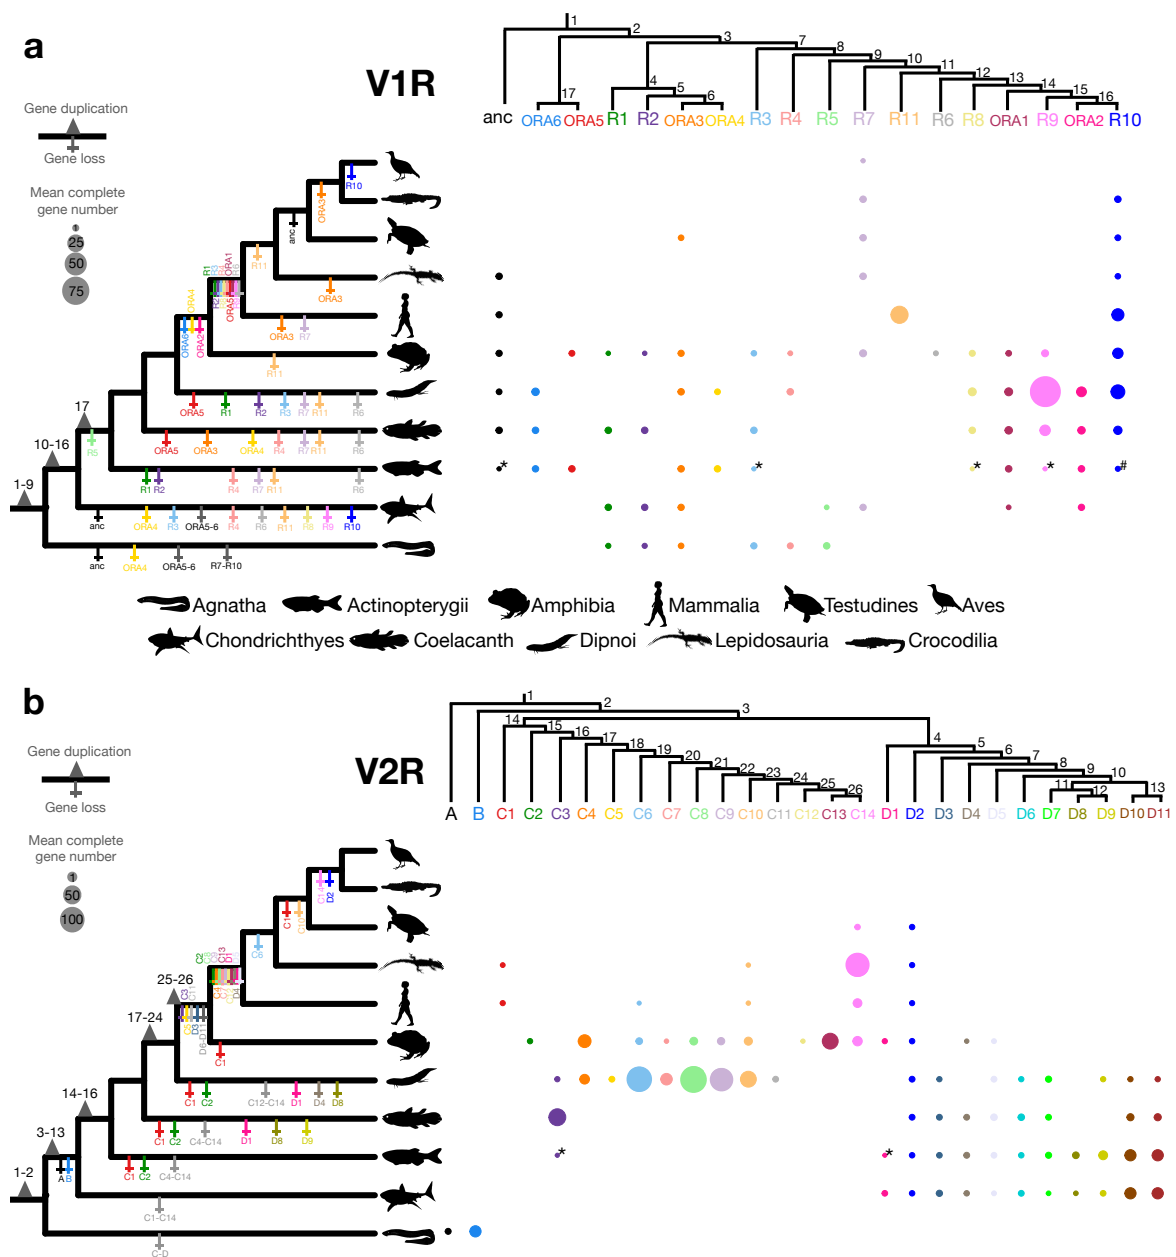

**Supplementary Fig. 26 | Neutral evolution of bird *VIR* genes.** PAML was used to compute the dN/dS ( $= \omega$ ) per branch under four different models. **a**, Model 1: Free-ratio model which assume one  $\omega$  ratio per branch **b**, Model 2: Two-ratio model which assume one  $\omega$  ratio for birds and one  $\omega$  ratio for all other branches **c**, Model 3 : Two-ratio model with one  $\omega$  ratio for birds and crocodiles and one  $\omega$  for all other branches **d**, Model 4 : Two-ratio model with one  $\omega$  ratio for birds, crocodiles and turtles and one  $\omega$  for all other branches. For the free-ratio model, the mean  $\omega$  ratio per clade is indicated. While the mean  $\omega$  ratio was low for turtles (0.16), crocodiles (0.35), lepidosaurs (0.18) and amphibian (0.26), indicative of negative selection on *VIR7* in these clades, the mean  $\omega$  ratio of birds (1.05) suggest a relaxation of selection. **e**, Log likelihood (LnL) and number of parameters (np) of each model. The log-likelihood, as well as the  $\omega$  value found under a null model (one-ratio for all the branches) is also indicated. **f**, Log likelihood ratio test between model 2 and the null model and between model 1 and model 2. The free-ratio model was the most likely model and significantly better than the two-ratio models. The best two-ratio model tested, and which is significantly better than the null model, is the two-ratio model where birds evolve under a more elevated  $\omega$  ratio ( $\omega=0.47$ ) compared to all other branches ( $\omega=0.15$ ). **g**, Phylogenetic tree used in RELAX. Bird branches, colored in orange, were assigned as test branches while all other branches (blue) were assigned as reference. **h**, Results of the RELAX analysis. Significant relaxation of selection ( $K < 1$ ,  $P$ -value  $< 0.05$ ) was detected in the bird clade. Source data are provided as a Source Data file.

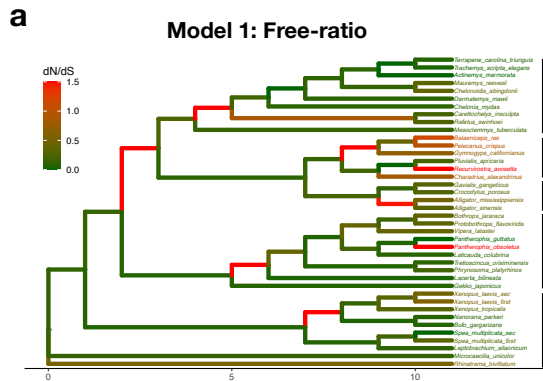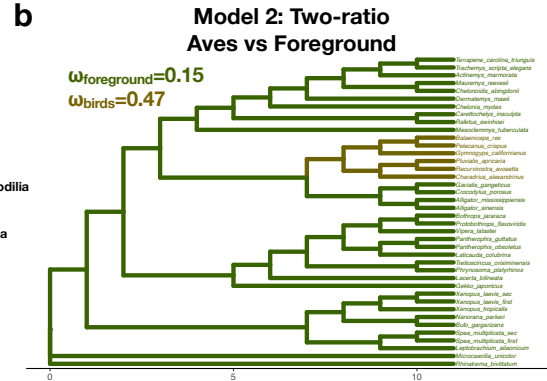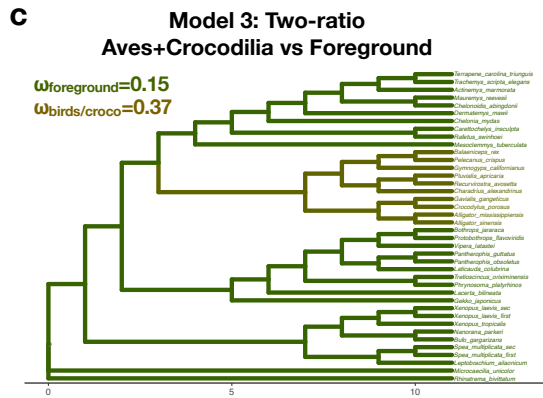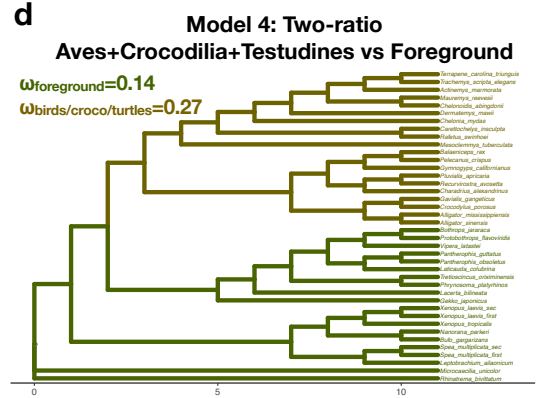

**e**

| Model                         | np  | Lnl          |
|-------------------------------|-----|--------------|
| Model 1                       | 155 | -15723.48011 |
| Model 2                       | 80  | -15860.67583 |
| Model 3                       | 80  | -15862.20789 |
| Model 4                       | 80  | -15872.18150 |
| Null model ( $\omega=0.176$ ) | 79  | -15899.00447 |

**f**

| Models compared       | LRT    | df | p-value |
|-----------------------|--------|----|---------|
| Model 2 vs Null model | 76.66  | 1  | 2E-18   |
| Model 1 vs Model 2    | 274.39 | 75 | 1.6E-24 |

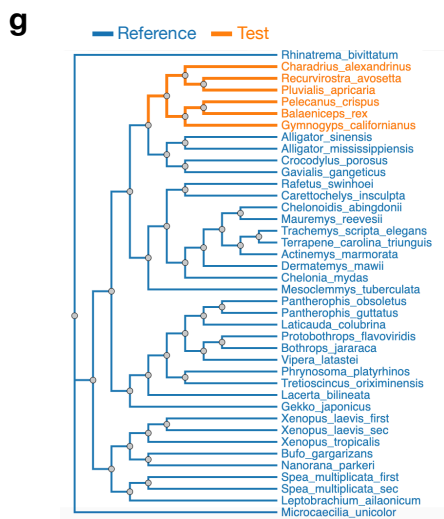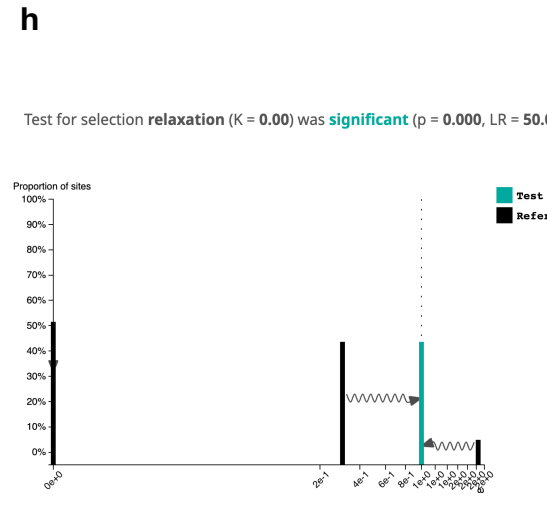

**Supplementary Fig. 27 | Phylogenies showing the number of complete *V2R* genes.** Vertebrate phylogeny and (sub)class phylogenies displaying the number of complete *V2R* genes (BUSCO80 dataset). **a**, Vertebrata; **b**, Agnatha; **c**, Chondrichthyes; **d**, Actinopterygii; **e**, Amphibia; **f**, Mammalia; **g**, Lepidosauria; **h**, Testudines; **i**, Aves and Crocodylia. Terminal branches and species names are colored according to (sub)class (**a**) or according to order based on the NCBI taxonomy database (**b-i**). *V2R*-subclades are indicated. Source data are provided as a Source Data file.

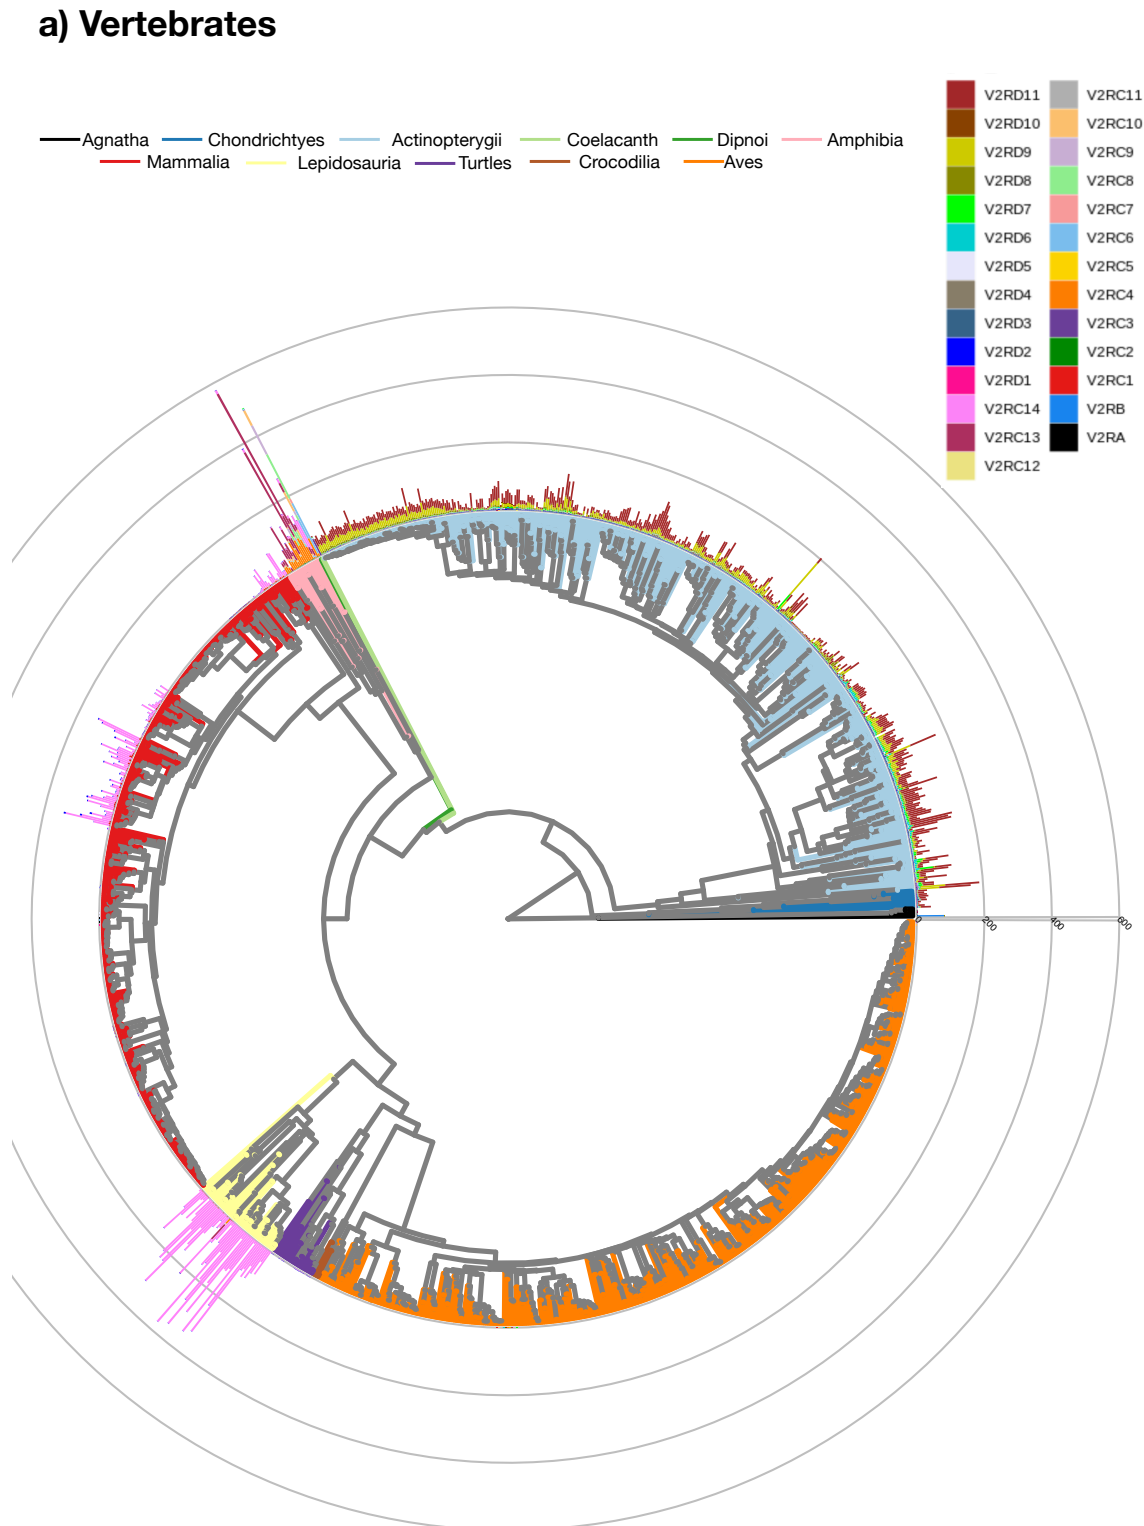

**b) Agnatha**

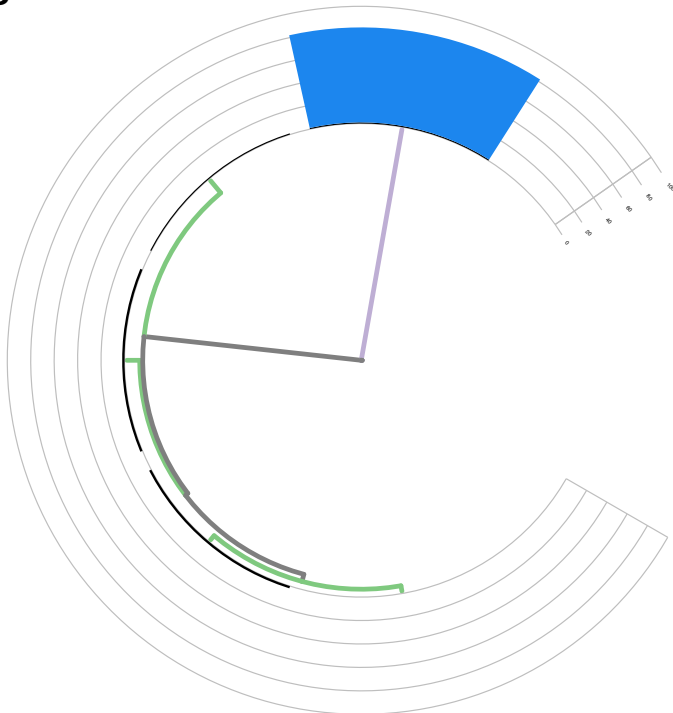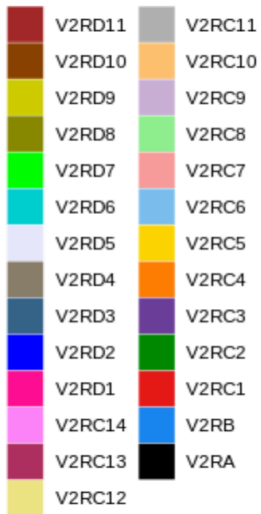

**c) Chondrichthyes**

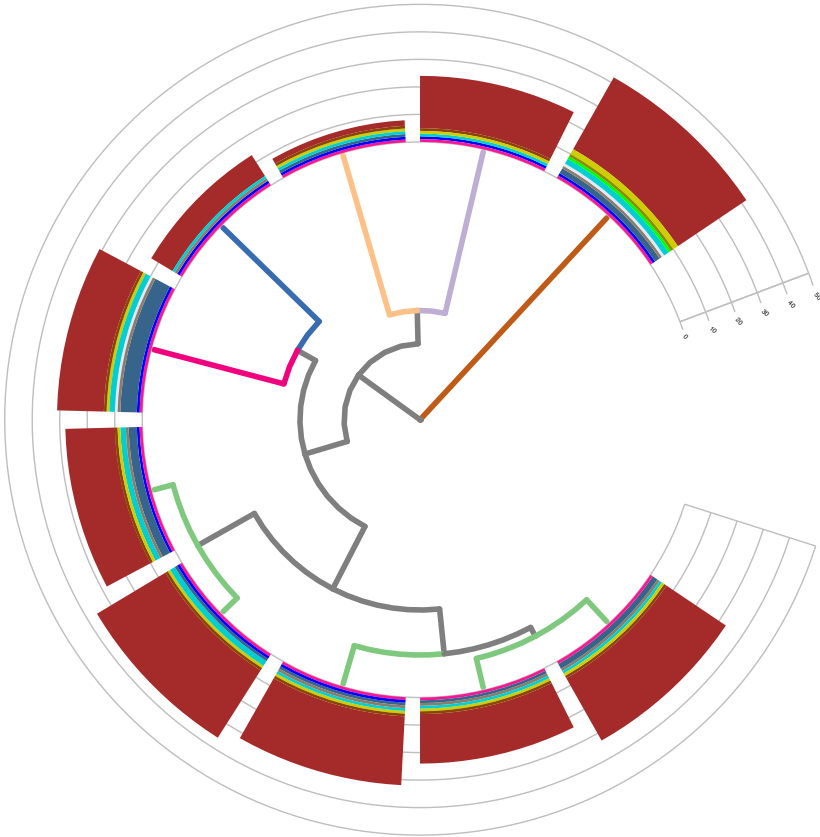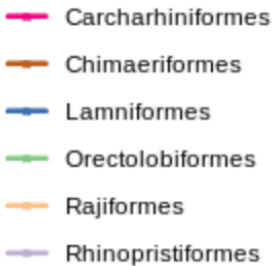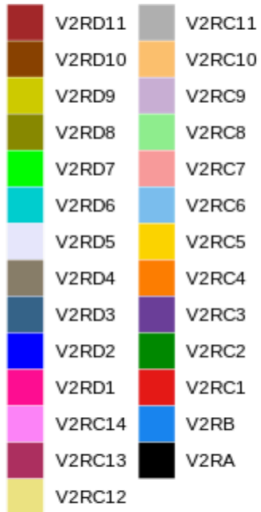



## d) Actinopterygii

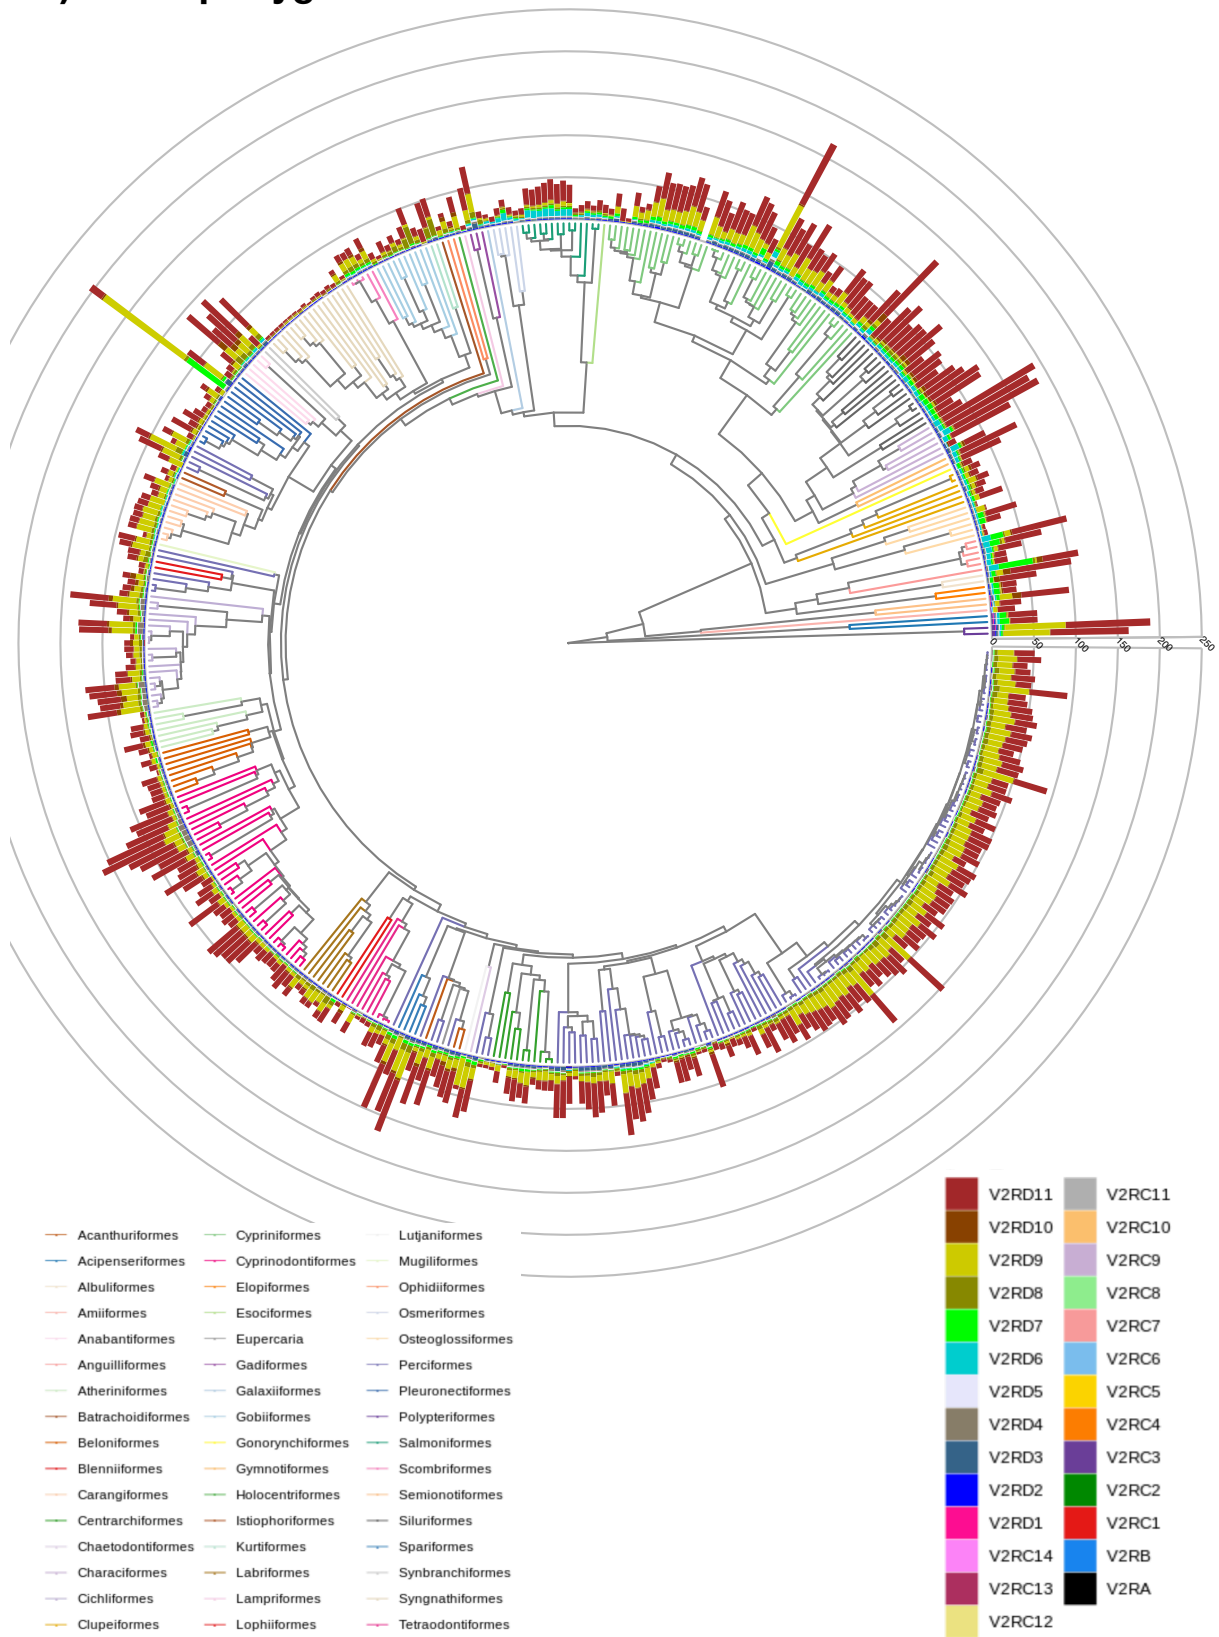

# e) Amphibia

— Anura  
— Caudata  
— Gymnophiona

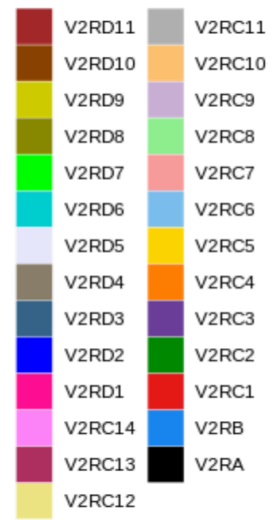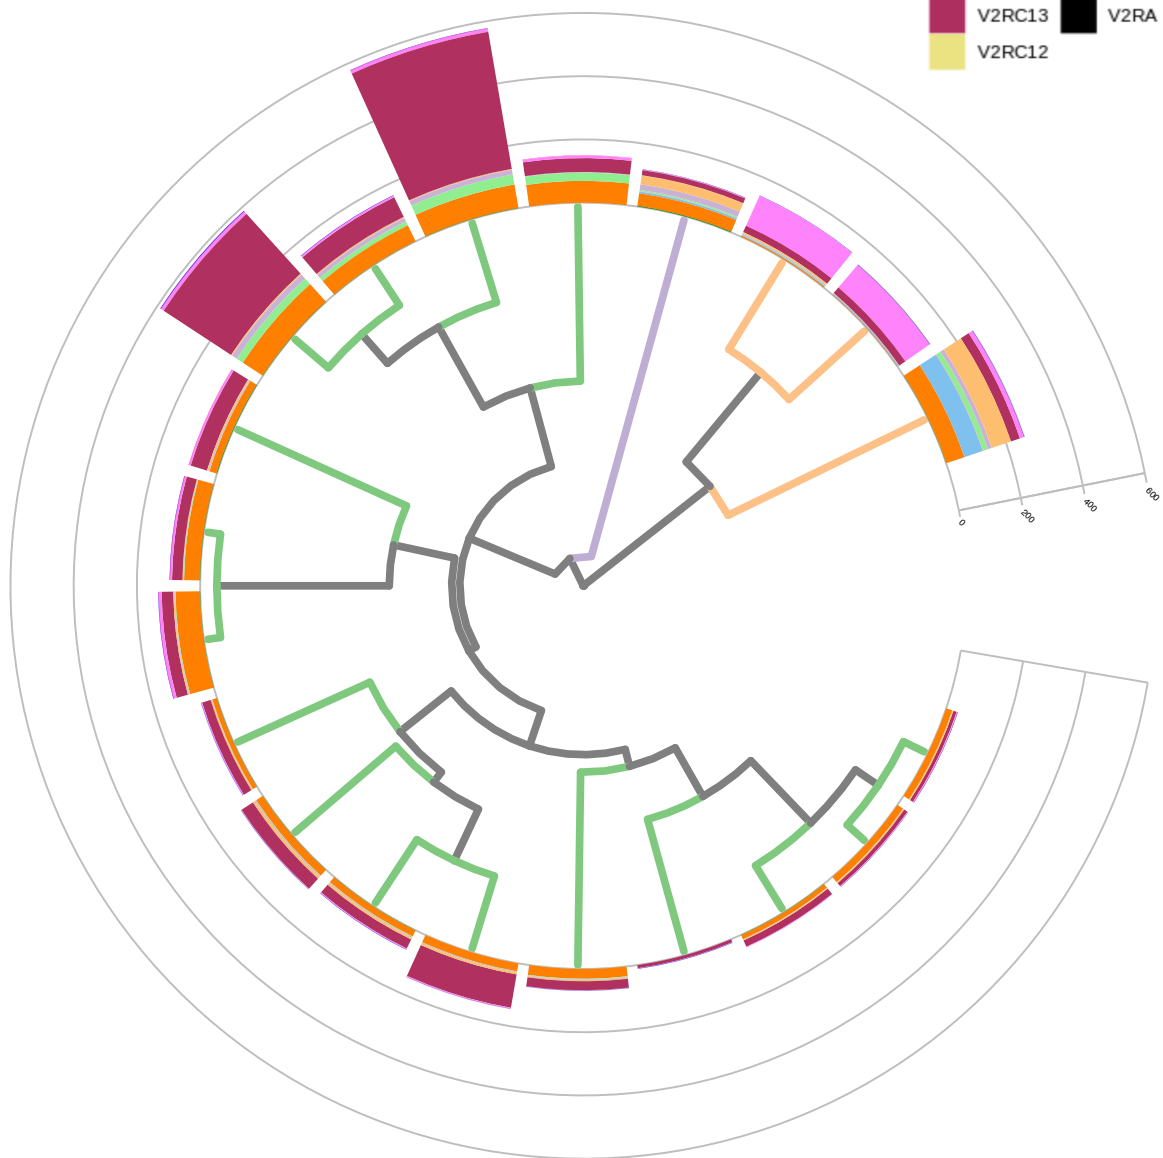

## f) Mammalia

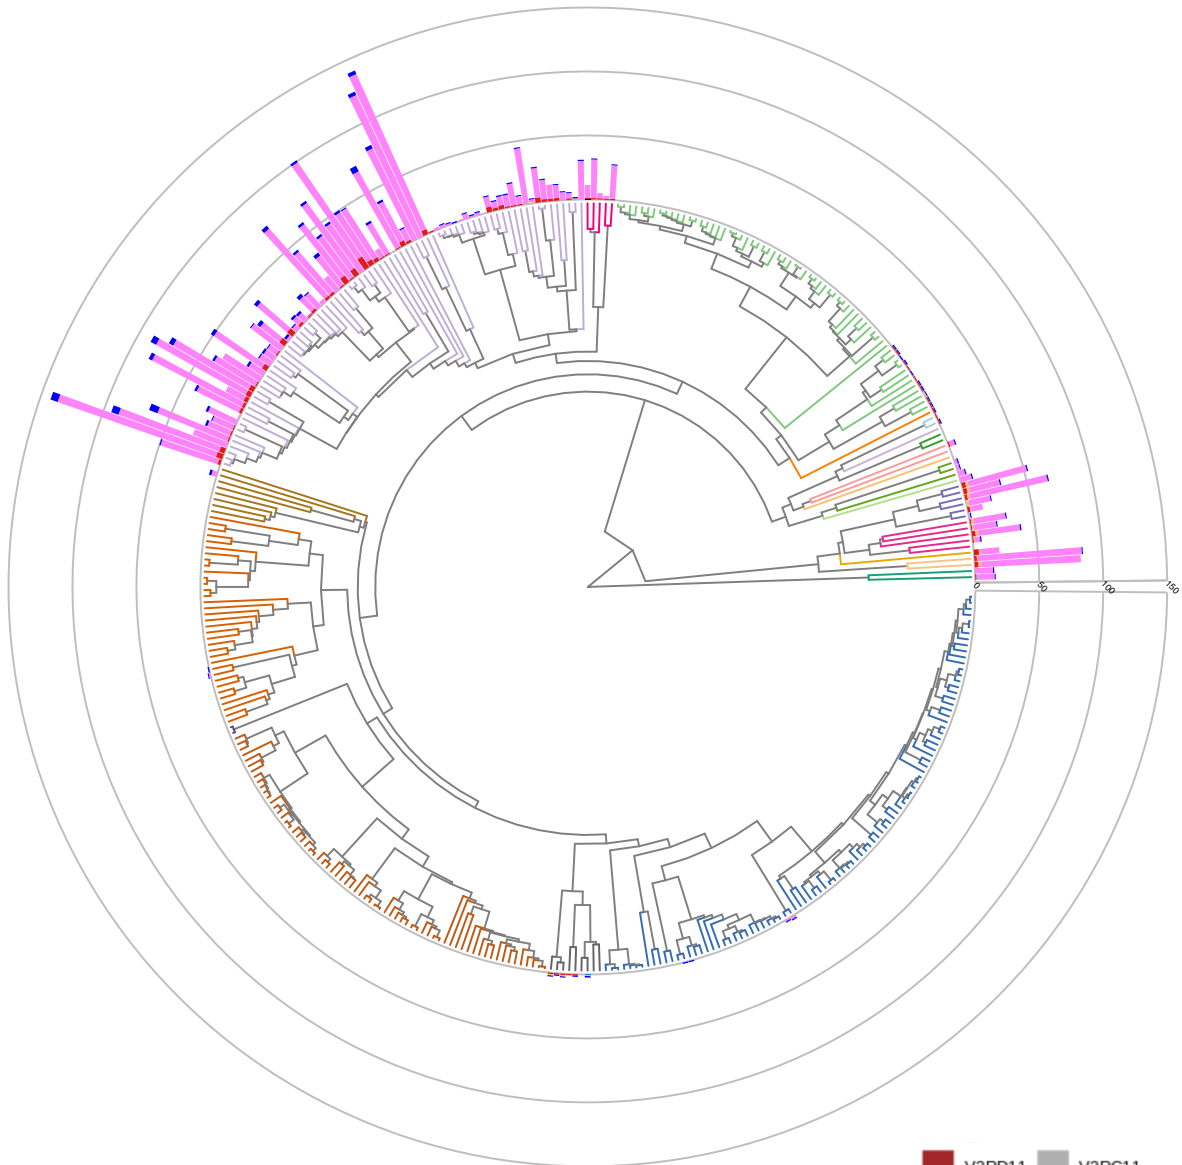

- |                   |                  |
|-------------------|------------------|
| — Afrosoricida    | — Lagomorpha     |
| — Artiodactyla    | — Macroscelidea  |
| — Carnivora       | — Microbiotheria |
| — Chiroptera      | — Monotremata    |
| — Cingulata       | — Perissodactyla |
| — Dasyuromorphia  | — Pholidota      |
| — Dermoptera      | — Pilosa         |
| — Didelphimorphia | — Primates       |
| — Diprotodontia   | — Proboscidea    |
| — Eulipotyphla    | — Rodentia       |
| — Hyracoidea      | — Sirenia        |

- |          |          |
|----------|----------|
| — V2RD11 | — V2RC11 |
| — V2RD10 | — V2RC10 |
| — V2RD9  | — V2RC9  |
| — V2RD8  | — V2RC8  |
| — V2RD7  | — V2RC7  |
| — V2RD6  | — V2RC6  |
| — V2RD5  | — V2RC5  |
| — V2RD4  | — V2RC4  |
| — V2RD3  | — V2RC3  |
| — V2RD2  | — V2RC2  |
| — V2RD1  | — V2RC1  |
| — V2RD14 | — V2RB   |
| — V2RD13 | — V2RA   |
| — V2RD12 |          |

# g) Lepidosauria

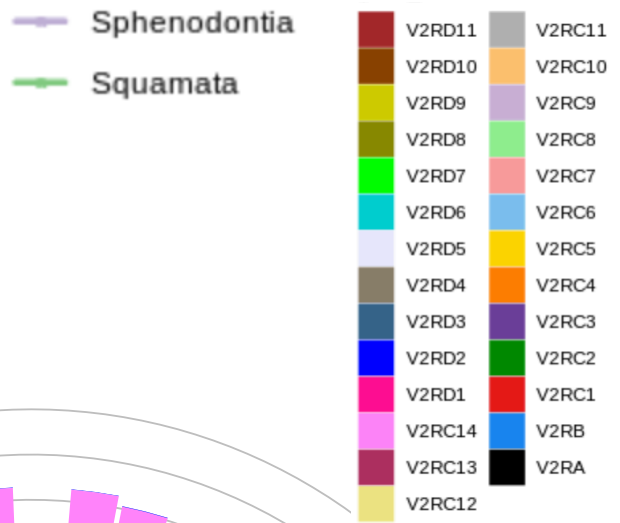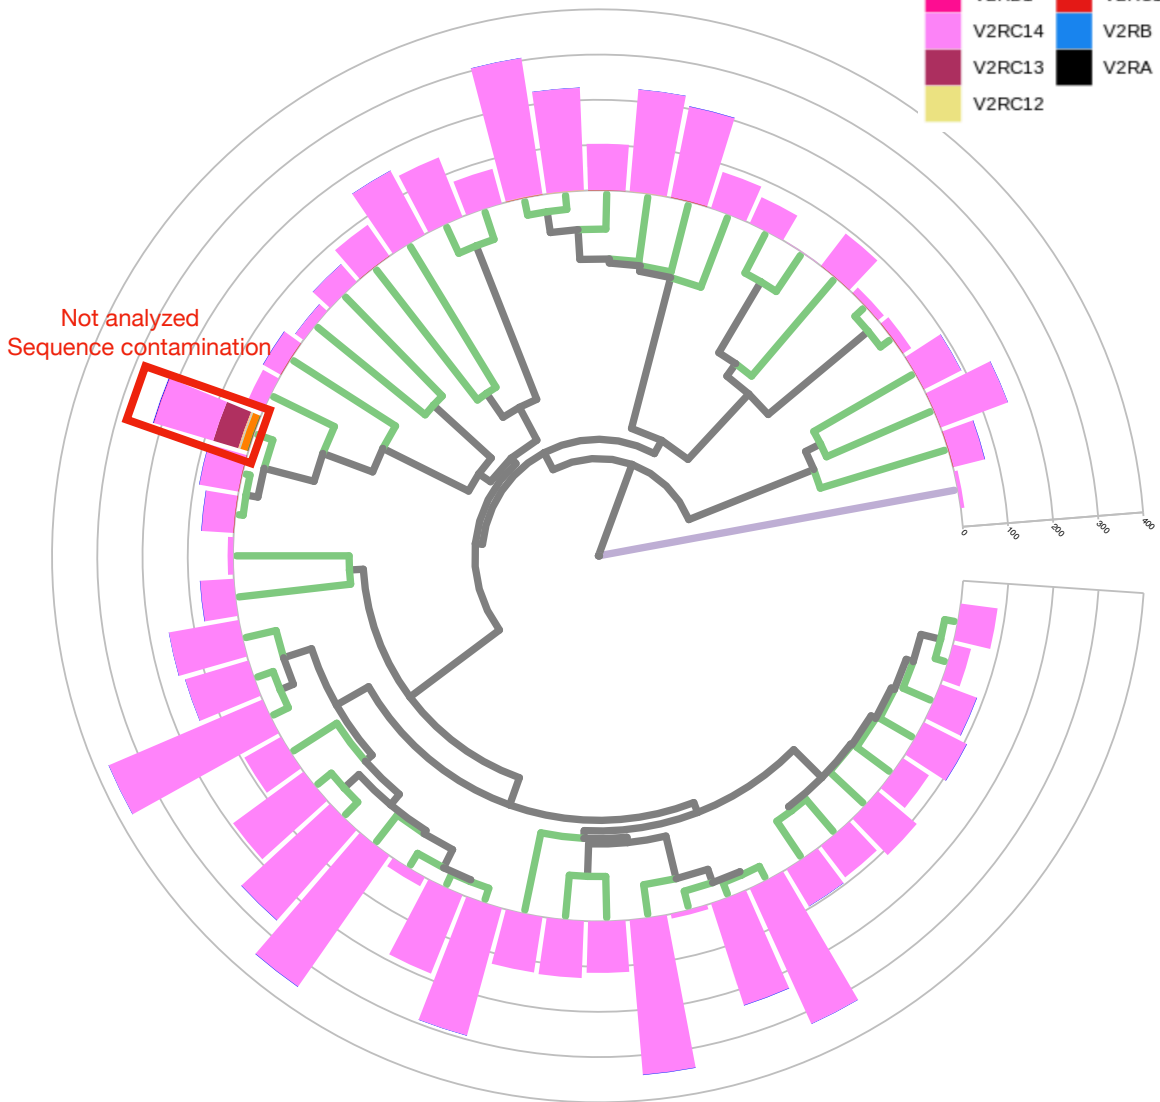

# h) Turtles

— Testudines

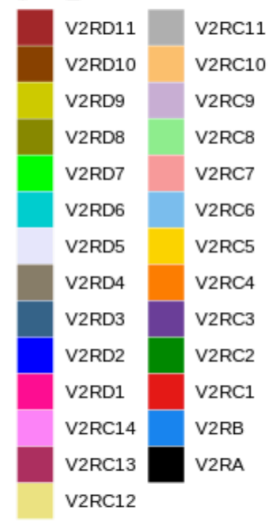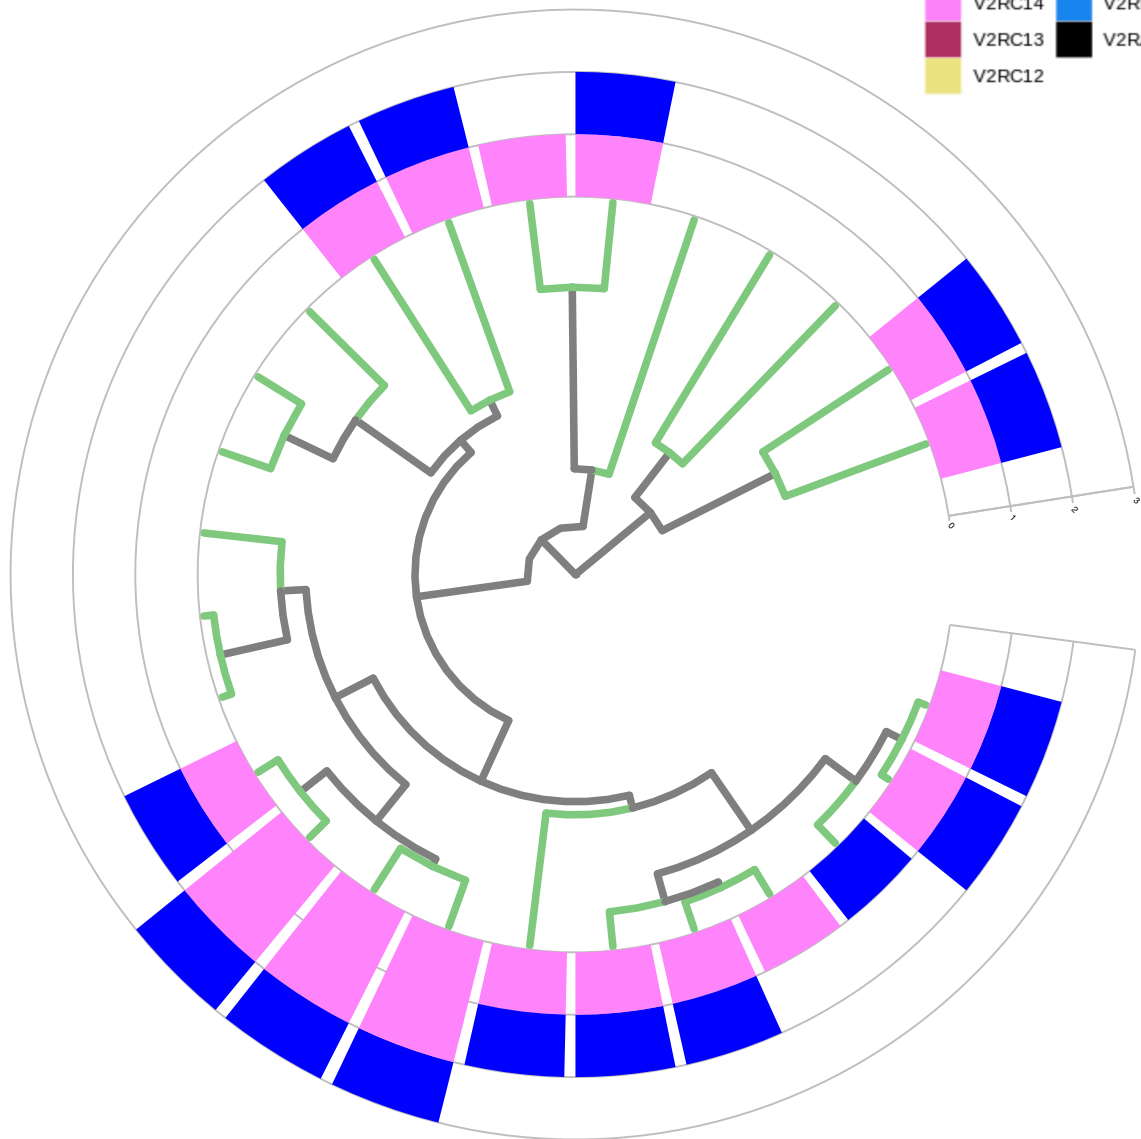

**i) Aves (with Crocodylia as outgroup)**

**No V2R genes in birds and crocodiles**

**Supplementary Fig. 28 | Vertebrate V2R gene tree.** **a**, Near maximum likelihood phylogeny of V2R genes of vertebrates with branches colored according to the vertebrate (sub)class. **b**, Clade tree generated from (a) with local support values indicated at each node (according to a Shimodaira-Hasegawa test). The V2R gene tree was consistent with previous studies, in particular the one by Zhang et al.<sup>26</sup>. As our extensive species sample allowed us to define new clades that were only partially or not at all described in previous studies, we also renamed all these clades. Thus, the formerly described *t*-V2R (tetrapods-V2R) clade was split into fourteen clades named V2RC1 to V2RC14, while the former *f*-V2R (fish-V2R; that is, *OlfC*) clade was split into eleven clades, named V2RD1 to V2RD11. The tree in newick version, as well as all sequences and the alignment file can be found in FigShare. Sub-trees of each vertebrate (sub)class with the number of V2R genes are shown in Supplementary Fig. 27. Maximum likelihood phylogeny of V2R genes extracted from one species per vertebrate (sub)class is shown in Supplementary Fig. 29-30.

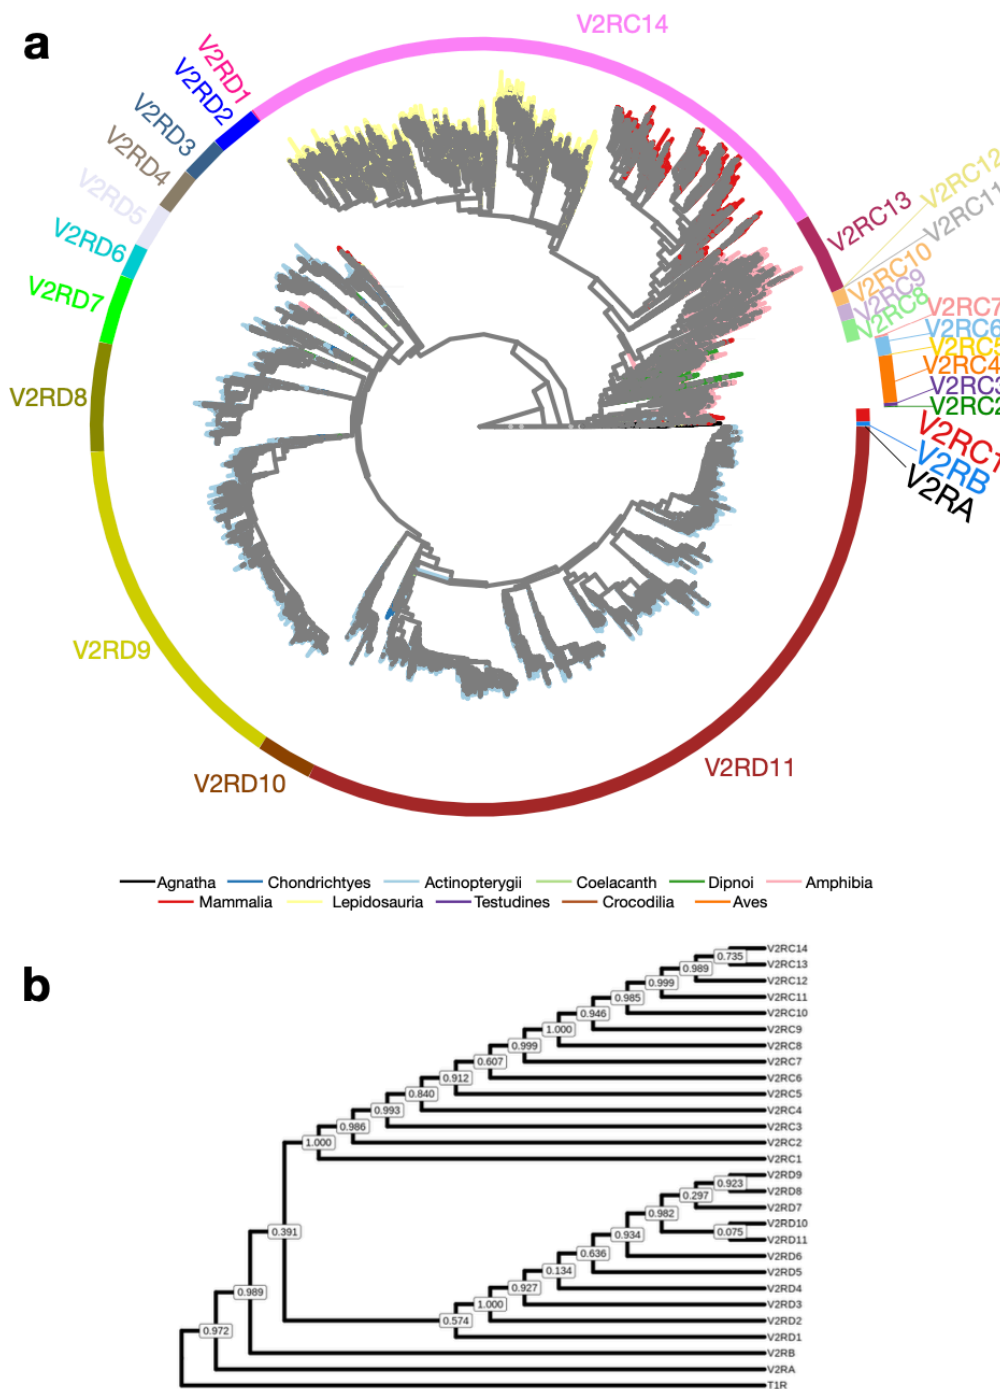

**Supplementary Fig. 29 | Maximum likelihood phylogeny of *V2R* genes.** Maximum likelihood phylogeny of *V2R* genes extracted from one representative species per vertebrate subclass. Branches are colored according to the vertebrate (sub)class. *V2R* subclades are indicated. *V2RA* is directly indicated inside the phylogenetic tree as there was only one sequence in this clade. The tree was computed using the optimal model found by ModelFinder (JTT+F+R10). The robustness of the nodes was evaluated with 1,000 ultrafast bootstraps and these bootstrap values are reported for each node in Supplementary Fig. 30. *V2RA*, *V2RB* and *V2RC* subclades retrieved in the near-ML topology as well as their relations were retrieved in this ML topology. At the contrary, the *V2RD2* clade, which was in the *V2RD* clade in the near-ML topology, is now the sister clade of all *V2RC* and other *V2RD* genes. When looking at clades that diverged more recently, we also retrieved some differences compared to the near-ML topology, especially for *VRRC8* which is paraphyletic in the ML topology and divided in four different clades.

## V2R

Best model : JTT+F+R10

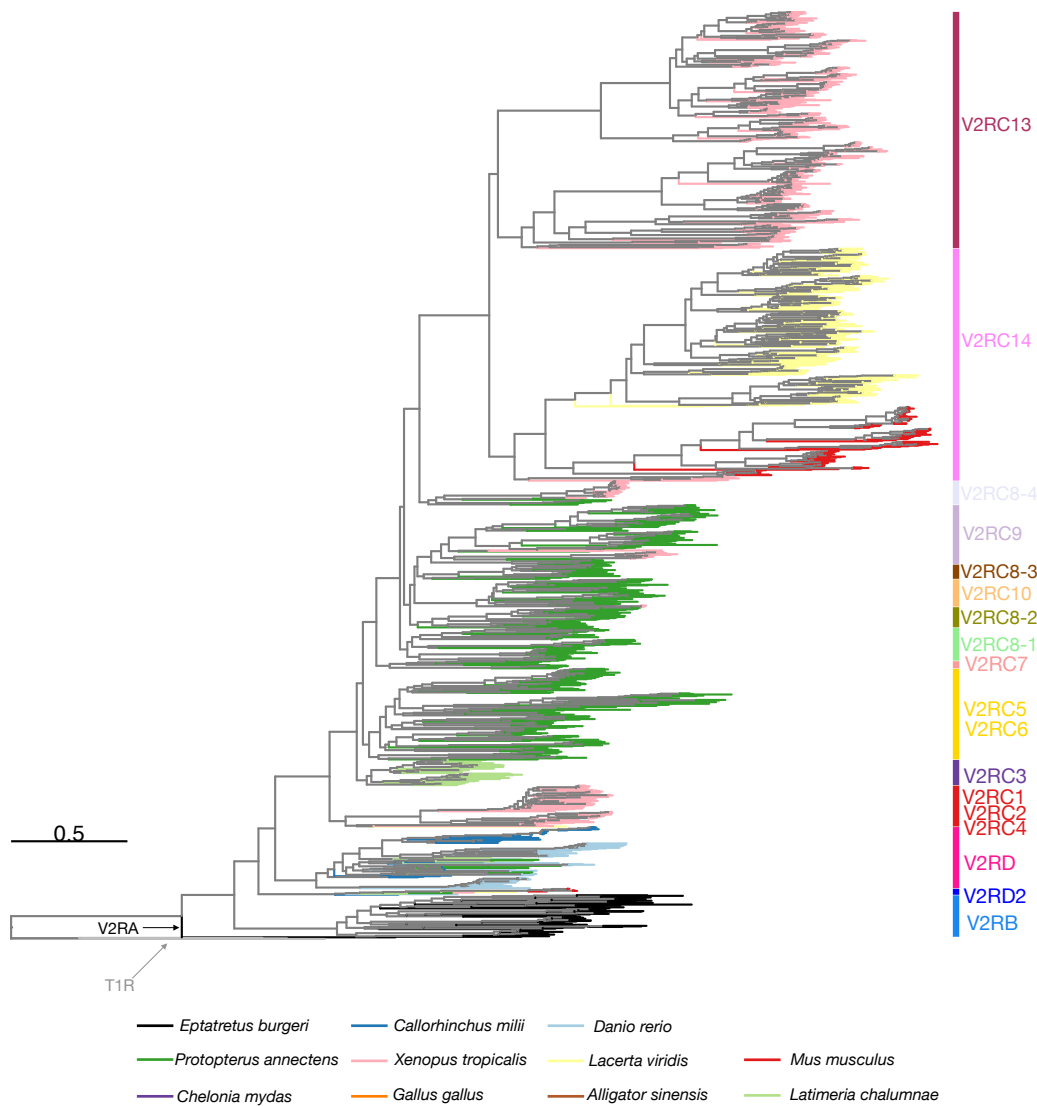



**Supplementary Fig. 30 | Maximum likelihood phylogeny of V2R genes.** Same maximum likelihood phylogeny of V2R genes as in Supplementary Fig. 29 but with bootstrap values indicated at each node.

## V2R

Best model : JTT+F+R10

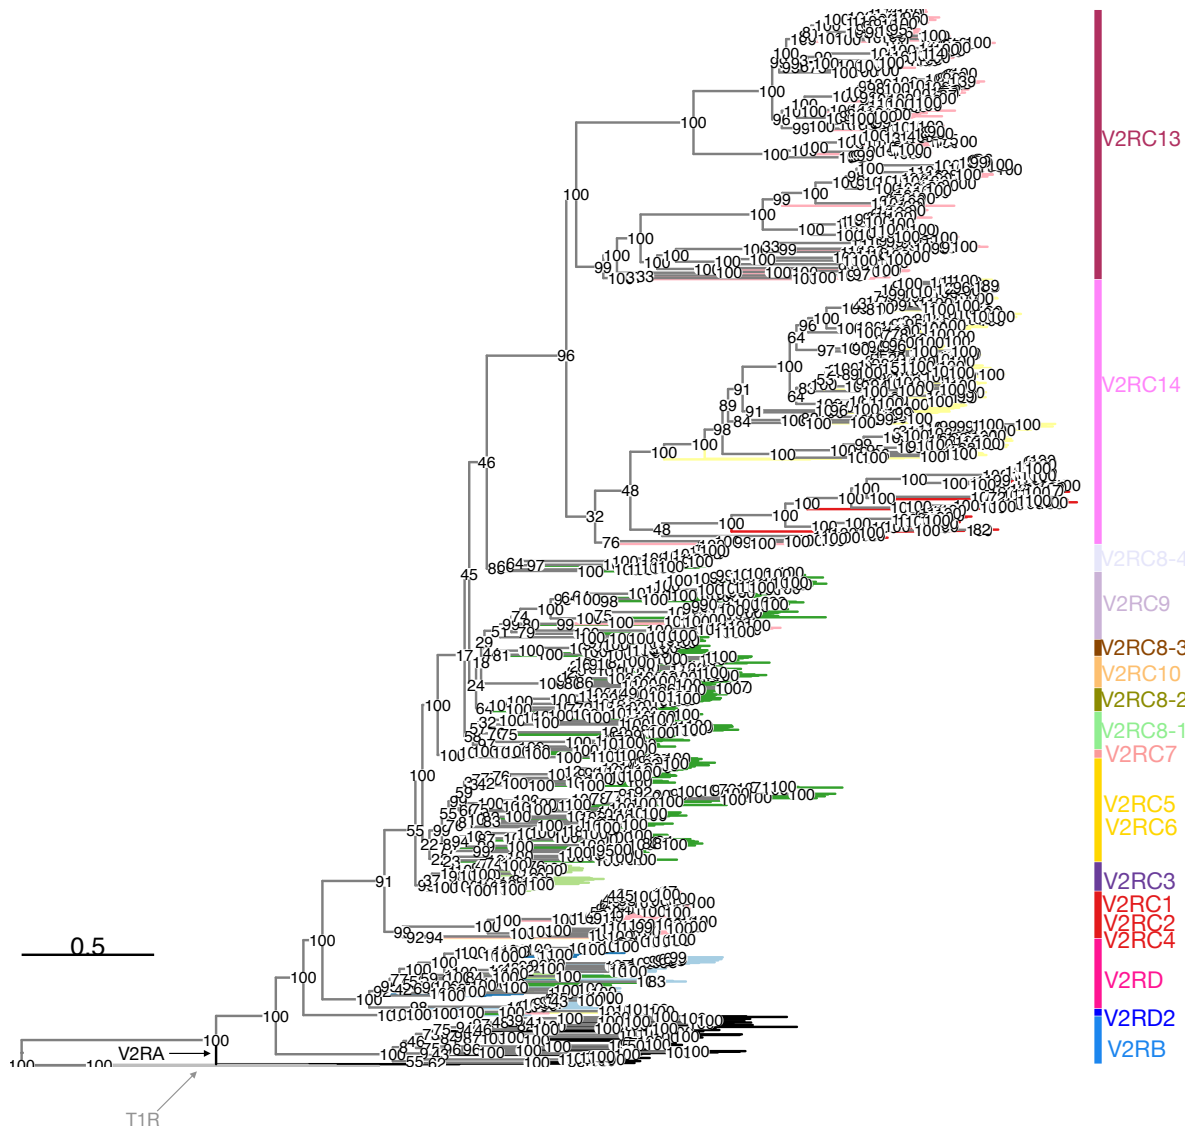

- |                                |                              |                              |
|--------------------------------|------------------------------|------------------------------|
| — <i>Eptatretus burgeri</i>    | — <i>Callorhynchus milii</i> | — <i>Danio rerio</i>         |
| — <i>Protopterus annectens</i> | — <i>Xenopus tropicalis</i>  | — <i>Lacerta viridis</i>     |
| — <i>Chelonia mydas</i>        | — <i>Gallus gallus</i>       | — <i>Alligator sinensis</i>  |
|                                |                              | — <i>Mus musculus</i>        |
|                                |                              | — <i>Latimeria chalumnae</i> |

**Supplementary Fig. 31 | Co-evolution of the *VIR* gene repertoire and the accessory olfactory bulb (AOB).** **a**, Phylogeny of bat species included in our dataset, for which the information on the AOB was available from the literature (absence: light blue; presence: red). The number above each branch corresponds to the difference between the number of *VIR* genes gained and the number of *VIR* genes lost (inferred from a gene tree - species tree reconciliation method). Assuming that a loss of the AOB is not reversible, the phylogeny suggests at least four independent losses, indicated by light blue stars. **b**, Box-plots (first quartile - 1.5; the interquartile range, the first quartile, the mean, the third quartile and the third quartile + 1.5 interquartile range. Dots represent outliers.) showing the number of complete *VIR* genes in bats with (red) and without (blue) an AOB (Two-sided pGLS test.  $P_{\text{PGLS}}; n = 15, P = 1.775e-05$ ). **c**, Different model tested with PAML. The Free ratio model (M3) assumes a different  $\omega$  per branch. The one ratio model (M1) assumes the same  $\omega$  ratio for every branch. In the two-ratio model, one  $\omega$  ratio was assigned to terminal branches corresponding to *VIR* genes of bats lacking an AOB (indicated by blue arrows in **e**), and one  $\omega$  ratio was assigned to all other branches. “LnI” corresponds to the likelihood score of each model, and “np” corresponds to the number of parameters. **d**, Comparison between the three models. LRT corresponding the likelihood ratio test statistic, and the p-value was computed using the number of degrees of freedom (difference in the number of parameters between the two models tested). The free-ratio model was significantly better than the two-ratio model and the one ratio model, and the two-ratio model was not significantly better than the one ratio model. **e**, *VIR* gene tree of bats. Branches are colored according to their dN/dS value computed under the free ratio model. The  $\omega$  ratio computed under the one ratio model is indicated on the top left ( $\omega = 0.7$ ), as well as the  $\omega$  ratio for *VIR* genes of bats lacking an AOB ( $\omega = 0.77$ ) and the  $\omega$  ratio of all other branches ( $\omega = 0.69$ ) under the two-ratio model. Blue arrows indicate terminal branches corresponding to *VIR* genes of bats lacking an AOB. **f**, Distribution of  $\omega$  ratio in terminal branches, under the free ratio model, corresponding to bats with (red) and without (blue) an AOB. **g**, Results of RELAX showing the shift of the  $\omega$  distribution toward 1 in *VIR* genes of bats lacking an AOB relative to *VIR* genes of bats with an intact AOB. A significant relaxation of selection was detected with RELAX ( $K = 0.12, p = 0$ ). Source data are provided as a Source Data file.

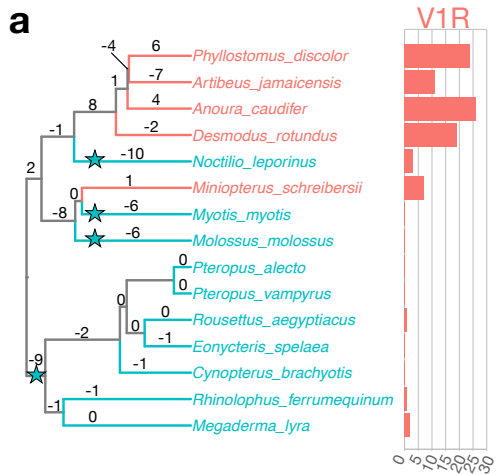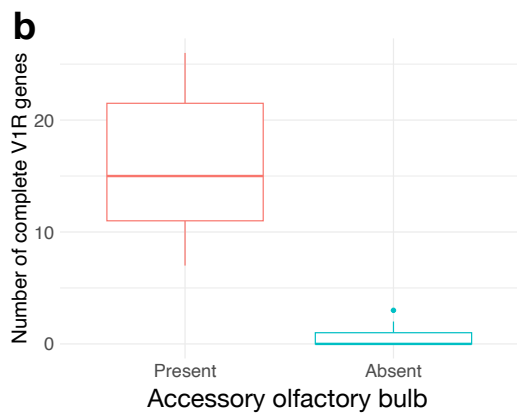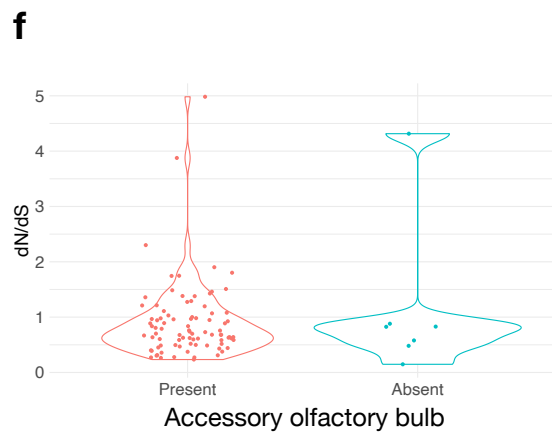

**c**

| Model                      | np  | Lnl           |
|----------------------------|-----|---------------|
| Free ratio model (M3)      | 371 | -32243.101136 |
| Two ratio model (M2)       | 188 | -32395.29902  |
| Null model (One-ratio, M1) | 187 | -32395.52876  |

**d**

| Models compared | LRT   | df  | p-value |
|-----------------|-------|-----|---------|
| M2 vs M1        | 0.46  | 1   | 0.5     |
| M3 vs M1        | 304.9 | 184 | 5E-08   |

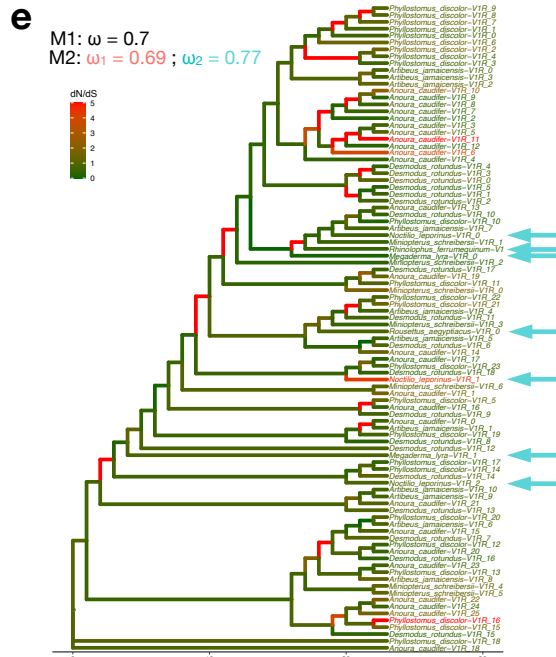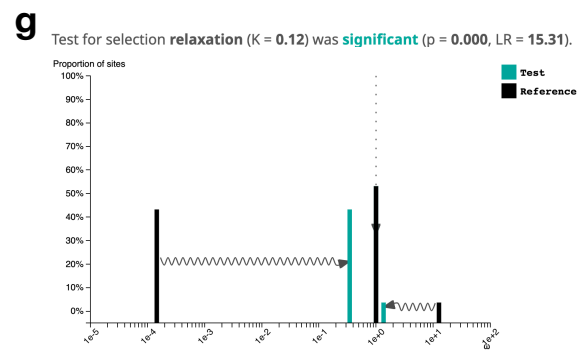

**Supplementary Fig. 32 | Phylogenies showing the number of complete *TIR* genes.** Vertebrate phylogeny and (sub)class phylogenies displaying the number of complete *TIR* genes (BUSCO80 dataset). **a**, Vertebrata; **b**, Agnatha; **c**, Chondrichthyes; **d**, Actinopterygii; **e**, Amphibia; **f**, Mammalia; **g**, Lepidosauria; **h**, Testudines; **i**, Aves and Crocodilia. Terminal branches and species names are colored according to (sub)class (**a**) or according to order based on the NCBI taxonomy database (**b-i**). *TIR*-subclades are indicated. Source data are provided as a Source Data file.

### a) Vertebrates

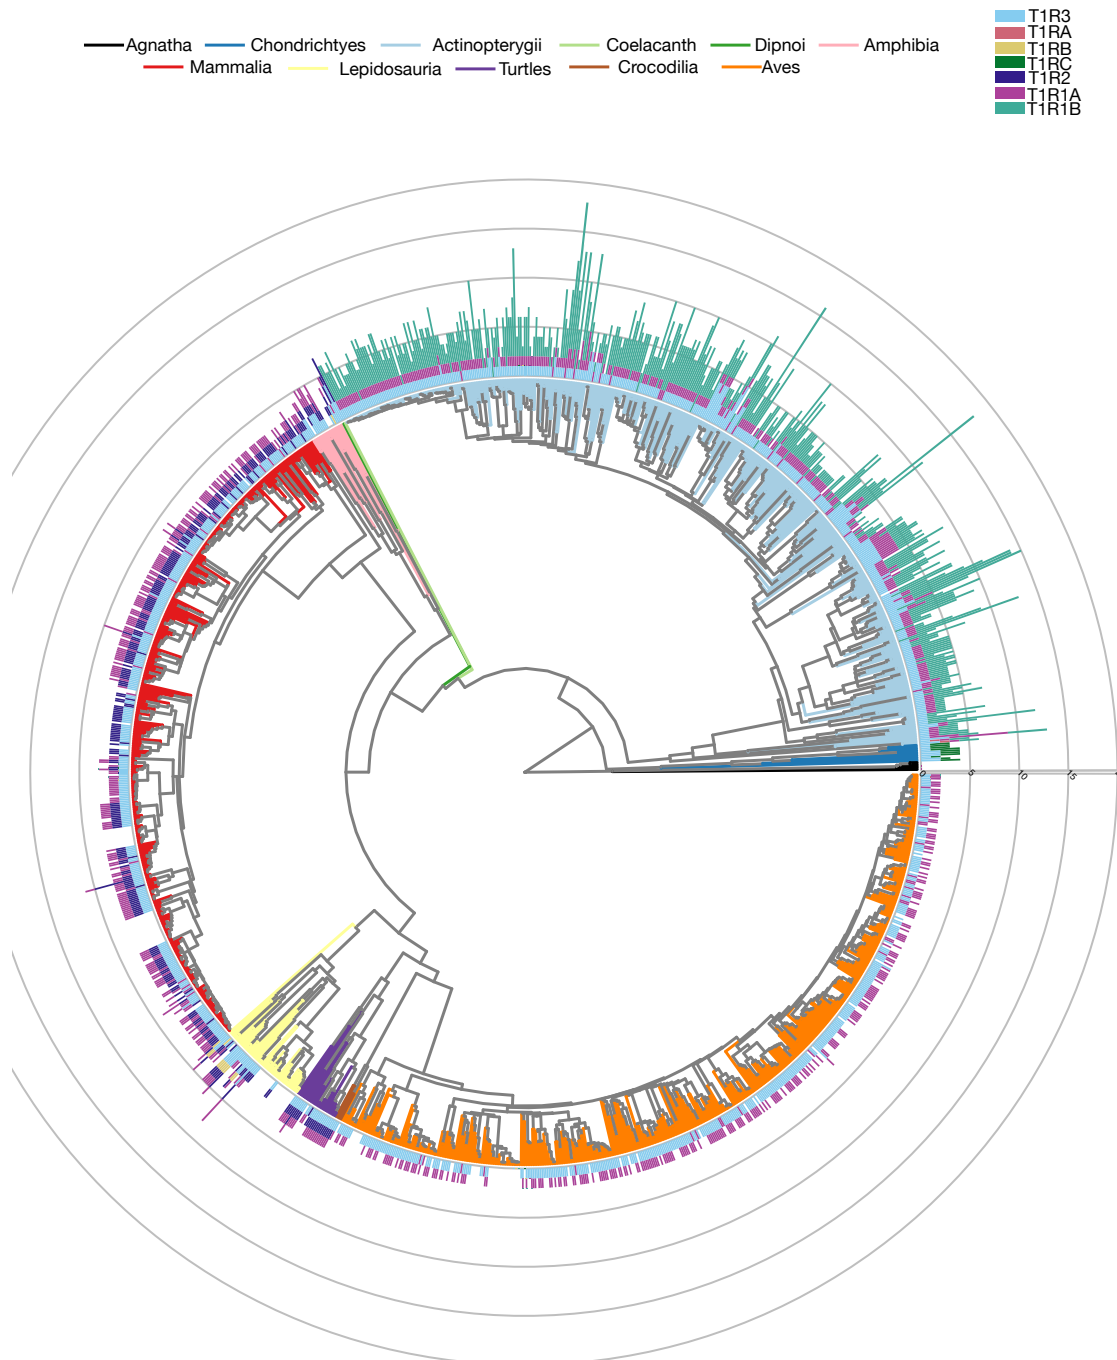

## b) Agnatha

No T1R genes in agnathans

## c) Chondrichthyes

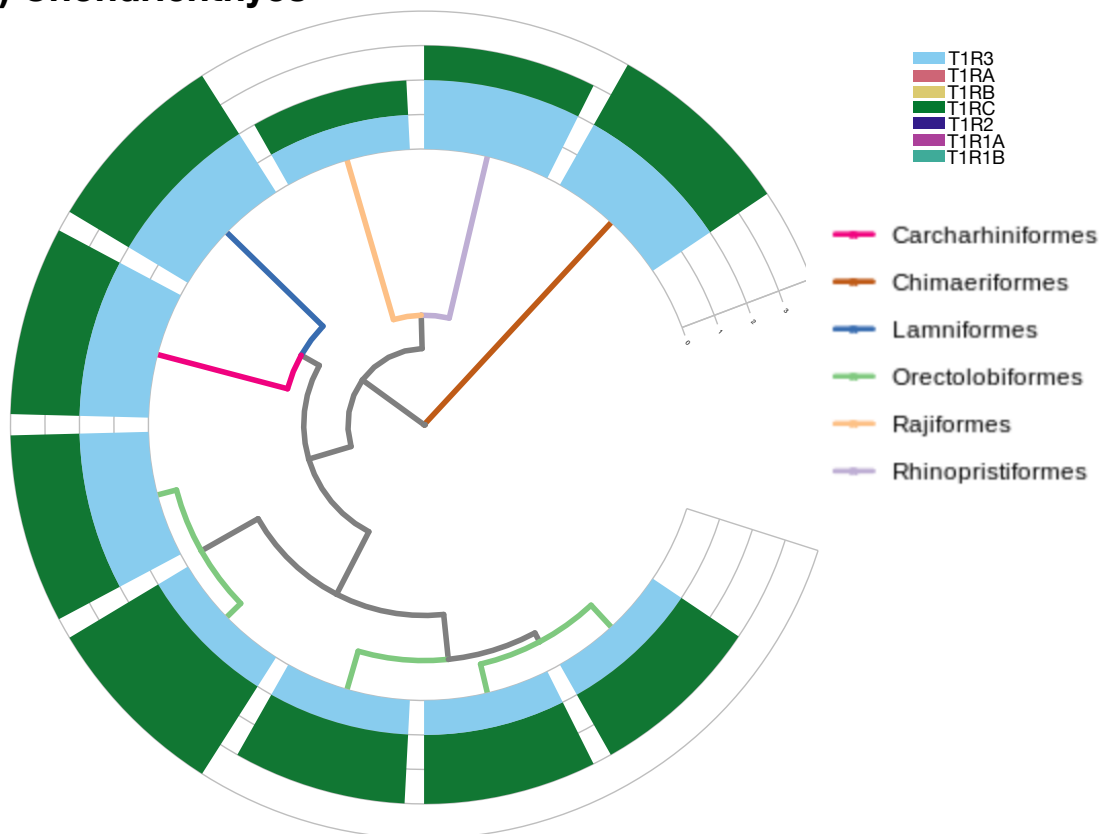

## d) Actinopterygii

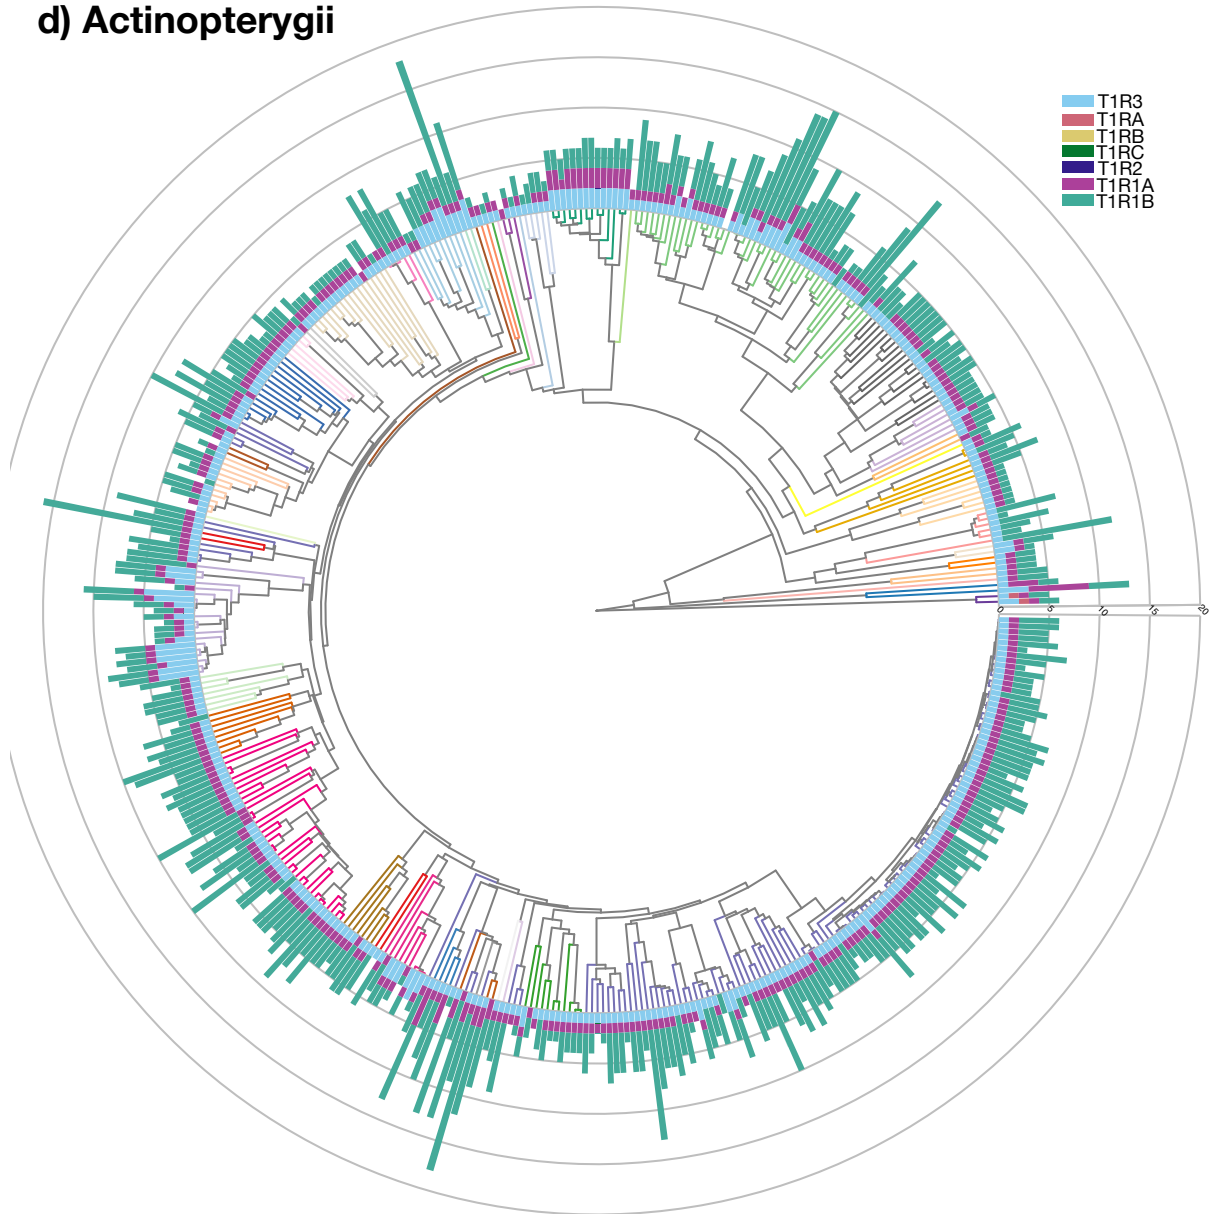

- |                     |                      |                     |
|---------------------|----------------------|---------------------|
| — Acanthuriformes   | — Cypriniformes      | — Lutjaniformes     |
| — Acipenseriformes  | — Cyprinodontiformes | — Mugiliformes      |
| — Albuliformes      | — Elopiformes        | — Ophidiiformes     |
| — Amiiformes        | — Esociformes        | — Osmeriformes      |
| — Anabantiformes    | — Eupercaria         | — Osteoglossiformes |
| — Anguilliformes    | — Gadiformes         | — Perciformes       |
| — Atheriniformes    | — Galaxiiformes      | — Pleuronectiformes |
| — Batrachoidiformes | — Gobiiformes        | — Polypteriformes   |
| — Beloniformes      | — Gonorynchiformes   | — Salmoniformes     |
| — Blenniiformes     | — Gymnotiformes      | — Scombriformes     |
| — Carangiformes     | — Holocentriformes   | — Semionotiformes   |
| — Centrarchiformes  | — Istiophoriformes   | — Siluriformes      |
| — Chaetodontiformes | — Kurtiformes        | — Spariformes       |
| — Characiformes     | — Labriformes        | — Synbranchiformes  |
| — Cichliformes      | — Lampriformes       | — Syngnathiformes   |
| — Clupeiformes      | — Lophiiformes       | — Tetraodontiformes |

# e) Amphibia

- Anura
- Caudata
- Gymnophiona
- T1R3
- T1RA
- T1RB
- T1RC
- T1R2
- T1R1A
- T1R1B

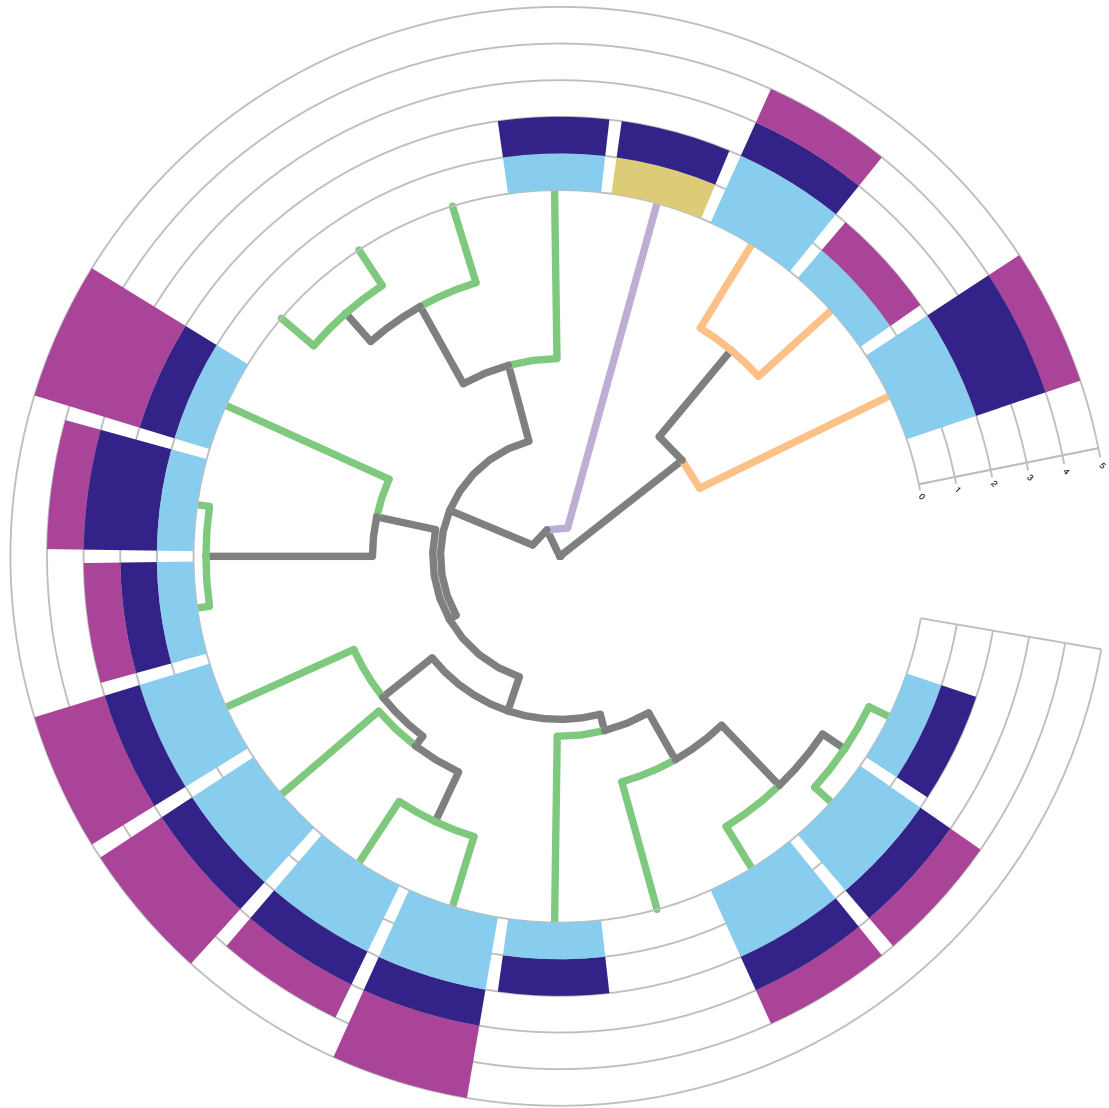

## f) Mammalia

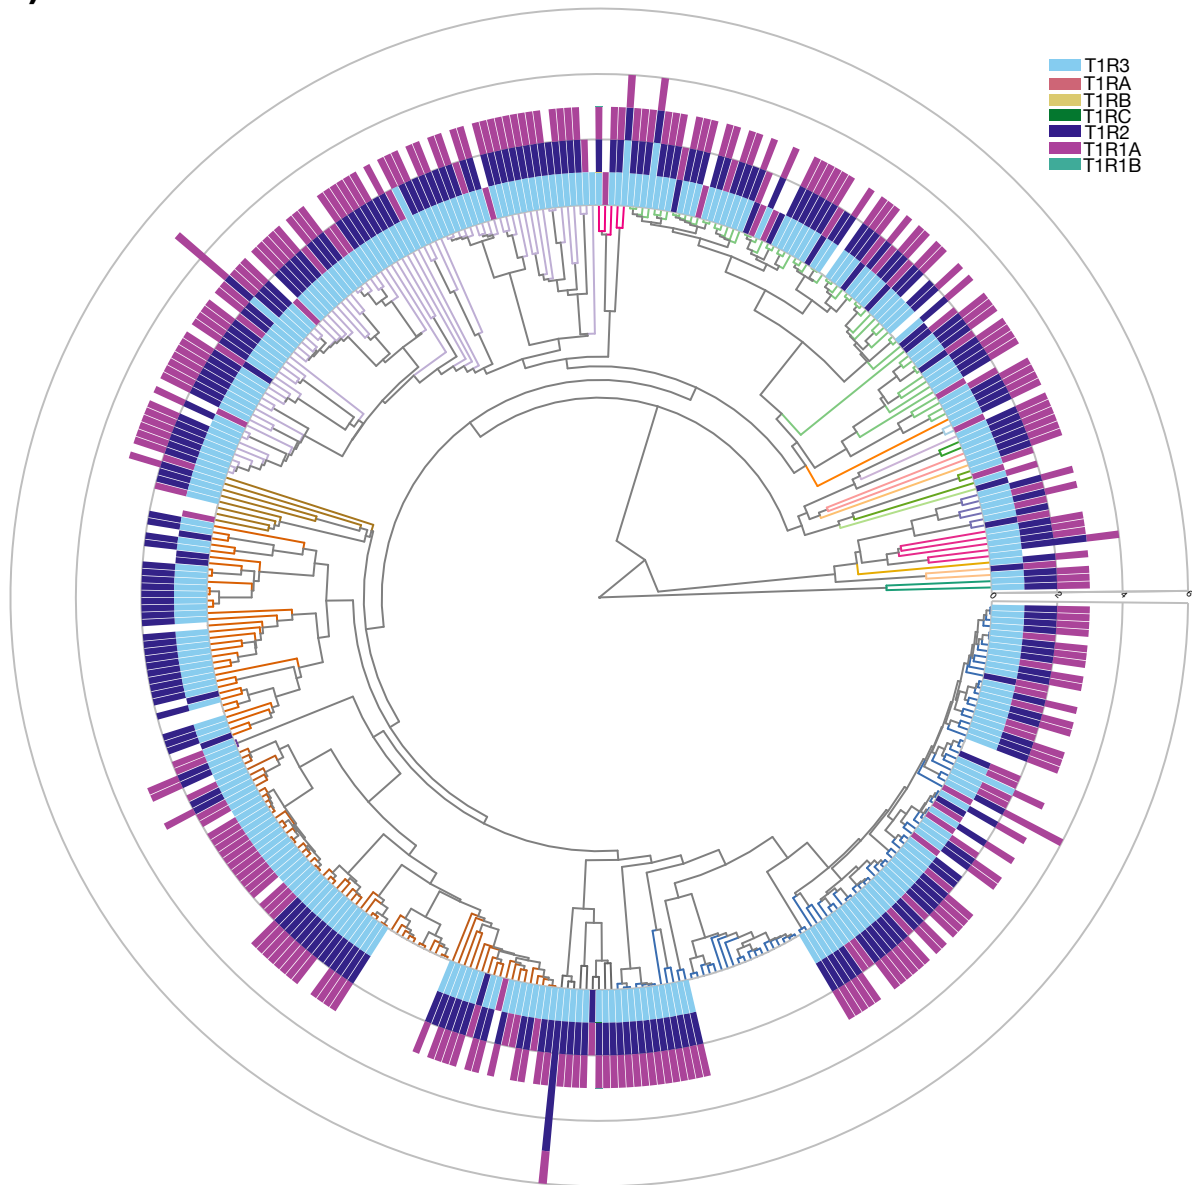

- |                   |                  |
|-------------------|------------------|
| — Afrotheria      | — Lagomorpha     |
| — Artiodactyla    | — Macroscelidea  |
| — Carnivora       | — Microbiotheria |
| — Chiroptera      | — Monotremata    |
| — Cingulata       | — Perissodactyla |
| — Dasyuromorphia  | — Pholidota      |
| — Dermoptera      | — Pilosa         |
| — Didelphimorphia | — Primates       |
| — Diprotodontia   | — Proboscidea    |
| — Eulipotyphla    | — Rodentia       |
| — Hyracoidea      | — Sirenia        |



# g) Lepidosauria

— Sphenodontia  
— Squamata

T1R3  
T1RA  
T1RB  
T1RC  
T1R2  
T1R1A  
T1R1B

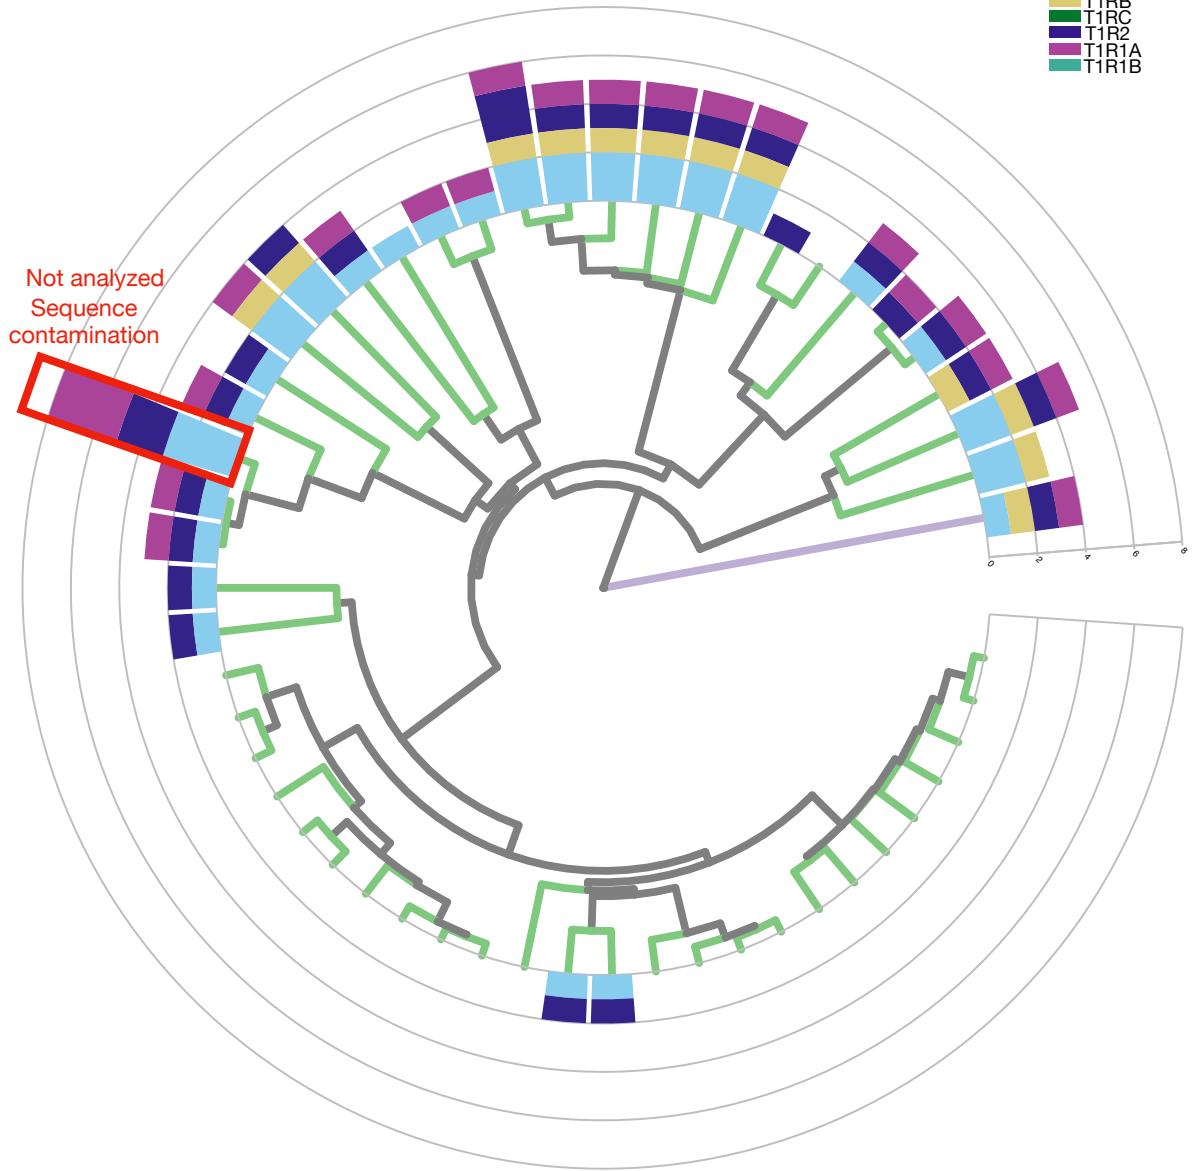

# h) Turtles

— Testudines

- T1R3
- T1RA
- T1RB
- T1RC
- T1R2
- T1R1A
- T1R1B

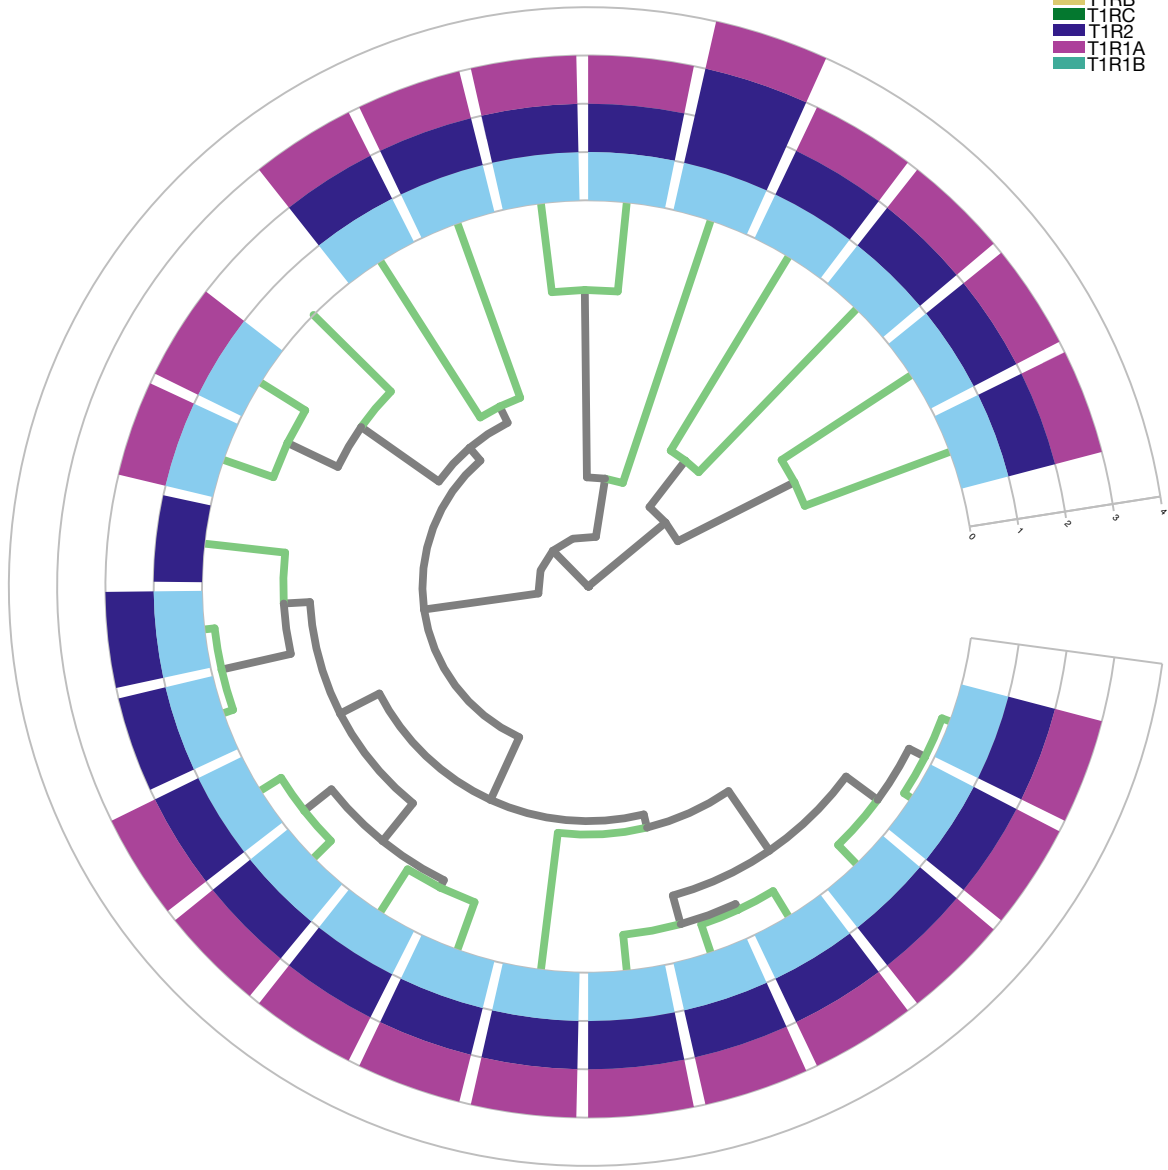

## i) Aves (with Crocodylia as outgroup)

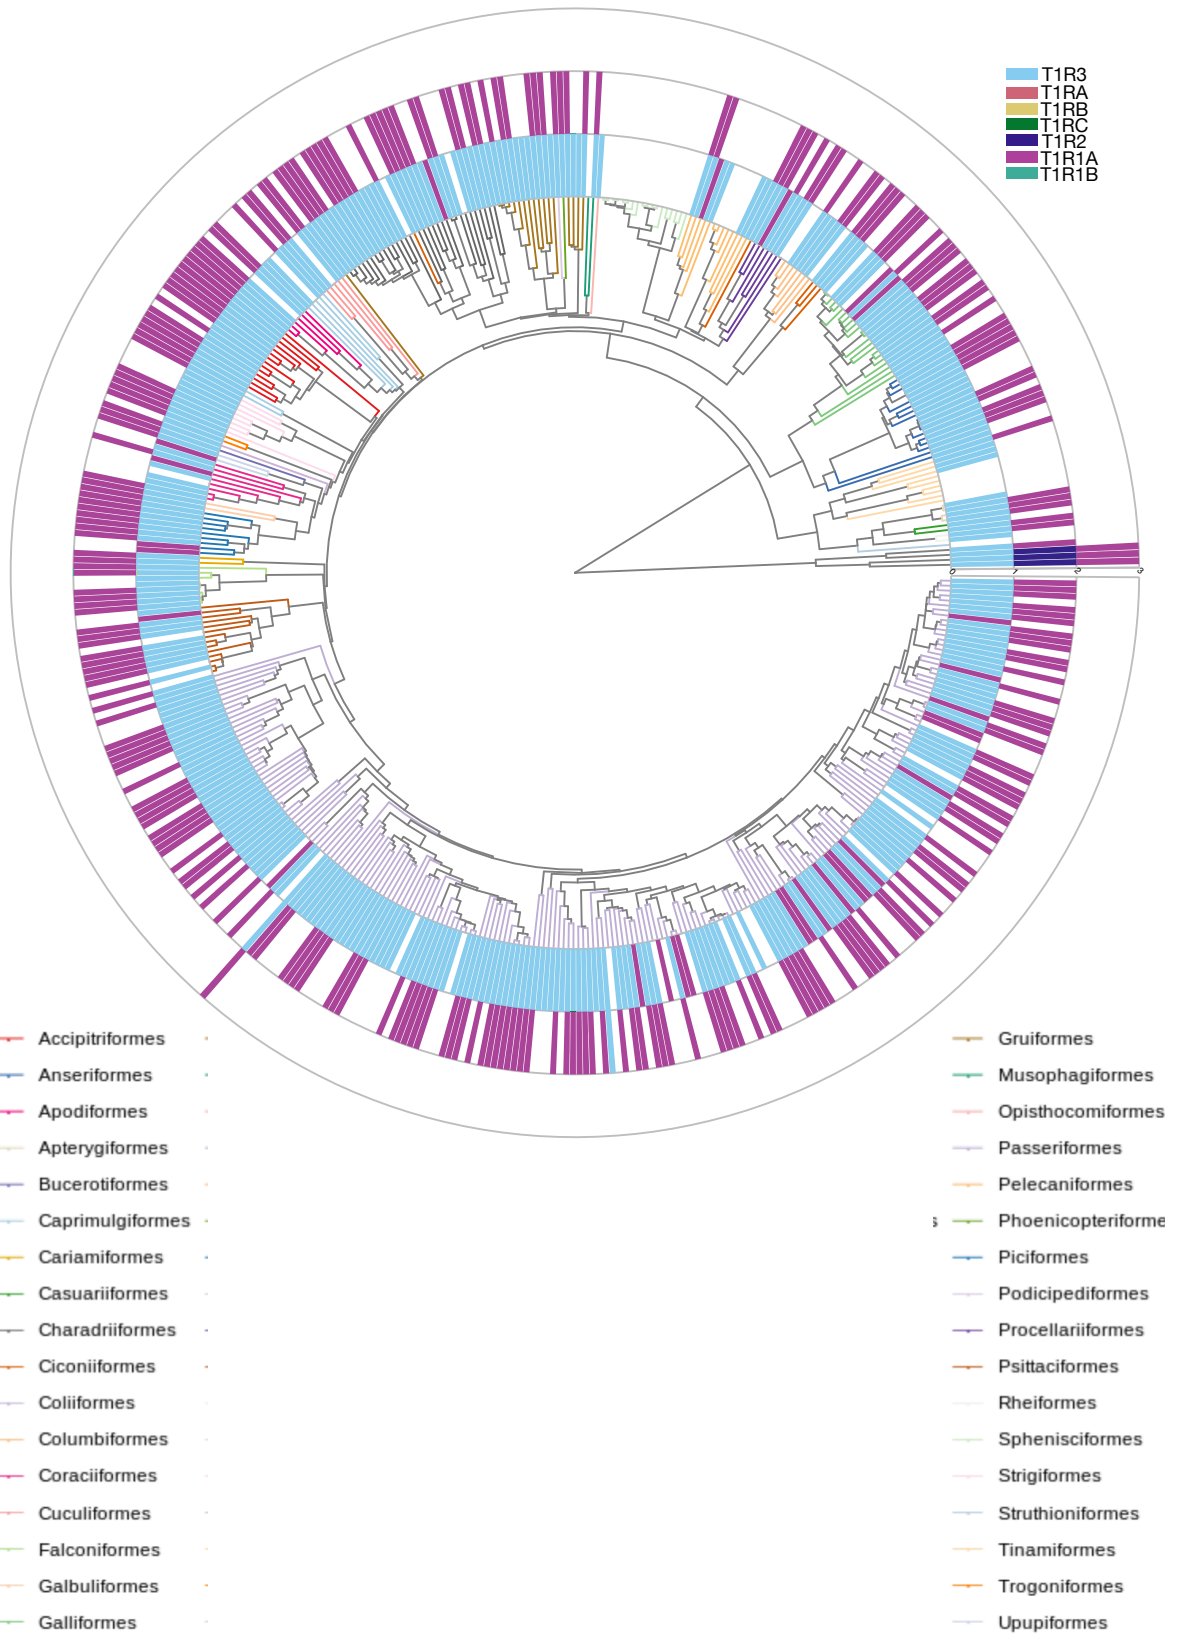

**Supplementary Fig. 33 | Vertebrate *T1R* gene tree.** **a**, Near maximum likelihood phylogeny of *T1R* genes of vertebrates with branches colored according to the vertebrate (sub)class. **b**, Clade tree generated from (a) with local support values indicated at each node (according to a Shimodaira-Hasegawa test). We kept the former clades names *T1R1* (umami receptor subunit), *T1R2* (sweet receptor subunit) and *T1R3*. We also describe here a ray-finned fish specific clade (*T1R1B*), which may be part of *T1R1* or *T1R2* (the support value is too low to distinguish between these scenarios). Furthermore, we found three additional clades: *T1RA*, which is specific to Polypteriformes; *T1RB*, which is specific to amphibians and lepidosaurs; and *T1RC*, which is specific to cartilaginous fishes. Note that the presence of the *T1RC* clade was already suggested by Angotzi et al.<sup>36</sup>. An alternative, but rather similar *T1R* topology has recently been proposed by Nishihara et al.<sup>37</sup>. The tree in newick version, as well as all sequences and the alignment file can be found in FigShare. Sub-trees of each vertebrate (sub)class with the number of *T1R* genes are shown in Supplementary Fig. 32. Maximum likelihood phylogeny of *T1R* genes extracted from one species per vertebrate (sub)class is shown in Supplementary Fig. 34.

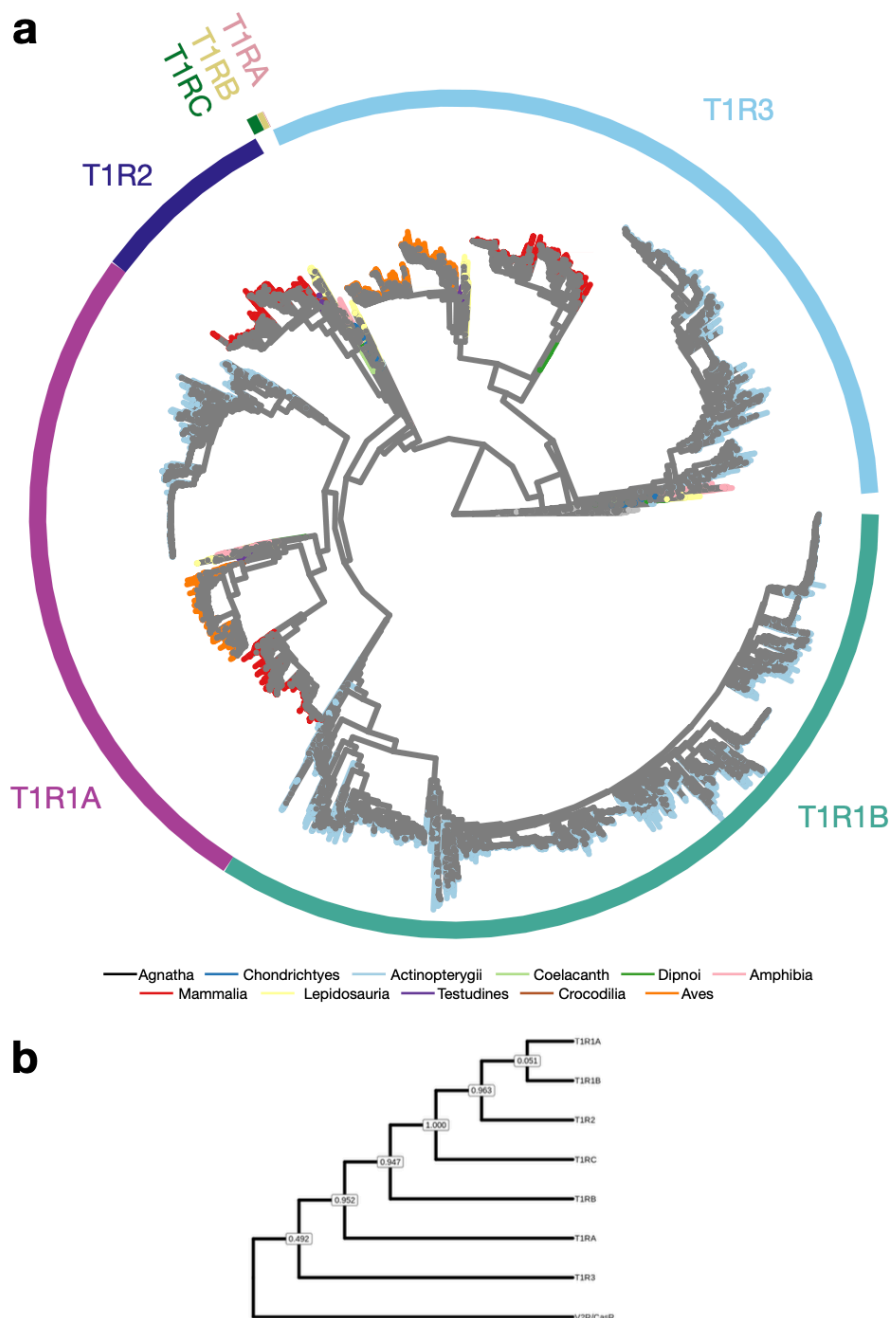

**Supplementary Fig. 34 | Maximum likelihood phylogeny of *T1R* genes.** Maximum likelihood phylogeny of *T1R* genes extracted from one representative species per vertebrate subclass. Branches are colored according to the vertebrate (sub)class. For ray-finned fishes, two species were sampled: *Danio rerio* and *Polypterus senegalus*. Branches belonging to these species were differentiated by adding “Dr” or “Ps” at the tip of the branches respectively. *T1R* subclades are indicated (*T1RB* and *T1RA* clades were written at the tips of the corresponding branches as there was only one sequence for these clades). The tree was computed using the optimal model found by ModelFinder (LG+R5). The robustness of the nodes was evaluated with 1,000 ultrafast bootstraps and these bootstrap values are indicated at each node. All the clades retrieved using the near-ML method were retrieved as monophyletic, and the exact same topology was retrieved.

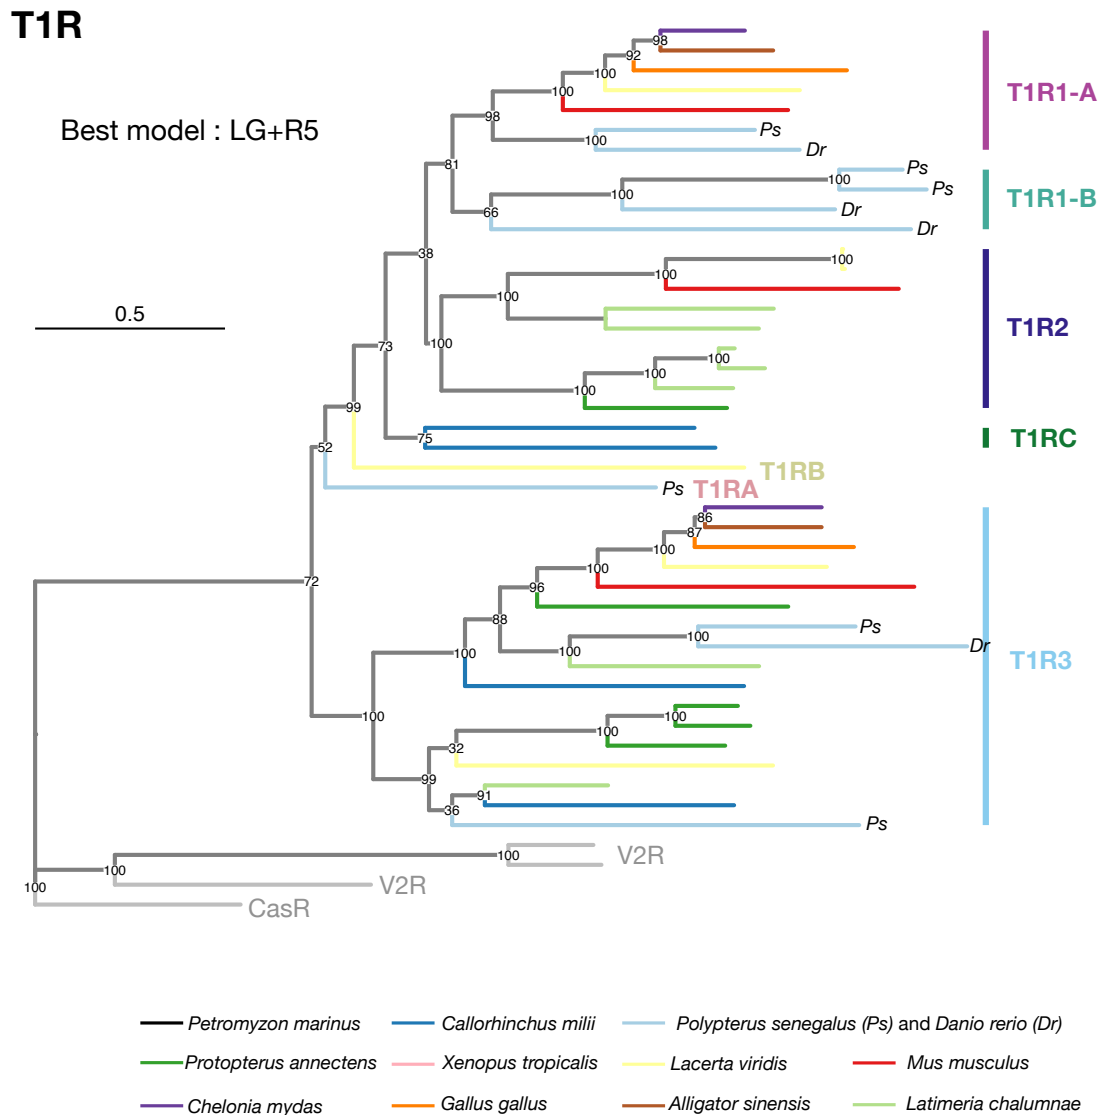

**Supplementary Fig. 35 | Evolutionary history of T1R and T2R genes in vertebrates.** **a**, Schematic of the T1R gene tree (top) indicating the subclades within the T1R gene family in vertebrates. Gene duplication events leading to subclade divergence are indicated as triangles on the respective branches in the schematic vertebrate phylogeny (left), subclade losses are indicated with the cross symbol below the respective branches. The numbers refer to nodes in the gene tree. Circles on the right indicate the presence of a particular subclade in a given evolutionary lineage, whereby the size of each circle corresponds to the mean number of complete T1R genes per species in the respective subclade and lineage. The T1R gene tree is shown in Supplementary Fig. 33. The T1RA subclade present in non-teleost fish but absent in teleosts is marked with an “\*”. An alternative, but overall similar, scenario for T1R evolution was proposed by Nishihara et al.<sup>37</sup> **b**, Schematic of the T2R gene tree (top) indicating the subclades within the T2R gene family in vertebrates. Gene duplication events are indicated as triangles on the respective branches in the schematic vertebrate phylogeny (left), subclade losses are indicated with the cross symbol. The numbers refer to nodes in the gene tree. Circles on the right indicate the presence of a particular subclade in a given evolutionary lineage, whereby the size of each circle corresponds to the mean number of complete T2R genes per species in the respective subclade and lineage. The T2R gene tree is shown in Supplementary Fig. 42. Source data are provided as a Source Data file.

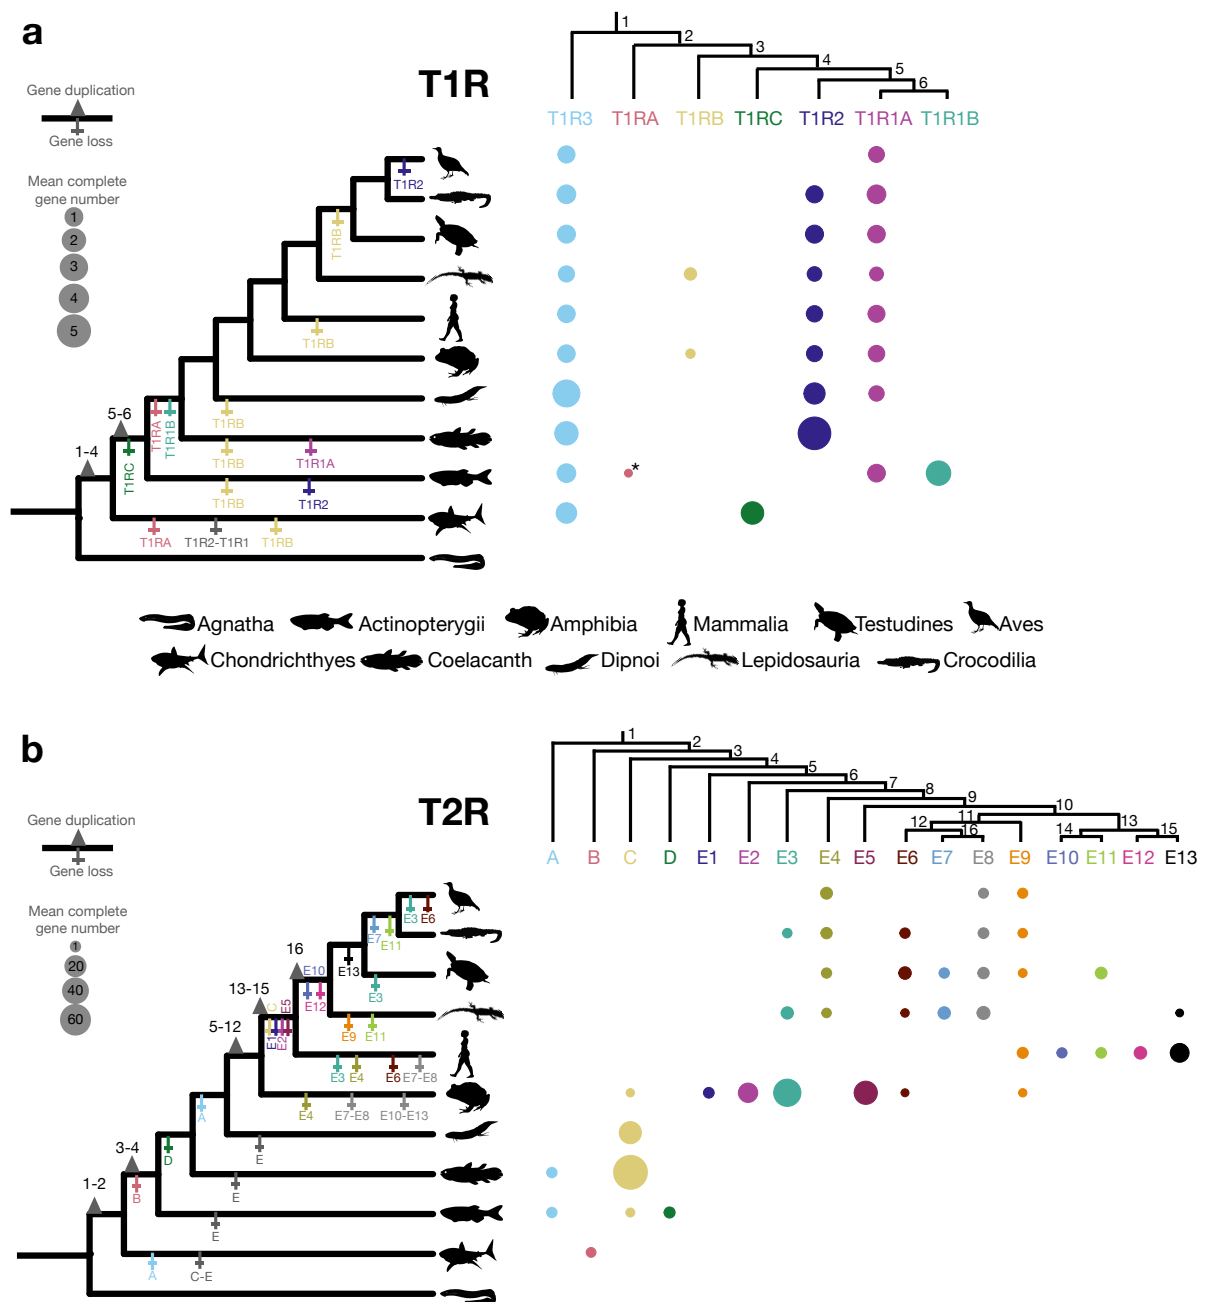

**Supplementary Fig. 36 | Phylogenies showing the number of complete *T2R* genes.** Vertebrate phylogeny and (sub)class phylogenies displaying the number of complete *T2R* genes (BUSCO80 dataset). **a**, Vertebrata; **b**, Agnatha; **c**, Chondrichthyes; **d**, Actinopterygii; **e**, Amphibia; **f**, Mammalia; **g**, Lepidosauria; **h**, Testudines; **i**, Aves and Crocodylia. Terminal branches and species names are colored according to (sub)class (**a**) or according to order based on the NCBI taxonomy database (**b-i**). *T2R*-subclades are indicated. Source data are provided as a Source Data file.

### a) Vertebrates

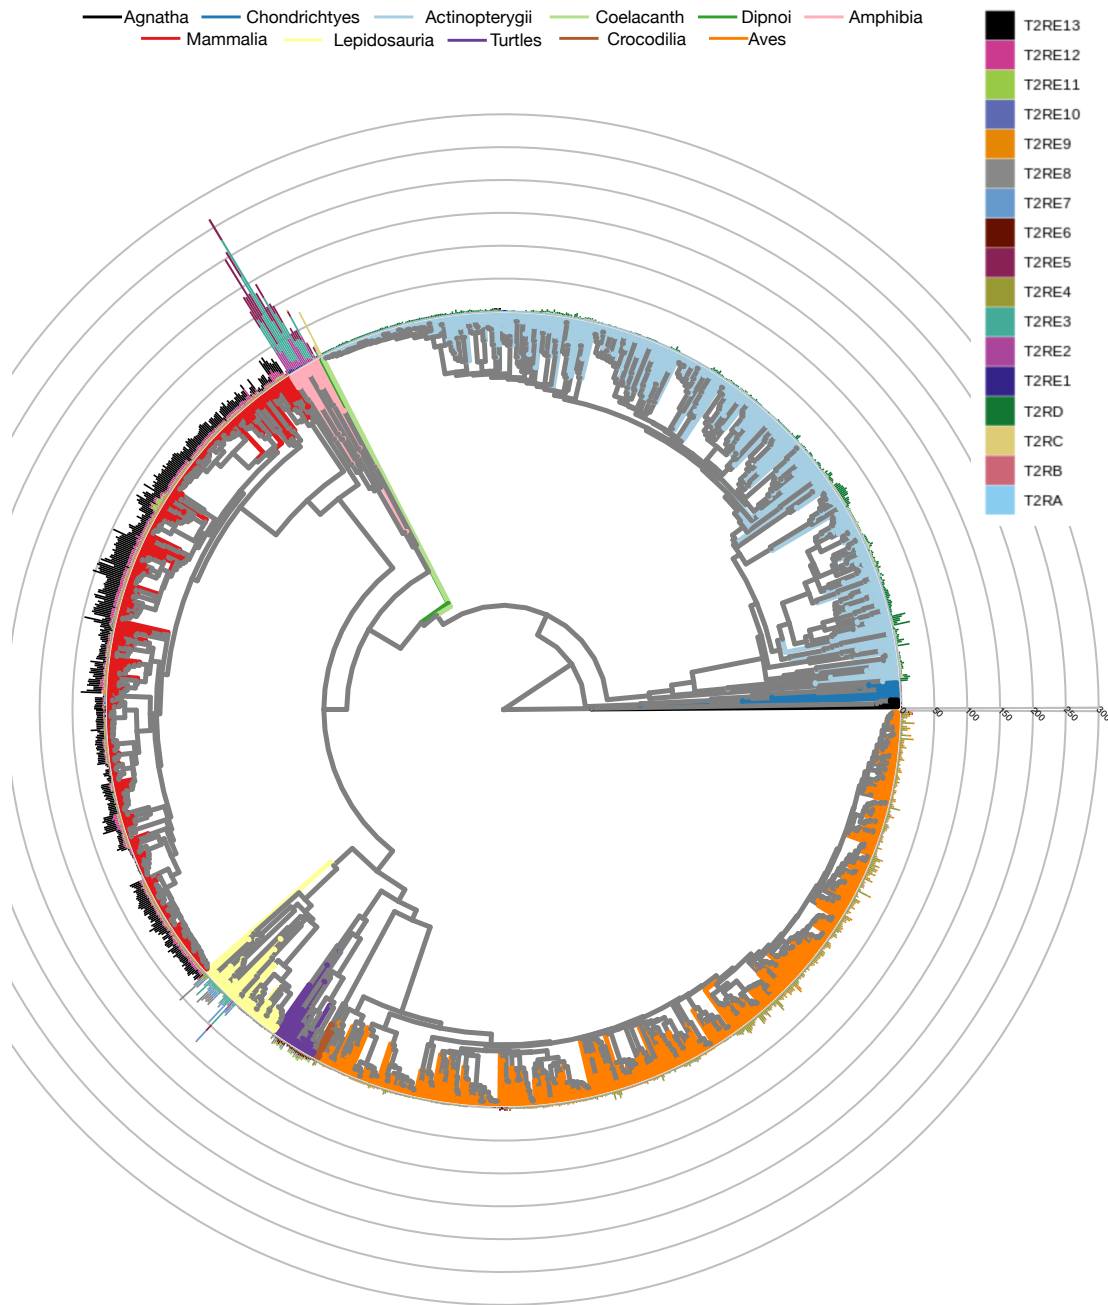

**b) Agnatha**

**No T2R genes in agnathans**

**c) Chondrichthyes**

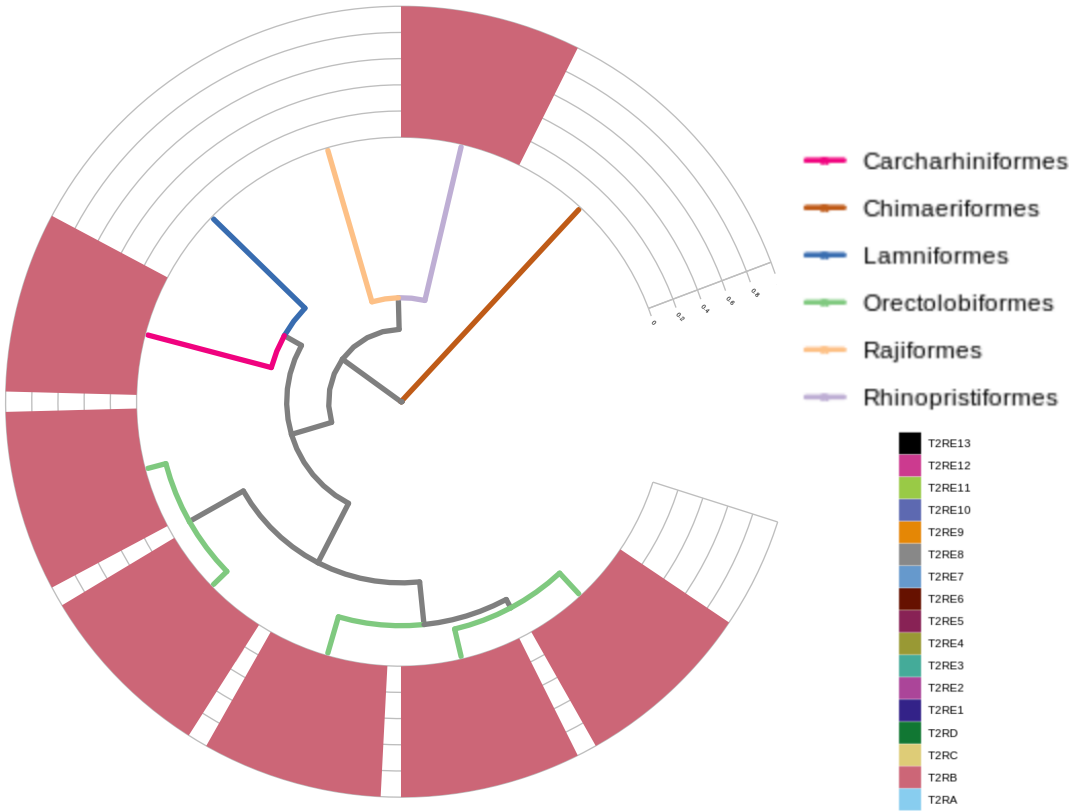



## d) Actinopterygii

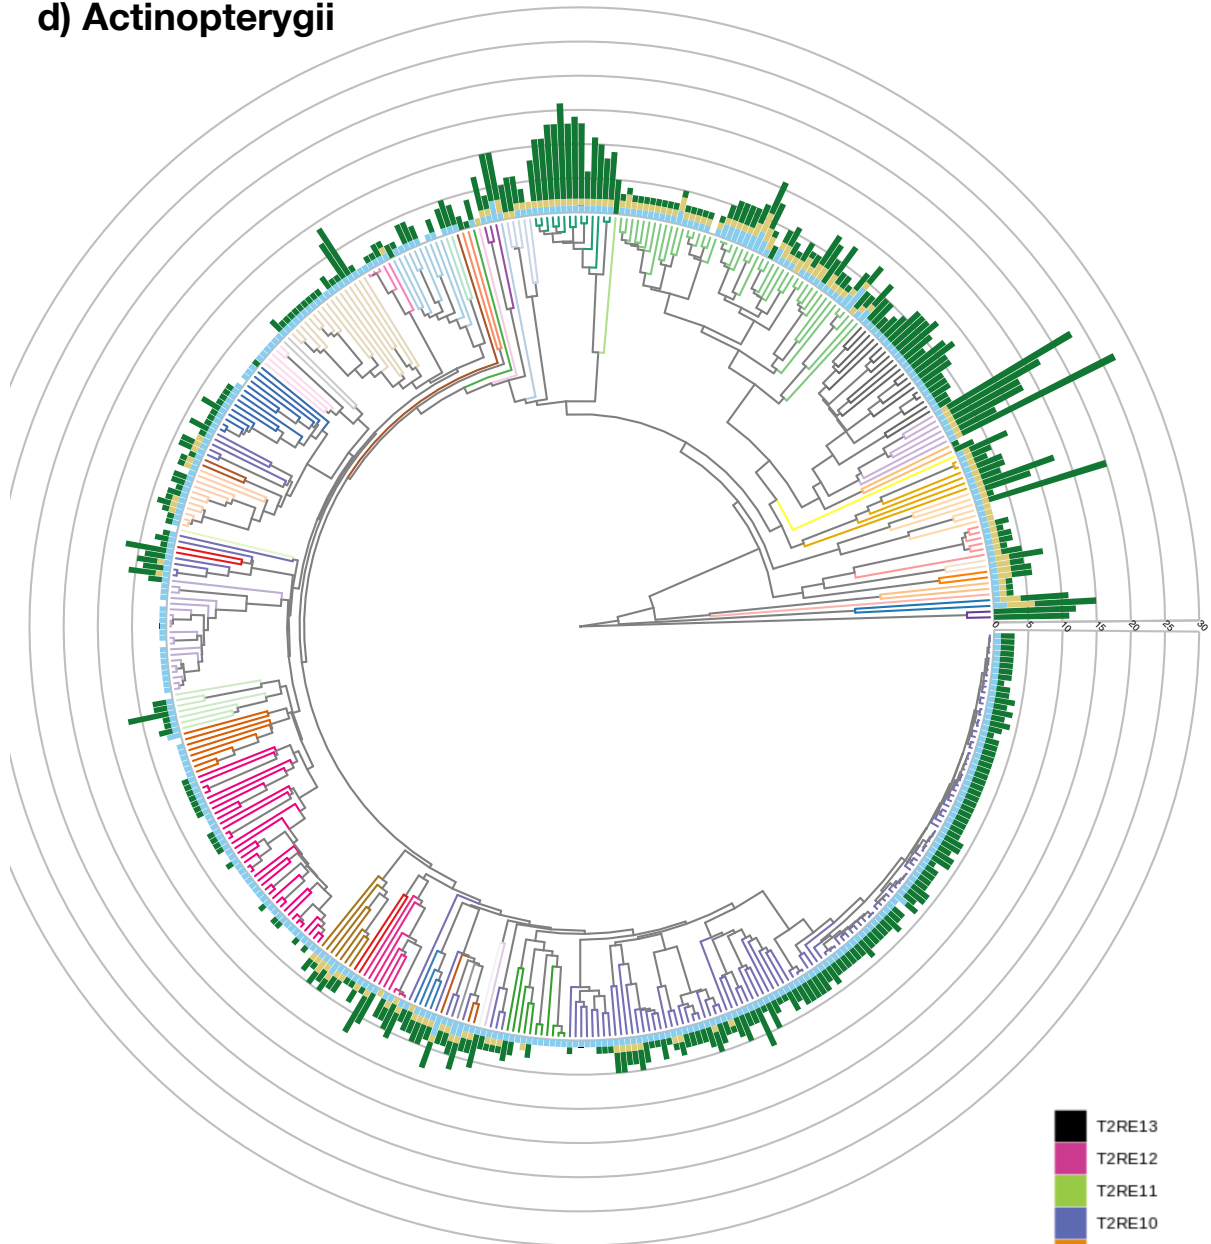

- |                     |                      |                     |
|---------------------|----------------------|---------------------|
| — Acanthuriformes   | — Cypriniformes      | — Lutjaniformes     |
| — Acipenseriformes  | — Cyprinodontiformes | — Mugiliformes      |
| — Albuliformes      | — Elopiformes        | — Ophidiiformes     |
| — Amiiformes        | — Esociformes        | — Osmeriformes      |
| — Anabantiformes    | — Eupercaria         | — Osteoglossiformes |
| — Anguilliformes    | — Gadiformes         | — Perciformes       |
| — Atheriniformes    | — Galaxiiformes      | — Pleuronectiformes |
| — Batrachoidiformes | — Gobiiformes        | — Polypteriformes   |
| — Belontiiformes    | — Gonorynchiformes   | — Salmoniformes     |
| — Blenniiformes     | — Gymnotiformes      | — Scombriformes     |
| — Carangiformes     | — Holocentriformes   | — Semionotiformes   |
| — Centrarchiformes  | — Istiophoriformes   | — Siluriformes      |
| — Chaetodontiformes | — Kurtiformes        | — Spariformes       |
| — Characiformes     | — Labriformes        | — Synbranchiformes  |
| — Cichliformes      | — Lampriformes       | — Syngnathiformes   |
| — Clupeiformes      | — Lophiiformes       | — Tetraodontiformes |

- T2RE13
- T2RE12
- T2RE11
- T2RE10
- T2RE9
- T2RE8
- T2RE7
- T2RE6
- T2RE5
- T2RE4
- T2RE3
- T2RE2
- T2RE1
- T2RD
- T2RC
- T2RB
- T2RA

# e) Amphibia

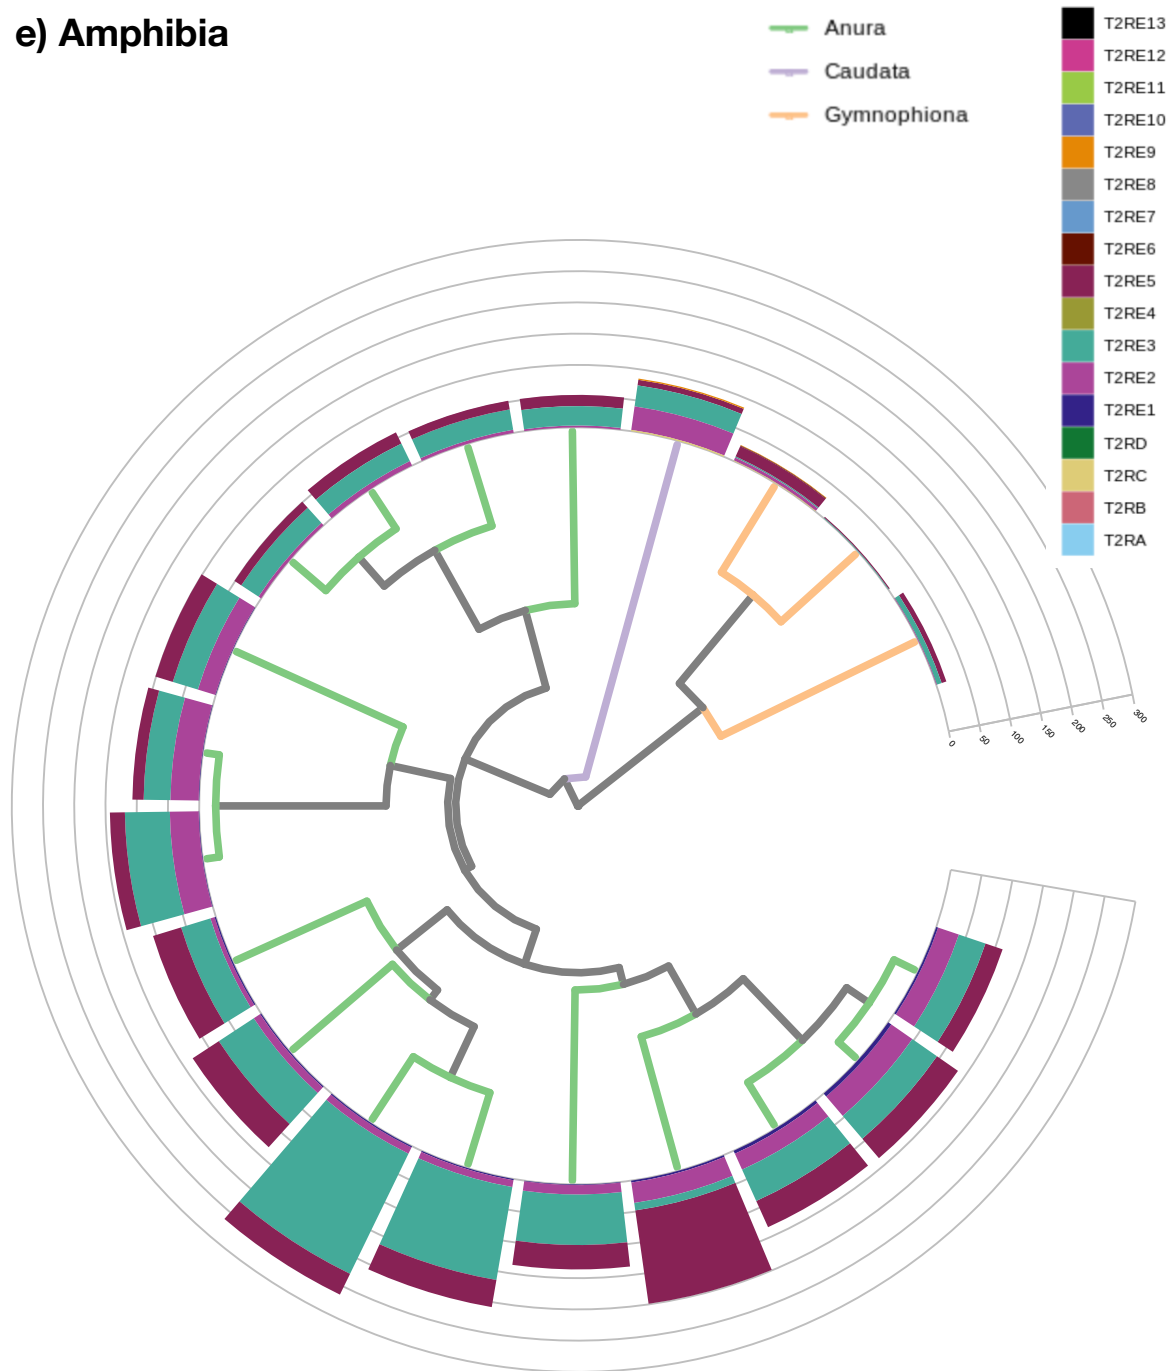

## f) Mammalia

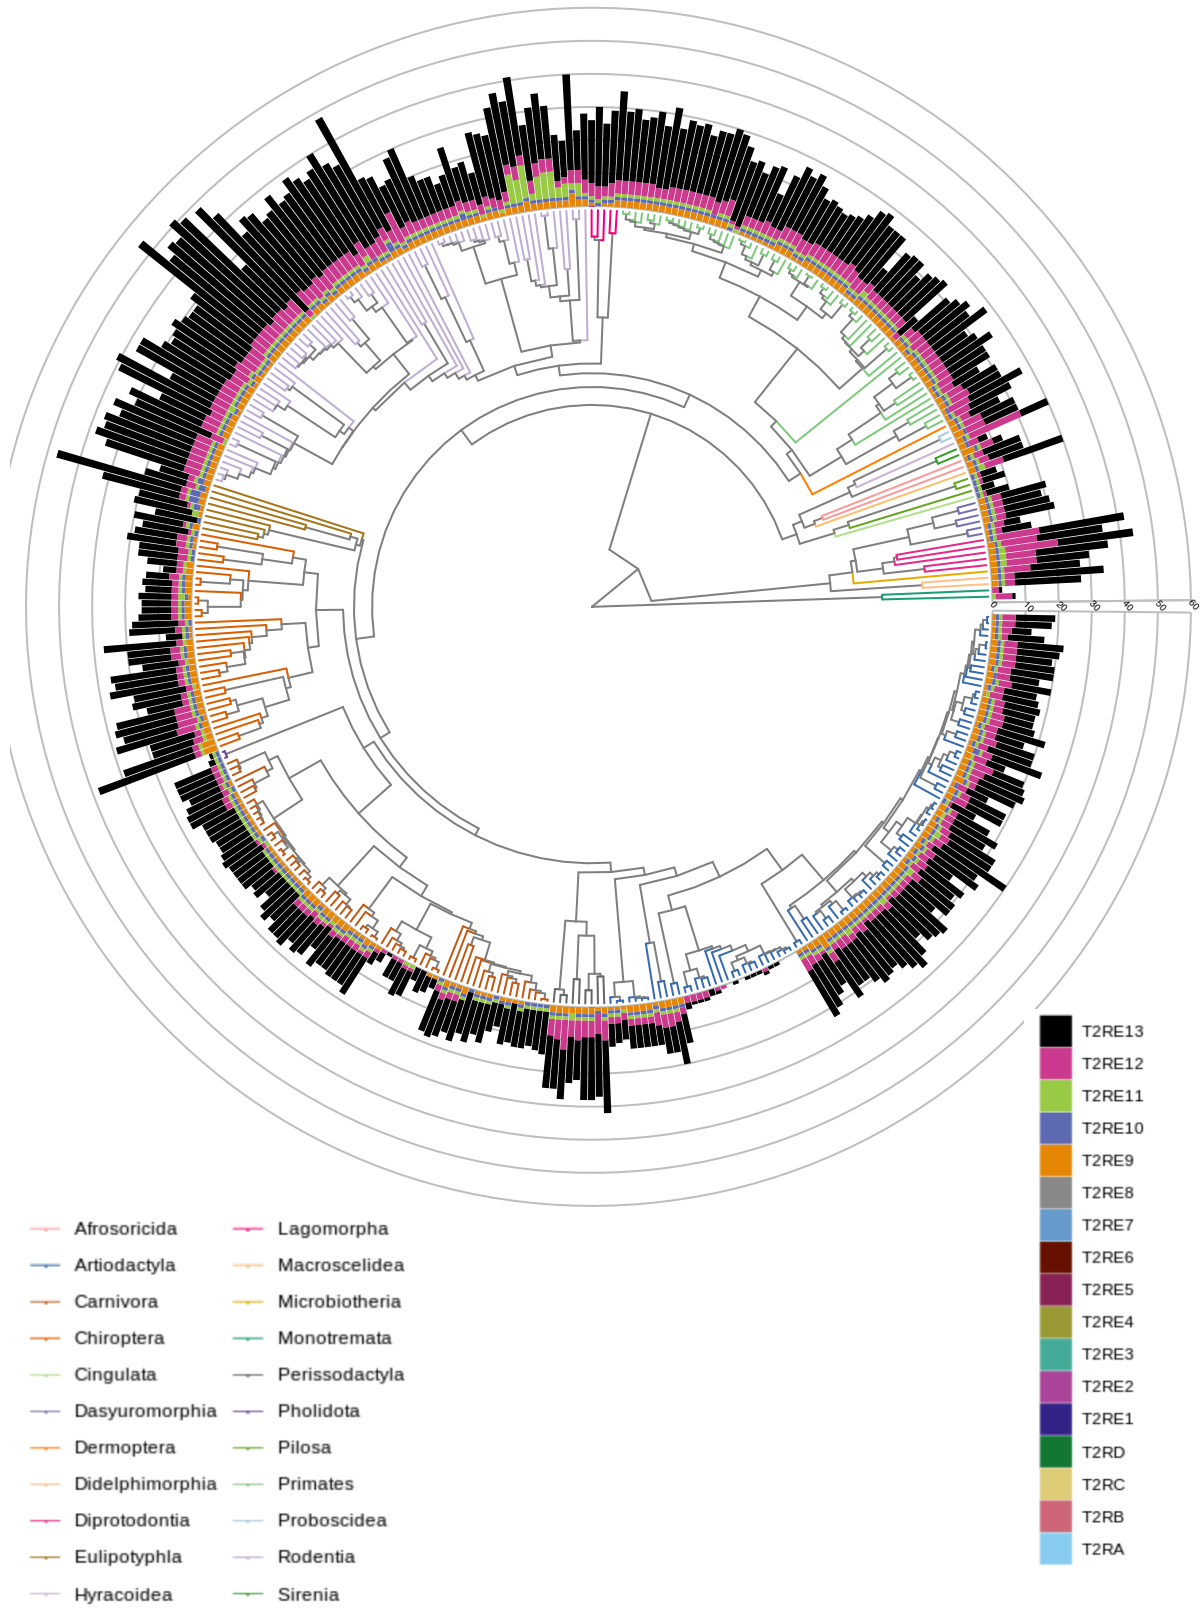

# g) Lepidosauria

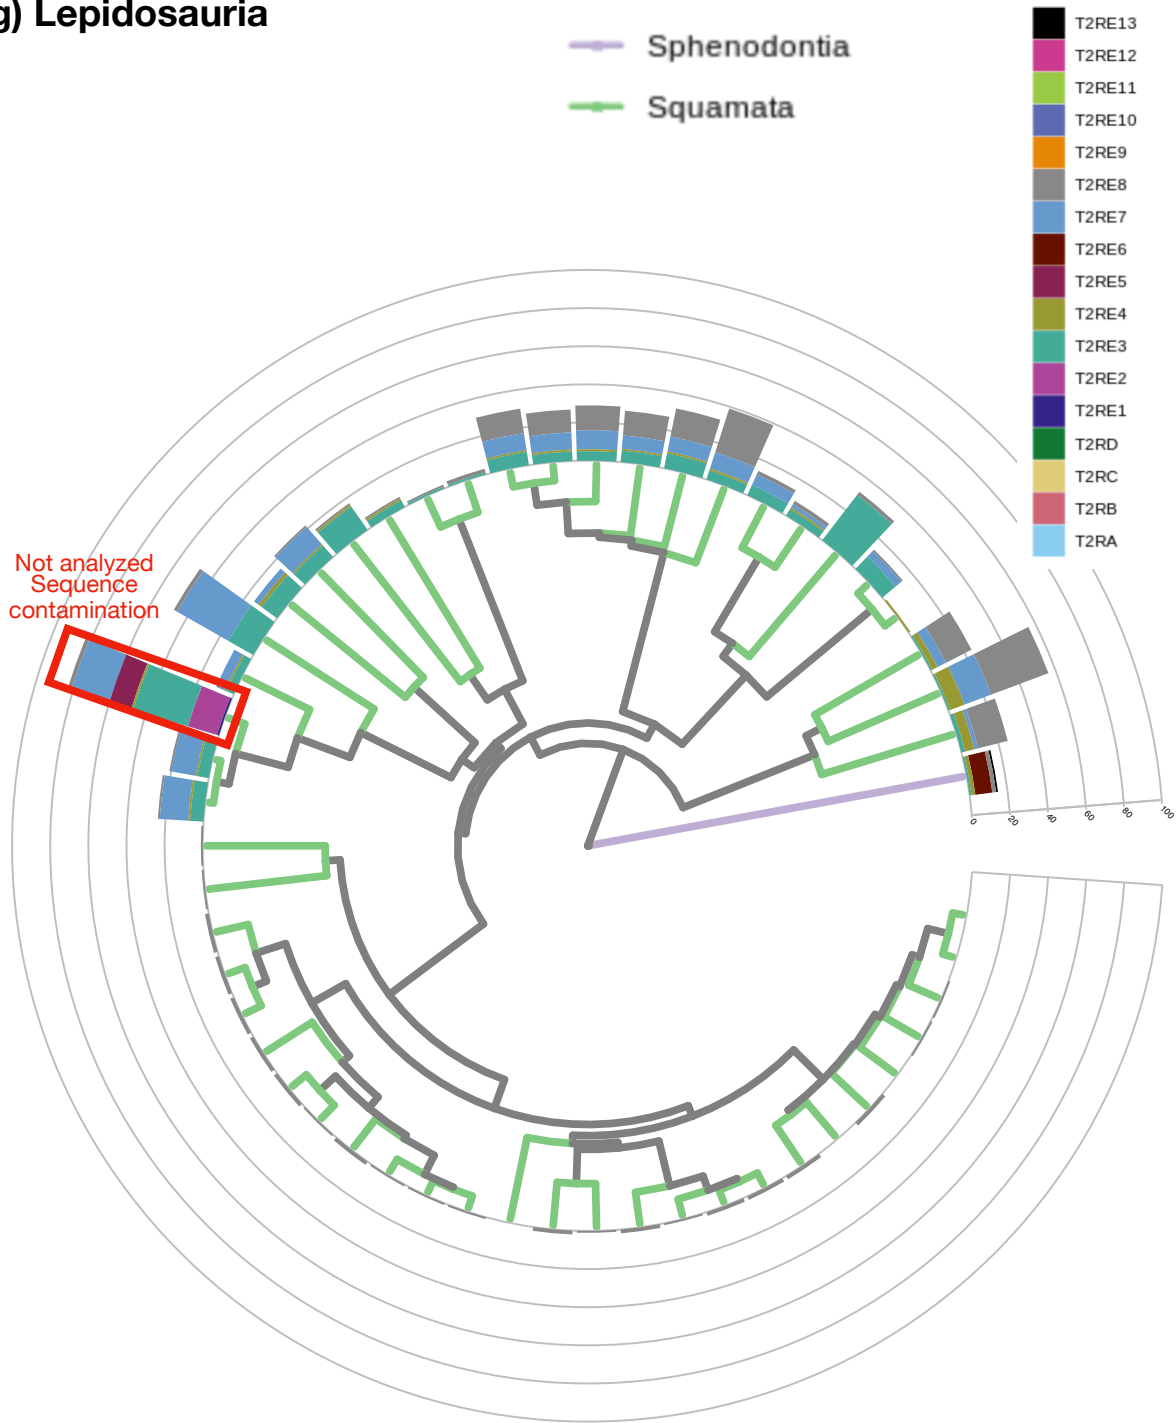

# h) Turtles

— Testudines

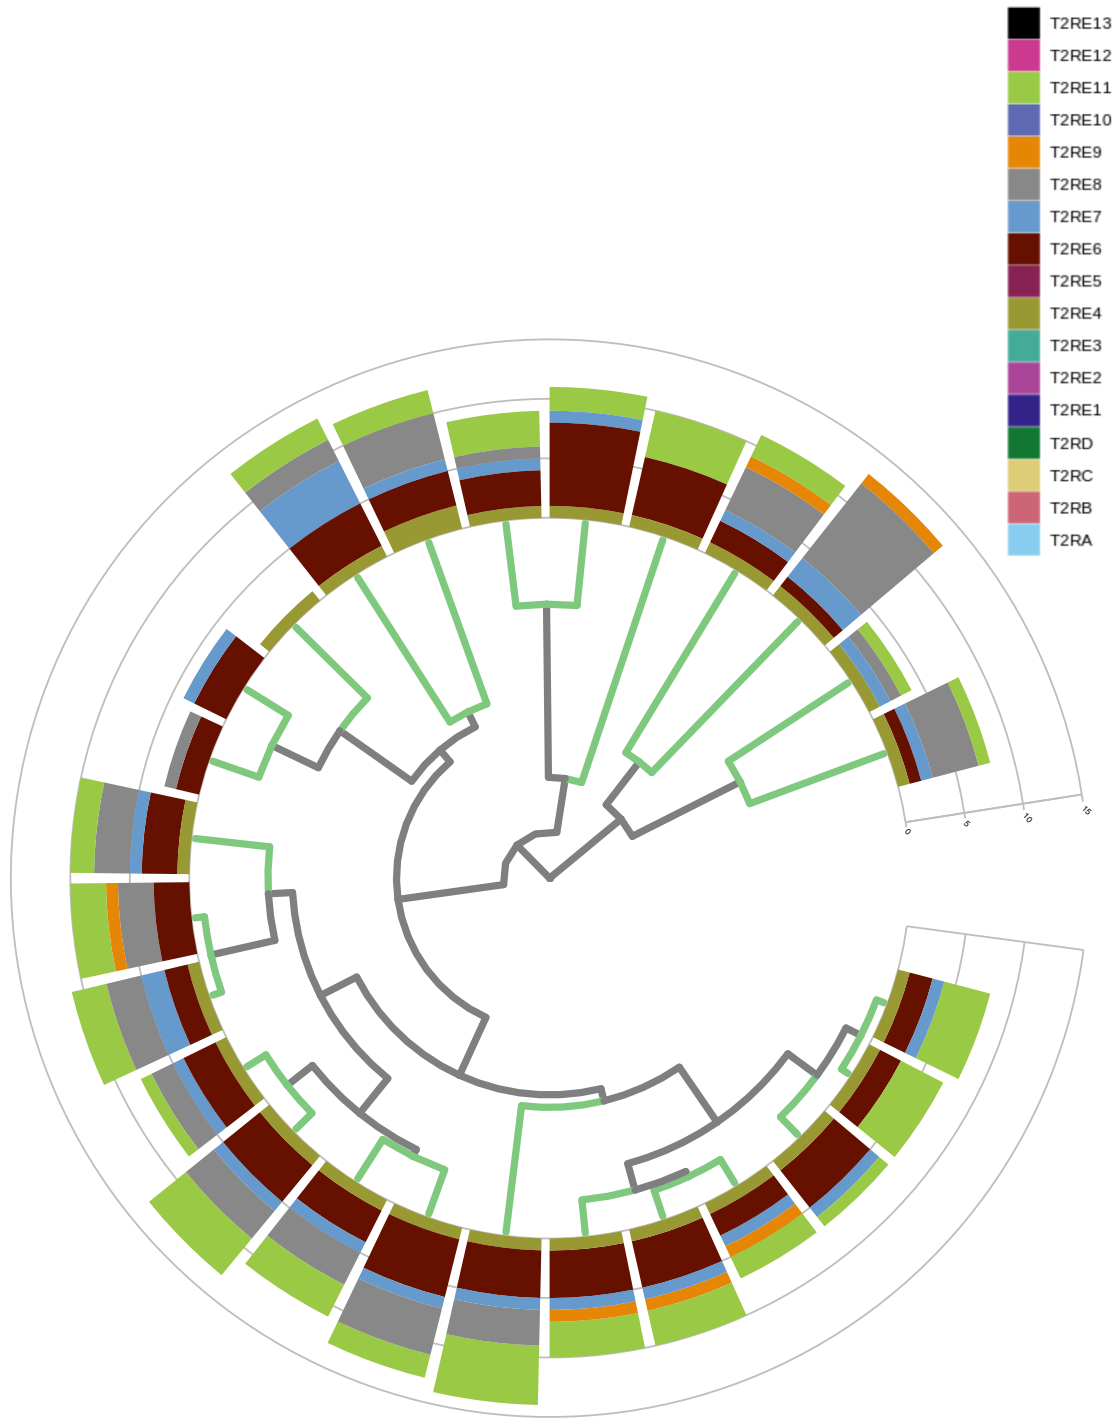

# i) Aves (with Crocodylia as outgroup)

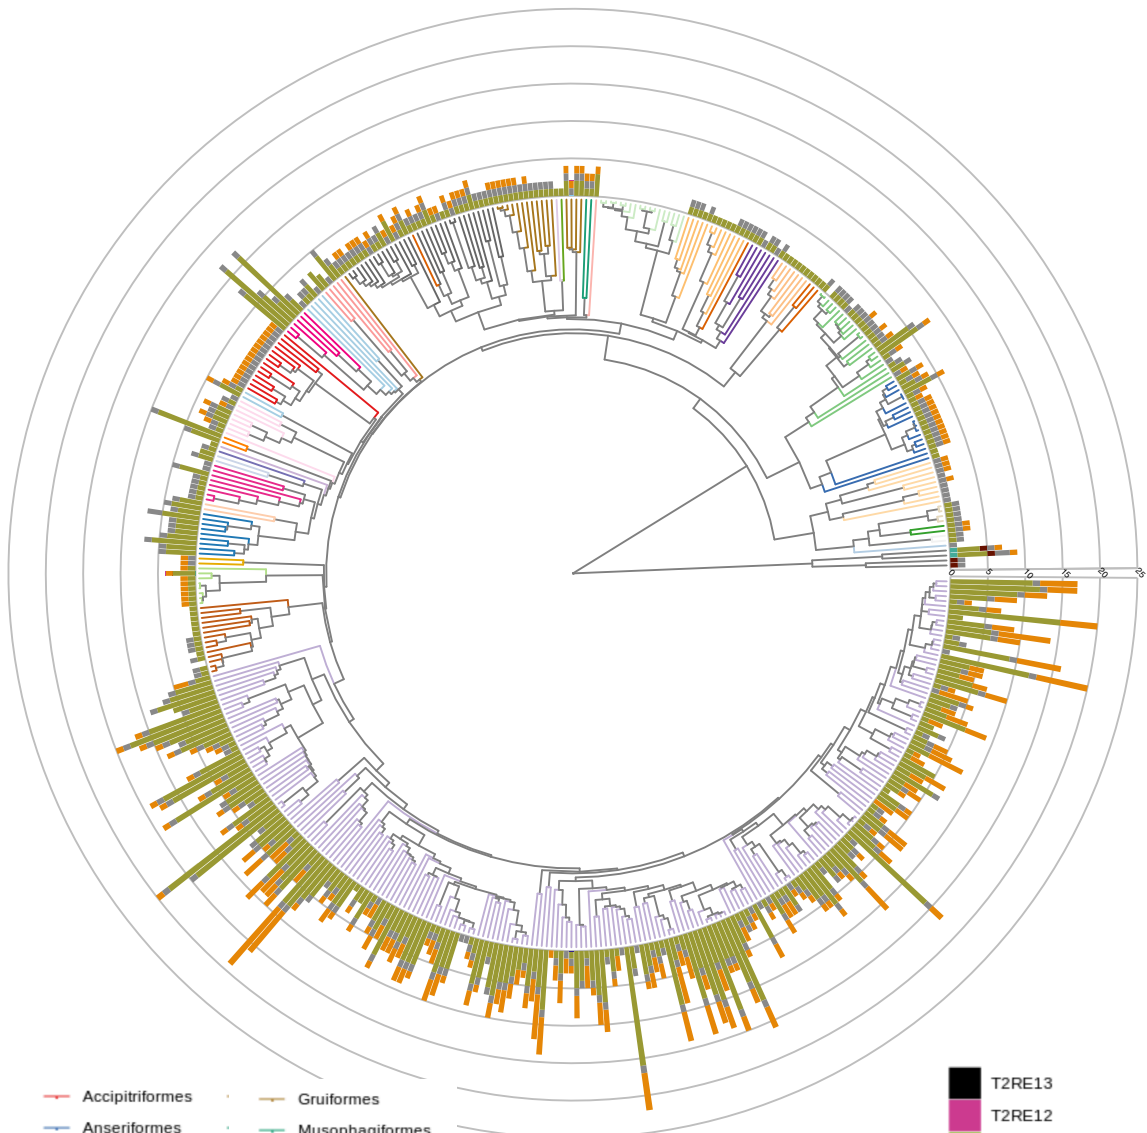

- Accipitriformes
- Anseriformes
- Apodiformes
- Apterygiformes
- Bucerotiformes
- Caprimulgiformes
- Cariamiformes
- Casuariiformes
- Charadriiformes
- Ciconiiformes
- Coliiformes
- Columbiformes
- Coraciiformes
- Cuculiformes
- Falconiformes
- Galbuliformes
- Galliformes
- Gruiformes
- Musophagiformes
- Opisthocomiformes
- Passeriformes
- Pelecaniformes
- Phoenicopteriformes
- Piciformes
- Podicipediformes
- Procellariiformes
- Psittaciformes
- Rheiformes
- Sphenisciformes
- Strigiformes
- Struthioniformes
- Tinamiformes
- Trogoniformes
- Upupiformes

- T2RE13
- T2RE12
- T2RE11
- T2RE10
- T2RE9
- T2RE8
- T2RE7
- T2RE6
- T2RE5
- T2RE4
- T2RE3
- T2RE2
- T2RE1
- T2RD
- T2RC
- T2RB
- T2RA

**Supplementary Fig. 37 | *T1R2* gene losses in mammals.** Examples of phylogenies and related contingency tables that we made to infer if the loss of *T1R2* was more likely to happen in carnivore branches of the tree. “*T1R2* intact” refers to the number of branches with an intact *T1R2* gene, while “*T1R2* loss” refers to the number of independent *T1R2* losses. In the first example, two carnivore species have lost their *T1R2* in two independent loss events. In the second example, two carnivore species lack *T1R2*, but there is only one gene loss event.

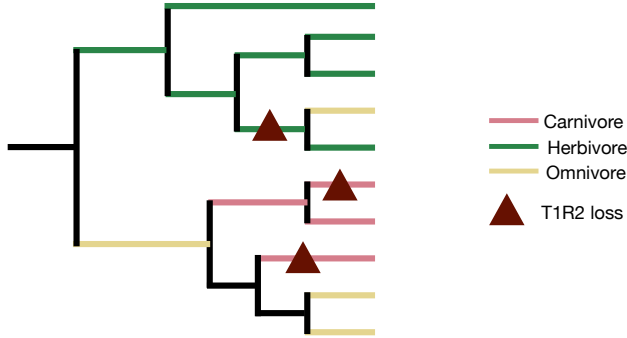

|           | T1R2 intact | T1R2 loss event |
|-----------|-------------|-----------------|
| Carnivore | 2           | 2               |
| Herbivore | 7           | 1               |
| Omnivore  | 4           | 0               |

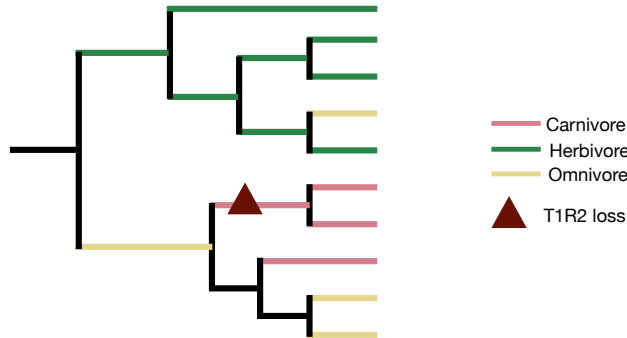

|           | T1R2 intact | T1R2 loss event |
|-----------|-------------|-----------------|
| Carnivore | 1           | 1               |
| Herbivore | 8           | 0               |
| Omnivore  | 4           | 0               |

**Supplementary Fig. 38 | Simulations of *TIR* gene losses in mammals.** Simulation results where *TIR* genes were randomly pseudogenized in the mammal tree, once without taking branch lengths into account for *TIR1* (a), *TIR2* (b), and *TIR3* (c), and once with draw probabilities weighted by branch lengths for *TIR1* (d), *TIR2* (e), and *TIR3* (f). We also show the simulations of *TIR2* loss without cetaceans and pinnipeds, without taking branch length into account (g) and when weighting draw probabilities by branch length (h). Histograms represent the results of the simulations (with the x-axis representing the number of randomly drawn branches) and the dashed lines representing the observed number of independent *TIR* loss per diet group. The *P*-values reported above each dashed line correspond to the number of simulations where the same number, or more, independent *TIR1*, *TIR2* or *TIR3* losses occurred than the observed number on corresponding branches divided by the total number of simulations (10,000). *TIR* genes categories of mammals as well as their diet preferences can be found in Supplementary Data 1. Source data are provided as a Source Data file.

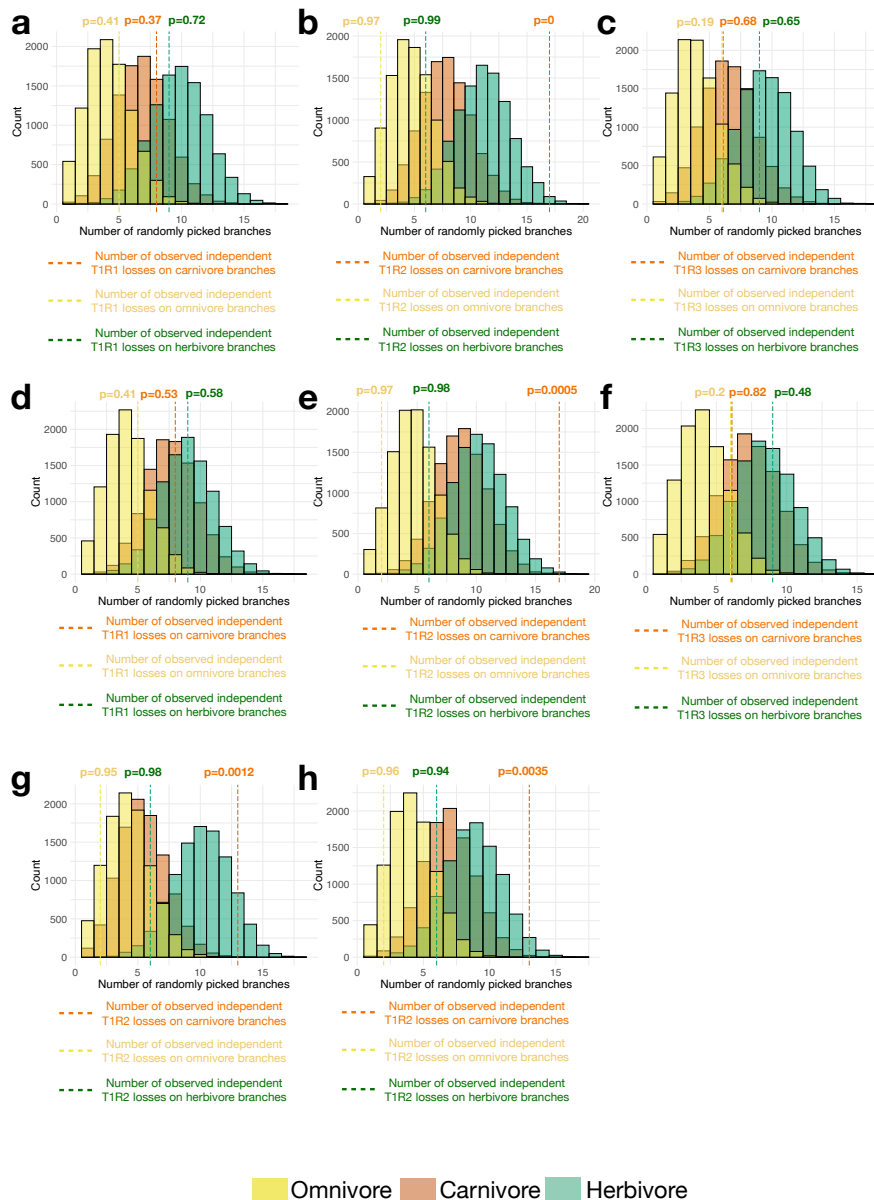



**Supplementary Fig. 39 | Natural selection analysis on sirenian *TIRI* genes.** PAML was used to compute the dN/dS ( $= \omega$ ) per branch under four different models. **a**, Model 1: Free-ratio model which fits one  $\omega$  ratio per branch. The mean  $\omega$  ratio of cetacean, pinniped and sirenian branches is indicated. **b**, Model 2: Two-ratio model with one  $\omega$  ratio for marine mammals (cetaceans, pinnipeds and sirenians) and one  $\omega$  ratio for closely related terrestrial mammals. **c**, Model 3: Two-ratio model with one  $\omega$  ratio for cetaceans and pinnipeds and one  $\omega$  for sirenians and terrestrial mammals. **d**, Model 4: Three-ratio model with one  $\omega$  ratio for cetaceans and pinnipeds, one  $\omega$  ratio for sirenians and one  $\omega$  ratio for terrestrial mammals. For the free-ratio model, the mean  $\omega$  ratio of cetaceans, pinnipeds and sirenians is indicated (0.61, 0.64 and 0.36, respectively). **e**, Log-likelihood (LnL) and number of parameters (np) of each model. The log-likelihood, as well as the  $\omega$  value found under a null model (one-ratio, assuming the same  $\omega$  for all the branches) is also indicated. **f**, Log-likelihood ratio test between model 4 and model 2 as well as between model 4 and model 3. The free-ratio model was the best model, with  $\omega$  values being lower in sirenian branches than in cetaceans and pinnipeds. The three-ratio model was significantly better than the two two-ratio models, indicating a lower negative selection on sirenian *TIRI* genes ( $\omega = 0.37$ ) compared to terrestrial mammals ( $\omega = 0.21$ ), but higher than in other aquatic mammals ( $\omega = 0.57$ ). **g**, RELAX results assigning terrestrial mammals as reference branches and either pinnipeds, cetaceans or sirenians as test branches. While RELAX found evidences of relaxed selection in pinnipeds and cetaceans ( $K < 1$ ,  $P$ -value  $< 0.5$ ), no evidence of relaxed or positive selection was retrieved in sirenians. Source data are provided as a Source Data file.

**a Model 1: Free-ratio**

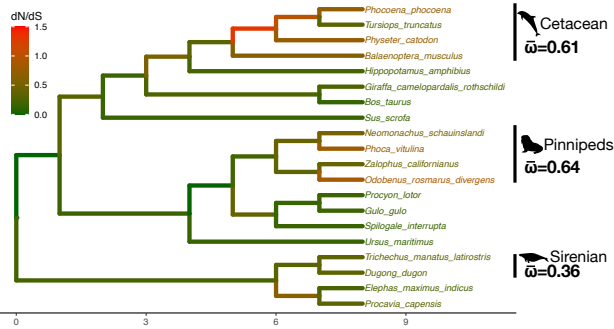

**b Model 2: Two-ratio Marine vs Terrestrial mammals**

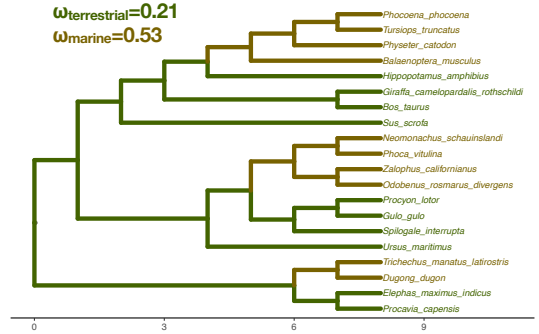

**c Model 3: Two-ratio Cetacean/Pinnipeds vs Sirenians/Terrestrial mammals**

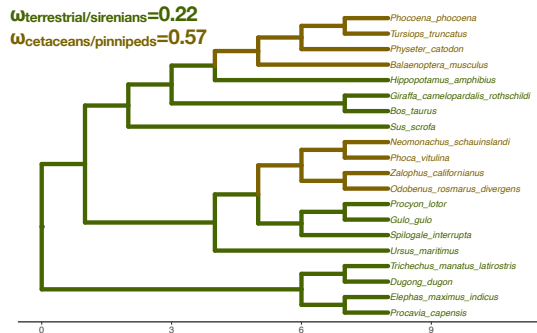

**d Model 4: Three-Ratio**

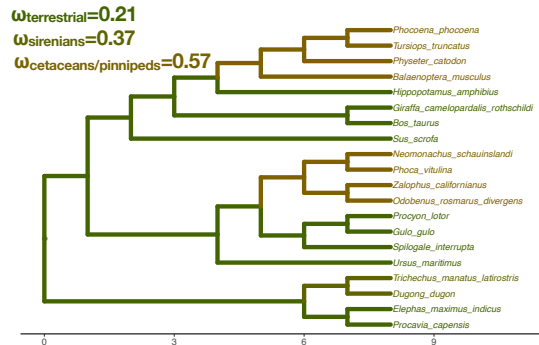

**e**

| Model               | np | Lnl          |
|---------------------|----|--------------|
| Model 1             | 77 | -16291.3943  |
| Model 4             | 42 | -16319.33553 |
| Model 2             | 41 | -16321.6407  |
| Model 3             | 41 | -16324.17046 |
| Null model (ω=0.27) | 40 | -16369.12442 |

**f**

| Models compared    | LRT  | df | p-value |
|--------------------|------|----|---------|
| Model 4 vs Model 2 | 4.61 | 1  | 0.032   |
| Model 4 vs Model 3 | 9.67 | 1  | 0.002   |

**g**

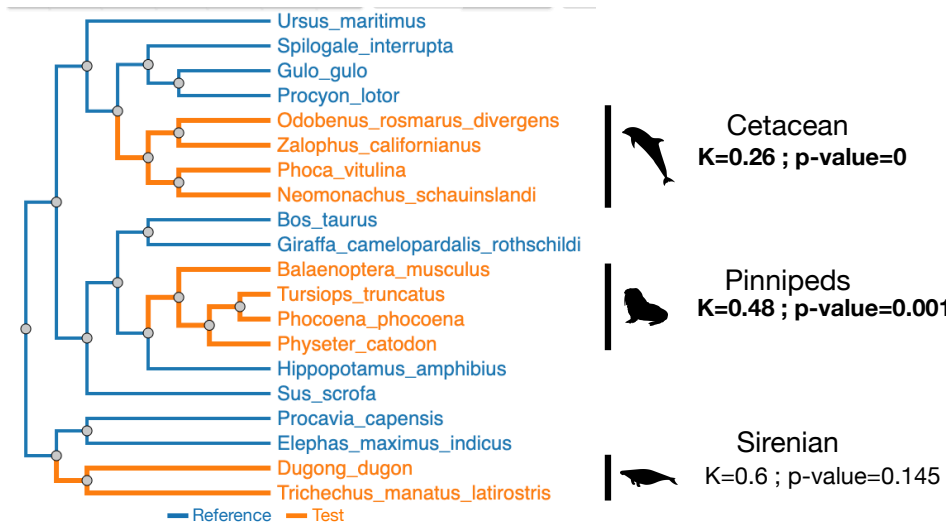

**Supplementary Fig. 40 | Natural selection analysis on sirenian T1R2 genes.** PAML was used to compute the dN/dS ( $= \omega$ ) per branch under four different models. **a**, Model 1: Free-ratio model which fits one  $\omega$  ratio per branch. The mean  $\omega$  ratio of cetacean, pinniped and sirenian branches is indicated. **b**, Model 2: Two-ratio model with one  $\omega$  ratio for marine mammals (cetaceans, pinnipeds and sirenians) and one  $\omega$  ratio for closely related terrestrial mammals. **c**, Model 3: Two-ratio model with one  $\omega$  ratio for cetaceans and pinnipeds and one  $\omega$  for sirenians and terrestrial mammals. **d**, Model 4: Three-ratio model with one  $\omega$  ratio for cetaceans and pinnipeds, one  $\omega$  ratio for sirenians and one  $\omega$  ratio for terrestrial mammals. For the free-ratio model, the mean  $\omega$  ratio of cetaceans, pinnipeds and sirenians is indicated (0.35, 0.41 and 0.18, respectively). **e**, Log-likelihood (LnL) and number of parameters (np) of each model. The log-likelihood, as well as the  $\omega$  value found under a null model (one-ratio, assuming the same  $\omega$  for all the branches) is also indicated. **f**, Log-likelihood ratio test between model 4 and model 2 as well as between model 4 and model 3. The free-ratio model was the best model, with  $\omega$  values being lower in sirenian branches than in cetaceans and pinnipeds. The three-ratio model was significantly better than model 2 but not significantly better than model 3. This indicates that the  $\omega$  ratio of sirenians ( $\omega=0.16$ ) is not significantly higher than the  $\omega$  ratio of terrestrial mammals ( $\omega=0.13$ ), but significantly lower than in other aquatic mammals ( $\omega=0.33$ ). **g**, RELAX results assigning terrestrial mammals as reference branches and either pinnipeds, cetaceans or sirenians as test branches. While RELAX found evidences of relaxed selection in pinnipeds and cetaceans ( $K < 1$ ,  $P$ -value  $< 0.5$ ), no evidence of relaxed or positive selection was retrieved in sirenians. Source data are provided as a Source Data file.

**a Model 1: Free-ratio**

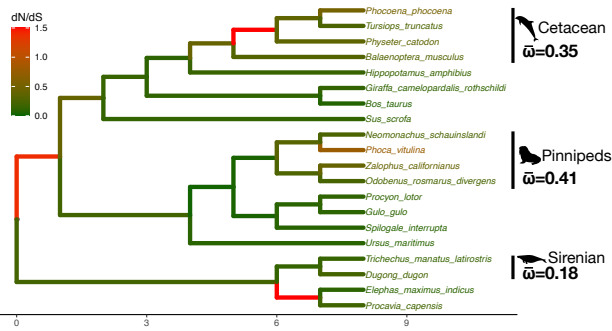

**b Model 2: Two-ratio Marine vs Terrestrial mammals**

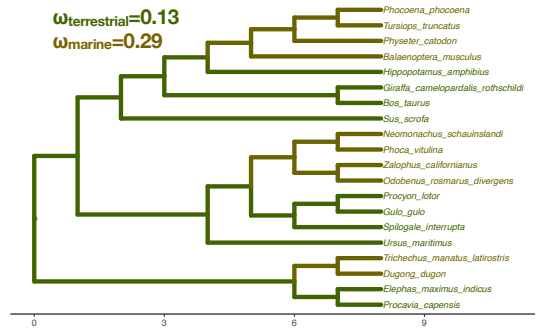

**c Model 3: Two-ratio Cetacean/Pinnipeds vs Sirenians/Terrestrial mammals**

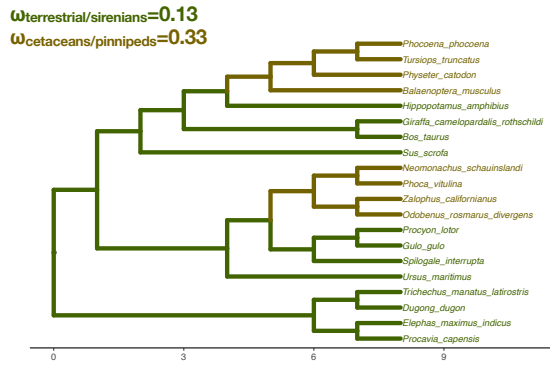

**d Model 4: Three-Ratio**

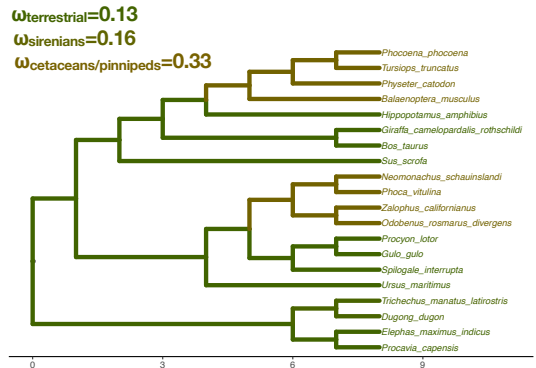

**e**

| Model                        | np | LnL          |
|------------------------------|----|--------------|
| Model 1                      | 77 | -16134.61384 |
| Model 4                      | 42 | -16187.15928 |
| Model 3                      | 41 | -16187.67518 |
| Model 2                      | 41 | -16193.66457 |
| Null model ( $\omega=0.17$ ) | 40 | -16232.39180 |

**f**

| Models compared    | LRT   | df | p-value |
|--------------------|-------|----|---------|
| Model 4 vs Model 2 | 13.01 | 1  | 0.0003  |
| Model 4 vs Model 3 | 1.03  | 1  | 0.31    |

**g**

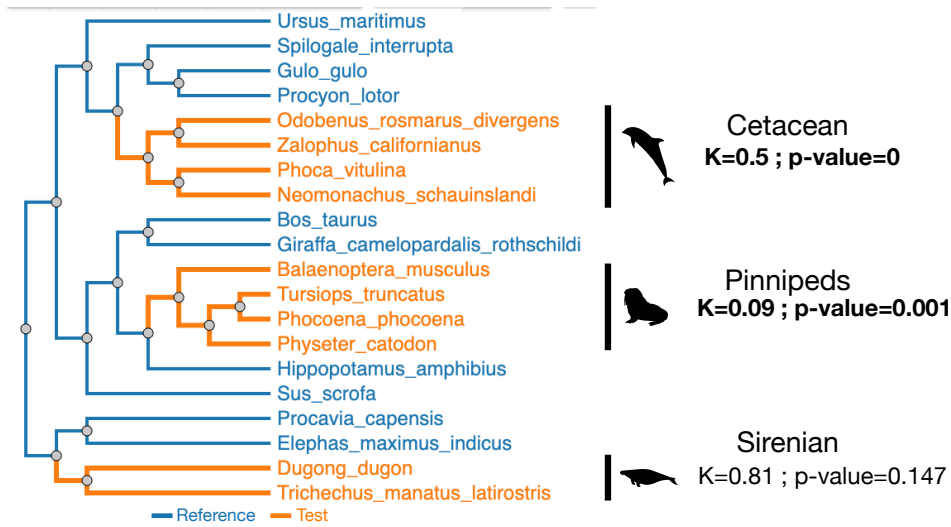

**Supplementary Fig. 41 | Natural selection analysis on sirenian *TIR3* genes.** PAML was used to compute the dN/dS ( $= \omega$ ) per branch under four different models. **a**, Model 1: Free-ratio model which fits one  $\omega$  ratio per branch. The mean  $\omega$  ratio of cetacean, pinniped and sirenian branches is indicated. **b**, Model 2: Two-ratio model with one  $\omega$  ratio for marine mammals (cetaceans, pinnipeds and sirenians) and one  $\omega$  ratio for closely related terrestrial mammals. **c**, Model 3: Two-ratio model with one  $\omega$  ratio for cetaceans and pinnipeds and one  $\omega$  for sirenians and terrestrial mammals. **d**, Model 4: Three-ratio model with one  $\omega$  ratio for cetaceans and pinnipeds, one  $\omega$  ratio for sirenians and one  $\omega$  ratio for terrestrial mammals. For the free-ratio model, the mean  $\omega$  ratio of cetaceans, pinnipeds and sirenians is indicated (0.47, 0.42 and 0.22, respectively). **e**, Log-likelihood (LnL) and number of parameters (np) of each model. The log-likelihood, as well as the  $\omega$  value found under a null model (one-ratio, assuming the same  $\omega$  for all the branches) is also indicated. **f**, Log-likelihood ratio test between model 4 and model 2 as well as between model 4 and model 3. The free-ratio model was the best model, with  $\omega$  values being lower in sirenian branches than in cetaceans and pinnipeds. The three-ratio model was significantly better than model 3 but not significantly better than model 2. This indicates that the  $\omega$  ratio of sirenians ( $\omega=0.31$ ) is not significantly lower than the  $\omega$  ratio of aquatic mammals ( $\omega=0.38$ ), but significantly higher than in terrestrial mammals ( $\omega=0.15$ ). **g**, RELAX results assigning terrestrial mammals as reference branches and either pinnipeds, cetaceans or sirenians as test branches. While RELAX found evidences of relaxed selection in pinnipeds and cetaceans ( $K < 1$ ,  $P$ -value  $< 0.5$ ), no evidence of relaxed or positive selection was retrieved in sirenians. Source data are provided as a Source Data file.

**a Model 1: Free-ratio**

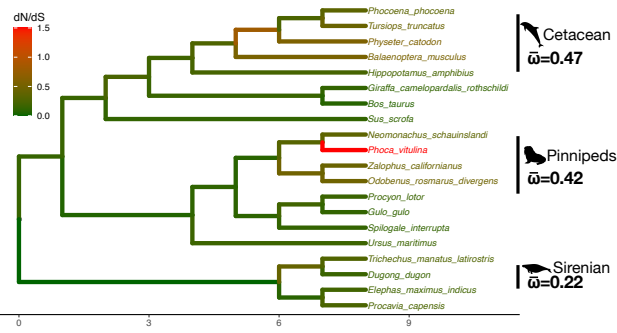

**b Model 2: Two-ratio Marine vs Terrestrial mammals**

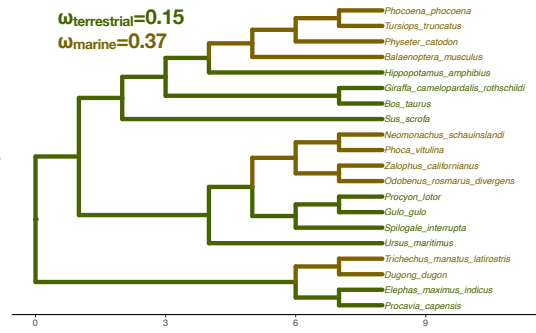

**c Model 3: Two-ratio Cetacean/Pinnipeds vs Sirenians/Terrestrial mammals**

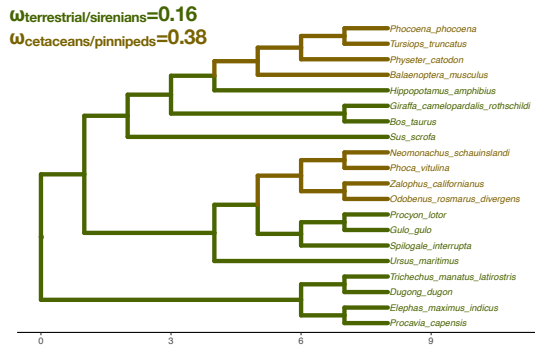

**d Model 4: Three-Ratio**

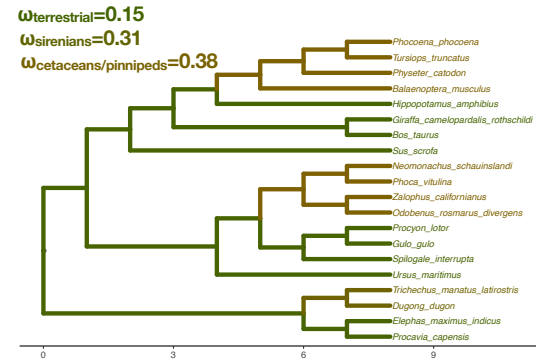

**e**

| Model                        | np | Lnl          |
|------------------------------|----|--------------|
| Model 1                      | 77 | -20196.35761 |
| Model 4                      | 42 | -20234.44752 |
| Model 2                      | 41 | -20235.11004 |
| Model 3                      | 41 | -20242.62811 |
| Null model ( $\omega=0.21$ ) | 40 | -20293.35398 |

**f**

| Models compared    | LRT   | df | p-value |
|--------------------|-------|----|---------|
| Model 4 vs Model 2 | 1.325 | 1  | 0.25    |
| Model 4 vs Model 3 | 16.36 | 1  | 5.2e-5  |

**g**

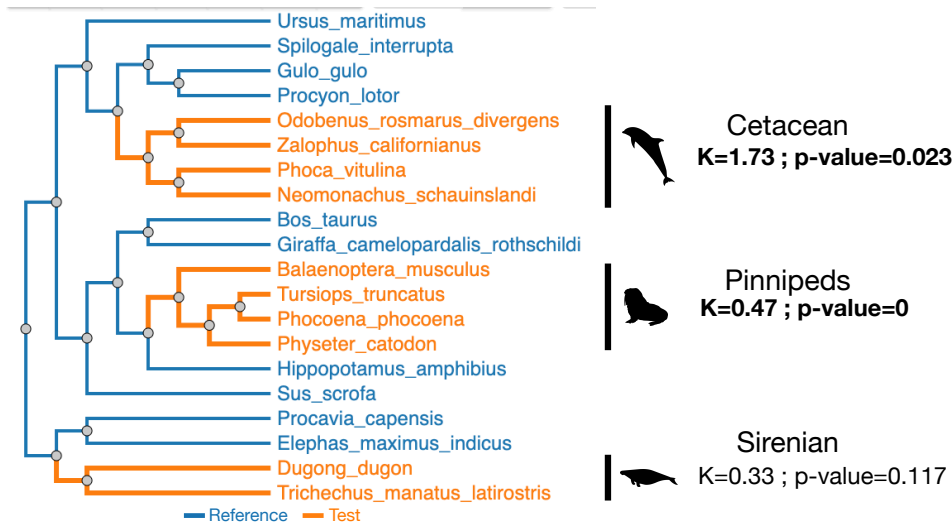

**Supplementary Fig. 42 | Vertebrate *T2R* gene tree.** **a**, Near maximum likelihood phylogeny of *T2R* genes of vertebrates with branches colored according to the vertebrate (sub)class. **b**, Clade tree generated from (a) with local support values indicated at each node (according to a Shimodaira-Hasegawa test). For *T2R* genes, we completely redefined the nomenclature, as no proper gene topology with representative vertebrate species are available as of yet. The tree in newick version, as well as all sequences and the alignment file can be found in FigShare. Sub-trees of each vertebrate (sub)class with the number of *T2R* genes are shown in Supplementary Fig. 36. Maximum likelihood phylogeny of *T2R* genes extracted from one species per vertebrate (sub)class is shown in Supplementary Figs. 43-44.

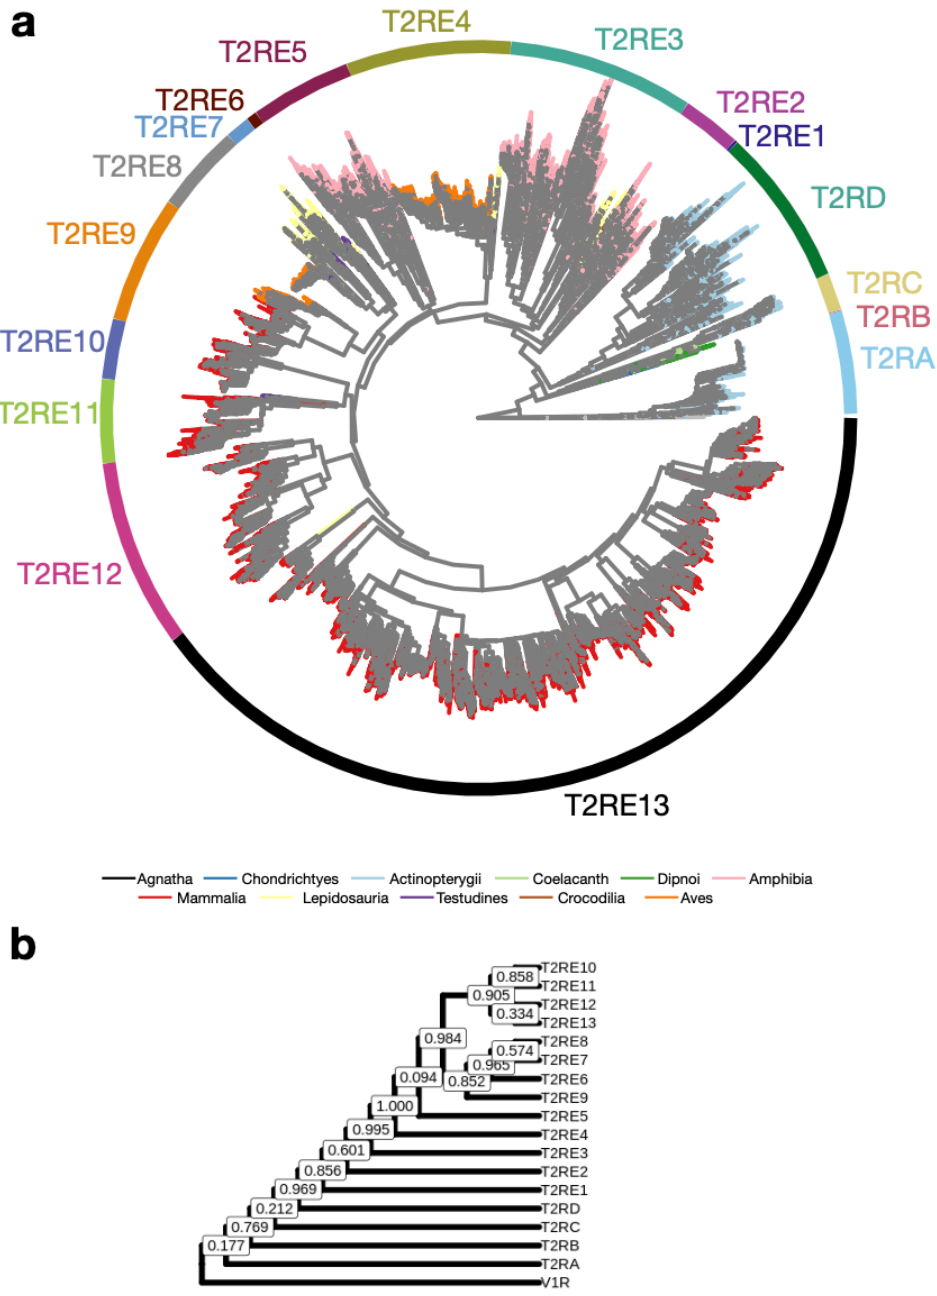

**Supplementary Fig. 43 | Maximum likelihood phylogeny of *T2R* genes.** Maximum likelihood phylogeny of *T2R* genes extracted from one representative species per vertebrate subclass. Branches are colored according to the vertebrate (sub)class. *T2R* subclades are indicated (*T2RB* is directly indicated at the tip of the corresponding branch as there was only one sequence in this clade). The tree was computed using the optimal model found by ModelFinder (JTT+F+R7). The robustness of the nodes was evaluated with 1,000 ultrafast bootstraps and these bootstrap values are reported for each node on Supplementary Fig. 44. All the clades retrieved using the near-ML method were retrieved as monophyletic, and the exact same topology was retrieved.

## T2R

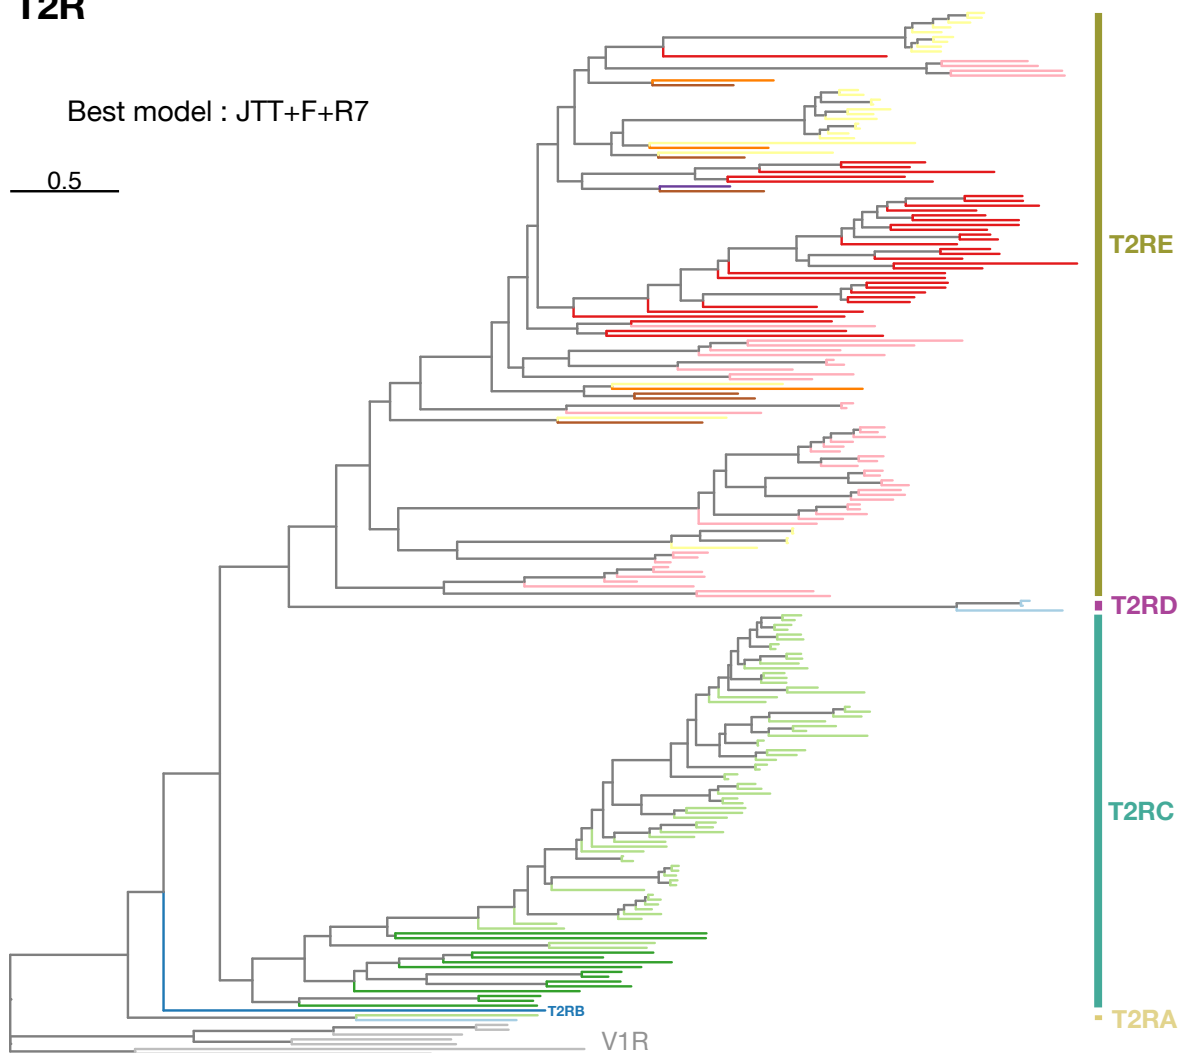

- |                                |                              |                              |
|--------------------------------|------------------------------|------------------------------|
| — <i>Petromyzon marinus</i>    | — <i>Callorhinchus milii</i> | — <i>Danio rerio</i>         |
| — <i>Protopterus annectens</i> | — <i>Xenopus tropicalis</i>  | — <i>Lacerta viridis</i>     |
| — <i>Chelonia mydas</i>        | — <i>Gallus gallus</i>       | — <i>Alligator sinensis</i>  |
|                                |                              | — <i>Mus musculus</i>        |
|                                |                              | — <i>Latimeria chalumnae</i> |



**Supplementary Fig. 44 | Maximum likelihood phylogeny of *T2R* genes.** Same maximum likelihood phylogeny of *T2R* genes as in Supplementary Fig. 43 but with bootstrap values indicated at each node.

**T2R**

Best model : JTT+F+R7

0.5

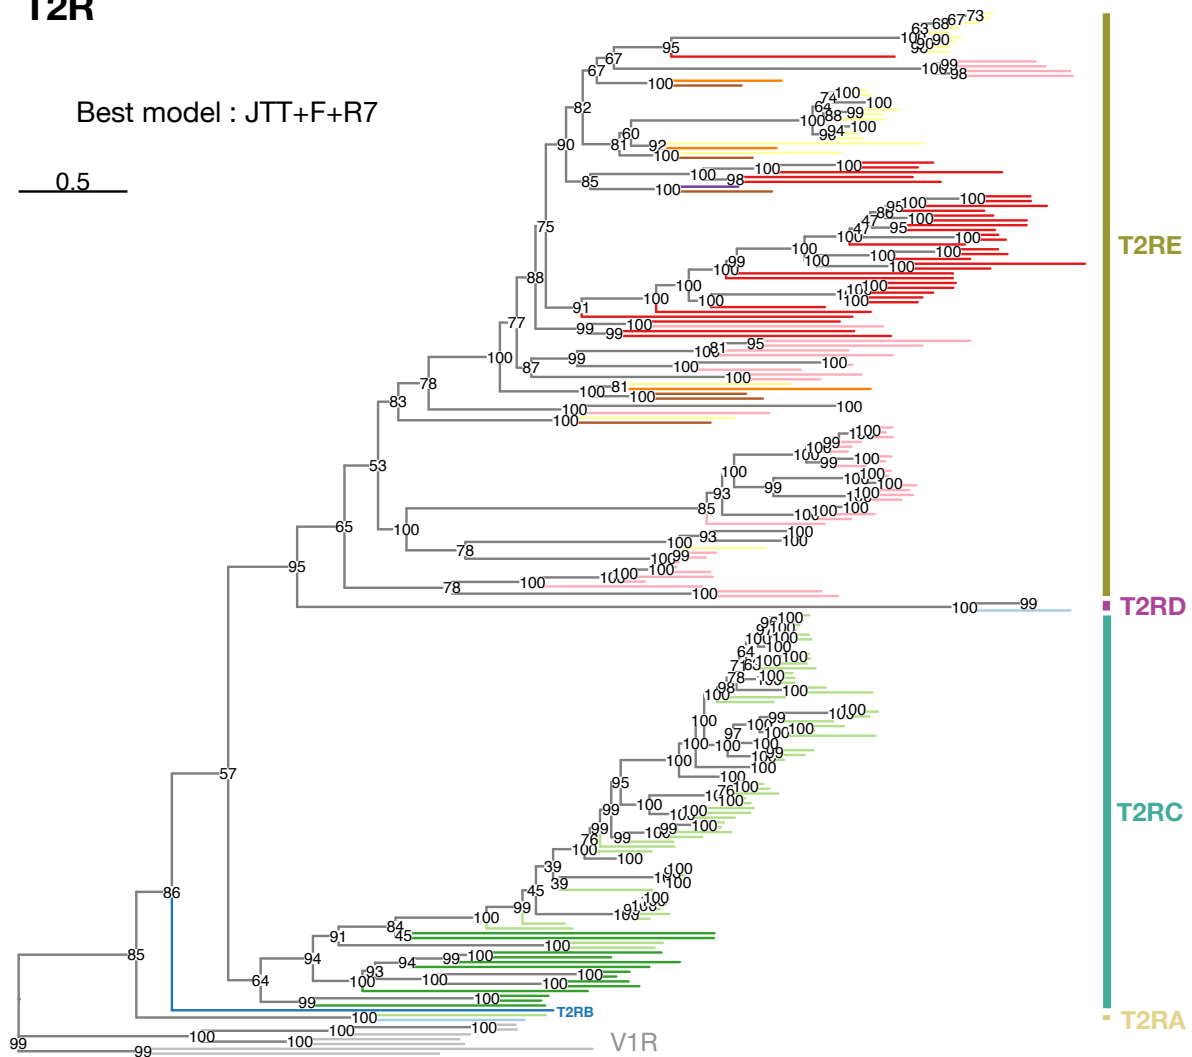

- *Petromyzon marinus*    — *Callorhinchus milii*    — *Danio rerio*
- *Protopterus annectens*    — *Xenopus tropicalis*    — *Lacerta viridis*    — *Mus musculus*
- *Chelonia mydas*    — *Gallus gallus*    — *Alligator sinensis*    — *Latimeria chalumnae*

**Supplementary Fig. 45 | Association between the number of *T2R* genes and diet preferences in vertebrates.** Diet preferences were retrieved for every species from various databases (see Methods). To examine if the *T2R* gene repertoire was shaped by diet preferences in mammals, birds and ray-finned fishes, we performed two-sided pGLS analyses between the number of complete *T2R* genes and the diet. pGLS *P*-values are indicated above each boxplot (first quartile - 1.5; the interquartile range, the first quartile, the mean, the third quartile and the third quartile + 1.5 interquartile range. Dots represent outliers) and each test were performed twice, taking BUSCO80 (left) or BUSCO90 (right) species. For mammals, we further tested the impact of the two carnivore marine clades on the pGLS results. Note that when considering only chromosome-scale assemblies, the pGLS stayed significant in mammals (pGLS *P*-value=0.024) and non-significant in ray-finned fishes and birds (*P*-value=0.37 and *P*-value=0.26 respectively). Source data are provided as a Source Data file.

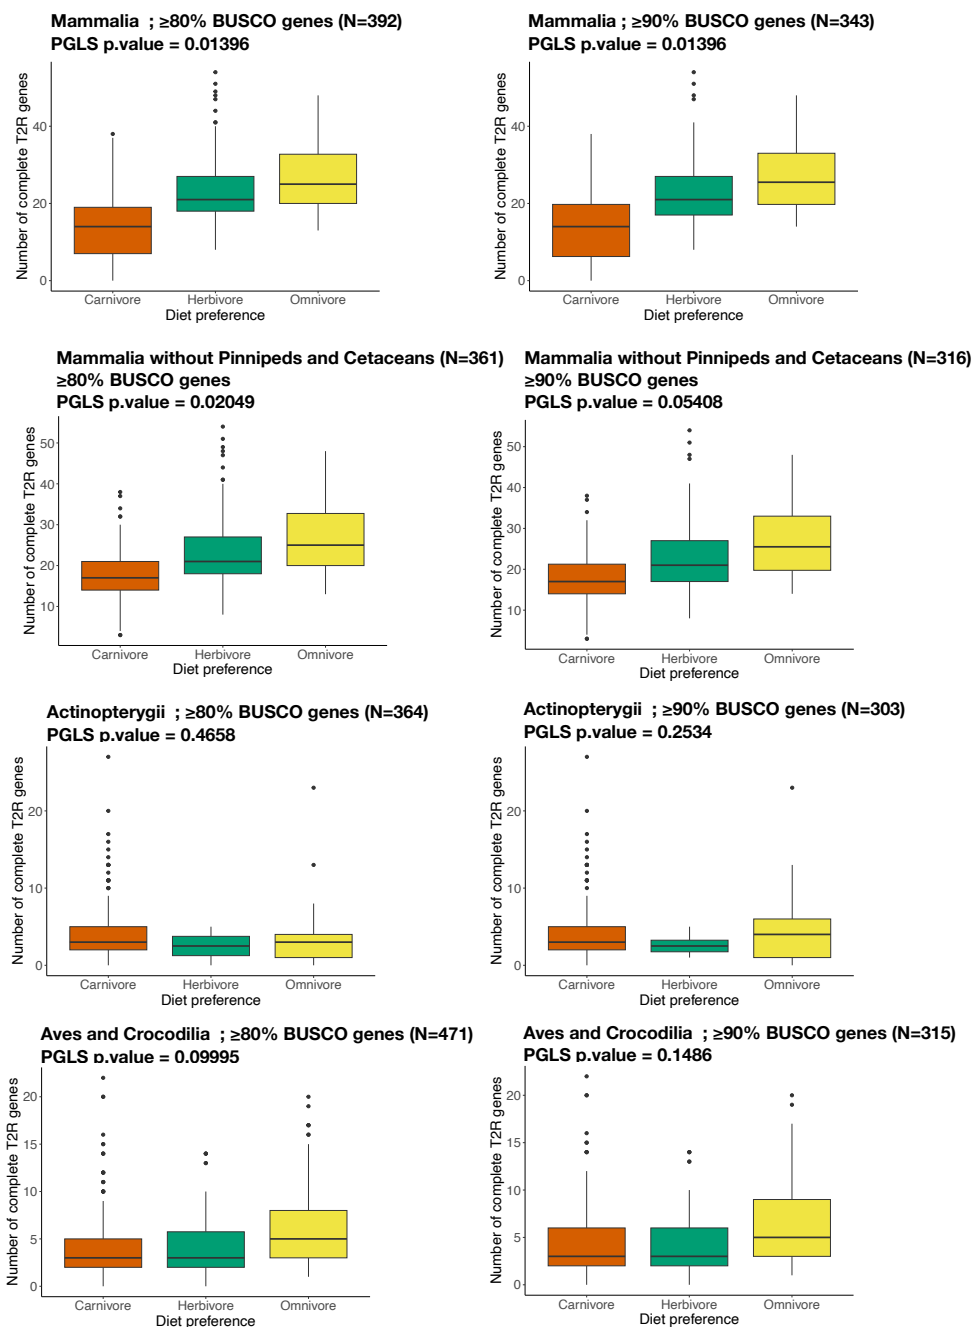

**Supplementary Fig. 46 | Significant results from pGLS analysis comparing complete chemoreceptor gene numbers and ecological parameters. a, mammals; b, birds; c, ray-finned fishes.** Due to the stringency of pGLS analysis combined with the high number of tests (increasing the chances to find false positives), we only considered as significant pGLS results with a  $P_{\text{PGLS}} < 0.01$ , and only pGLS results meeting this criterion are shown for mammals, ray-finned fishes and birds. Results were consistent between the BUSCO80 and BUSCO90 datasets, except for the pGLS between the number of complete *OR* genes and the primary lifestyle of birds, which was not significant with the BUSCO90 dataset ( $p\text{-value} = 0.07$ ) but significant with the BUSCO80 dataset ( $P\text{-value} = 2e-3$ ). The pGLS between the number of complete *TIR* genes and the primary aquatic habitat of ray-finned fishes was still significant after removing the only species (*Albula glossodonta*) in the “brack” category (BUSCO80  $P_{\text{PGLS}} = 2.149e-3$ ; BUSCO90  $P_{\text{PGLS}} = 4.252e-3$ ). The figure also show that results are consistent when taking only chromosome-scale assemblies, except between the number of *OR* genes and the habitat of birds ( $P_{\text{PGLS}} = 0.15$ , not shown) and between the number of *OR* genes and the migratory behavior of birds ( $P_{\text{PGLS}} = 0.12$ , not shown). Aquatic habitat in ray-finned fishes is coded as B...brackisch, F...freshwater, M...marine (allowing for combinations); migratory behavior in birds is coded as S...sedentary, P...partially migratory, M...migratory; habitat in mammals is encoded according to their ForStrat.Value as M...marine, G...ground level including aquatic foraging, S...scansorial, Ar...arboreal, A...aerial (see Supplementary Data 1). Box-plos represent the first quartile - 1.5; the interquartile range, the first quartile, the mean, the third quartile and the third quartile + 1.5 interquartile range. Dots represent outliers. Source data are provided as a Source Data file.

### a - Mammals

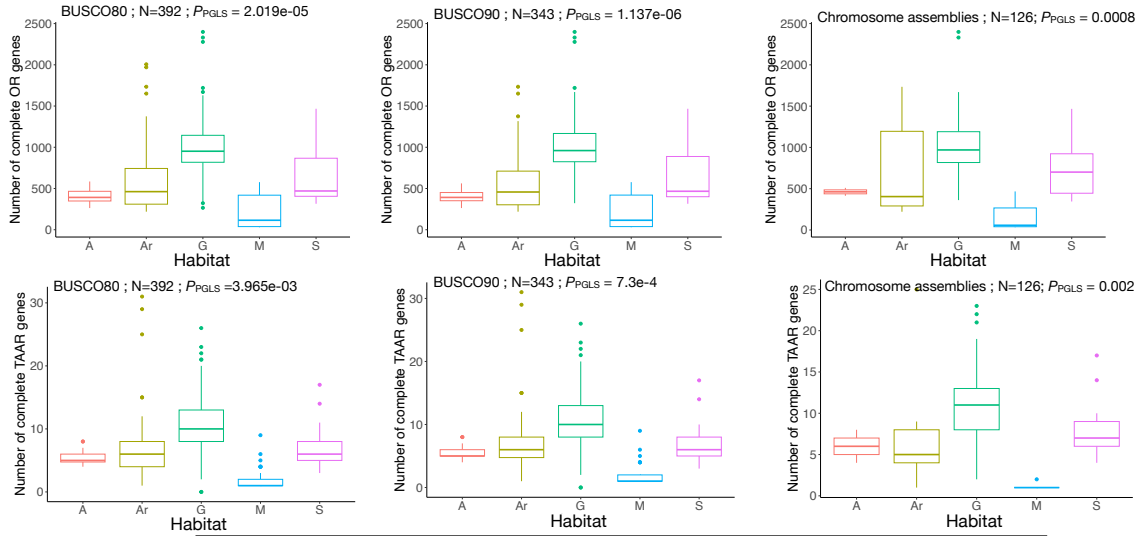

### b - Birds

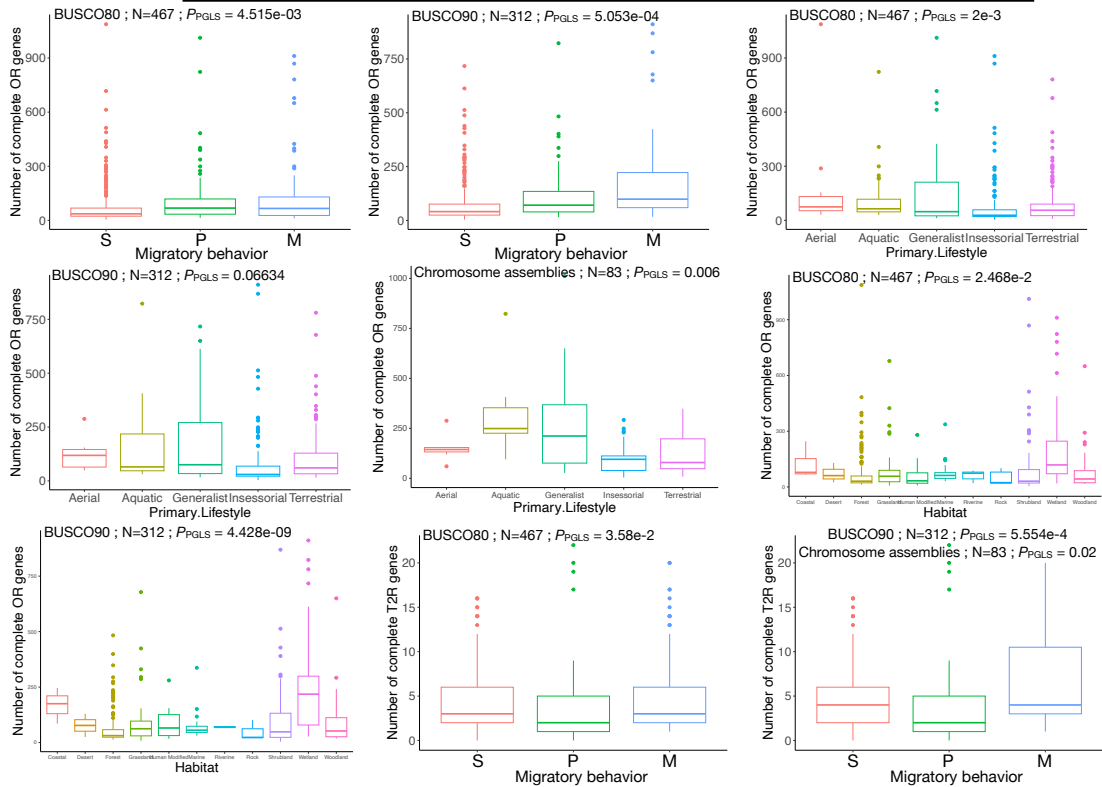

### c - Ray-finned fishes

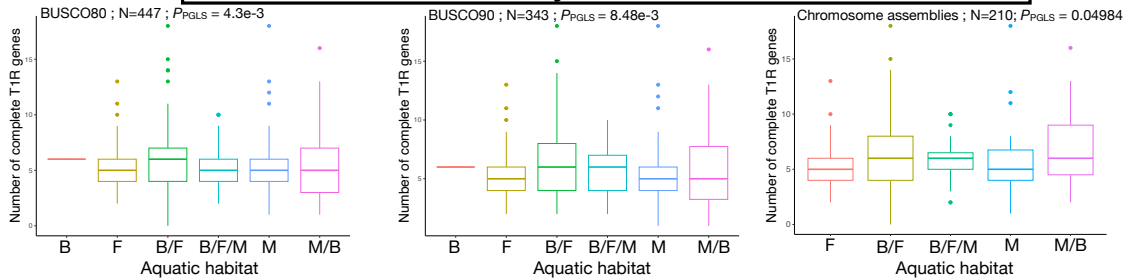

**Supplementary Fig. 47 | Selection test for *OR* genes in five cetacean species.** Unrooted species tree used for dN/dS ( $= \omega$  ratio) analysis as well as the different models tested. Model 5 allowing a different  $\omega$  ratio per branch is not shown as it was never significantly better than the other models. The brown branches correspond to terrestrial species outgroups (*Sus scrofa* and *Hippopotamus amphibius*) and the blue branch corresponds to the cetacean species tested: *Tursiops truncatus* (**a**), *Orcinus orca* (**d**), *Monodon monoceros* (**g**), *Physeter catodon* (**j**), *Megaptera novaeangliae* (**m**). The number and proportion of *OR* genes supported by each model is shown as pie chart for *Tursiops truncatus* (**b**), *Orcinus orca* (**e**), *Monodon monoceros* (**h**), *Physeter catodon* (**k**), *Megaptera novaeangliae* (**n**). For each *OR* gene best supported by model 2, a bar plot shows the  $\omega$  ratio of the terrestrial branches (brown,  $\omega_1 = \omega_2$ ) and the  $\omega$  ratio of the cetacean species (blue,  $\omega_3$ ): *Tursiops truncatus* (**c**), *Orcinus orca* (**f**), *Monodon monoceros* (**i**), *Physeter catodon* (**l**), *Megaptera novaeangliae* (**o**). The number of *OR* genes best supported by model 2 and showing accelerated ( $(\omega_1 = \omega_2) < \omega_3$ ) or decelerated evolution ( $(\omega_1 = \omega_2) > \omega_3$ ) is reported at the top of the bar plots, their percentage relative to the total number of *OR* genes is provided in parentheses. Source data are provided as a Source Data file.

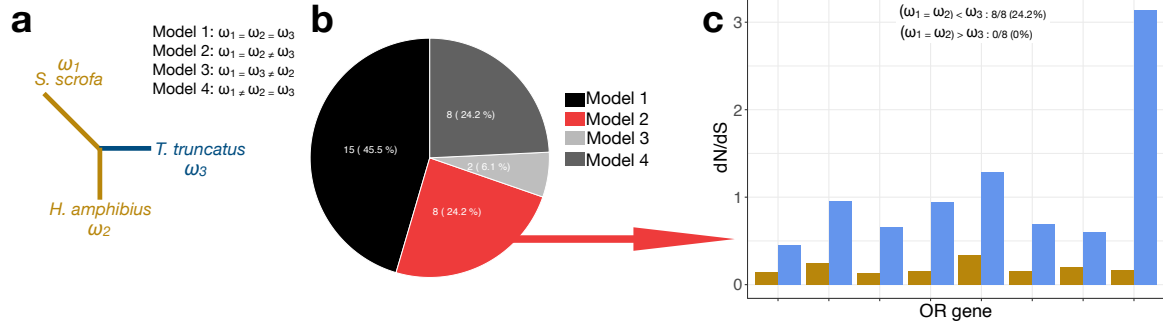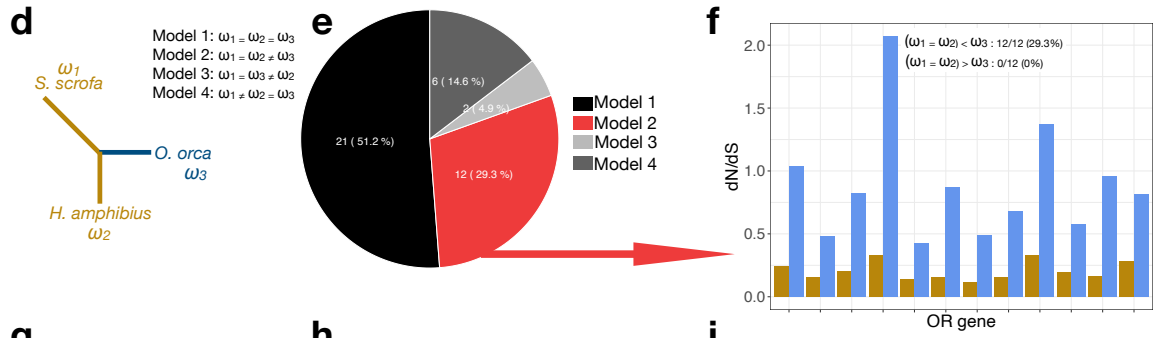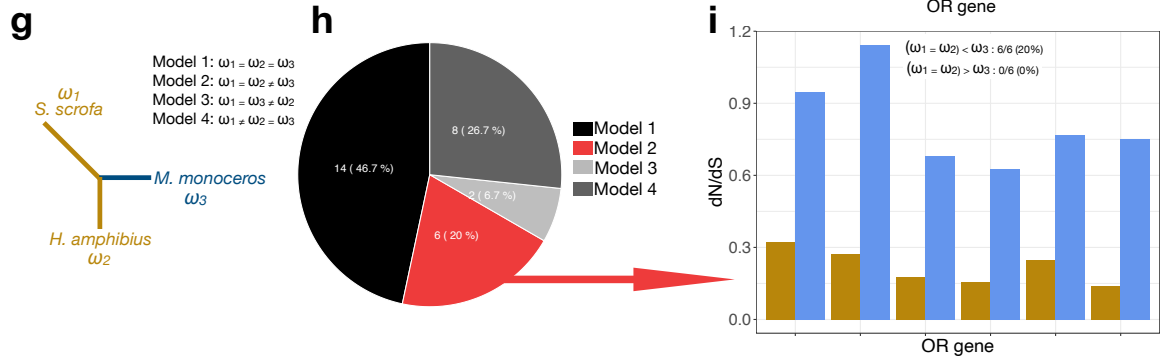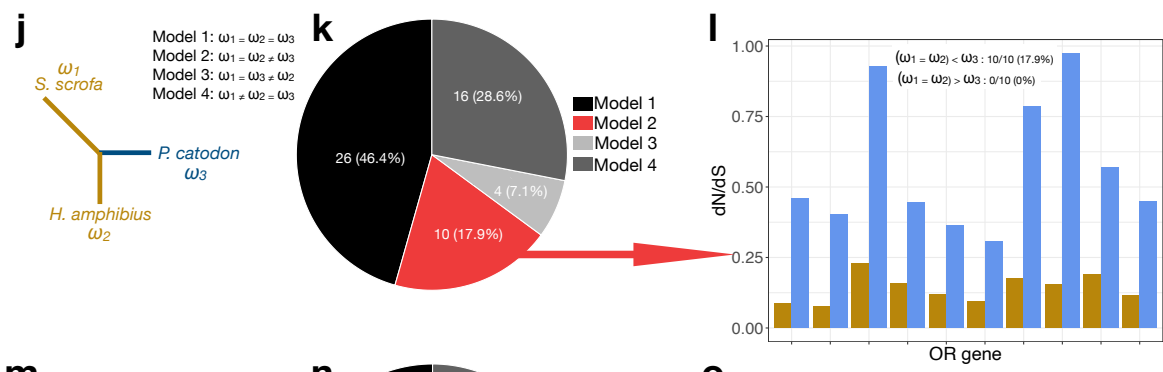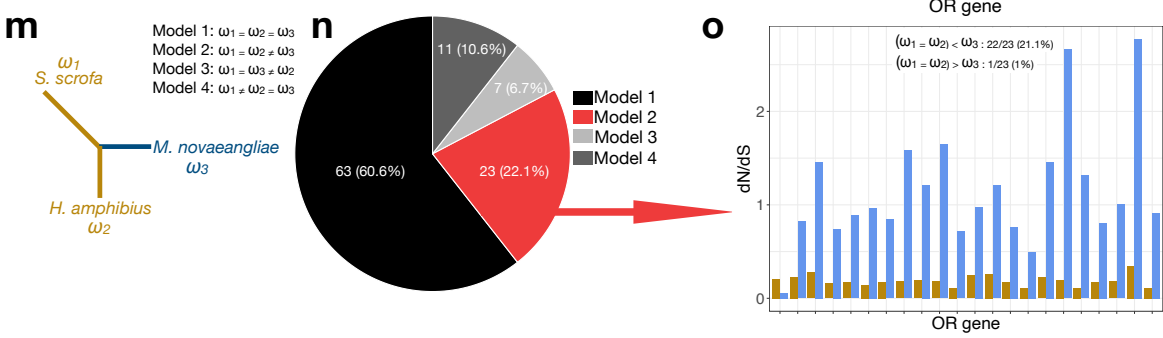

**Supplementary Fig. 48 | Selection test for *OR* genes in four pinnipeds.** Unrooted species tree used for dN/dS (=  $\omega$  ratio) analysis as well as the different models tested. Model 5 allowing a different  $\omega$  ratio per branch is not shown as it was never significantly better than the other models. The brown branches correspond to terrestrial species outgroups (*Ursus arctos* and *Spilogale interrupta*) and the blue branch corresponds to the pinnipeds tested: *Mirounga angustirostris* (a), *Phoca vitulina* (d), *Zalophus californianus* (g), *Odobenus rosmarus divergens* (j). The number and proportion of *OR* genes supported by each model is shown as pie chart for *Mirounga angustirostris* (b), *Phoca vitulina* (e), *Zalophus californianus* (h), *Odobenus rosmarus divergens* (k). For each *OR* gene best supported by model 2, a bar plot shows the  $\omega$  ratio of the terrestrial branches (brown,  $\omega_1 = \omega_2$ ) and the  $\omega$  ratio of the pinnipeds species (blue,  $\omega_3$ ): *Mirounga angustirostris* (c), *Phoca vitulina* (f), *Zalophus californianus* (i), *Odobenus rosmarus divergens* (l). The number of *OR* genes best supported by model 2 and showing accelerated (( $\omega_1 = \omega_2$ ) <  $\omega_3$ ) or decelerated evolution (( $\omega_1 = \omega_2$ ) >  $\omega_3$ ) is reported at the top of the bar plots, their percentage relative to the total number of *OR* genes is provided in parentheses. Source data are provided as a Source Data file.

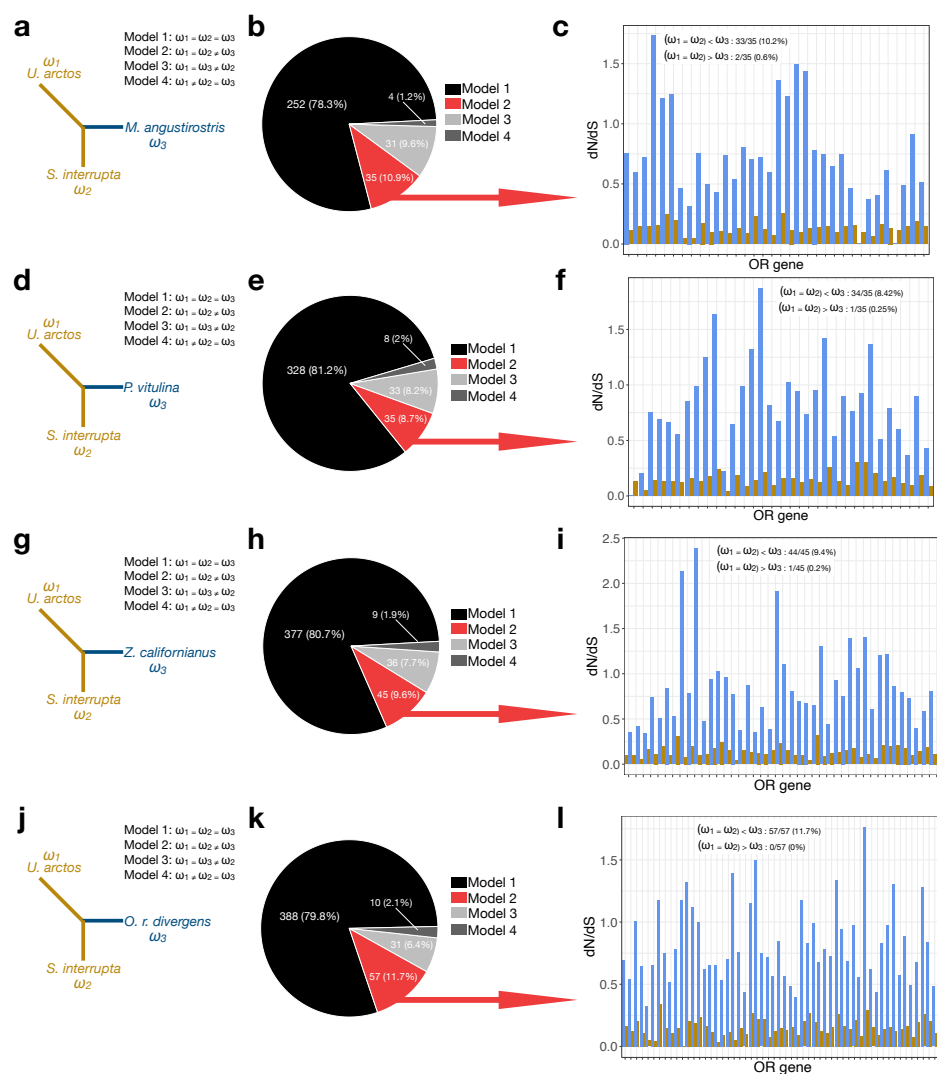

**Supplementary Fig. 49 | Selection test for *OR* genes in two sirenian species.** Unrooted species tree used for dN/dS (=  $\omega$  ratio) analysis as well as the different models tested. Model 5 allowing a different  $\omega$  ratio per branch is not shown as it was never significantly better than the other models. The brown branches correspond to terrestrial species outgroups (*Chrysochloris asiatica* and *Procavia capensis*) and the blue branch corresponds to the sirenian species tested: *Dugong dugon* (a), *Trichechus manatus latirostris* (d). The number and proportion of *OR* genes supported by each model is shown as pie chart for *Dugong dugon* (b), *Trichechus manatus latirostris* (e). For each *OR* gene best supported by model 2, a bar plot shows the  $\omega$  ratio of the terrestrial branches (brown,  $\omega_1 = \omega_2$ ) and the  $\omega$  ratio of the sirenian species (blue,  $\omega_3$ ): *Dugong dugon* (c), *Trichechus manatus latirostris* (f). The number of *OR* genes best supported by model 2 and showing accelerated ( $(\omega_1 = \omega_2) < \omega_3$ ) or decelerated evolution ( $(\omega_1 = \omega_2) > \omega_3$ ) is reported at the top of the bar plots, their percentage relative to the total number of *OR* genes is provided in parentheses. Source data are provided as a Source Data file.

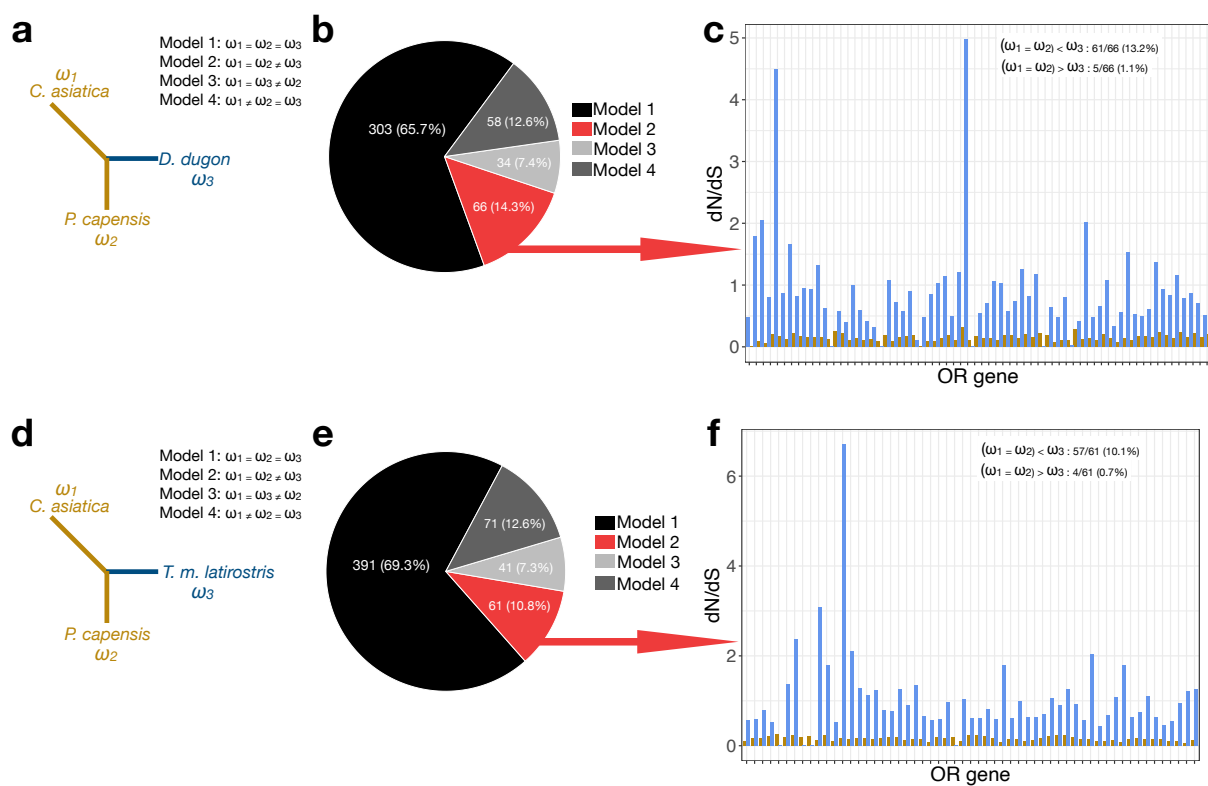



**Supplementary Fig. 50 | Selection test for *OR* genes in four *sphenisciformes*.** Unrooted species tree used for dN/dS ( $= \omega$  ratio) analysis as well as the different models tested. Model 5 allowing a different  $\omega$  ratio per branch is not shown as it was never significantly better than the other models. The brown branches correspond to terrestrial species outgroups (*Theristicus caerulescens* and *Nycticorax nycticorax*) and the blue branch corresponds to the *sphenisciformes* tested: *Pygoscelis adeliae* (**a**), *Eudyptula minor* (**d**), *Megadyptes antipodes antipodes* (**g**), *Eudyptes robustus* (**j**). The number and proportion of *OR* genes supported by each model is shown as pie chart for *Pygoscelis adeliae* (**b**), *Eudyptula minor* (**e**), *Megadyptes antipodes antipodes* (**h**), *Eudyptes robustus* (**k**). For each *OR* gene best supported by model 2, a bar plot shows the  $\omega$  ratio of the terrestrial branches (brown,  $\omega_1 = \omega_2$ ) and the  $\omega$  ratio of the *sphenisciformes* species (blue,  $\omega_3$ ): *Pygoscelis adeliae* (**c**), *Eudyptula minor* (**f**), *Megadyptes antipodes antipodes* (**i**), *Eudyptes robustus* (**l**). The number of *OR* genes best supported by model 2 and showing accelerated ( $(\omega_1 = \omega_2) < \omega_3$ ) or decelerated evolution ( $(\omega_1 = \omega_2) > \omega_3$ ) is reported at the top of the bar plots, their percentage relative to the total number of *OR* genes is provided in parentheses. Source data are provided as a Source Data file.

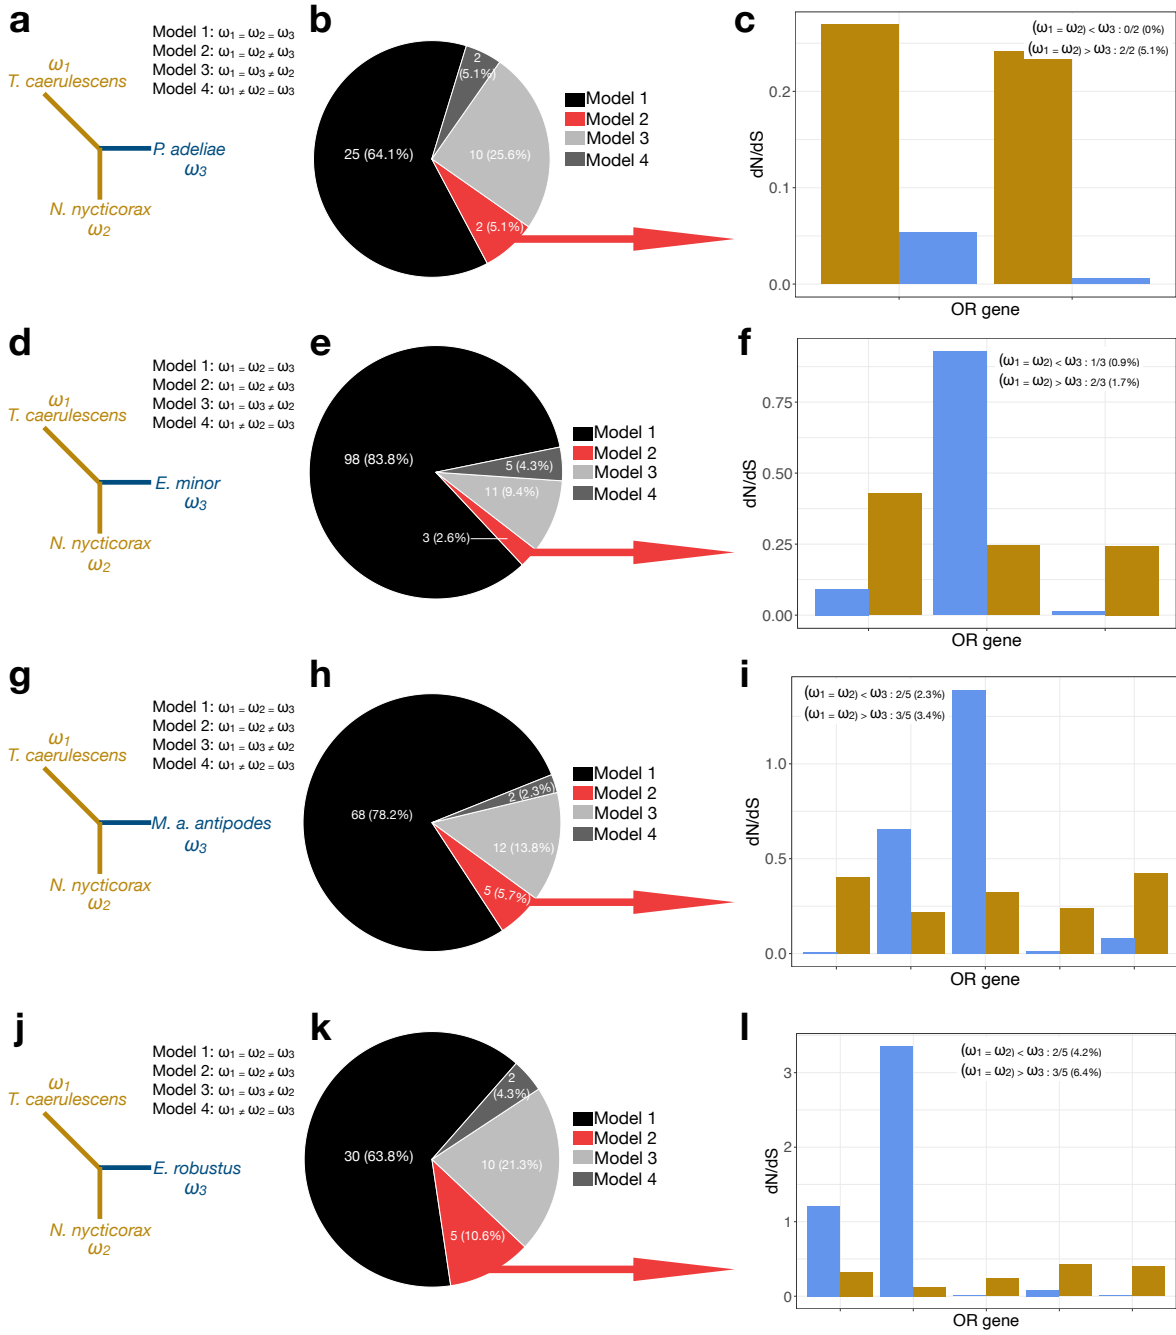

**Supplementary Fig. 51 | Selection test for OR genes in three marine snakes.** Unrooted species tree used for dN/dS (=  $\omega$  ratio) analysis as well as the different models tested. Model 5 allowing a different  $\omega$  ratio per branch is not shown as it was never significantly better than the other models. The brown branches correspond to terrestrial species outgroups (*Notechis scutatus* or *Pseudonaja textilis* and *Pseudonaja textilis* or *Bungarus multicinctus*) and the blue branch corresponds to the marine snake tested: *Hydrophis cyanocinctus* (a), *Hydrophis curtus* (d), *Laticauda colubrina* (g). The number and proportion of OR genes supported by each model is shown as pie chart for *Hydrophis cyanocinctus* (b), *Hydrophis curtus* (e), *Laticauda colubrina* (h). For each OR gene best supported by model 2, a bar plot shows the  $\omega$  ratio of the terrestrial branches (brown,  $\omega_1 = \omega_2$ ) and the  $\omega$  ratio of the marine snake species (blue,  $\omega_3$ ): *Hydrophis cyanocinctus* (c), *Hydrophis curtus* (f), *Laticauda colubrina* (i). The number of OR genes best supported by model 2 and showing accelerated (( $\omega_1 = \omega_2$ ) <  $\omega_3$ ) or decelerated evolution (( $\omega_1 = \omega_2$ ) >  $\omega_3$ ) is reported at the top of the bar plots, their percentage relative to the total number of OR genes is provided in parentheses. Source data are provided as a Source Data file.

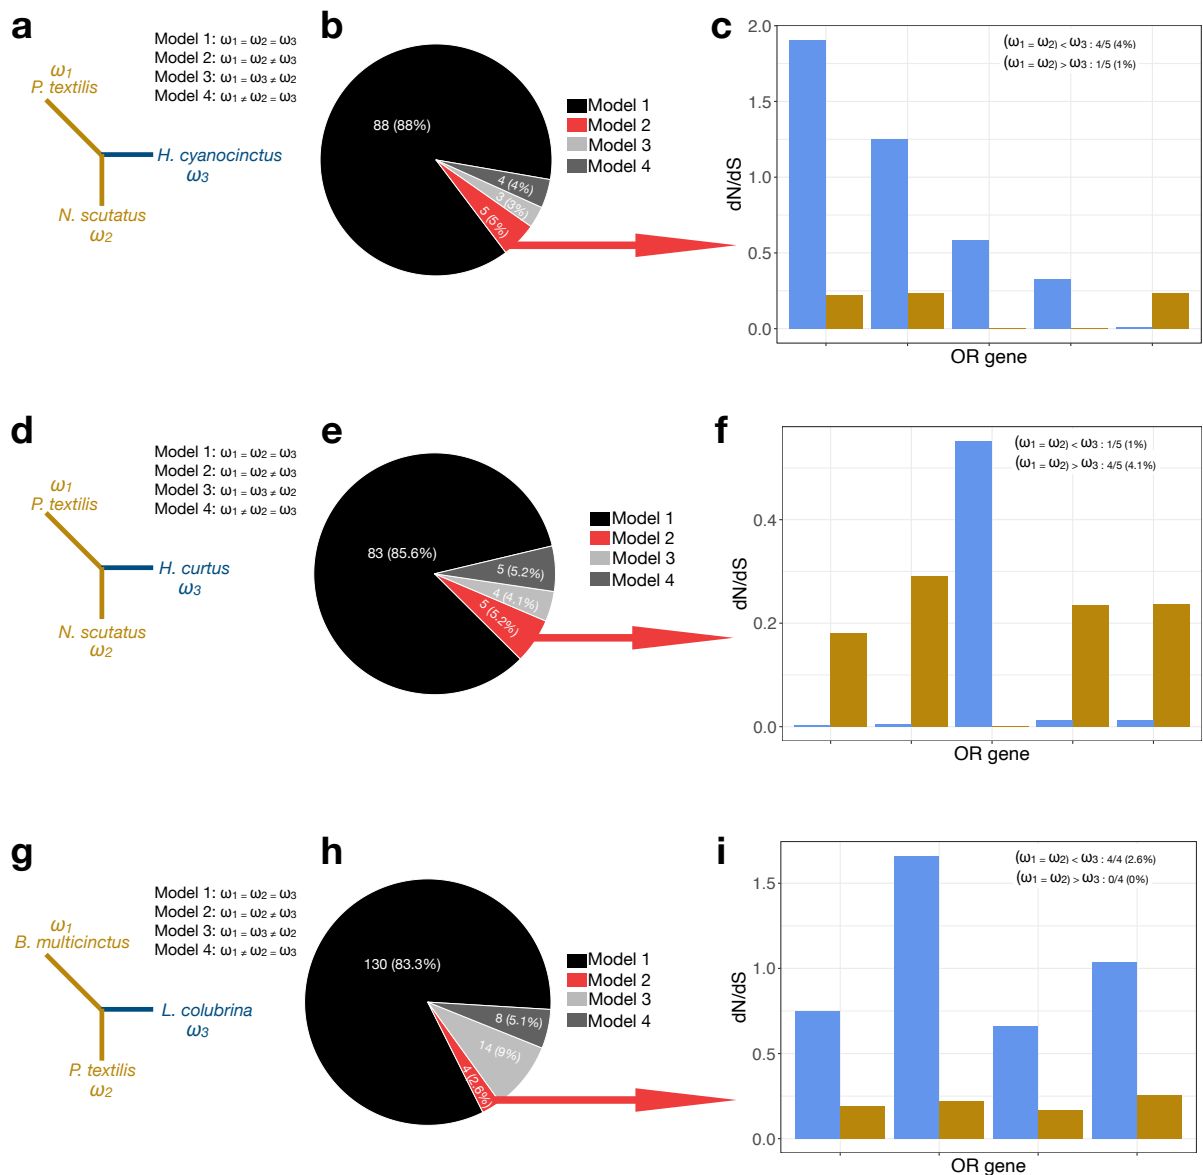

**Supplementary Fig. 52 | Selection test for *OR* genes in three marine turtles.** Unrooted species tree used for dN/dS ( $= \omega$  ratio) analysis as well as the different models tested. Model 5 allowing a different  $\omega$  ratio per branch is not shown as it was never significantly better than the other models. The brown branches correspond to terrestrial species outgroups (*Dermatemys mawii* and *Gopherus evgoodei*) and the blue branch corresponds to the marine turtle tested: *Dermochelys coriacea* (a), *Caretta caretta* (d), *Chelonia mydas* (g). The number and proportion of *OR* genes supported by each model is shown as pie chart for *Dermochelys coriacea* (b), *Caretta caretta* (e), *Chelonia mydas* (h). For each *OR* gene best supported by model 2, a bar plot shows the  $\omega$  ratio of the terrestrial branches (brown,  $\omega_1 = \omega_2$ ) and the  $\omega$  ratio of the marine turtle species (blue,  $\omega_3$ ): *Dermochelys coriacea* (c), *Caretta caretta* (f), *Chelonia mydas* (i). The number of *OR* genes best supported by model 2 and showing accelerated ( $(\omega_1 = \omega_2) < \omega_3$ ) or decelerated evolution ( $(\omega_1 = \omega_2) > \omega_3$ ) is reported at the top of the bar plots, their percentage relative to the total number of *OR* genes is provided in parentheses. Source data are provided as a Source Data file.

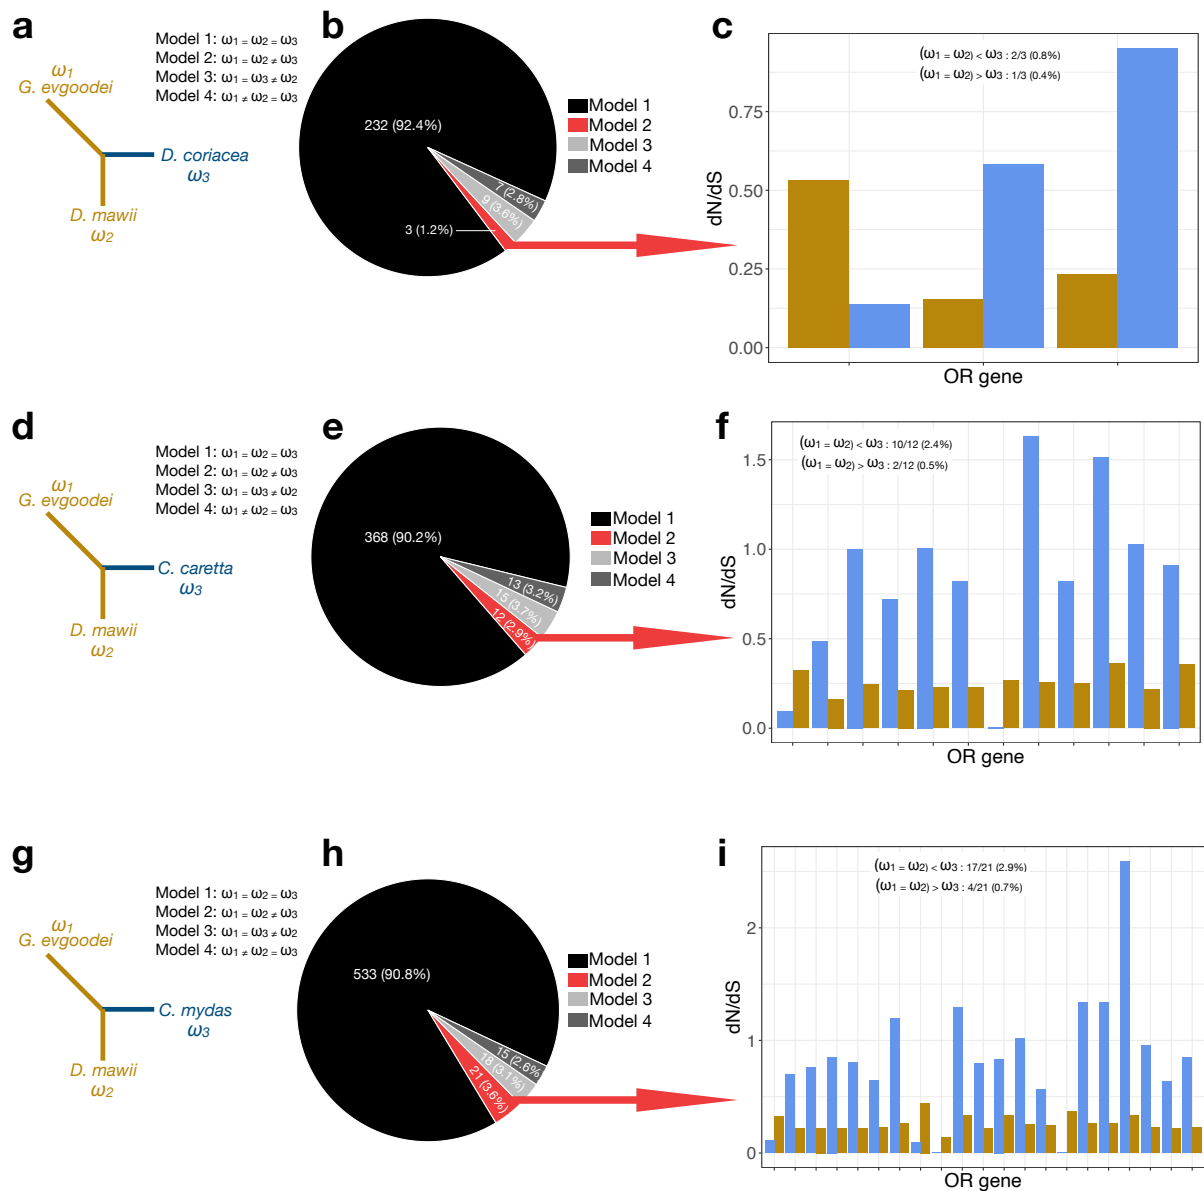

**Supplementary Fig. 53 | Correlations between the number of olfactory receptors and the olfactory organ.** Two-sided pGLS between the number of complete genes and olfactory organ sizes in mammals **(a)**, birds **(b)** and ray-finned fishes **(c)**. Some of these correlations were already suggested in previous studies but with much lower sample sizes:  $N = 19$  for the correlation between the number of complete *OR* genes and the relative olfactory bulb size of mammals in<sup>55</sup> ( $N = 35$  for the BUSCO80 and BUSCO90 dataset, and  $N = 11$  for the chromosome-scale assemblies dataset in our study);  $N = 9$  for the number of complete *OR* genes and the olfactory bulb volume of birds in<sup>56</sup> ( $N = 60$ ,  $N = 46$  and  $N = 24$  for the BUSCO80, BUSCO90 and chromosome-scale assemblies dataset, respectively, in our study);  $N = 72$  for the number of complete *OR*, *V2R* or total number of complete olfactory receptors and the number of lamellae in the olfactory epithelium (OE) of ray-finned fishes in<sup>24</sup> ( $N = 91$ ,  $N = 80$  and  $N = 57$  for the BUSCO80, BUSCO90 and chromosome-scale assemblies dataset, respectively, in our study). Olfactory bulb sizes of birds and mammals, as well as the mean number of lamellae in the OE of ray-finned fishes can be found in Supplementary Data 1. Source data are provided as a Source Data file.

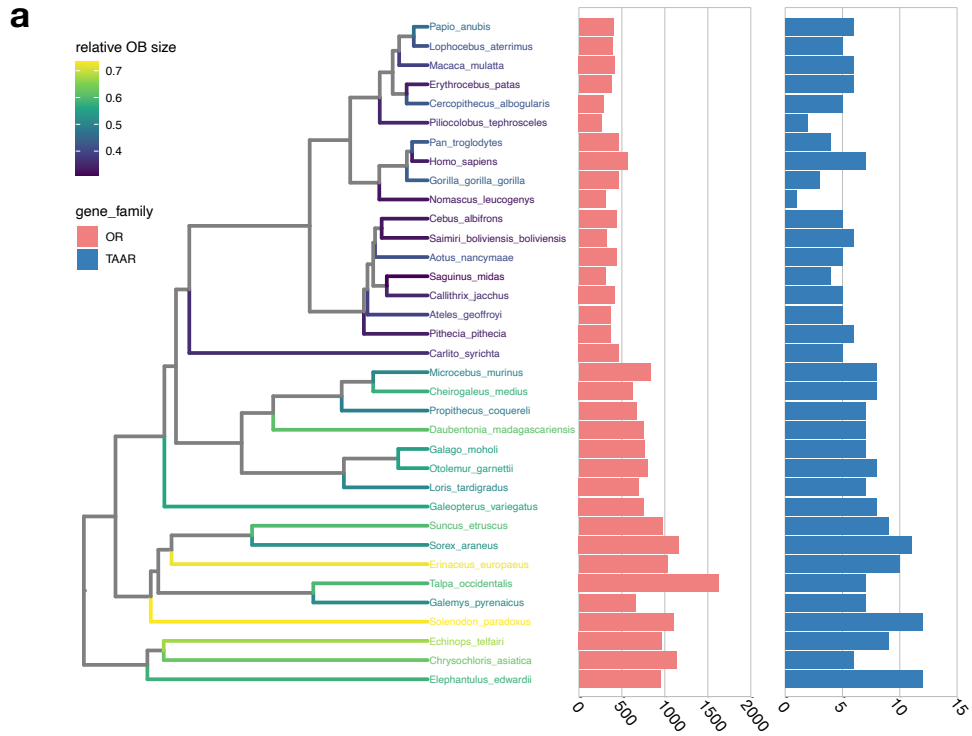

BUSCO80 (n=35)

BUSCO90 (n=35)

Chromosome (n=11)

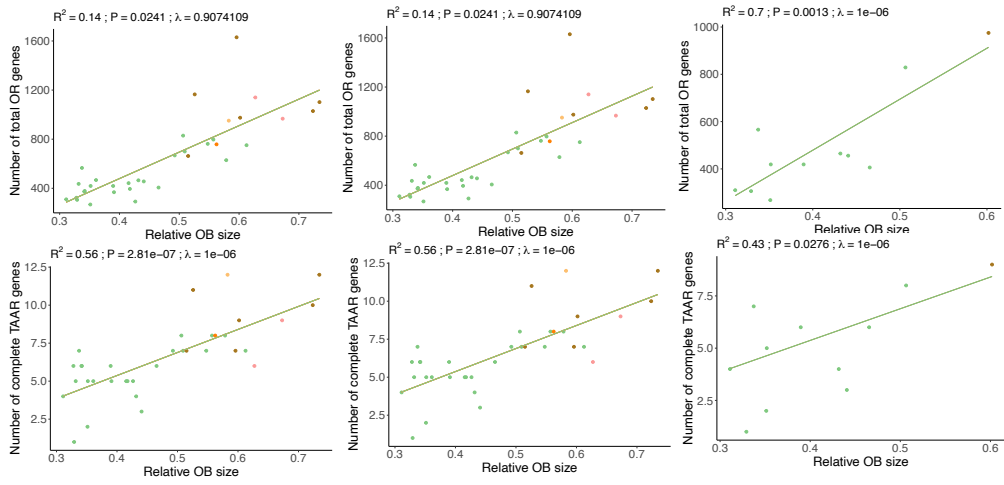

**b**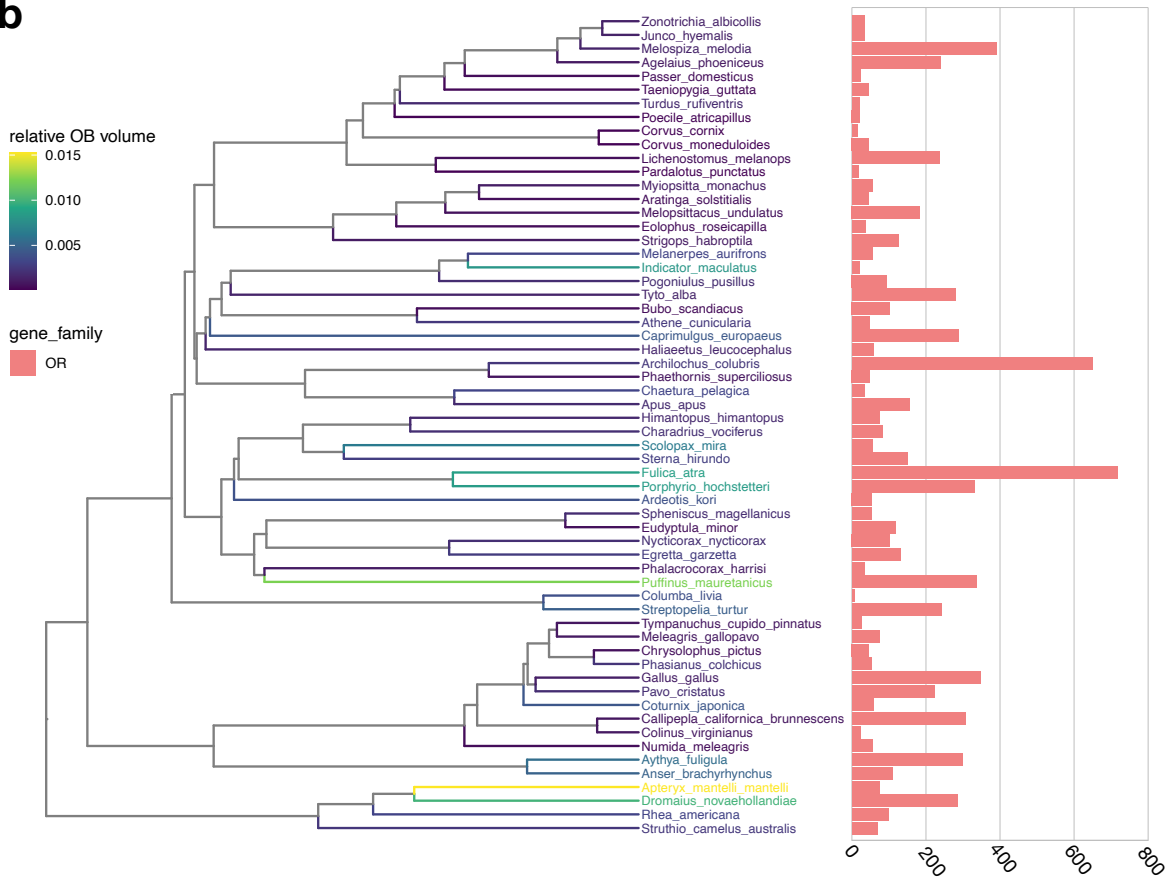**BUSCO80 (n=60)**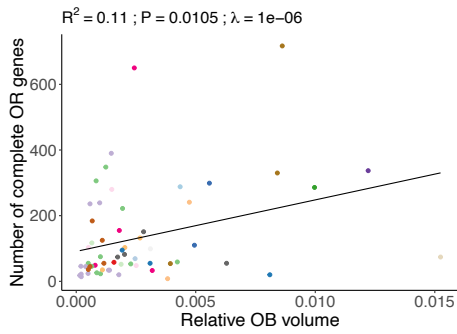**BUSCO90 (n=46)**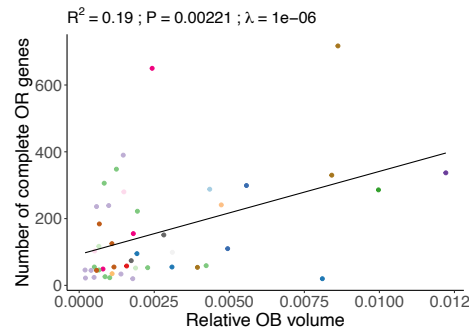**Chromosome (n=24)**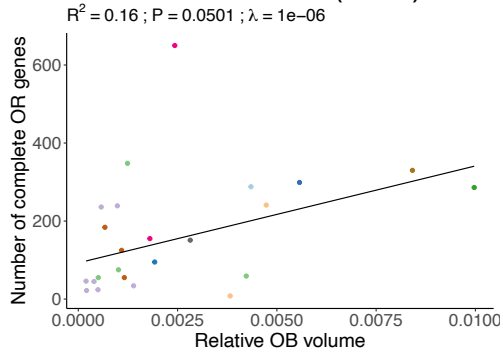





**Supplementary Fig. 54 | Impact of alternative species tree topologies on the pGLS analysis in mammals.** Each pGLS analysis presented in this study was re-computed with 50 alternative species tree topologies and the BUSCO80 dataset for the gene families *TAAR* versus *OR* (a), *V2R* versus *OR* (b), *V1R* versus *OR* (c), *V2R* versus *TAAR* (d), *V1R* versus *TAAR* (e), *V1R* versus *V2R* (f), *OLR* versus *TR* (g), *T2R* versus diet (h), *OR* versus olfactory bulb (OB) size (i), *TAAR* versus OB size (j), *OR* versus habitat (k), and *TAAR* versus habitat (l). The alternative species trees were computed based on 20 concatenated BUSCO genes, and using three calibrations points retrieved on TimeTree.org (Supplementary Data 1). Each plot represents the pGLS  $R^2$  (y-axis) with these 50 alternative trees depending on their Robinson-Foulds distance to the reference tree used in the study (x-axis). Red dots correspond to a significant  $P_{\text{PGLS}}$  ( $<0.05$ ), whereas blue dots correspond to non-significant  $P_{\text{PGLS}}$ -values ( $\geq 0.05$ ). The horizontal lines correspond to the pGLS  $R^2$  obtained with the reference tree. Above each plot, the number of significant  $P_{\text{PGLS}}$ -values is reported. Whenever the reference topology yielded a significant  $P_{\text{PGLS}}$ -value, alternative topologies were also significant and had a very similar  $R^2$ , except when comparing the number of complete *OR* genes with OB size (10/50 alternative topologies were significant). For pGLS with a categorical predictor (h, k, l), only the  $P_{\text{PGLS}}$ -values based on the Robinson-Foulds distance are reported. Source data are provided as a Source Data file.

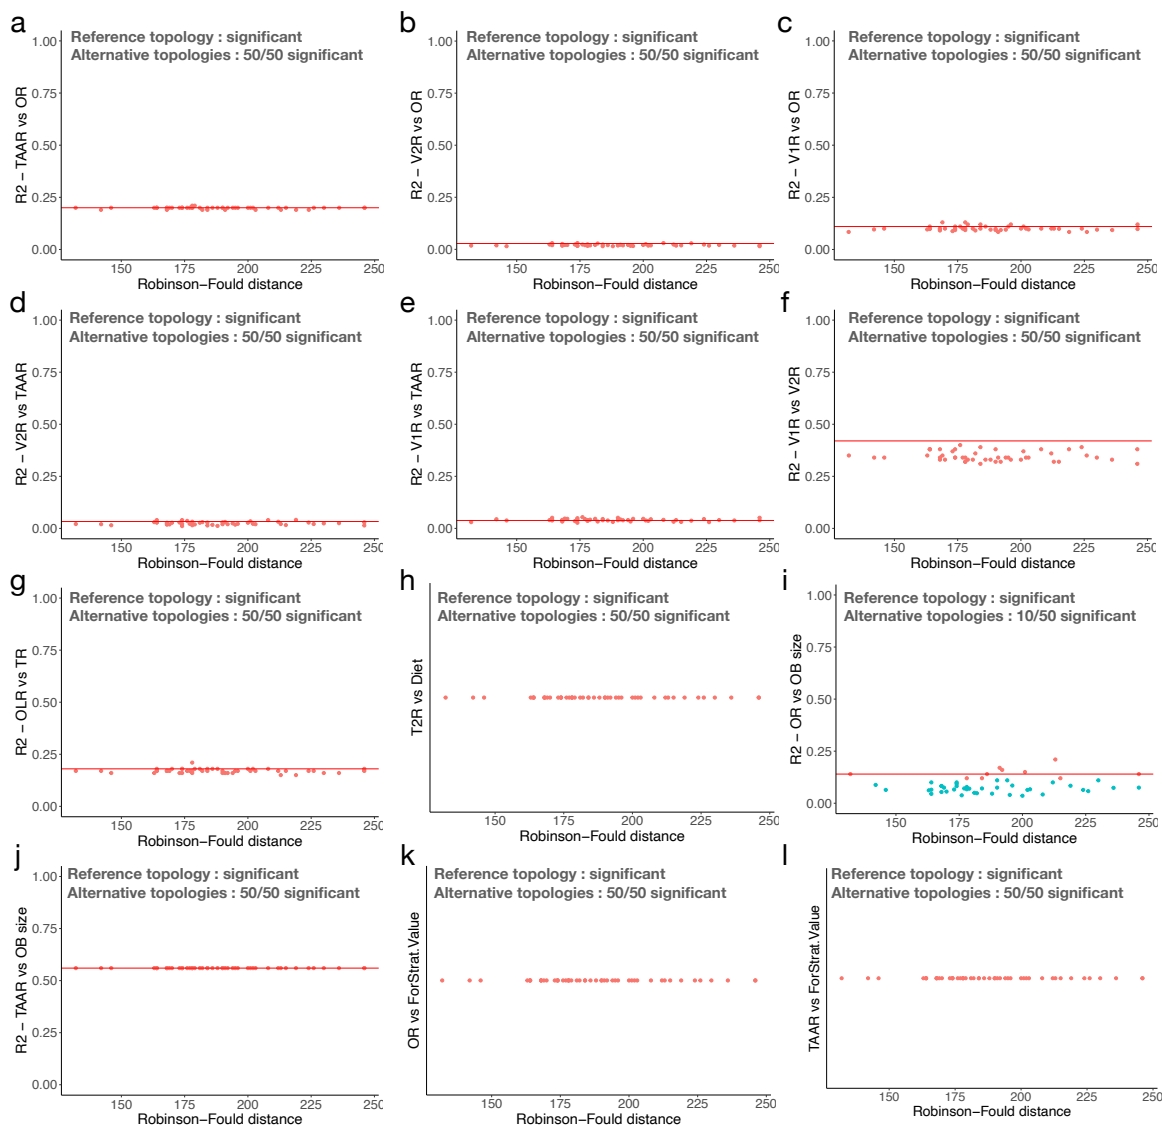

 Significant (p.value < 0.05)  
 Non significant (p.value ≥ 0.05)

**Supplementary Fig. 55 | Impact of alternative species tree topologies on the pGLS analysis in birds.** Each pGLS analysis presented in this study was re-computed with 50 alternative species tree topologies and the BUSCO80 dataset for *TAAR* versus *OR* (a), *OLR* versus *TR* (b), *T2R* versus diet (c), *OR* versus olfactory bulb (*OB*) size (d), *OR* versus migration (e), *T2R* versus migration (f), *OR* versus habitat (g), and *OR* versus primary lifestyle (h). The alternative species trees were computed based on 20 concatenated BUSCO genes, and using three calibrations points retrieved on TimeTree.org (Supplementary Data 1). Each plot represents the pGLS  $R^2$  (y-axis) with these 50 alternative trees depending on their Robinson-Foulds distance to the reference tree used in the study (x-axis). Red dots correspond to a significant  $P_{\text{PGLS}}$  ( $<0.05$ ), whereas blue dots correspond to non-significant  $P_{\text{PGLS}}$ -values ( $\geq 0.05$ ). The horizontal lines correspond to the pGLS  $R^2$  obtained with the reference tree. Above each plot, the number of significant  $P_{\text{PGLS}}$ -values is reported. Whenever the reference topology yielded a significant  $P_{\text{PGLS}}$ -value, alternative topologies were also significant and had a very similar  $R^2$ , except when comparing the number of complete *T2R* genes with migratory behavior (19/50 alternative topologies were significant) and the number of complete *OR* genes with habitat (10/50 alternative topologies were significant). Similarly, when the reference topology yielded a non-significant  $P_{\text{PGLS}}$  (c), only one out of fifty alternative topologies was significant. For pGLS with a categorical predictor (c, e, f, g, h), only the  $P_{\text{PGLS}}$ -values based on the Robinson-Foulds distance are reported. Source data are provided as a Source Data file.

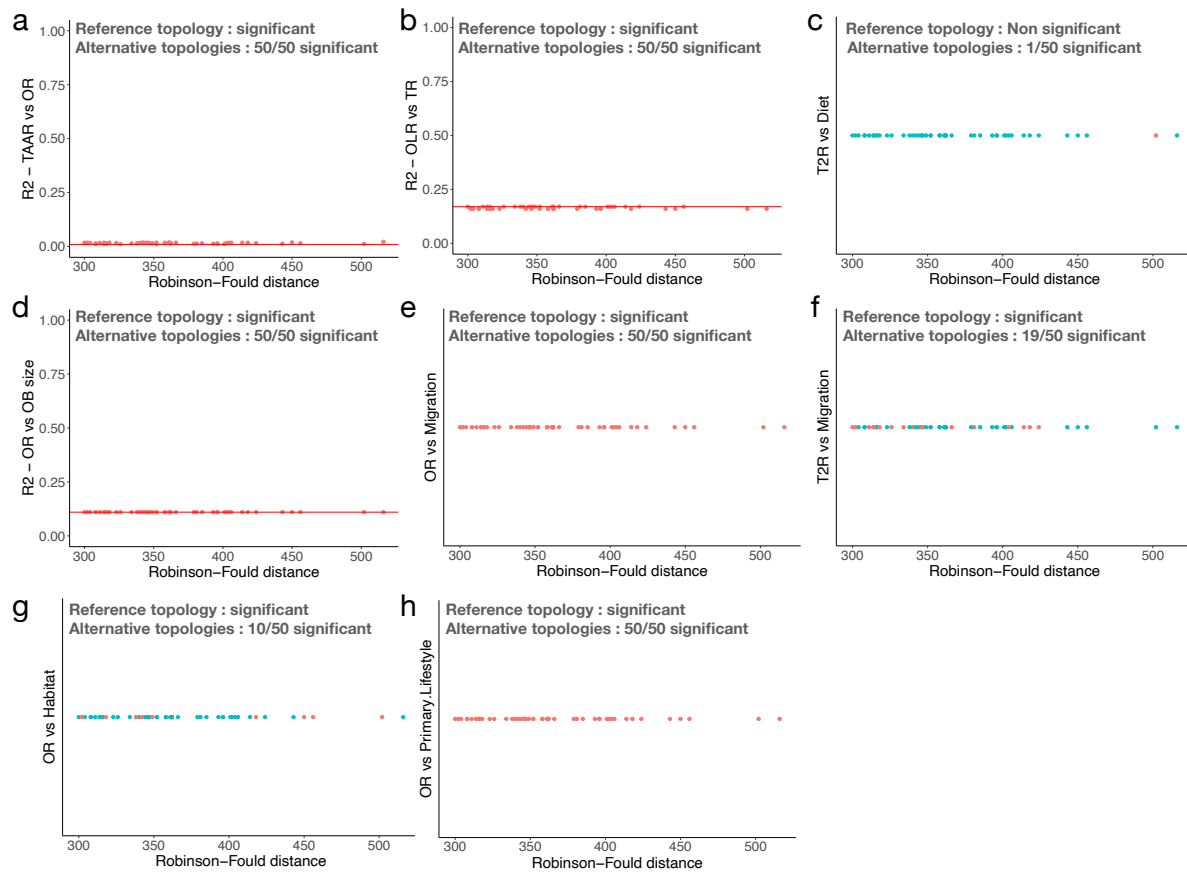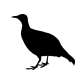

● Significant (p.value < 0.05)  
● Non significant (p.value  $\geq$  0.05)

**Supplementary Fig. 56 | Impact of alternative species tree topologies on the pGLS analysis in ray-finned fish.** Each pGLS analysis presented in this study was re-computed with 50 alternative species tree topologies and the BUSCO80 dataset for *TAAR* versus *OR* (a), *V2R* versus *OR* (b), *V1R* versus *OR* (c), *V2R* versus *TAAR* (d), *V1R* versus *TAAR* (e), *V1R* versus *V2R* (f), *T1R* versus *T2R* (g), *OLR* versus *TR* (h), *T2R* versus diet (i), *OR* versus number of lamellae in the olfactory epithelium (j), *V2R* versus number of lamellae (k), *OLR* versus number of lamellae (l), and *T1R* versus habitat (m). The alternative species trees were computed based on 20 concatenated BUSCO genes, and using three calibrations points retrieved on TimeTree.org (Supplementary Data 1). Each plot represents the pGLS  $R^2$  (y-axis) with these 50 alternative trees depending on their Robinson-Foulds distance to the reference tree used in the study (x-axis). Red dots correspond to a significant  $P_{\text{PGLS}}$  ( $<0.05$ ), whereas blue dots correspond to non-significant  $P_{\text{PGLS}}$ -values ( $\geq 0.05$ ). The horizontal lines correspond to the pGLS  $R^2$  obtained with the reference tree. Above each plot, the number of significant  $P_{\text{PGLS}}$ -values is reported. Whenever the reference topology yielded a significant  $P_{\text{PGLS}}$ -value, alternative topologies were also significant and had a very similar  $R^2$ . For pGLS with a categorical predictor (i, m), only the  $P_{\text{PGLS}}$ -values based on the Robinson-Foulds distance are reported. Source data are provided as a Source Data file.

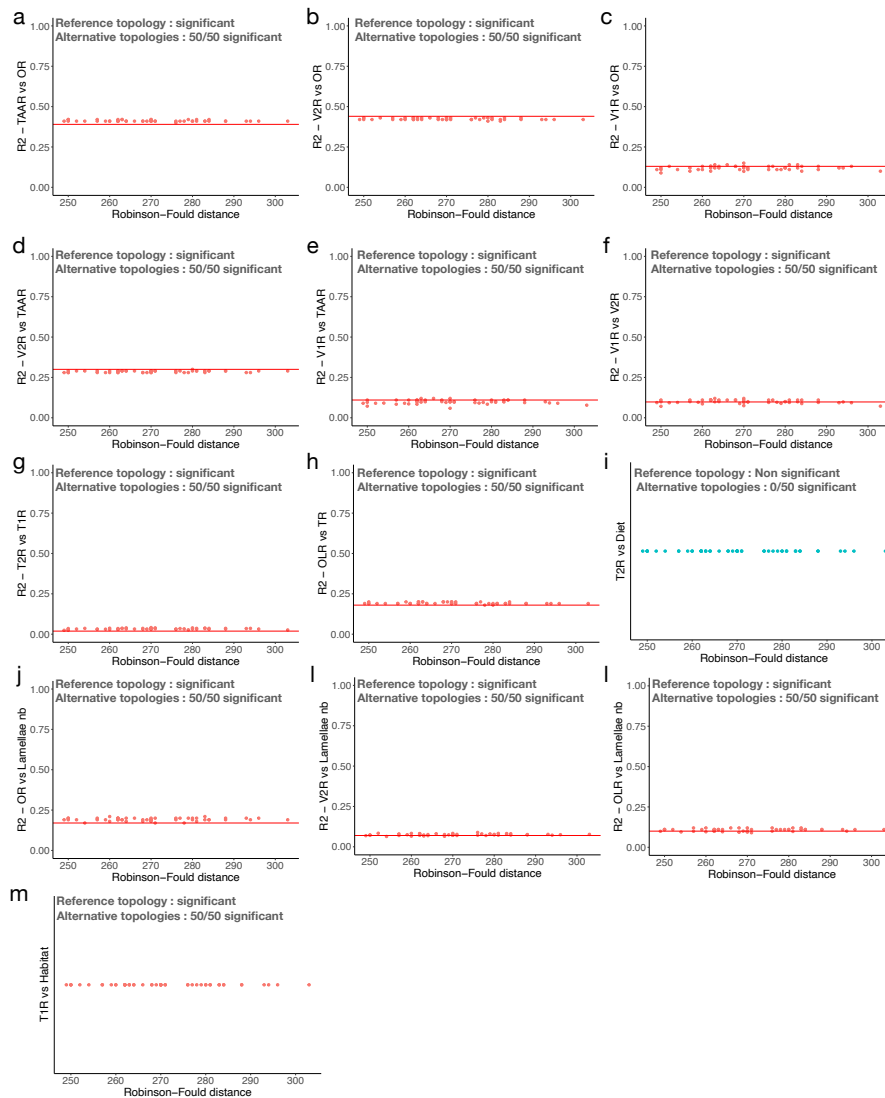

 Significant (p.value < 0.05)  
 Non significant (p.value  $\geq 0.05$ )
